# Supplementary material for: Synthesis of N-Substituted Iminosugar C-Glycosides and Evaluation as Promising α-Glucosidase Inhibitors
Source: MDPI journal article supplement (doi:10.3390/molecules27175517), 2022-08-27
Supplement: s1 [file s1]

# Synthesis of *N*-substituted iminosugar *C*-glycosides and evaluation as promising $\alpha$ -glucosidase inhibitors

Haibo Wang<sup>1,2,3,†</sup>, Senling Tang<sup>1,2,†</sup>, Guoqing Zhang<sup>1,4</sup>, Yang Pan<sup>1,2</sup>, Wei Jiao<sup>1,\*</sup> and Huawu Shao<sup>1,\*</sup>

<sup>1</sup> Natural Products Research Centre, Chengdu Institute of Biology, Chinese Academy of Sciences, Chengdu 610041, China

<sup>2</sup> University of Chinese Academy of Sciences, Beijing 100049, China

<sup>3</sup> Zhejiang Hongyuan Pharmaceutical Co., Ltd., Linhai 317016, China

<sup>4</sup> School of Pharmacy, North Sichuan Medical College, Nanchong 637100, China

\* Correspondence: jiaowei@cib.ac.cn (W.J.); shaohw@cib.ac.cn (H.S.)

† These authors contributed equally to this work.

## Contents:

|                                                                                                                                      |     |
|--------------------------------------------------------------------------------------------------------------------------------------|-----|
| 1. <sup>1</sup> H NMR and <sup>13</sup> C NMR spectra of <i>N</i> -substituted iminosugar <i>C</i> -glycosides( <b>5a-5π</b> ) ..... | 2   |
| 2. <sup>1</sup> H NMR and <sup>13</sup> C NMR spectra of <i>N</i> -substituted iminosugar <i>C</i> -glycosides( <b>6a-6i</b> ) ..... | 119 |

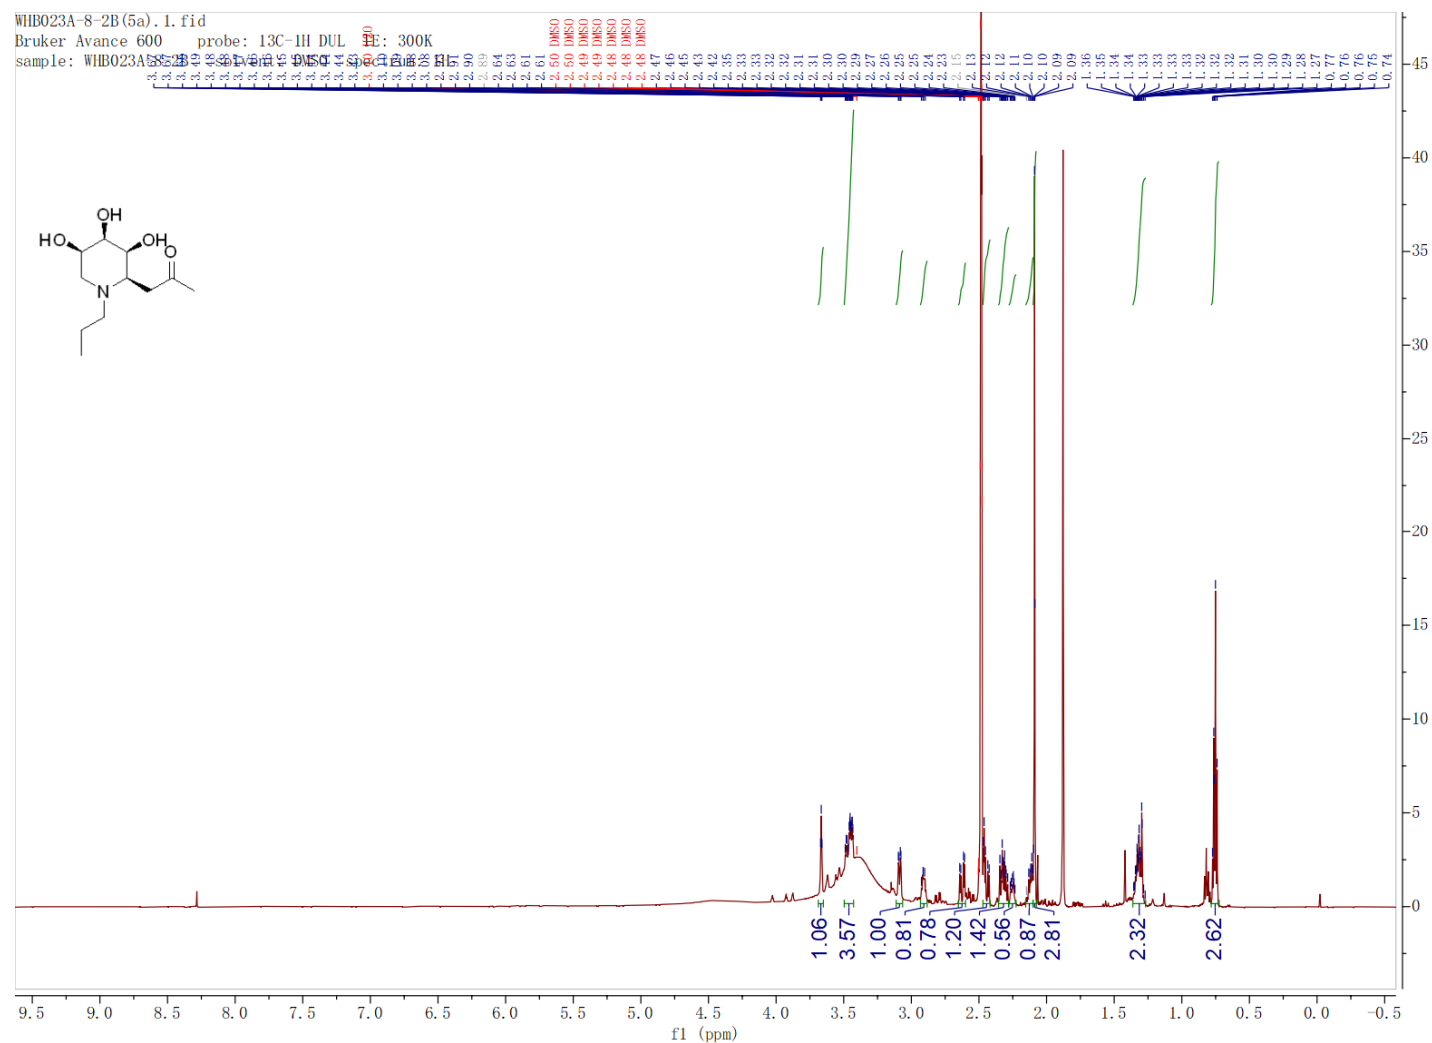

Figure S1. The <sup>1</sup>H NMR of compound 5a.

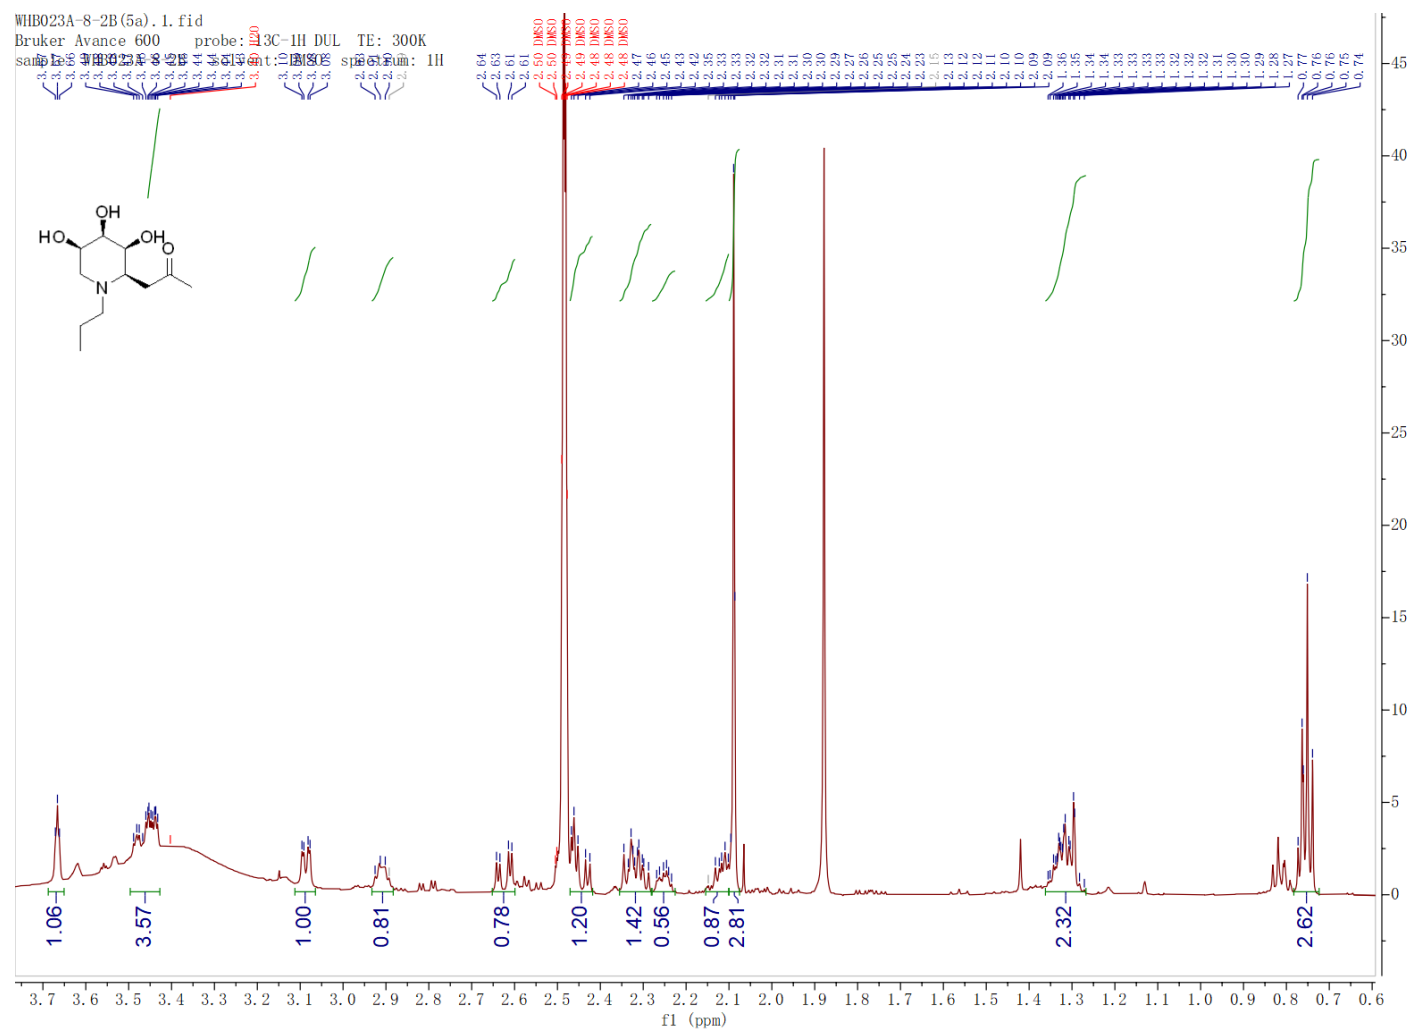

Figure S2. Partial region amplification of the  $^1\text{H}$  NMR of compound 5a.

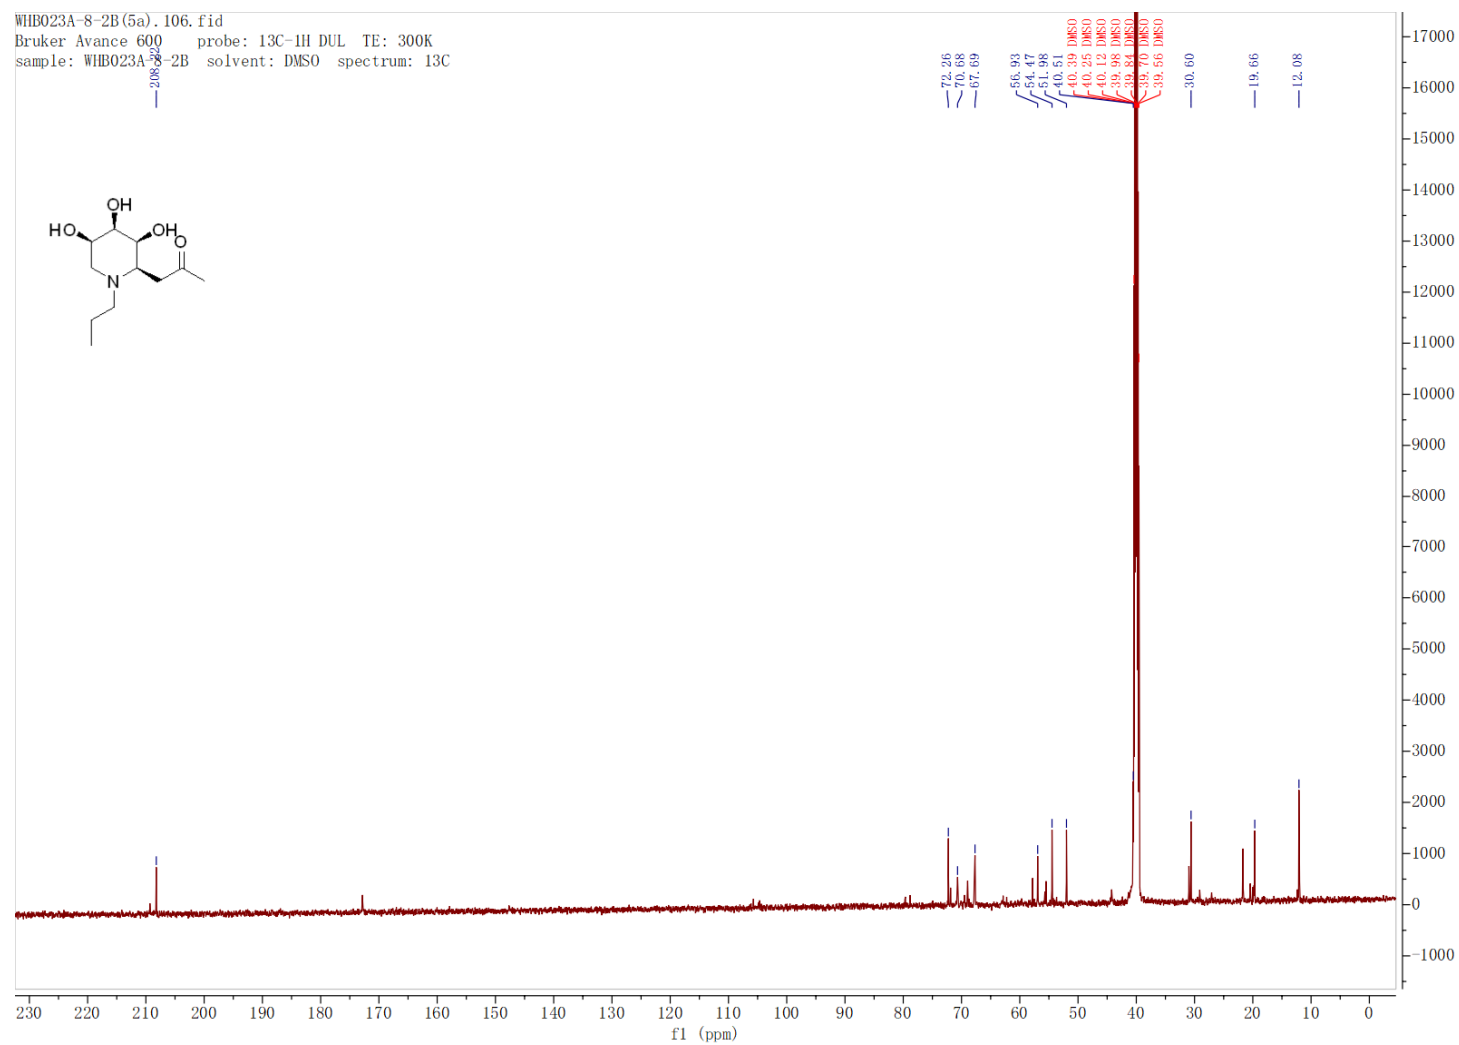

Figure S3. The  $^{13}\text{C}$  NMR of compound 5a.



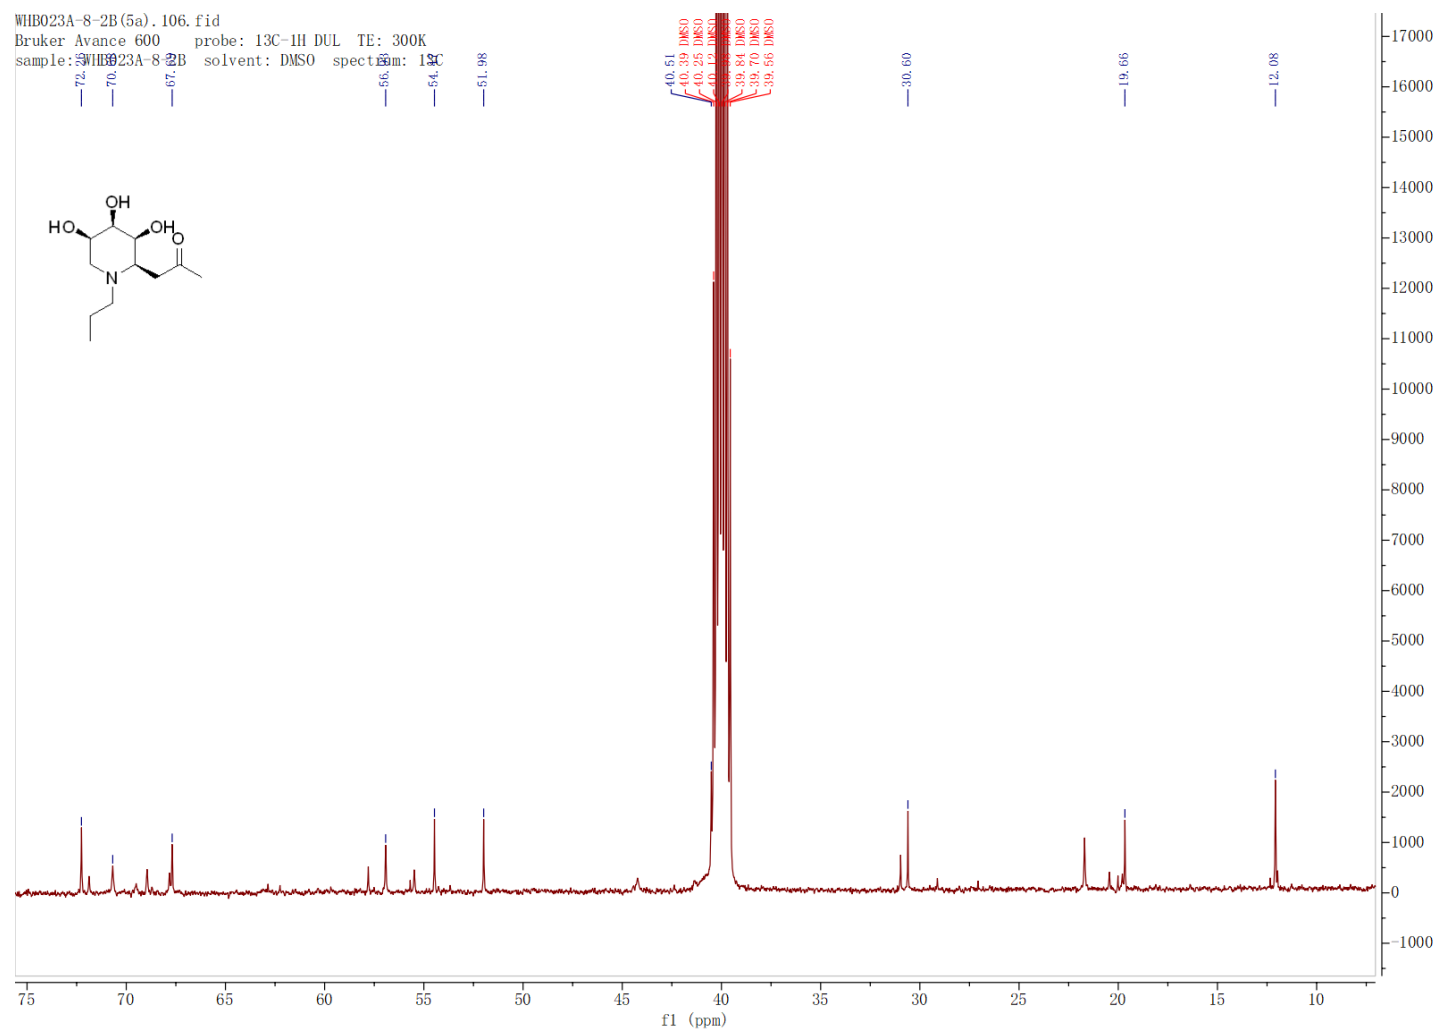

**Figure S4.** Partial region amplification of the  $^{13}\text{C}$  NMR of compound 5a.



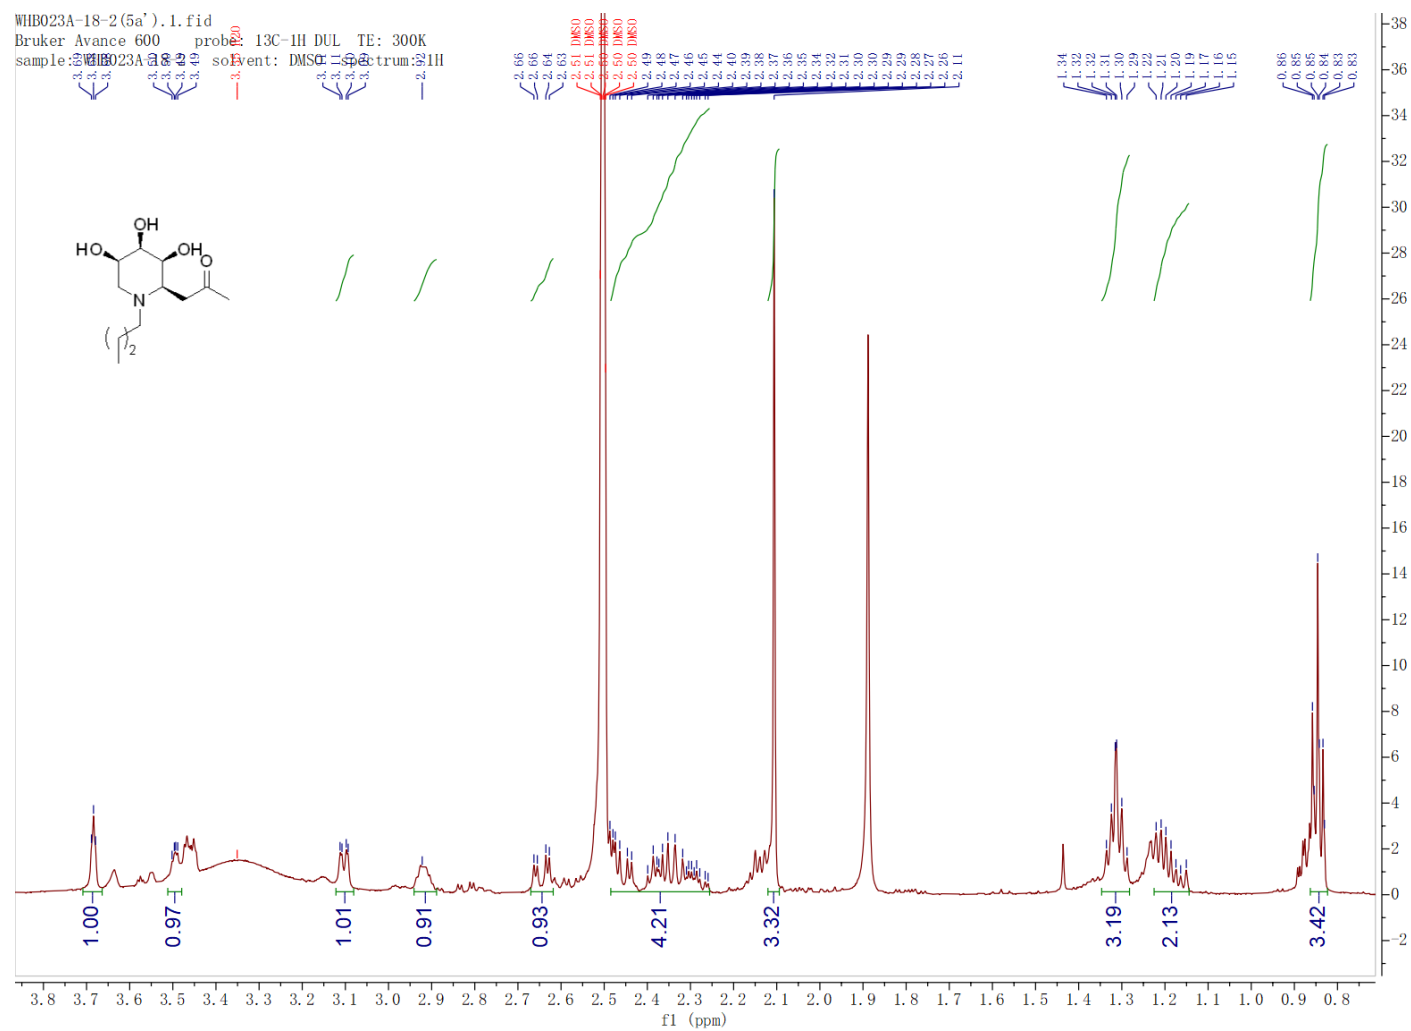

**Figure S6.** Partial region amplification of the  $^1\text{H}$  NMR of compound **5b**.

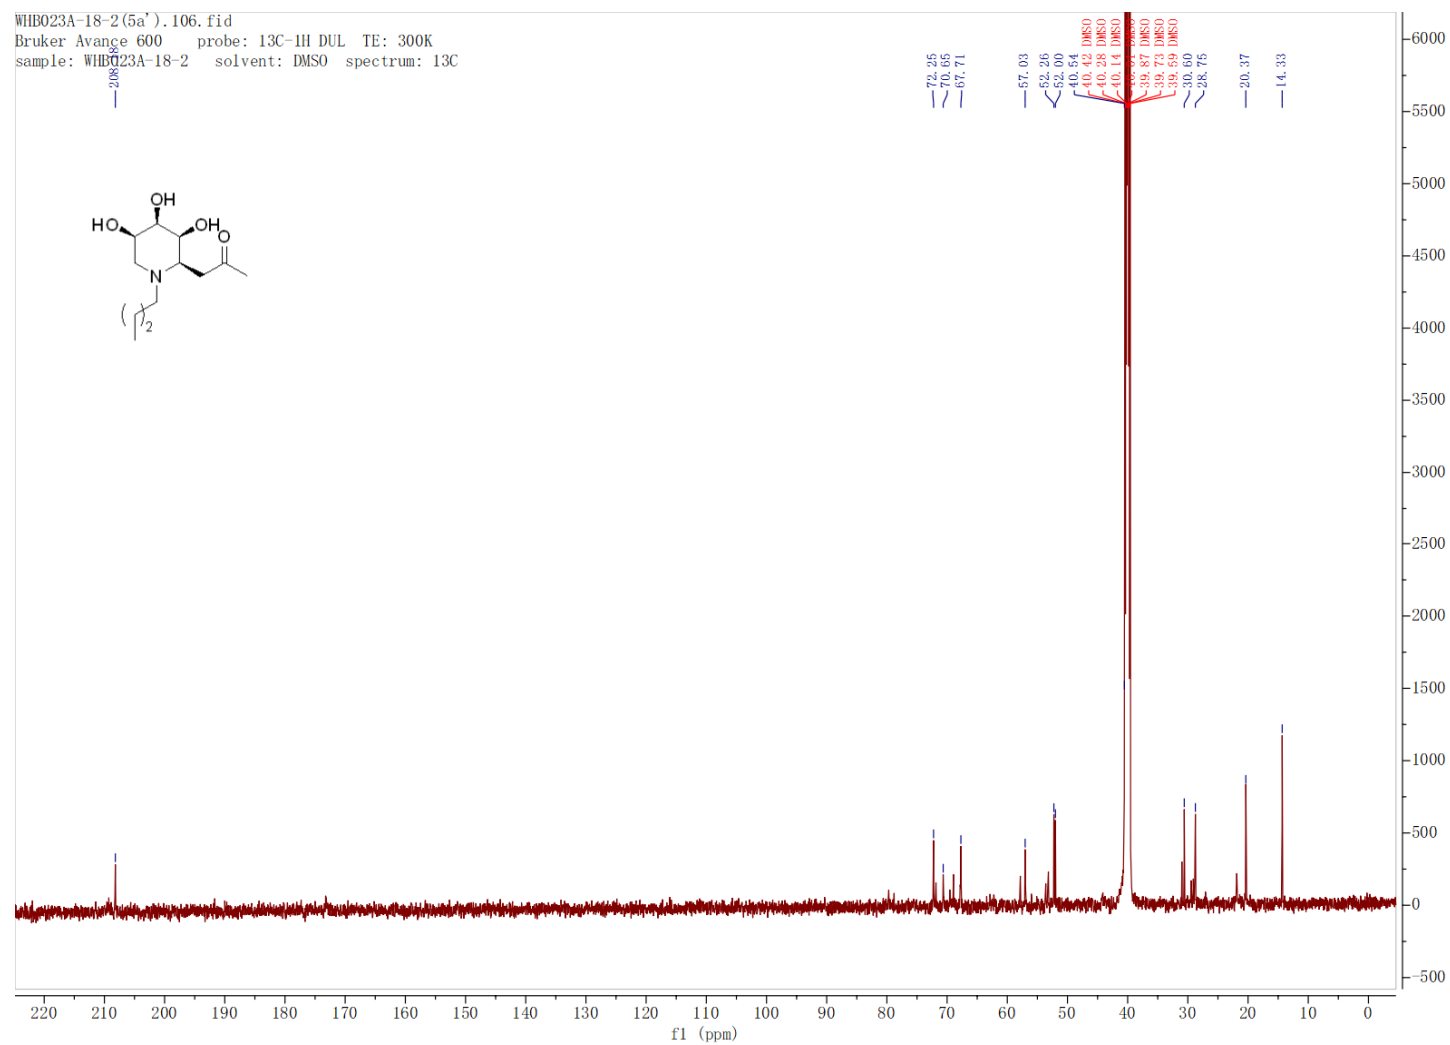

Figure S7. The  $^{13}\text{C}$  NMR of compound 5b.

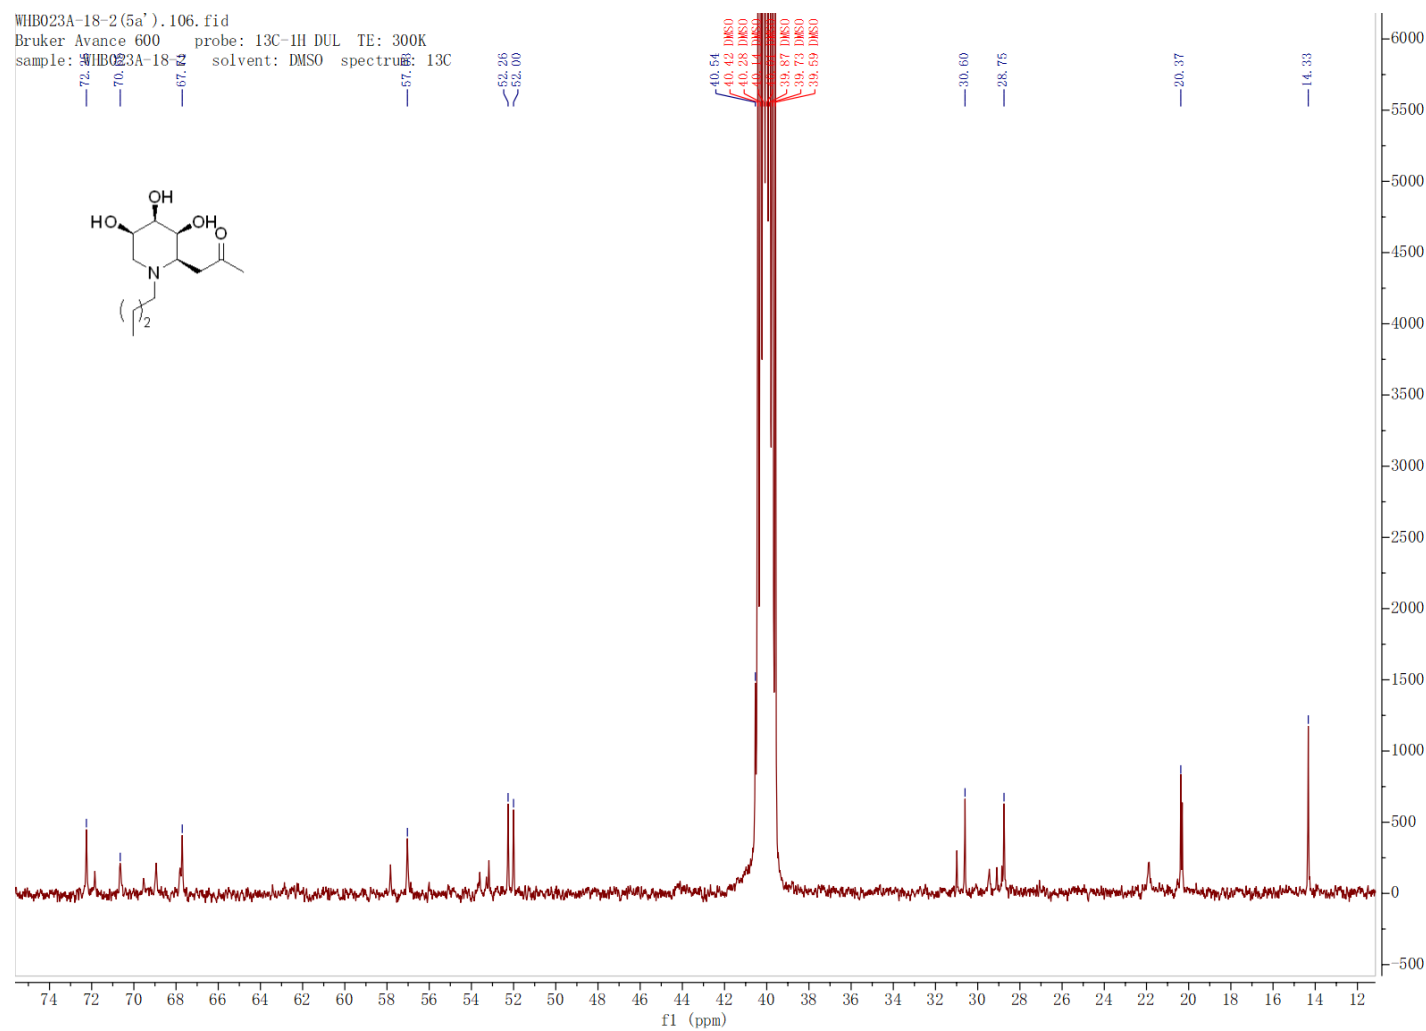

**Figure S8.** Partial region amplification of the  $^{13}\text{C}$  NMR of compound **5b**.

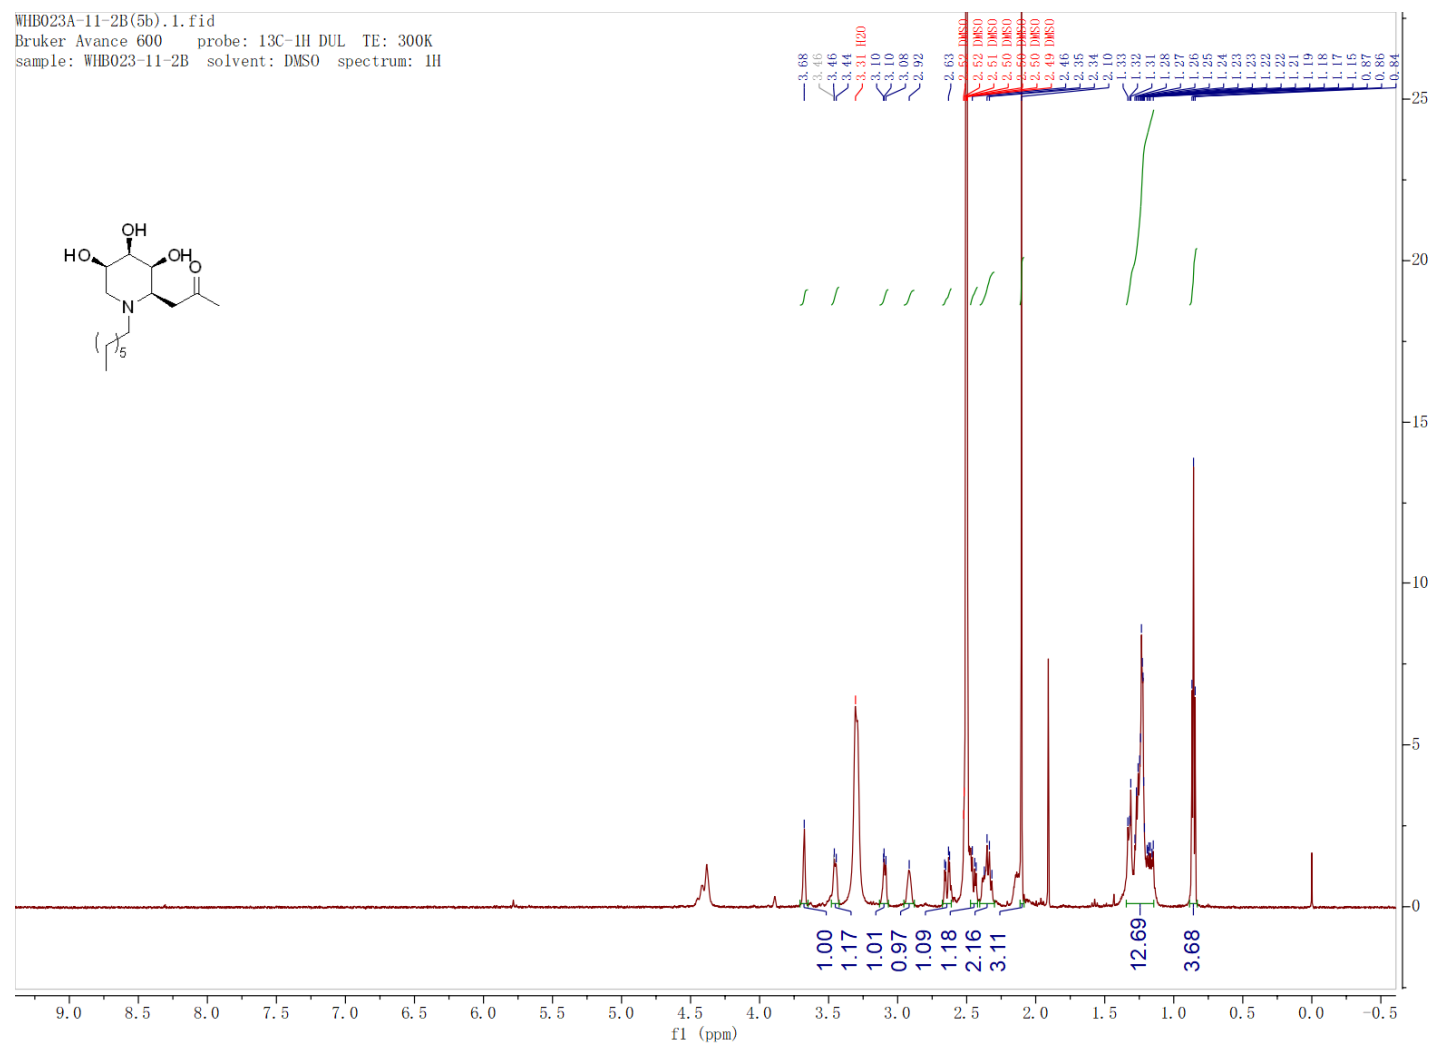

Figure S9. The  $^1\text{H}$  NMR of compound 5c.

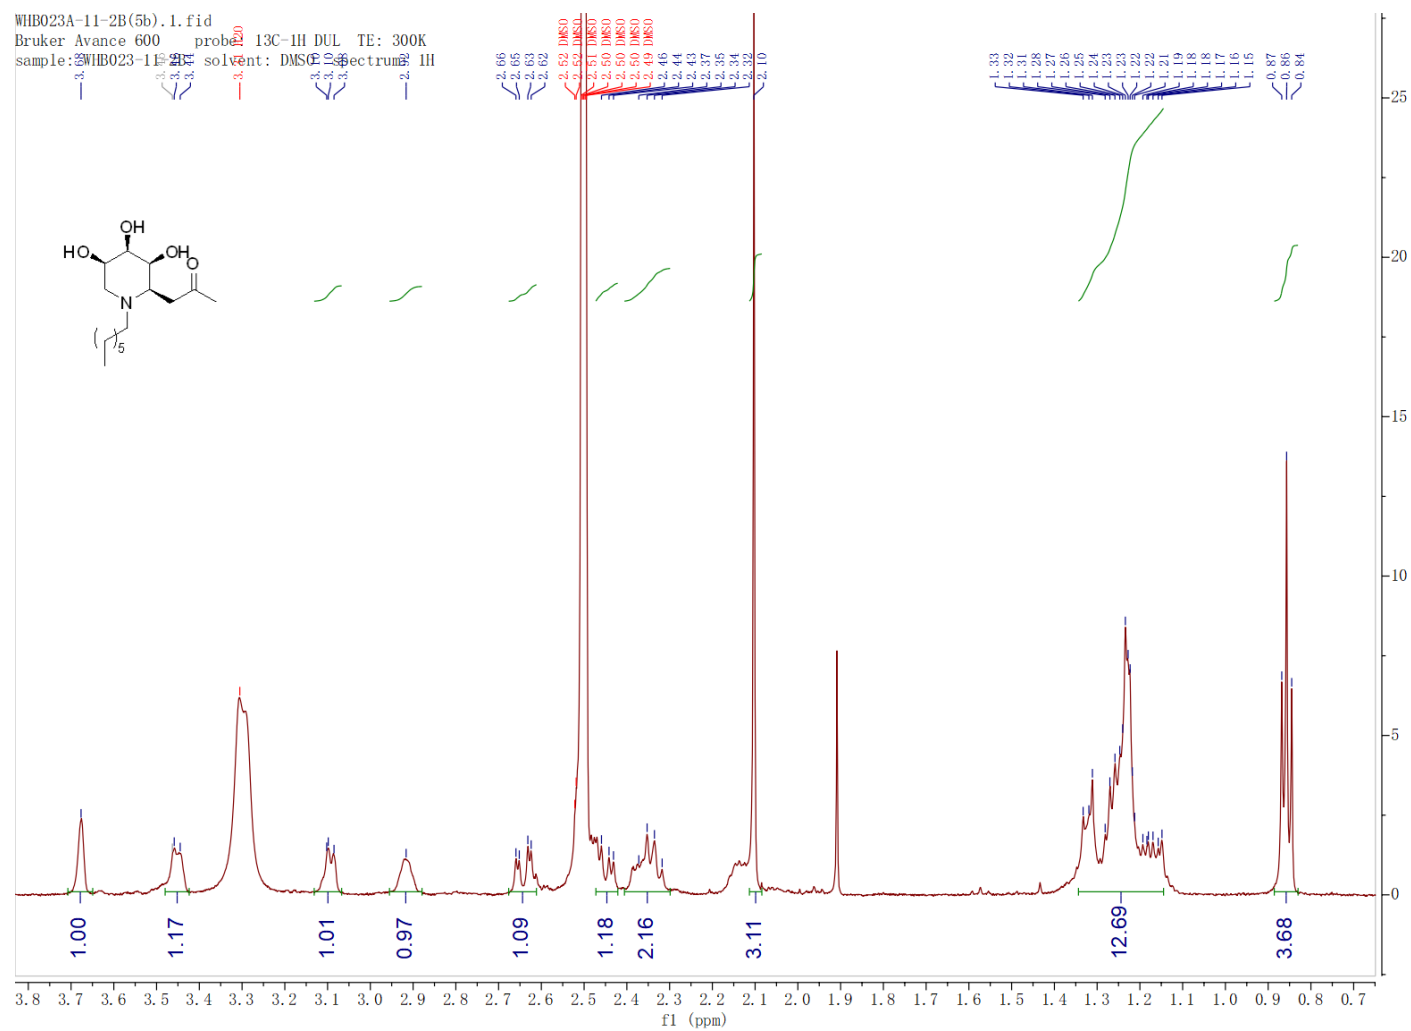

**Figure S10.** Partial region amplification of the  $^1\text{H}$  NMR of compound **5c**.

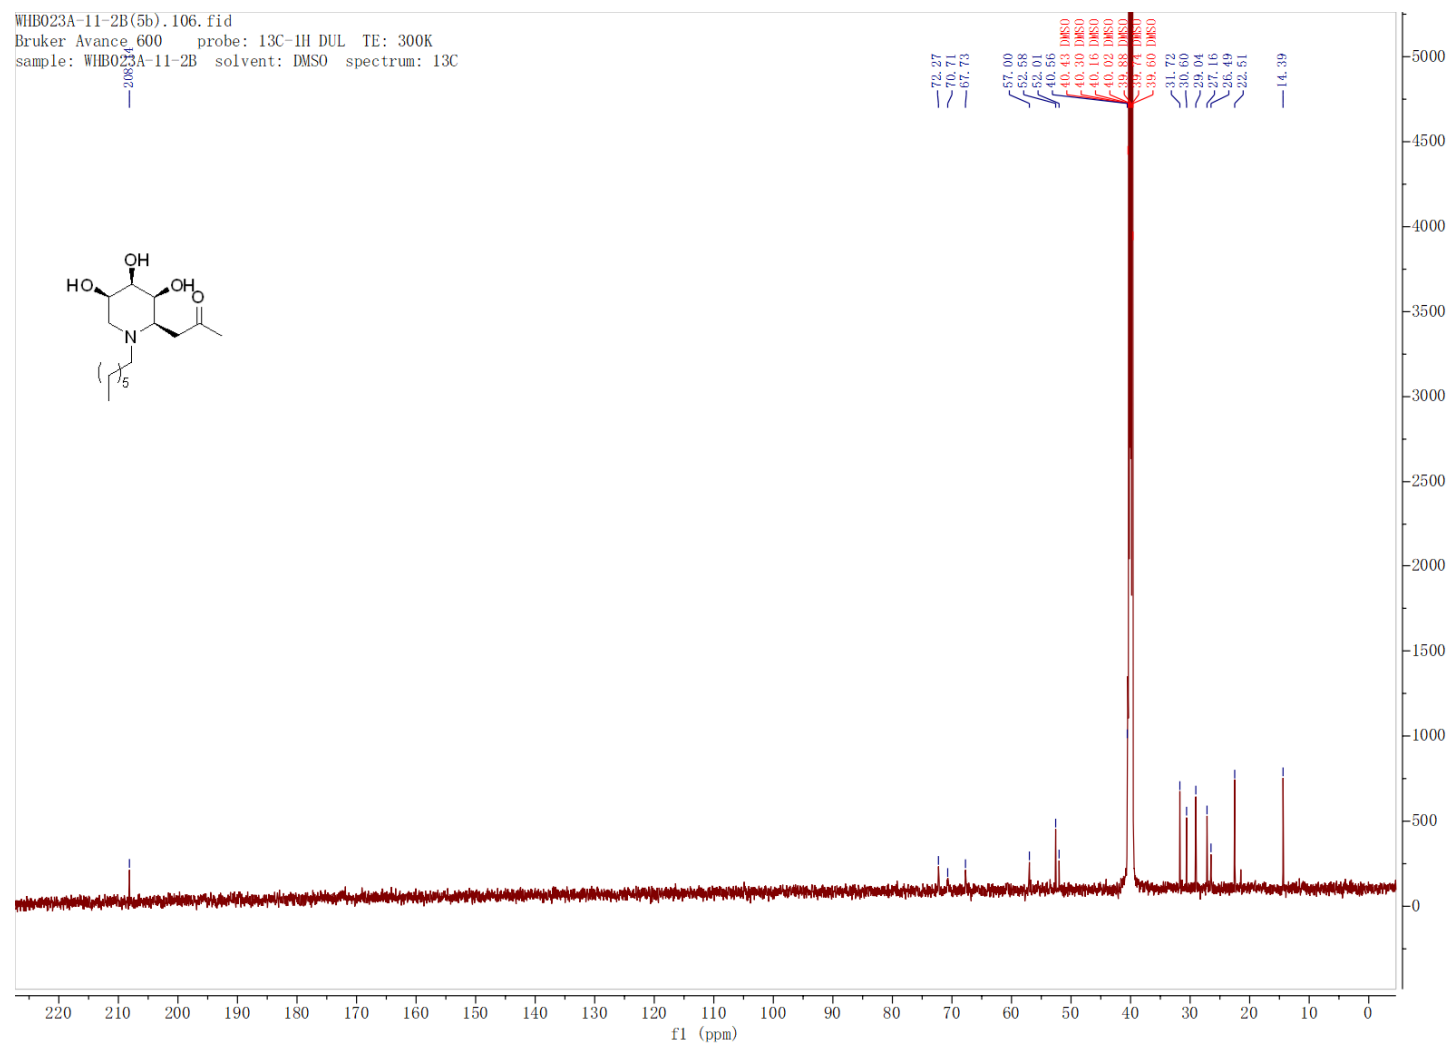

Figure S11. The  $^{13}\text{C}$  NMR of compound 5c.



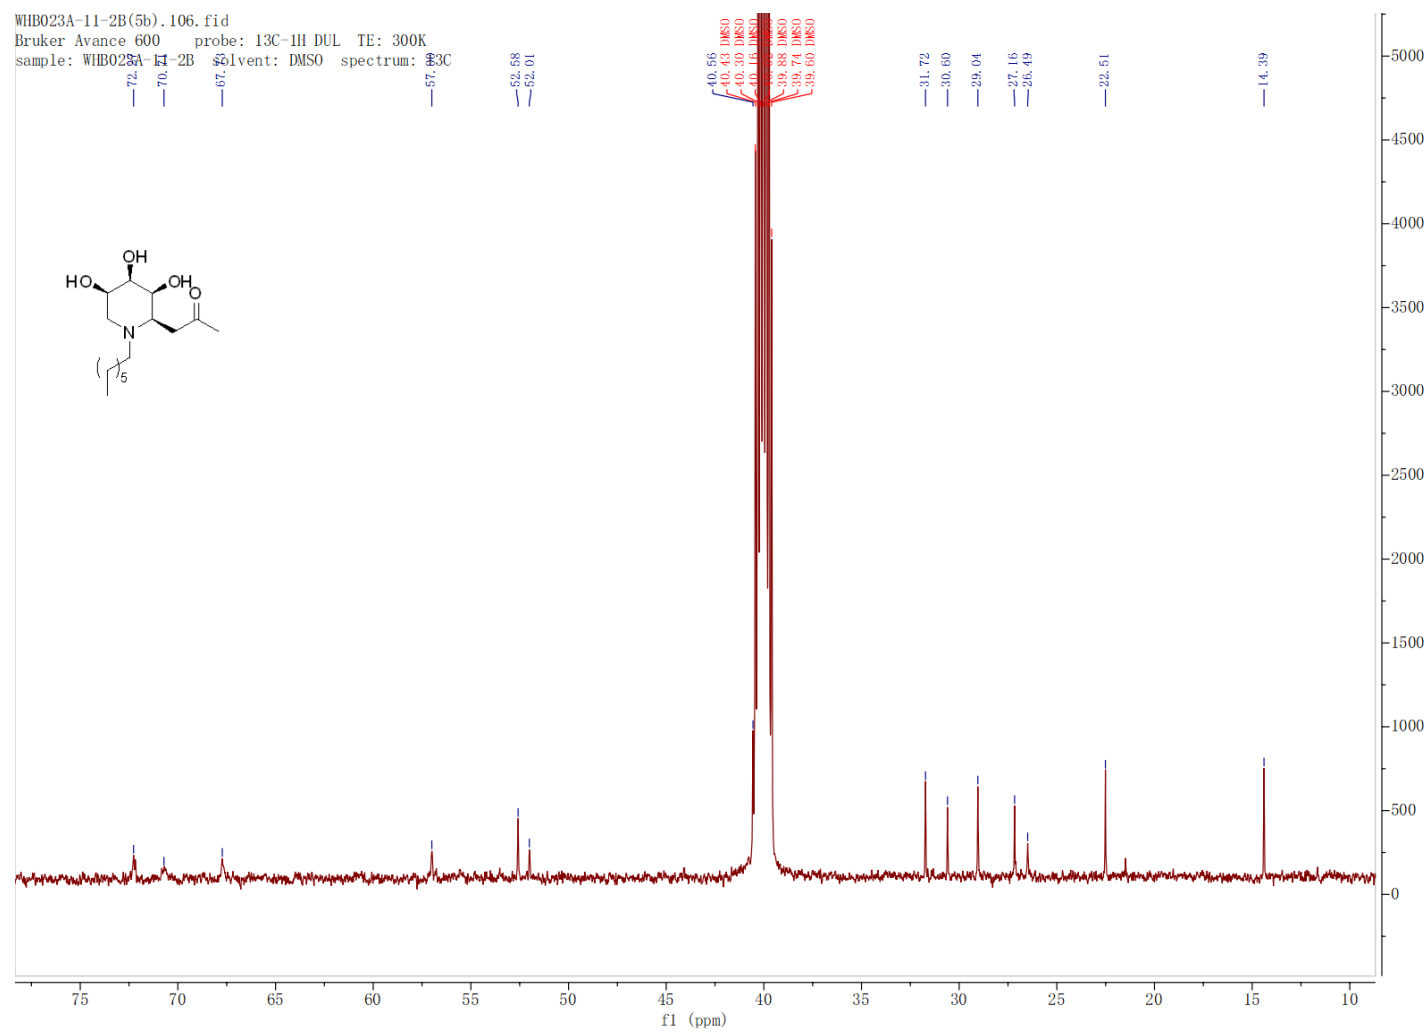

Figure S12. Partial region amplification of the  $^{13}\text{C}$  NMR of compound 5c.



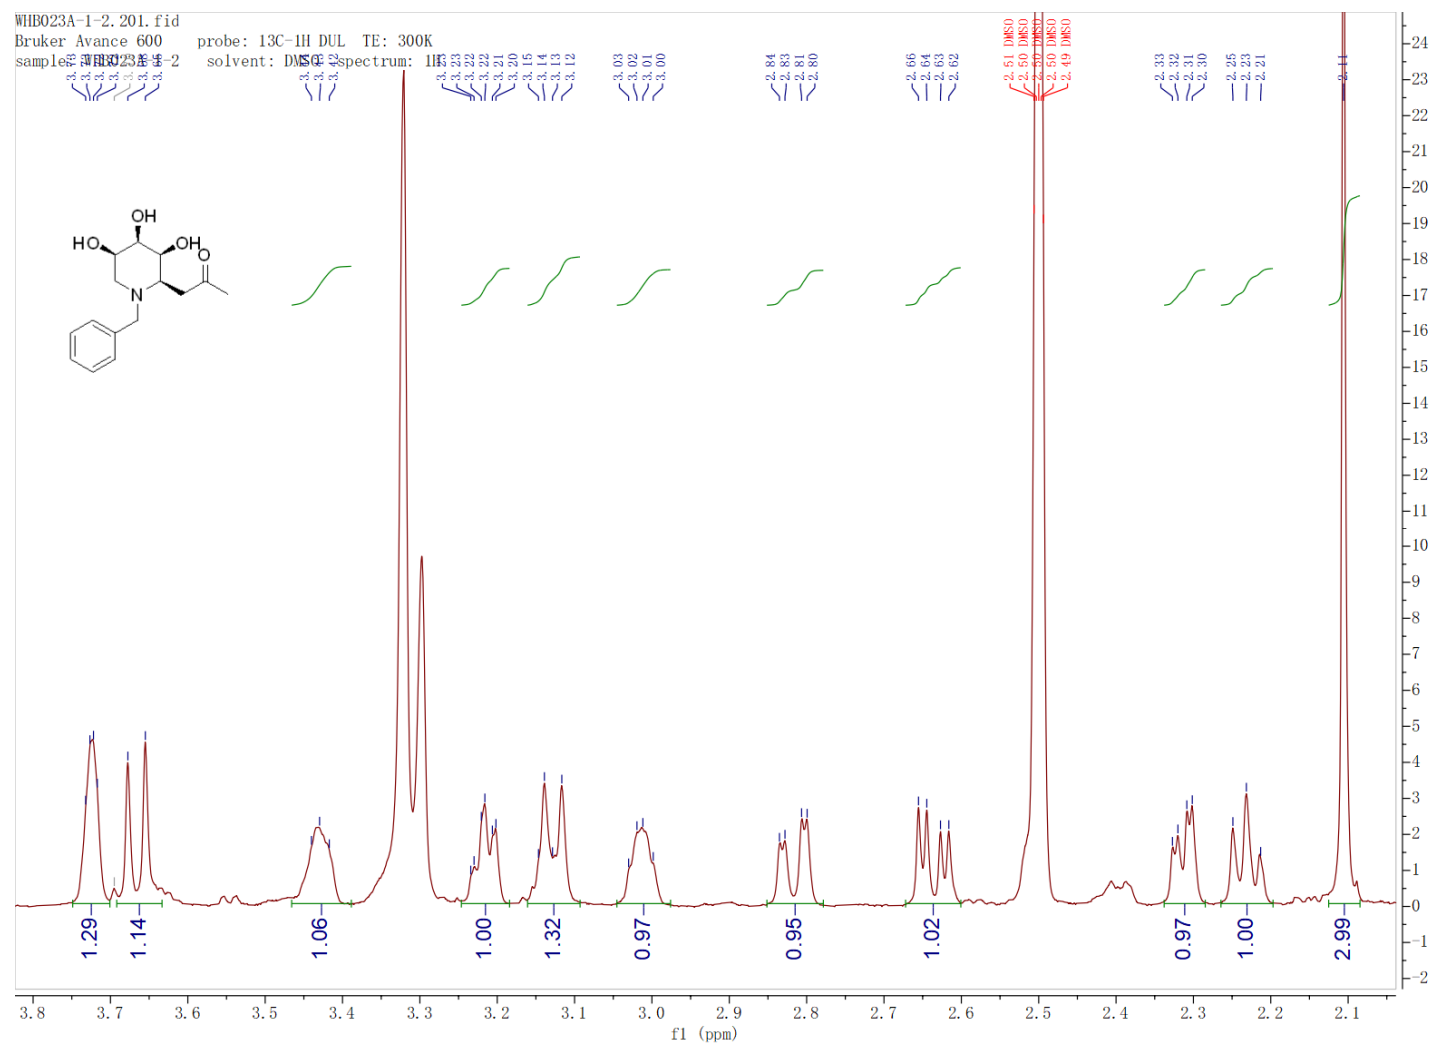

**Figure S14.** Partial region amplification of the  $^1\text{H}$  NMR of compound **5d**.

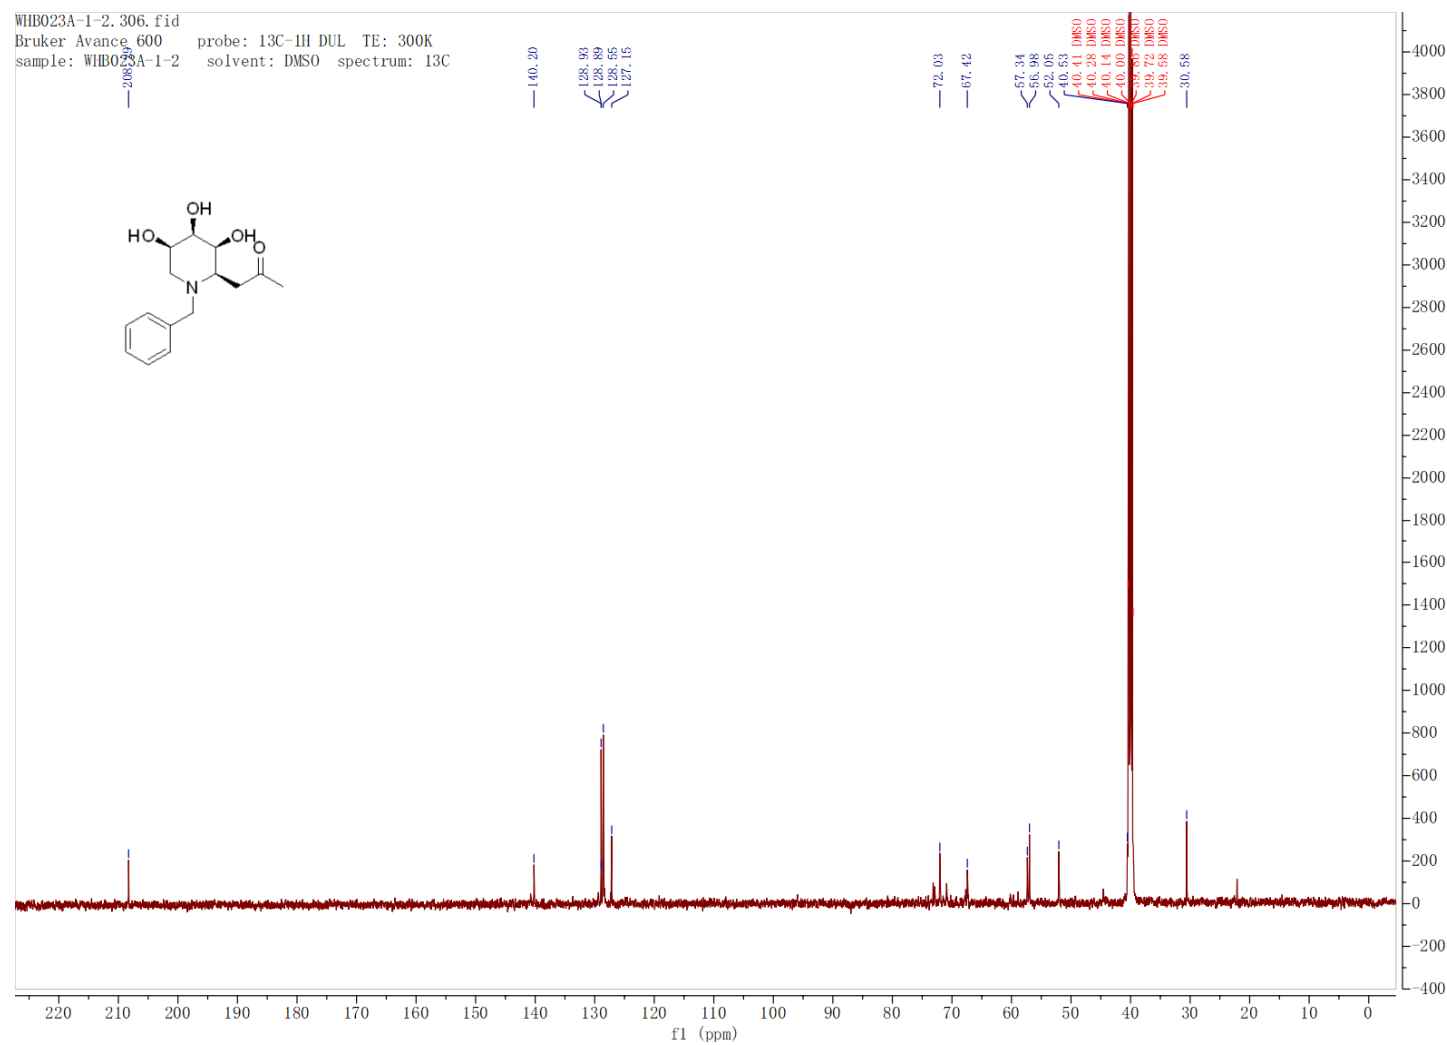

Figure S15. The  $^{13}\text{C}$  NMR of compound 5d.

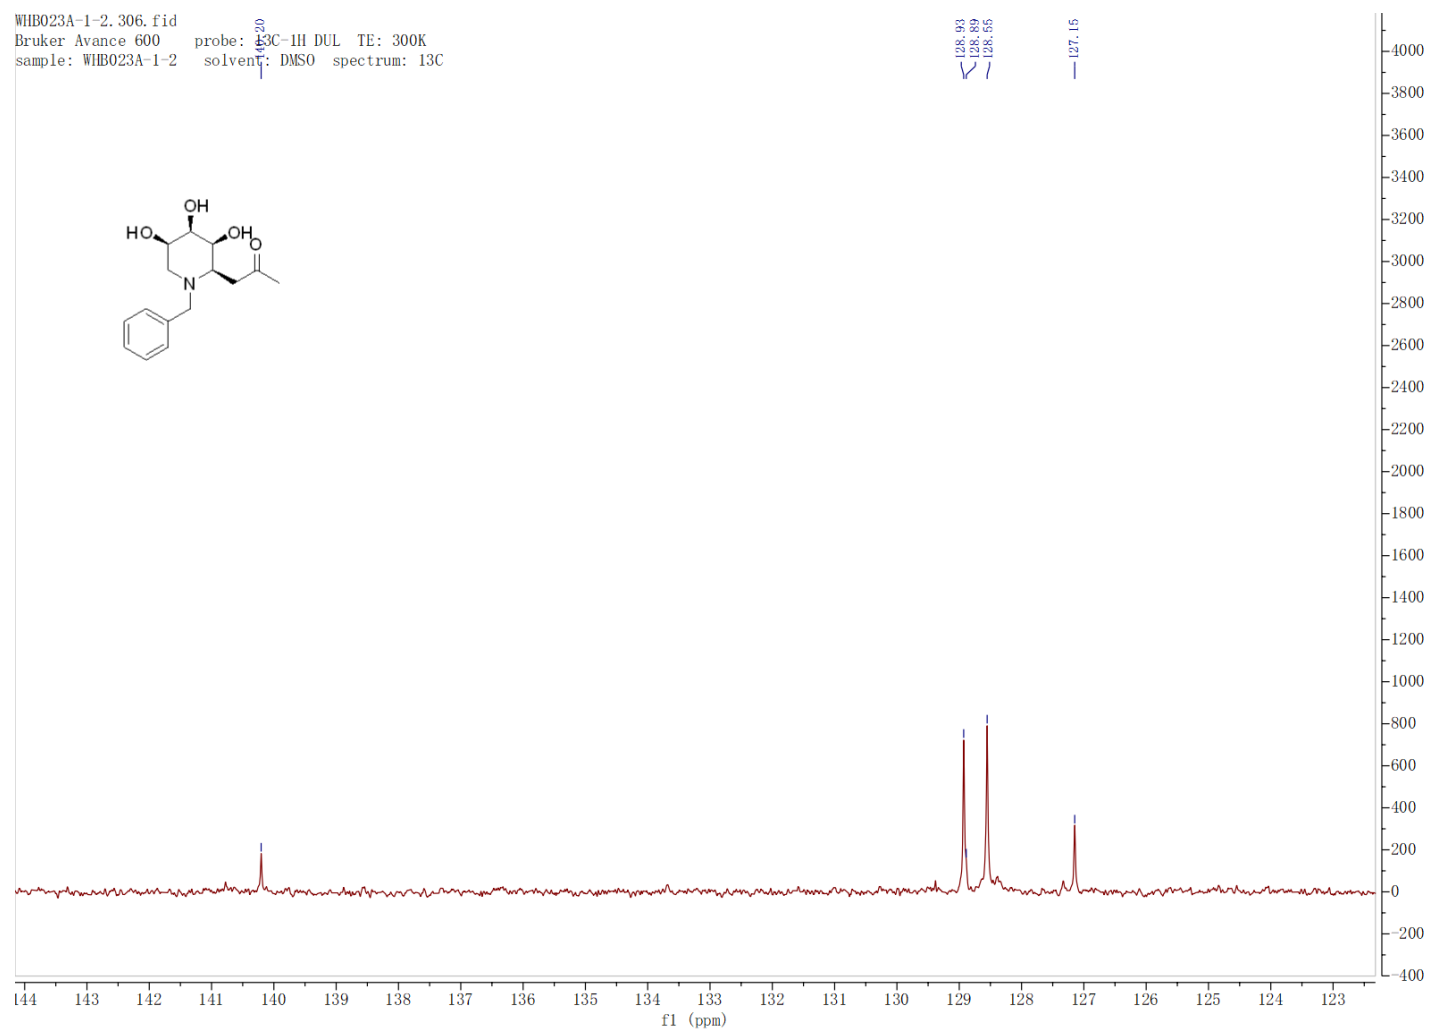

**Figure S16.** Partial region amplification of the  $^{13}\text{C}$  NMR of compound **5d**.

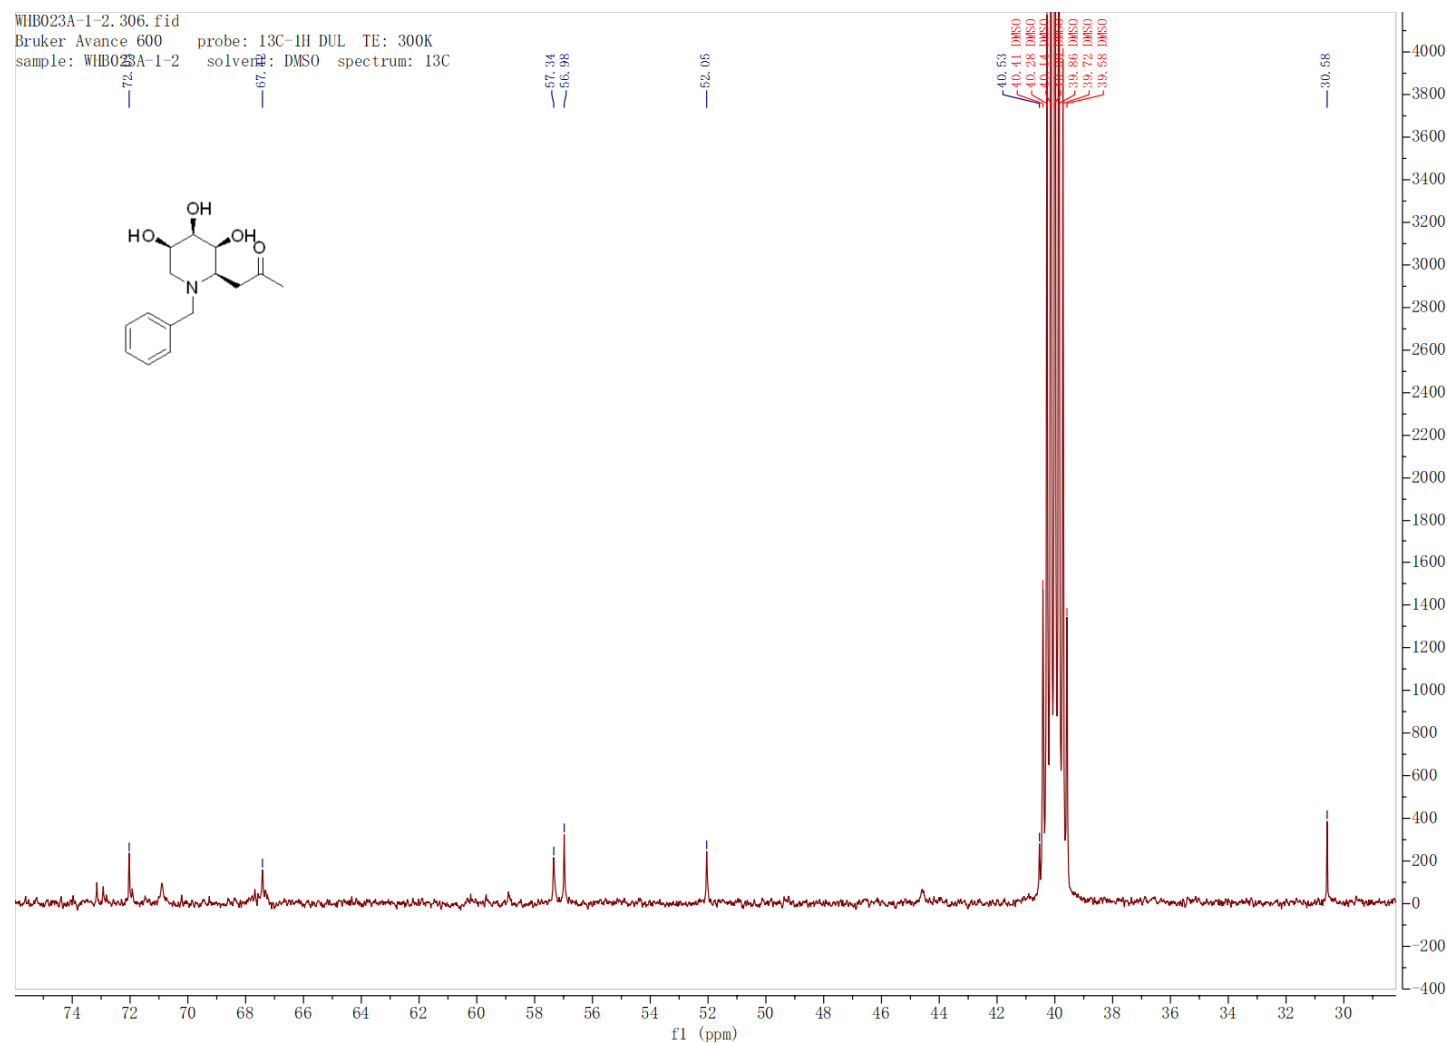

Figure S17. Partial region amplification of the  $^{13}\text{C}$  NMR of compound **5d**.

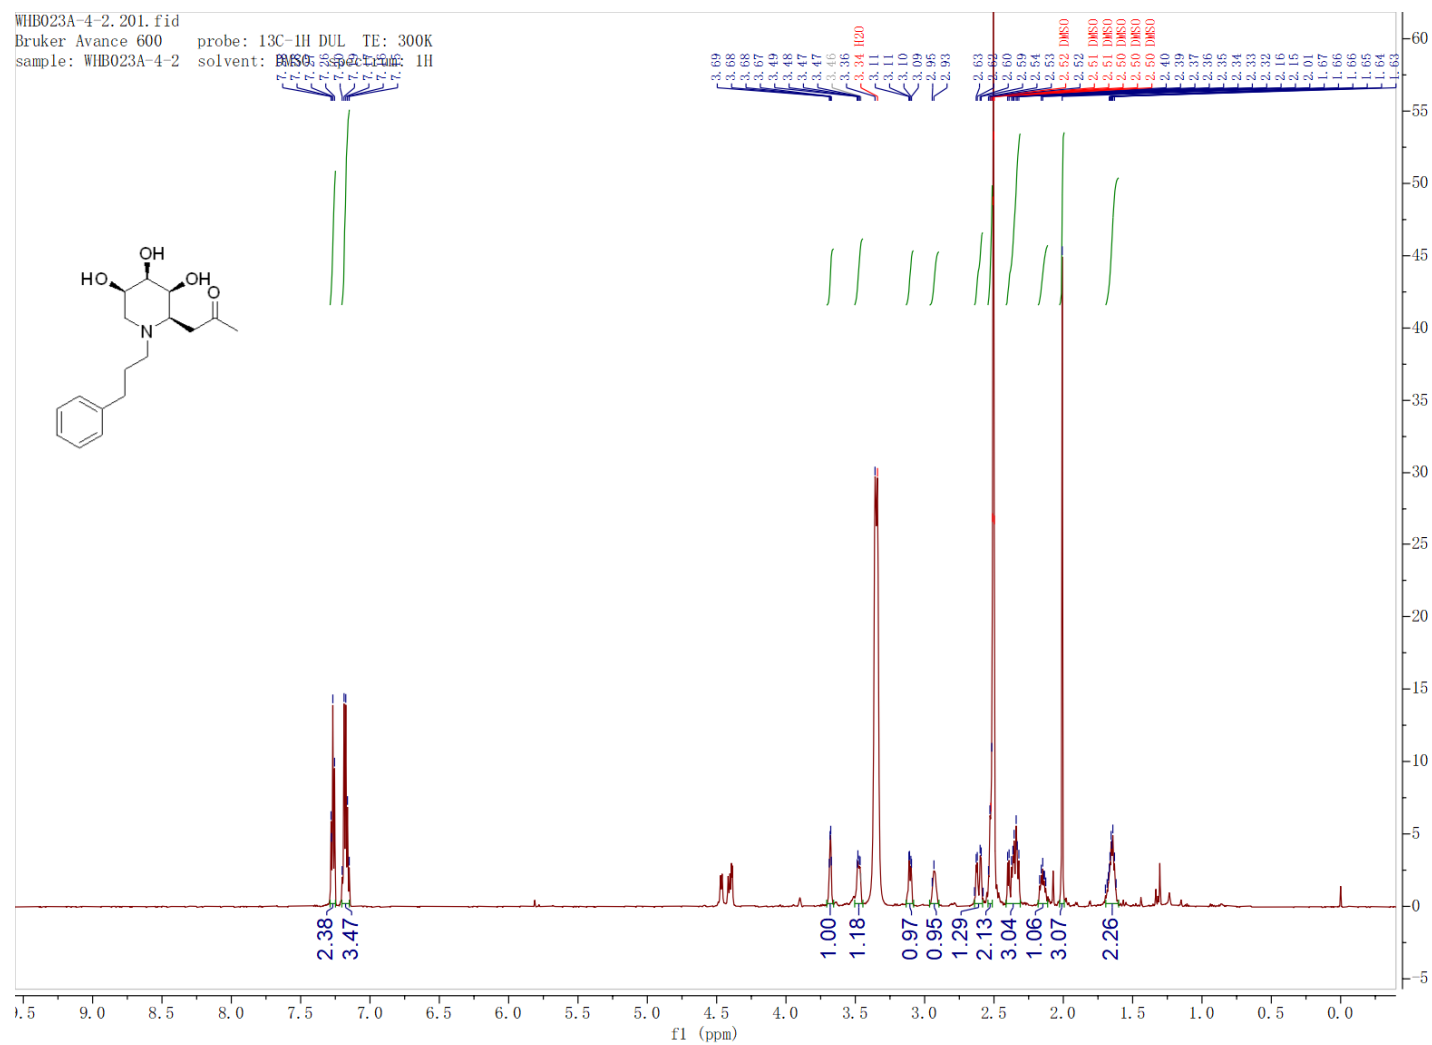

Figure S18. The  $^1\text{H}$  NMR of compound 5e.

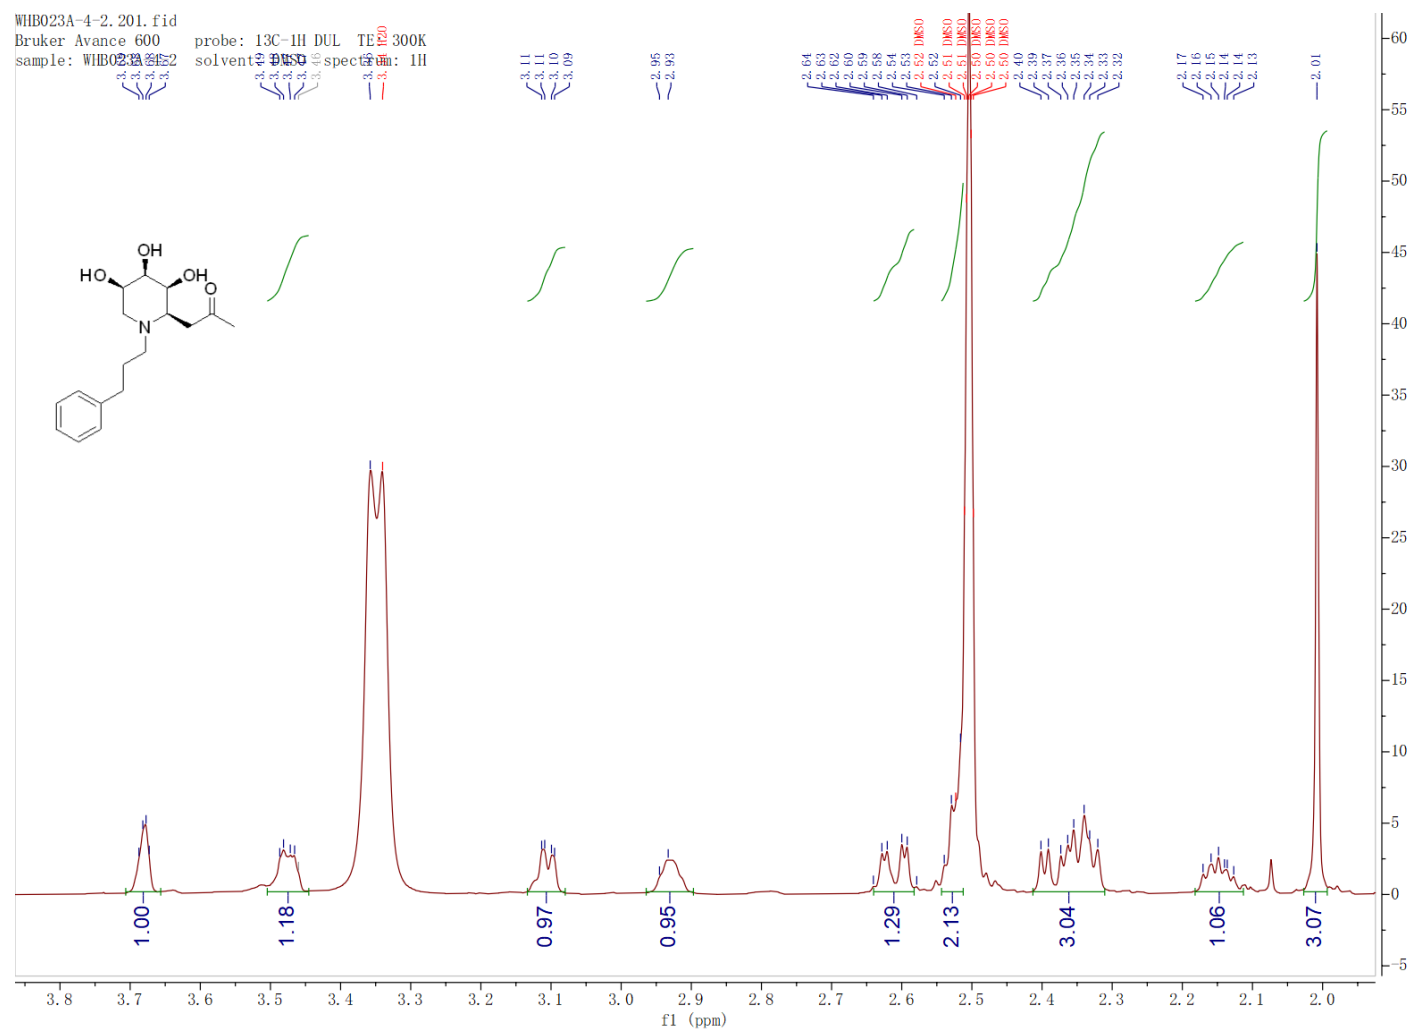

**Figure S19.** Partial region amplification of the  $^1\text{H}$  NMR of compound **5e**.



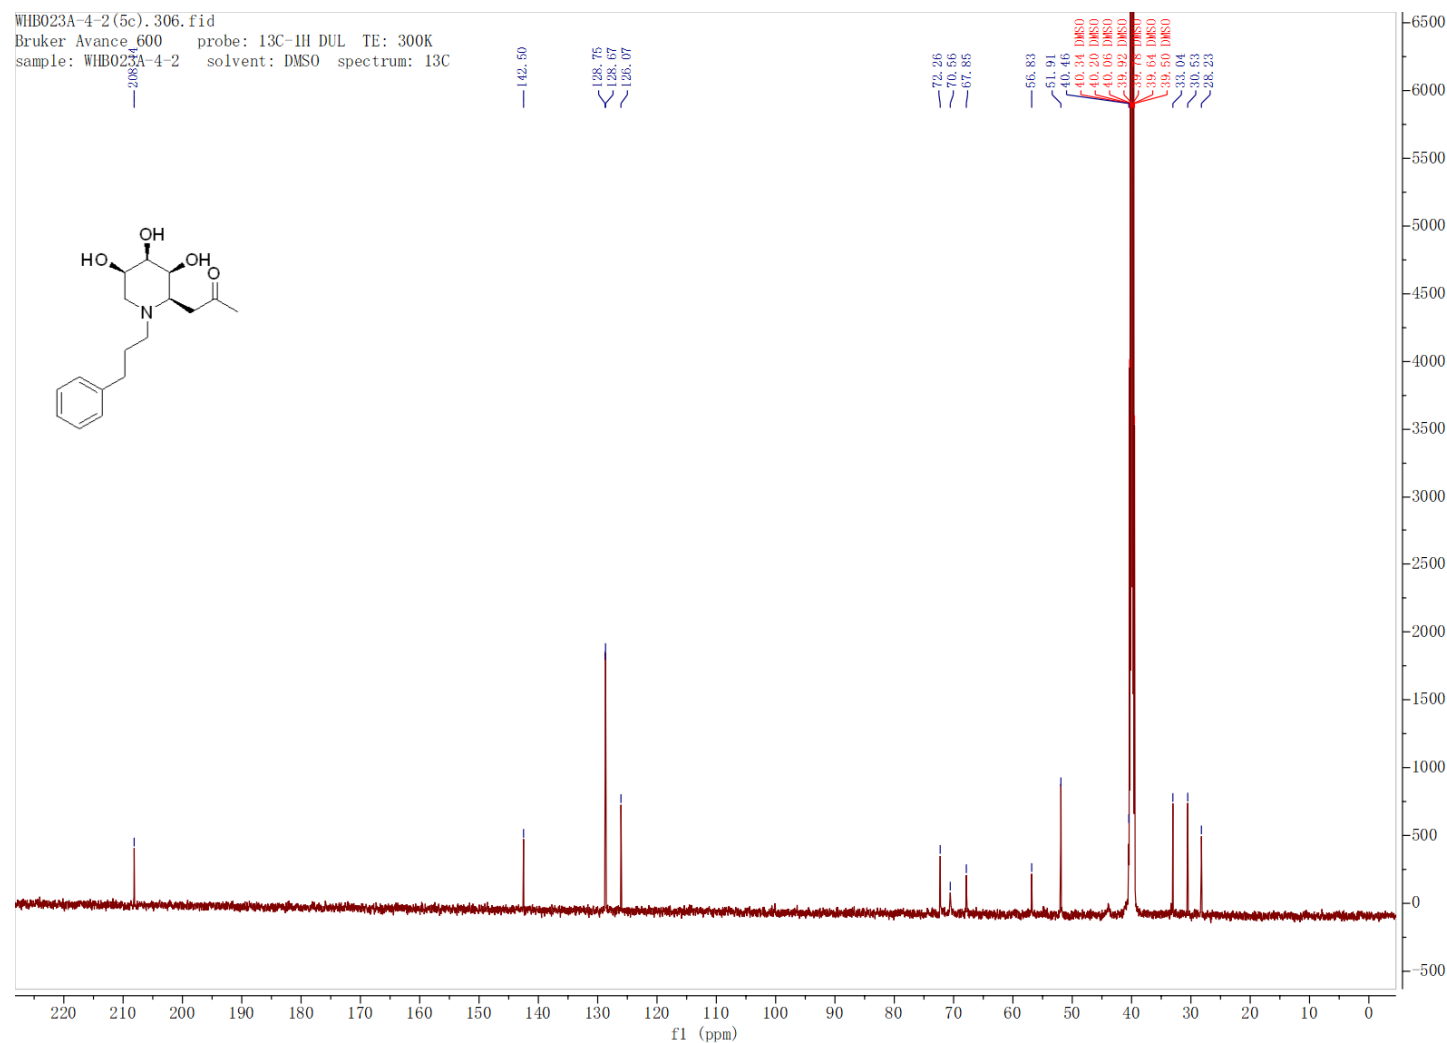

Figure S20. The  $^{13}\text{C}$  NMR of compound 5e.

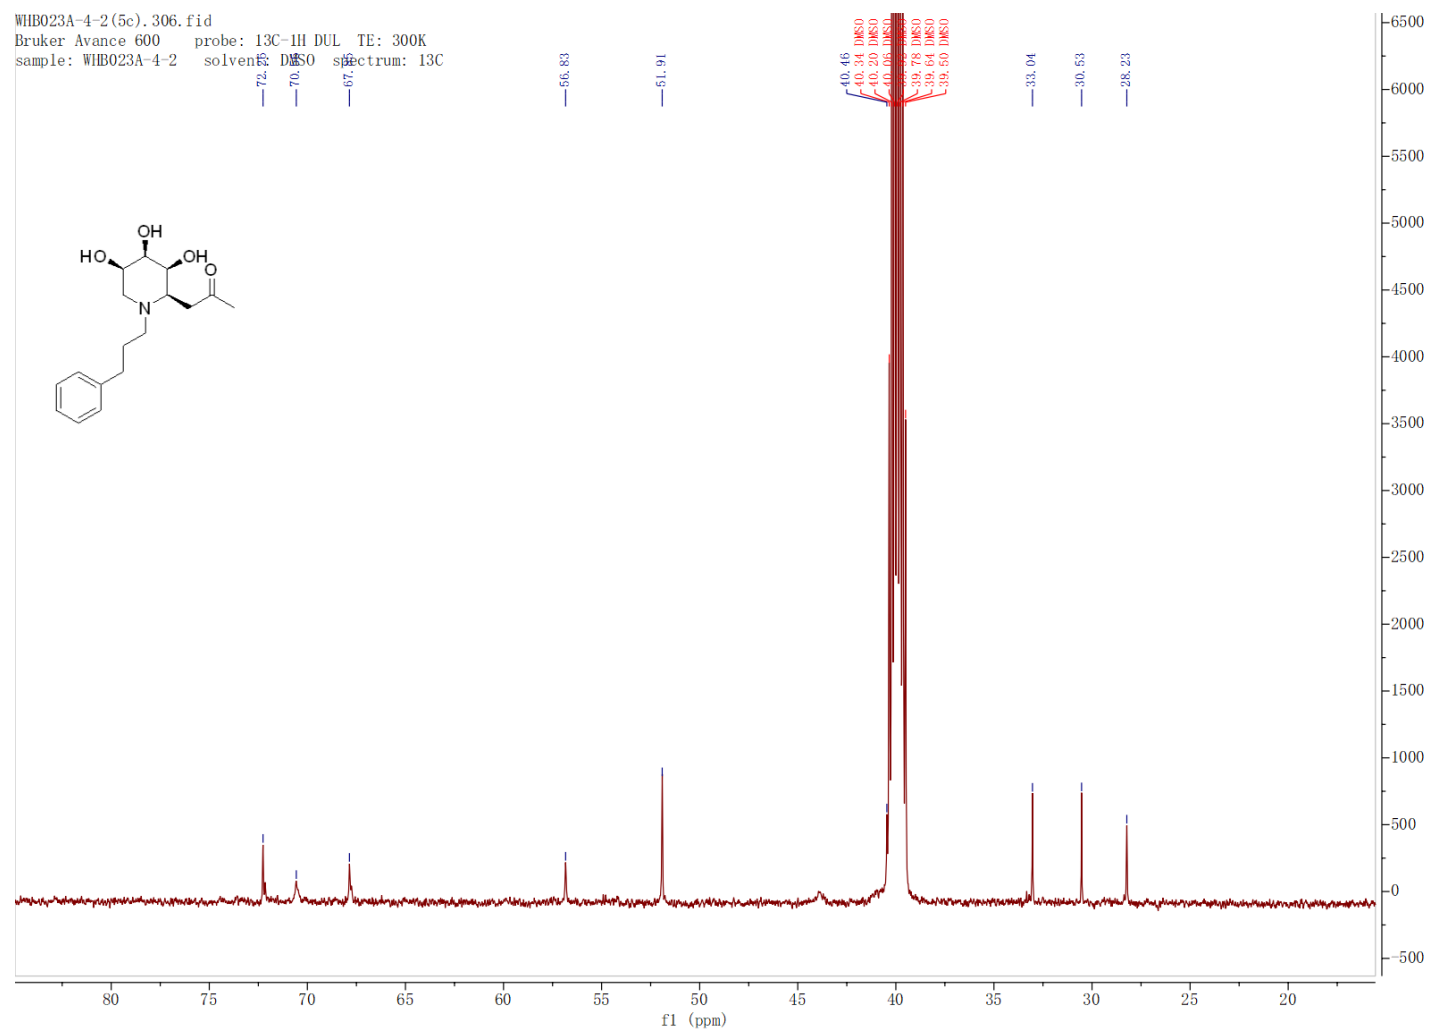

**Figure S21.** Partial region amplification of the  $^{13}\text{C}$  NMR of compound **5e**.

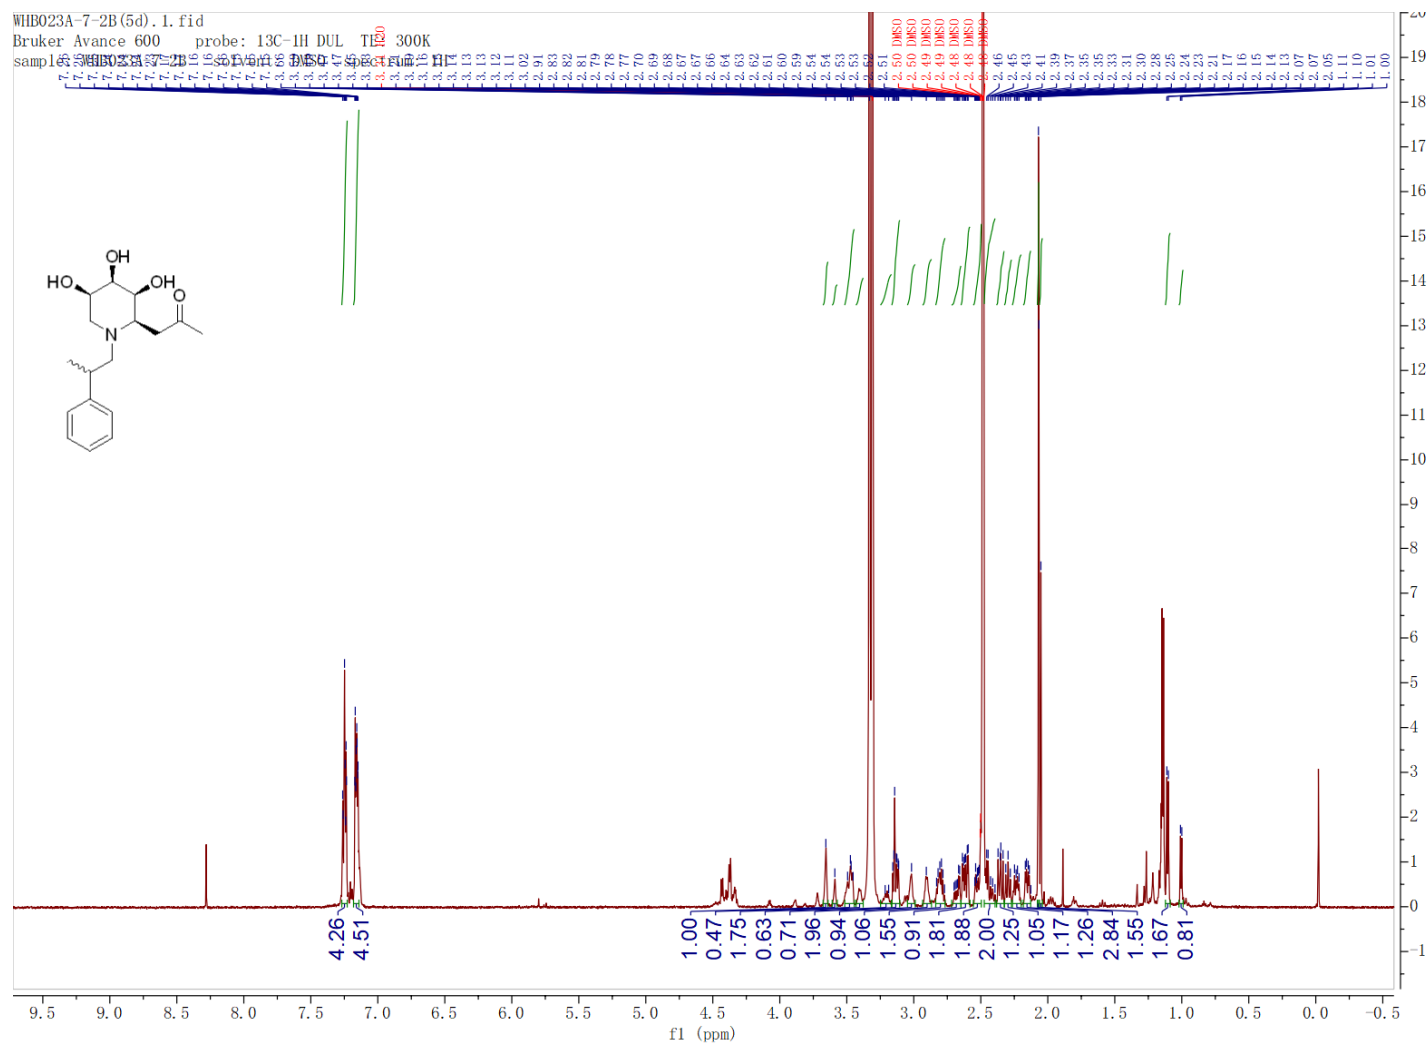

Figure S22. The  $^1\text{H}$  NMR of compound 5f.

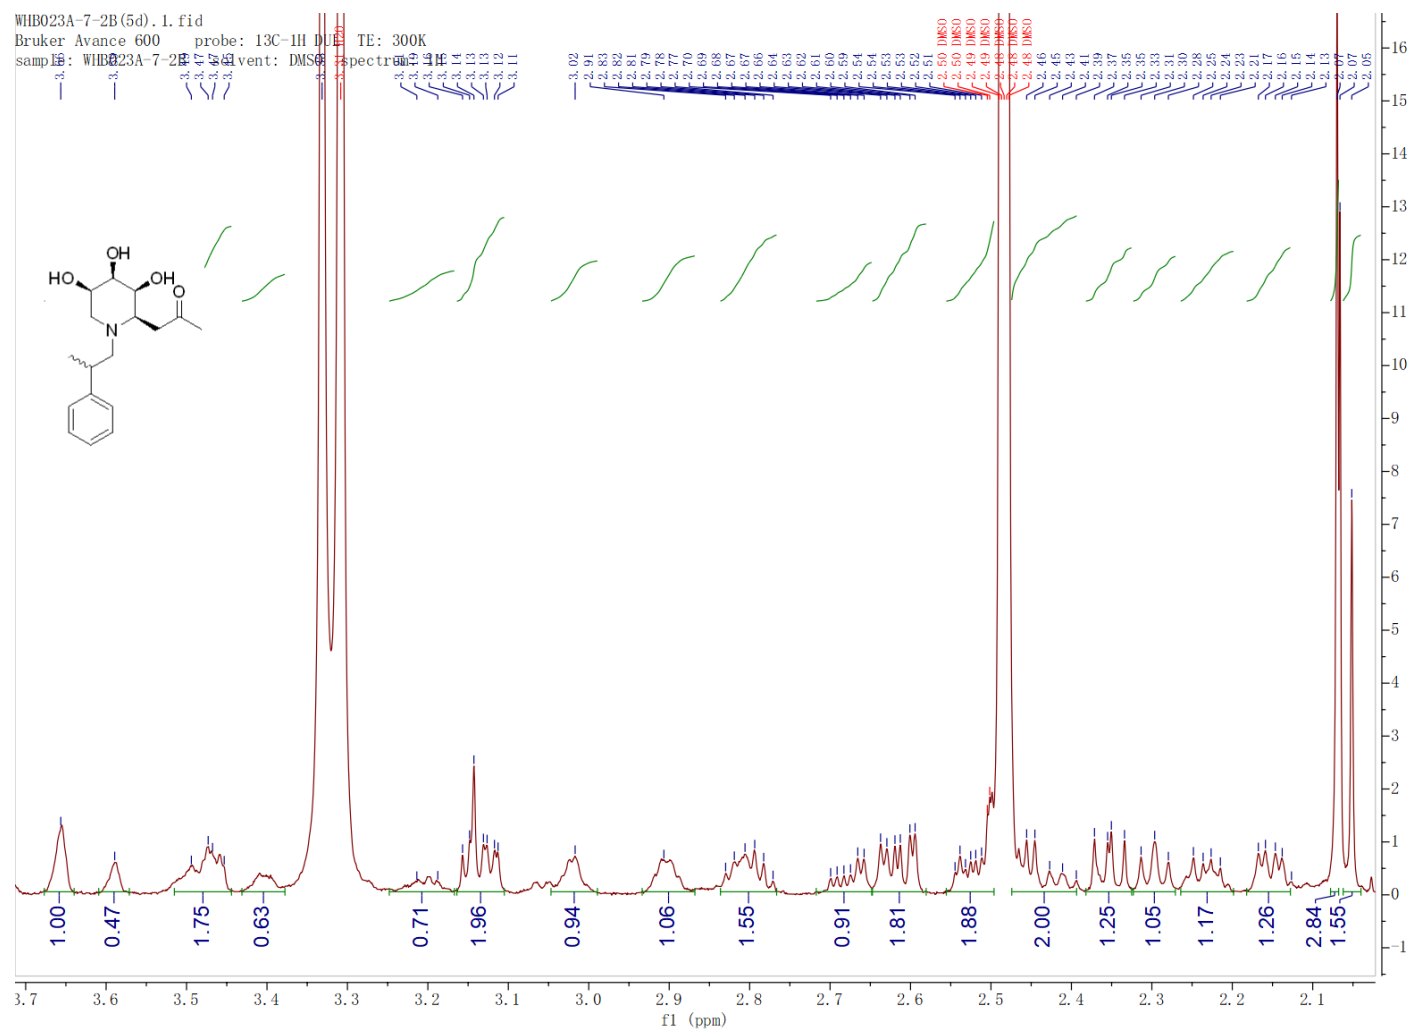

Figure S23. Partial region amplification of the  $^1\text{H}$  NMR of compound 5f.

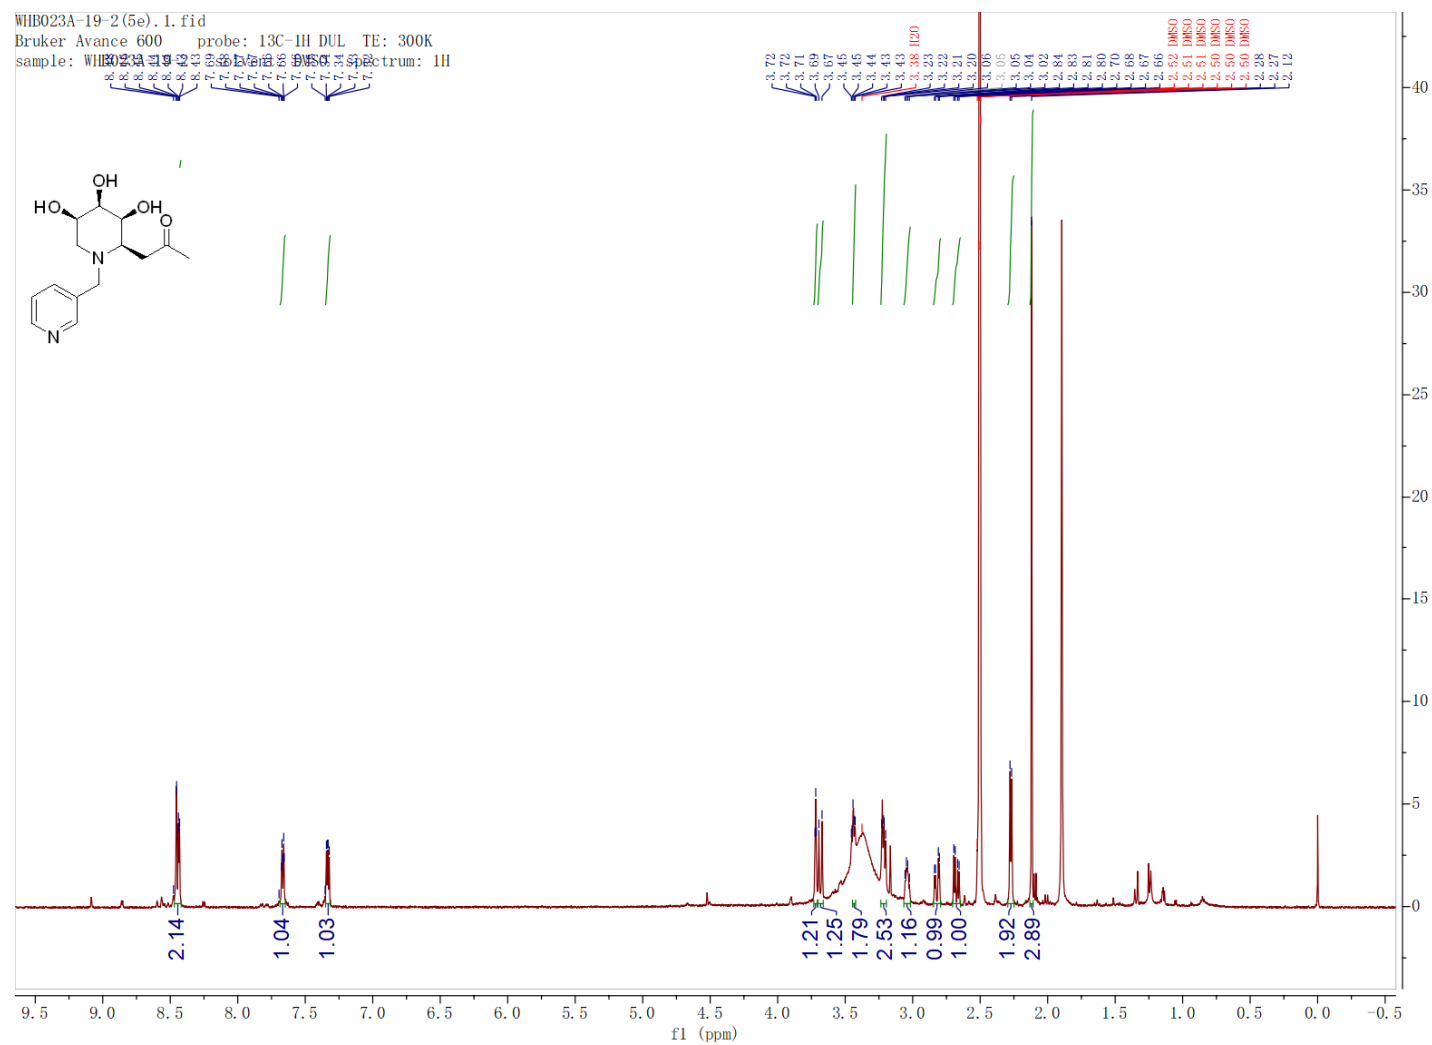

Figure S24. The  $^1\text{H}$  NMR of compound 5g.

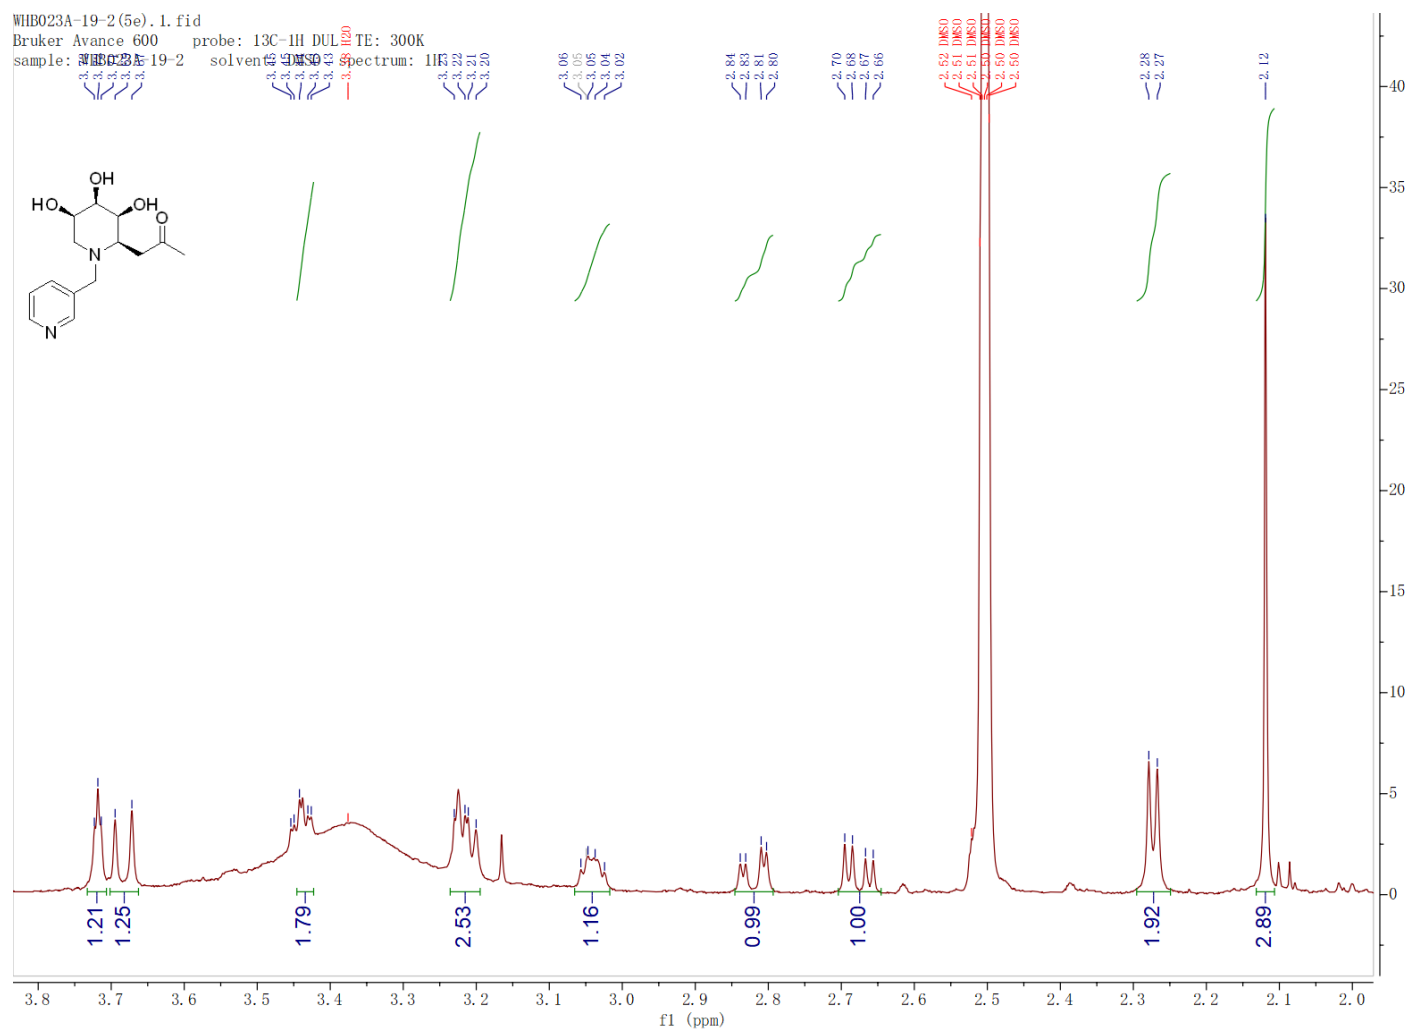

Figure S25. Partial region amplification of the  $^1\text{H}$  NMR of compound **5g**.

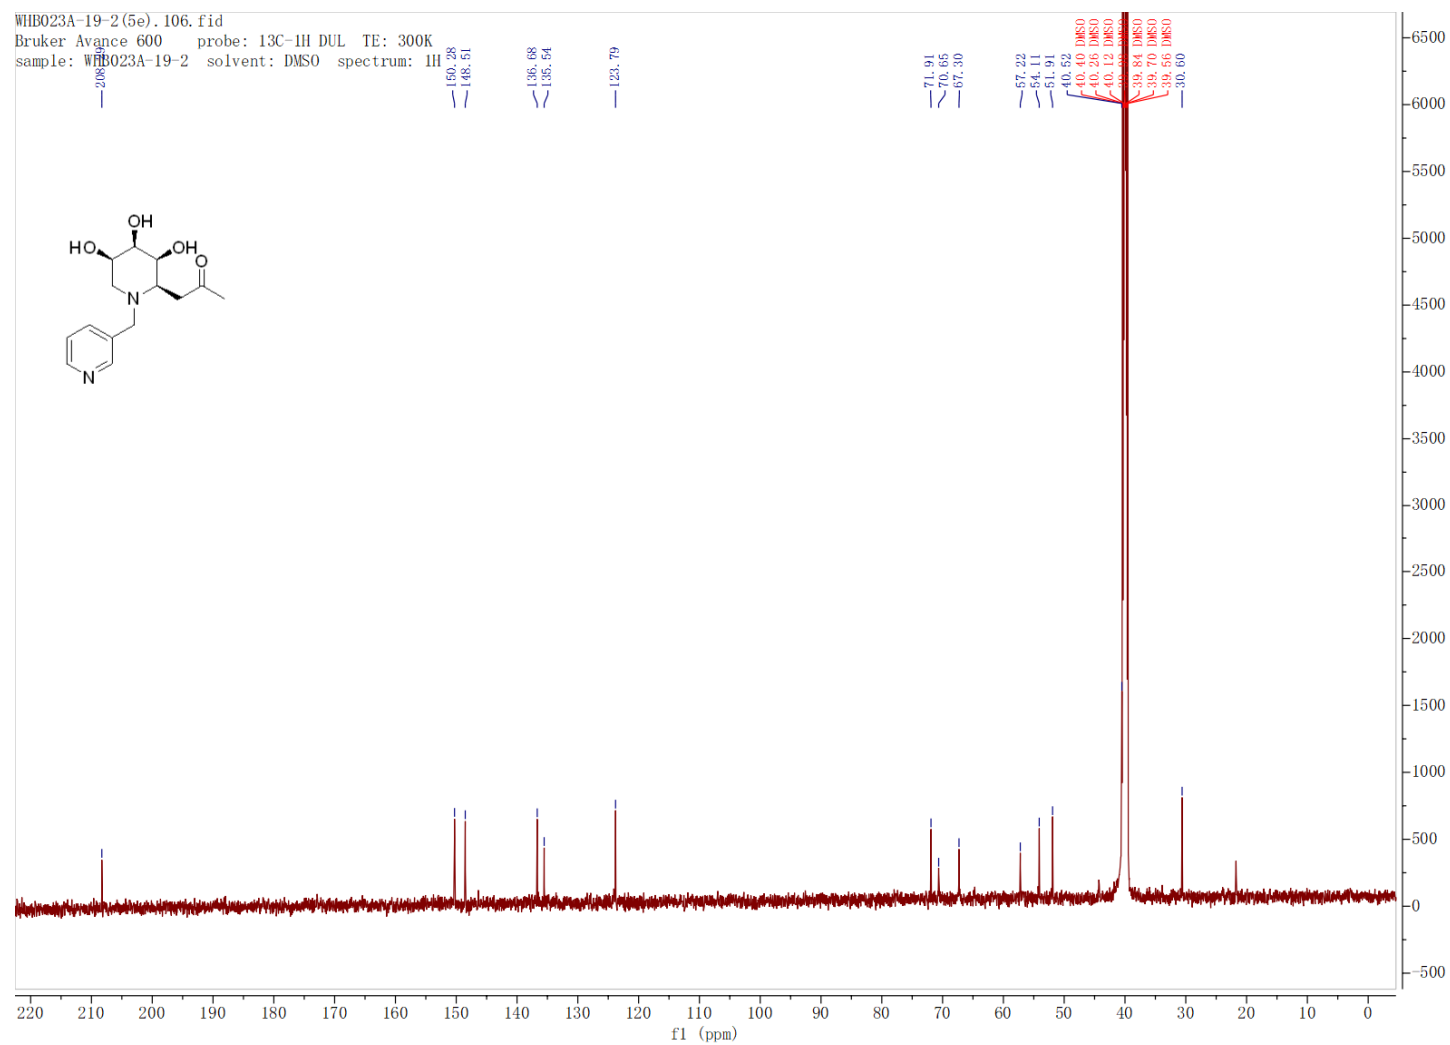

Figure S26. The  $^{13}\text{C}$  NMR of compound 5g.

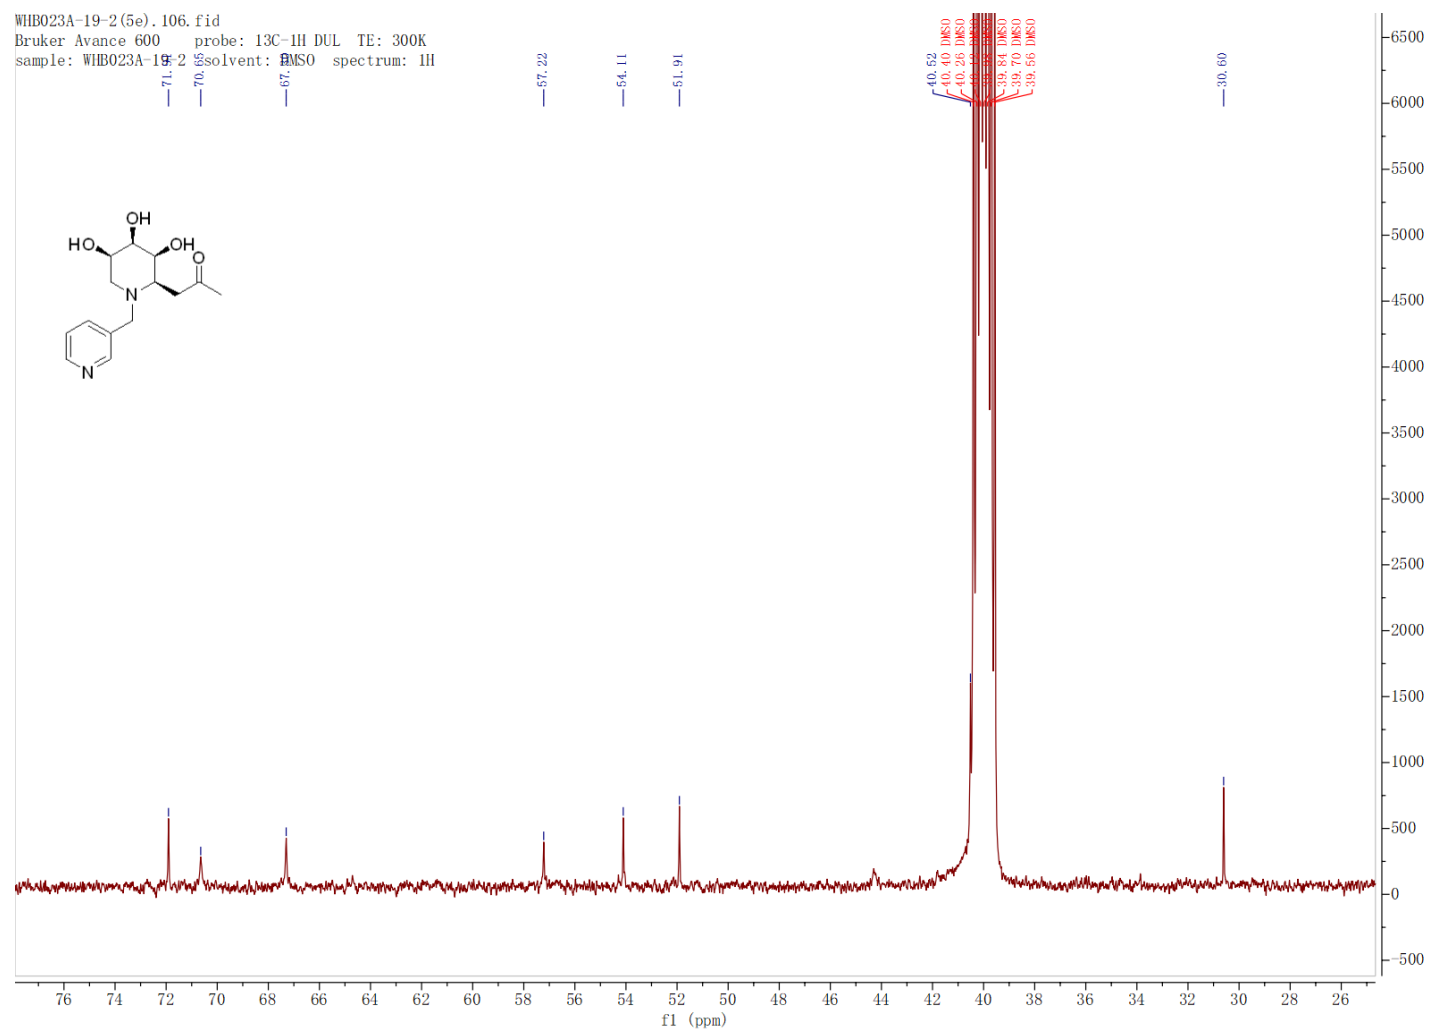

**Figure S27.** Partial region amplification of the  $^{13}\text{C}$  NMR of compound **5g**.



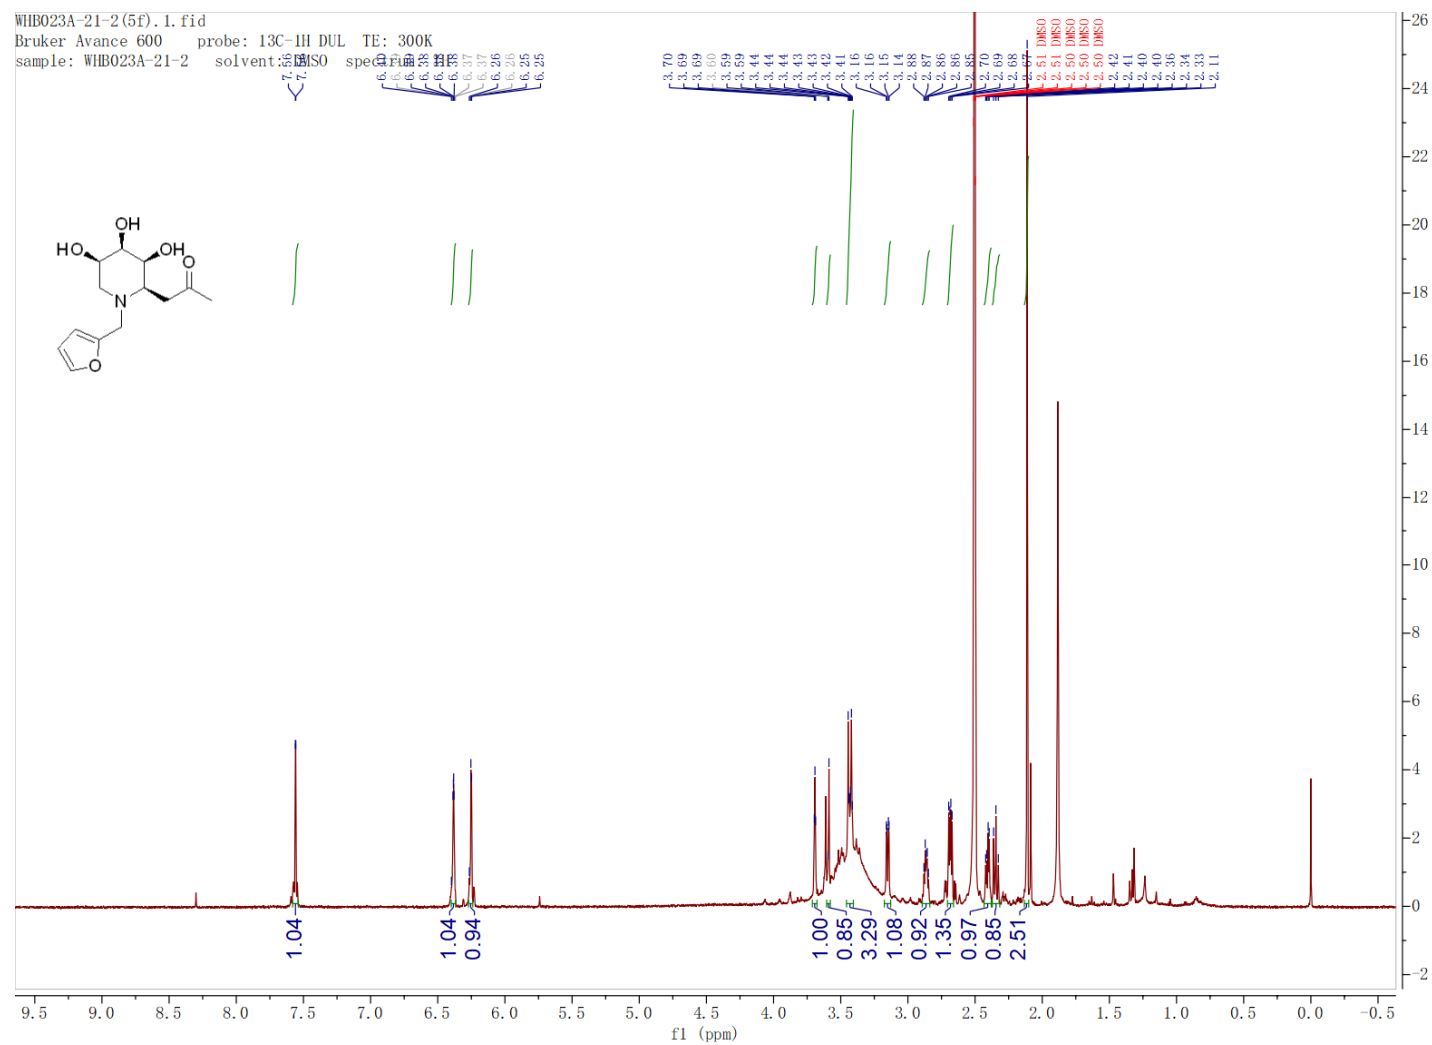

Figure S28. The  $^1\text{H}$  NMR of compound 5h.

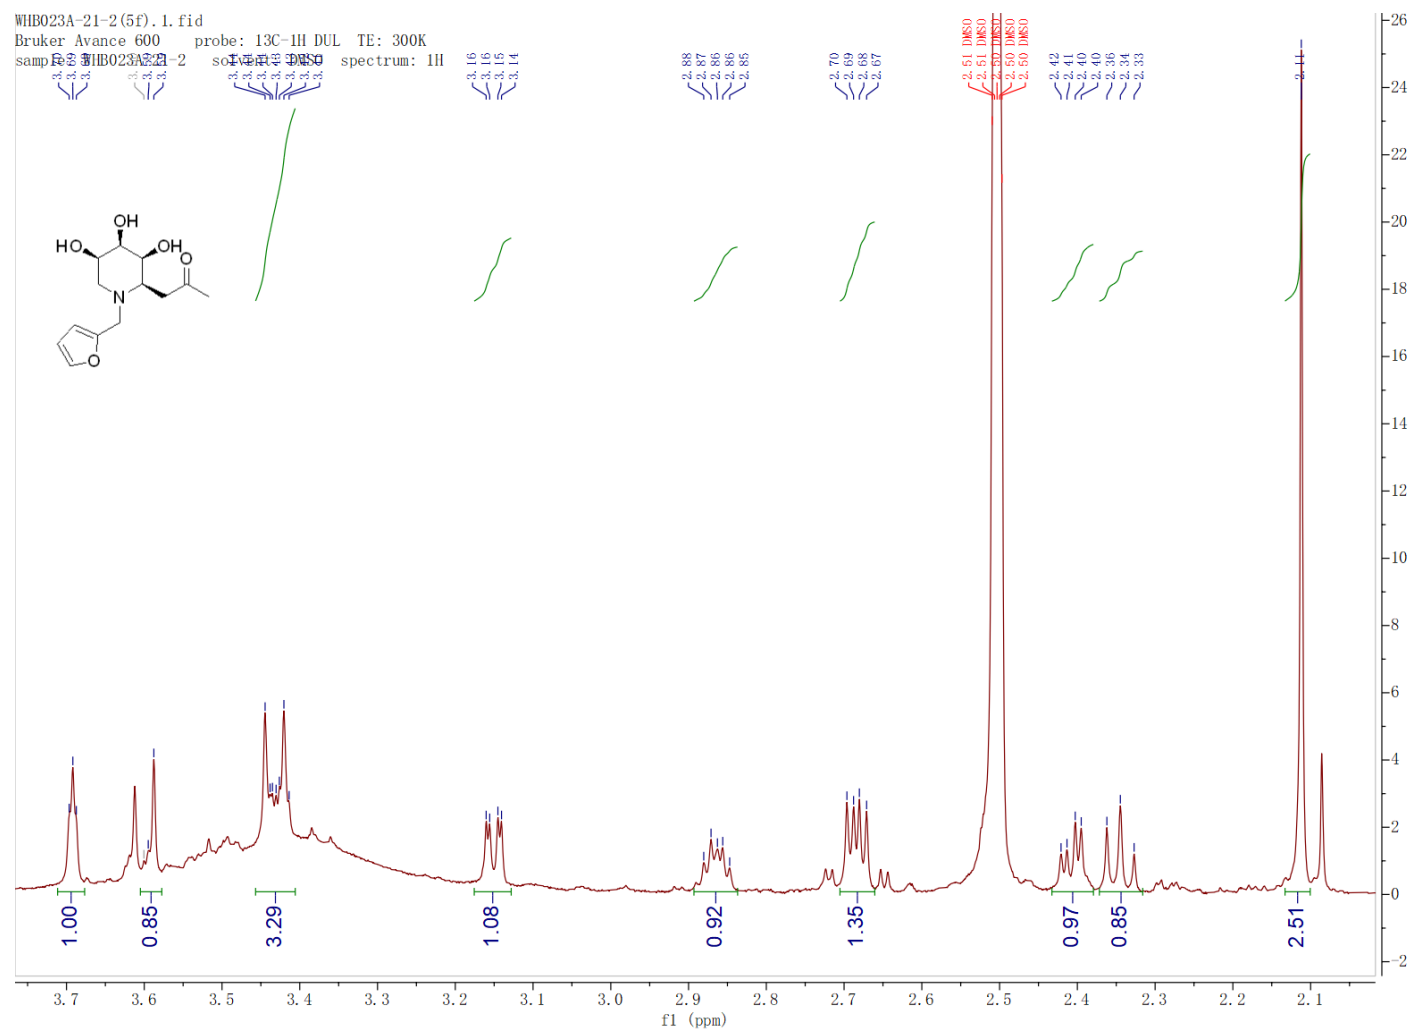

**Figure S29.** Partial region amplification of the  $^1\text{H}$  NMR of compound **5h**.

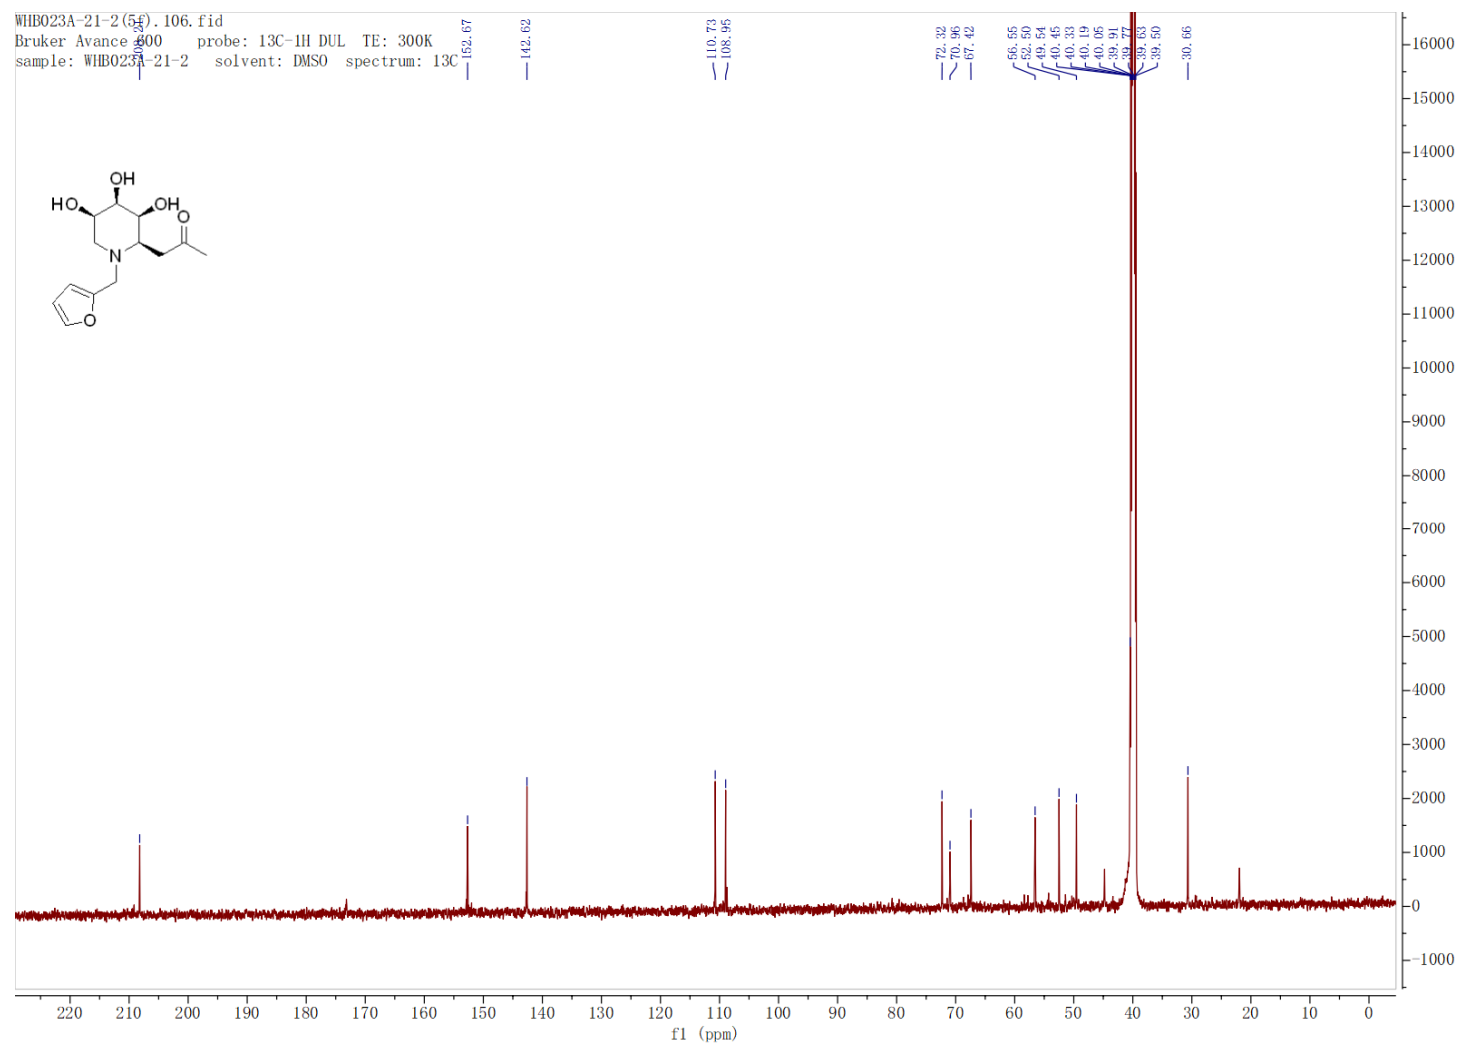

Figure S30. The  $^{13}\text{C}$  NMR of compound 5h.

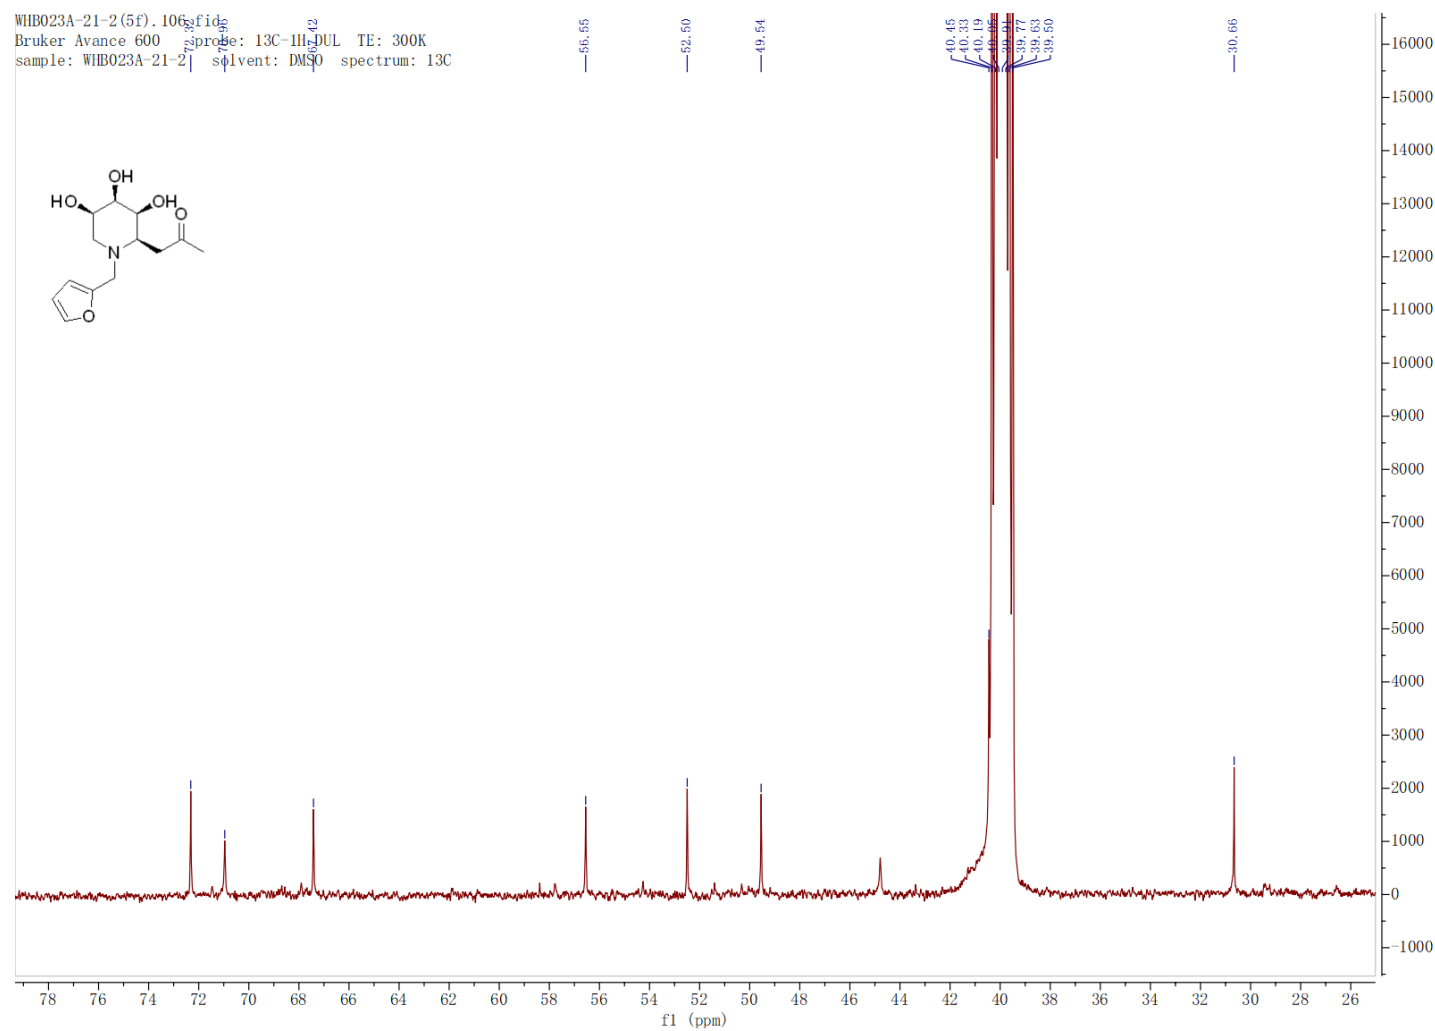

**Figure S31.** Partial region amplification of the  $^{13}\text{C}$  NMR of compound **5h**.

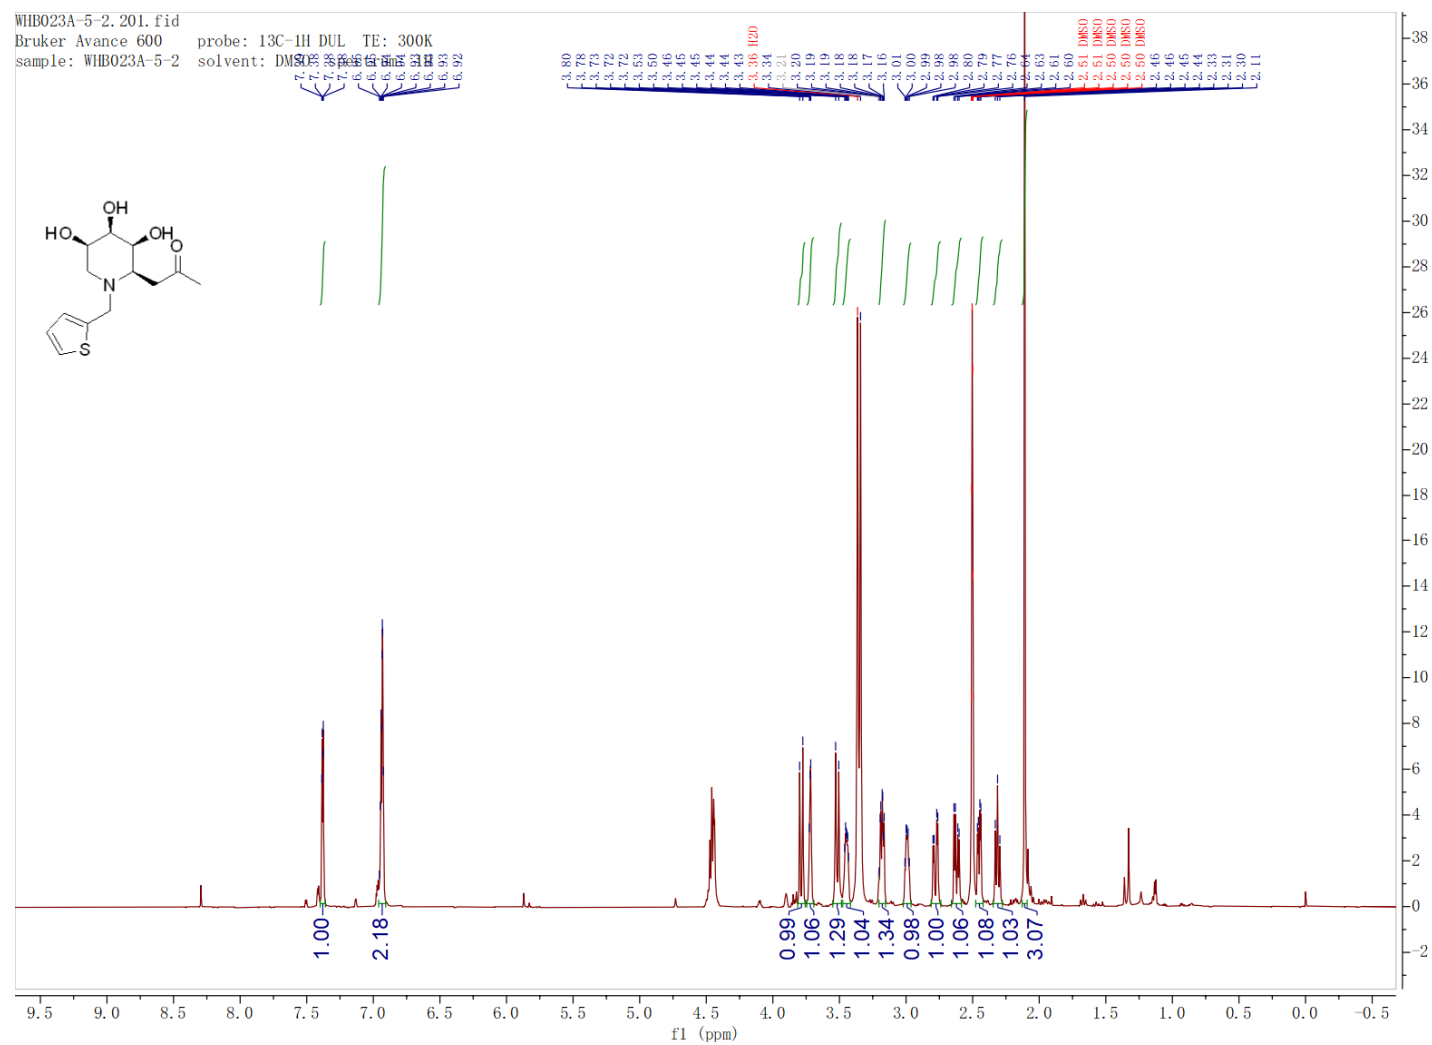

Figure S32. The  $^1\text{H}$  NMR of compound 5i.

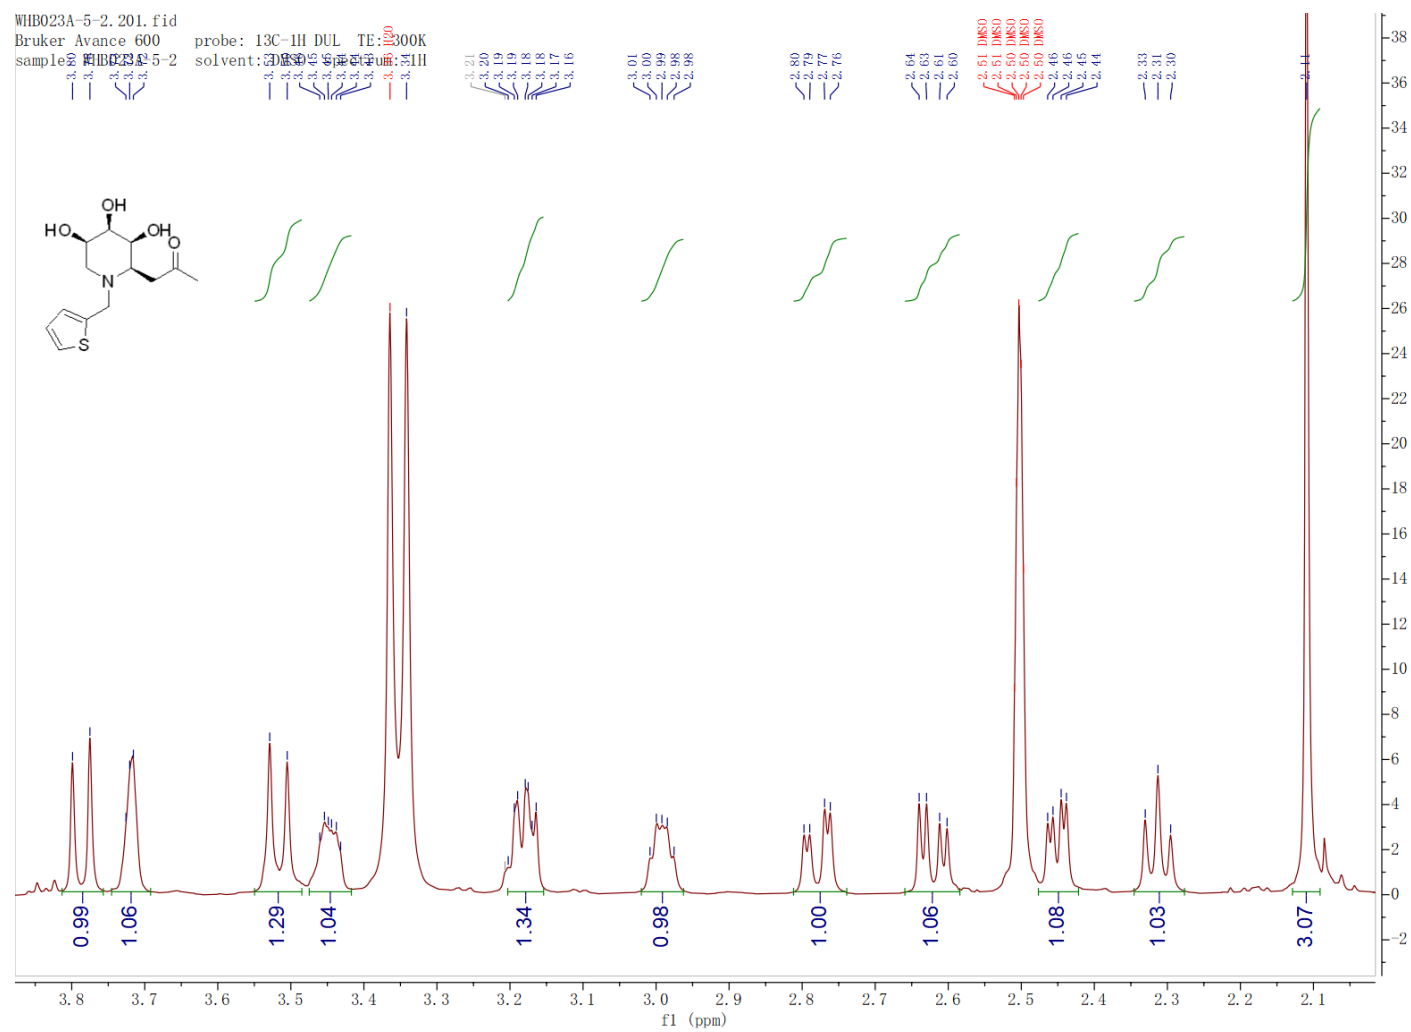

**Figure S33.** Partial region amplification of the  $^1\text{H}$  NMR of compound **5i**.

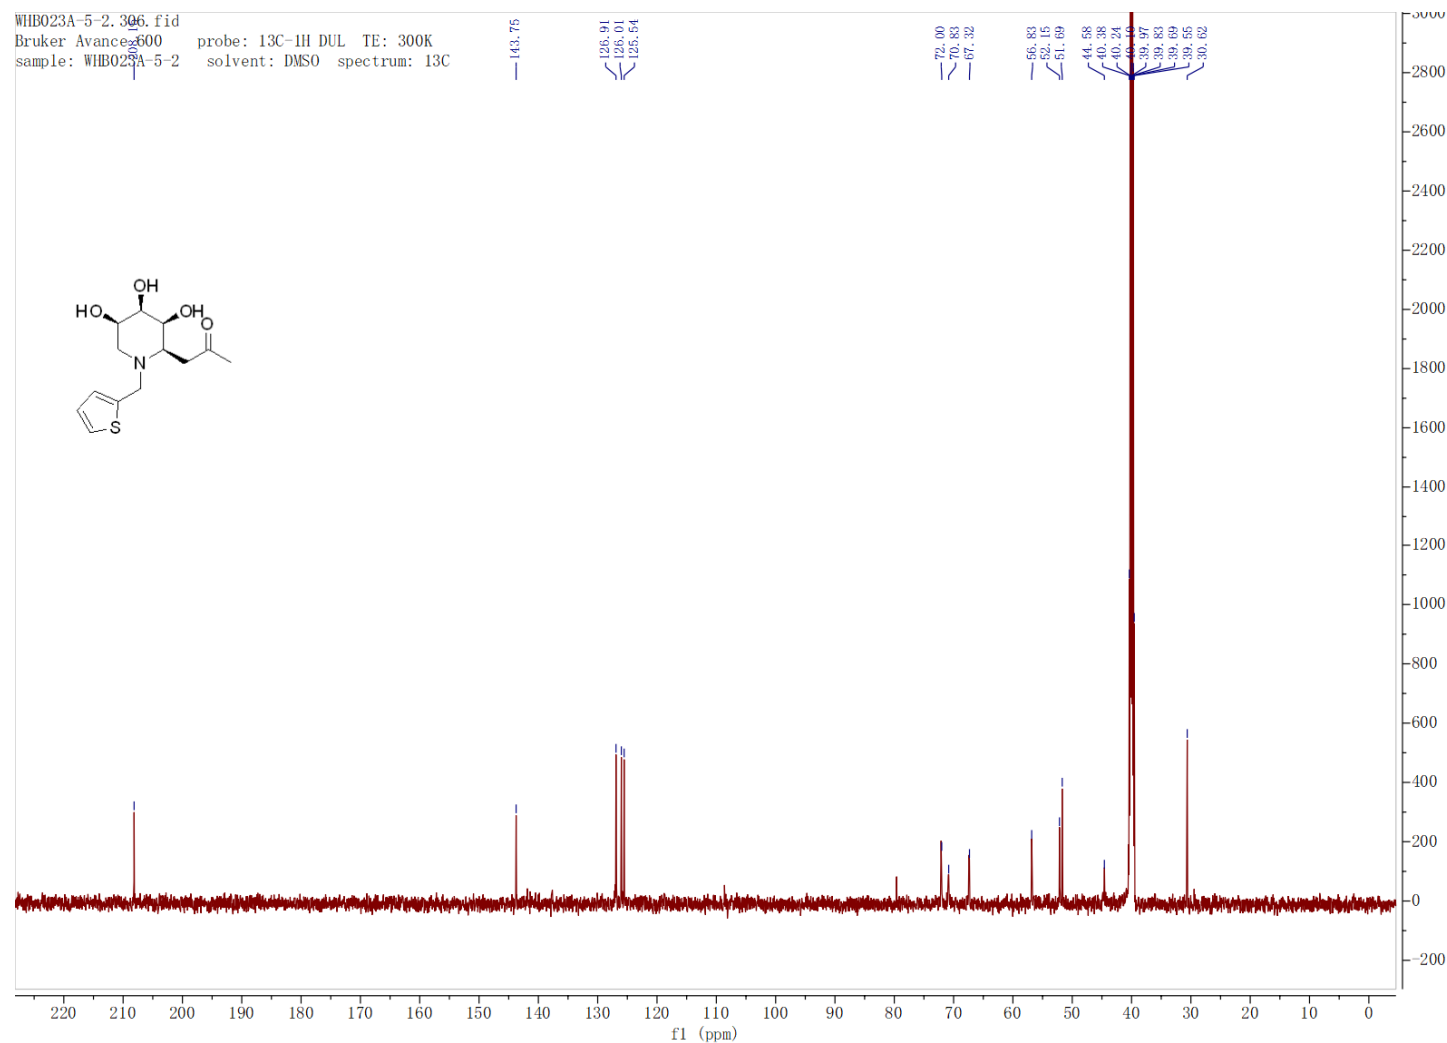

Figure S34. The  $^{13}\text{C}$  NMR of compound **5i**.

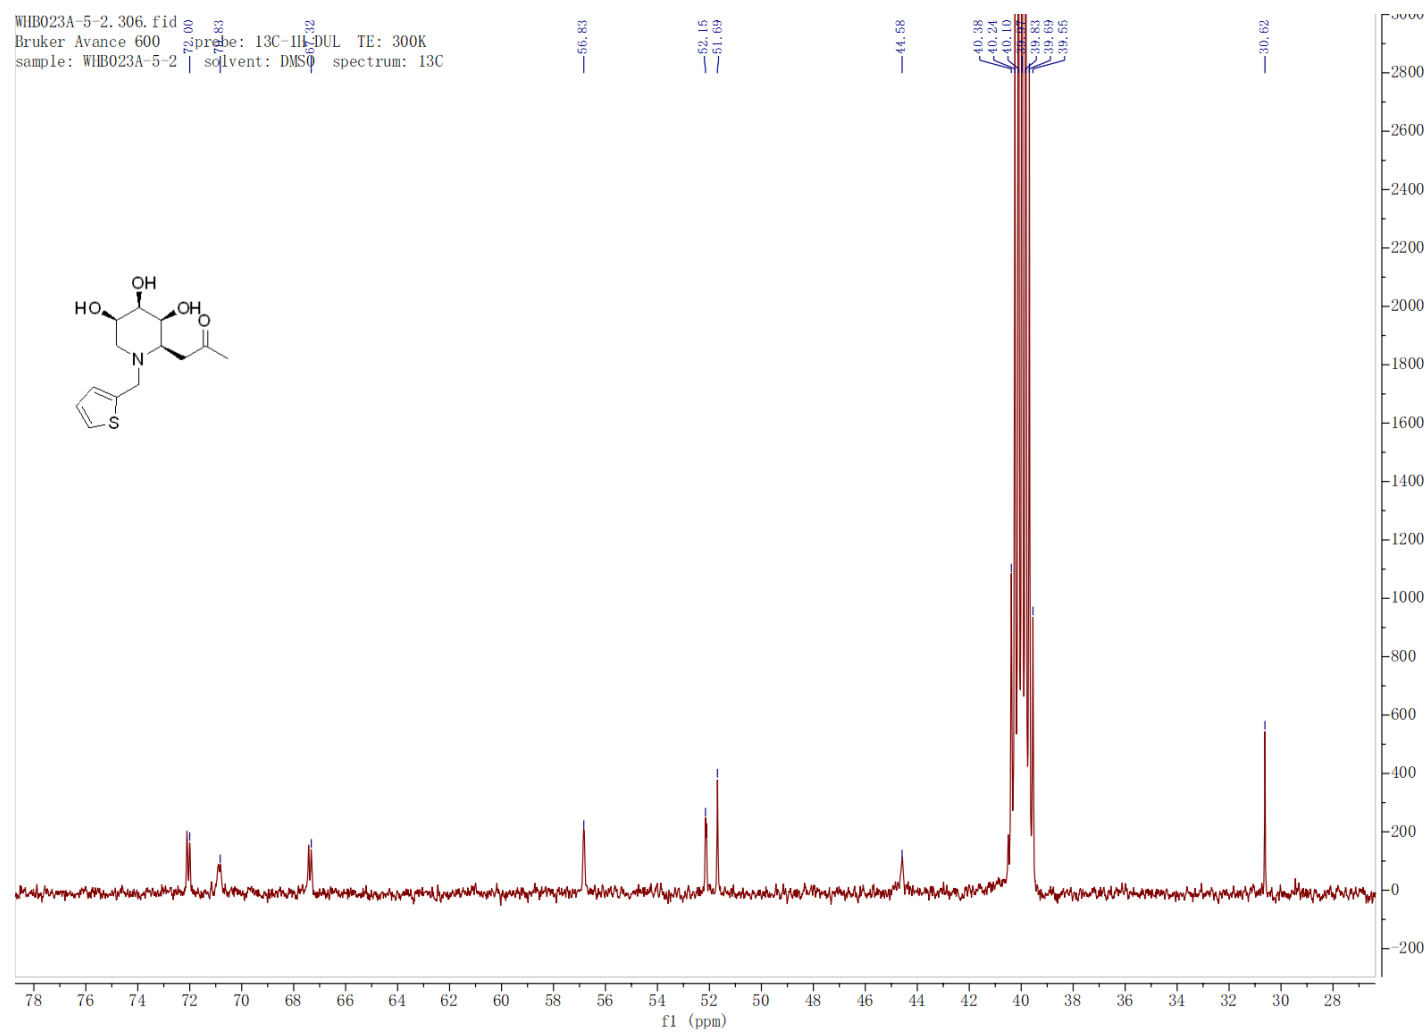

Figure S35. Partial region amplification of the  $^{13}\text{C}$  NMR of compound **5i**.





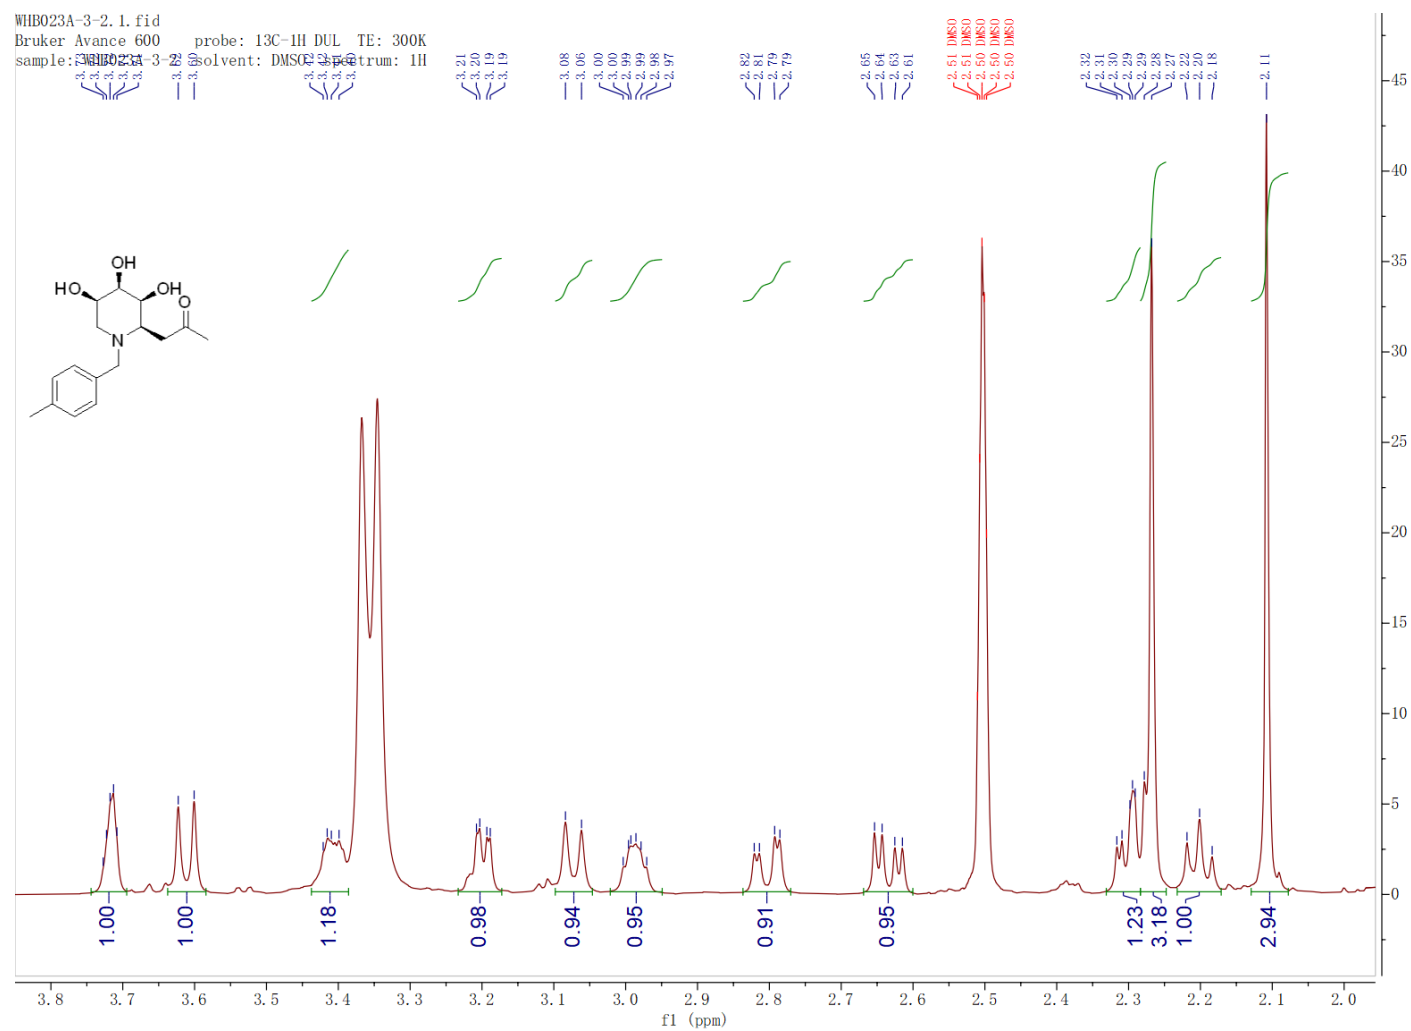

Figure S37. Partial region amplification of the  $^1\text{H}$  NMR of compound 5j.

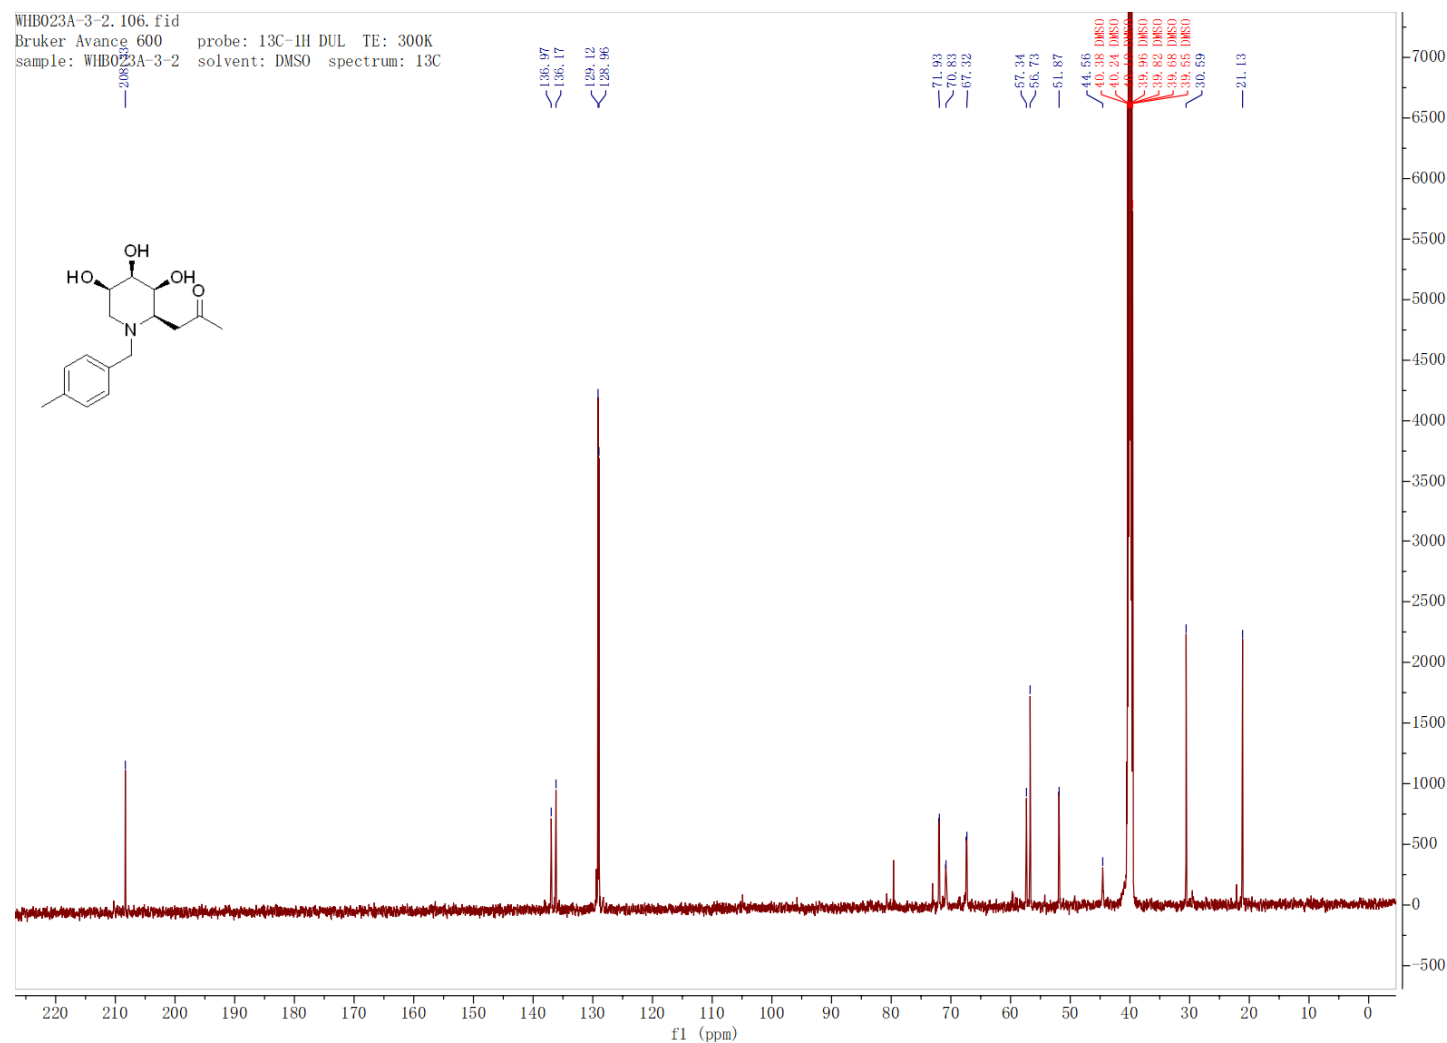

Figure S38. The  $^{13}\text{C}$  NMR of compound 5j.

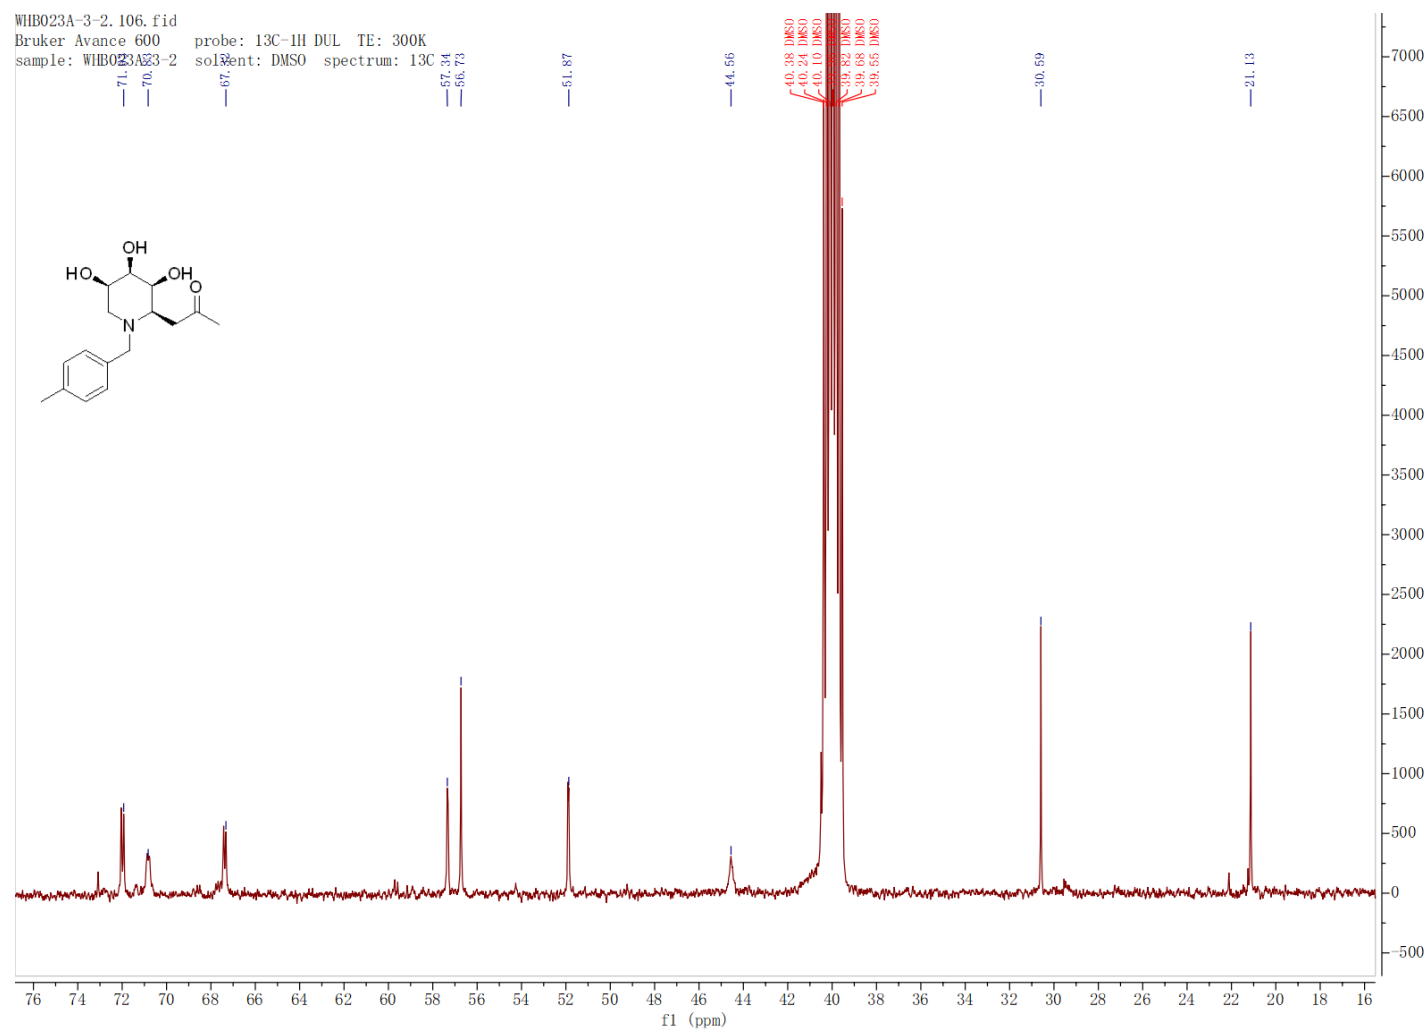

Figure S39. Partial region amplification of the  $^{13}\text{C}$  NMR of compound 5j.

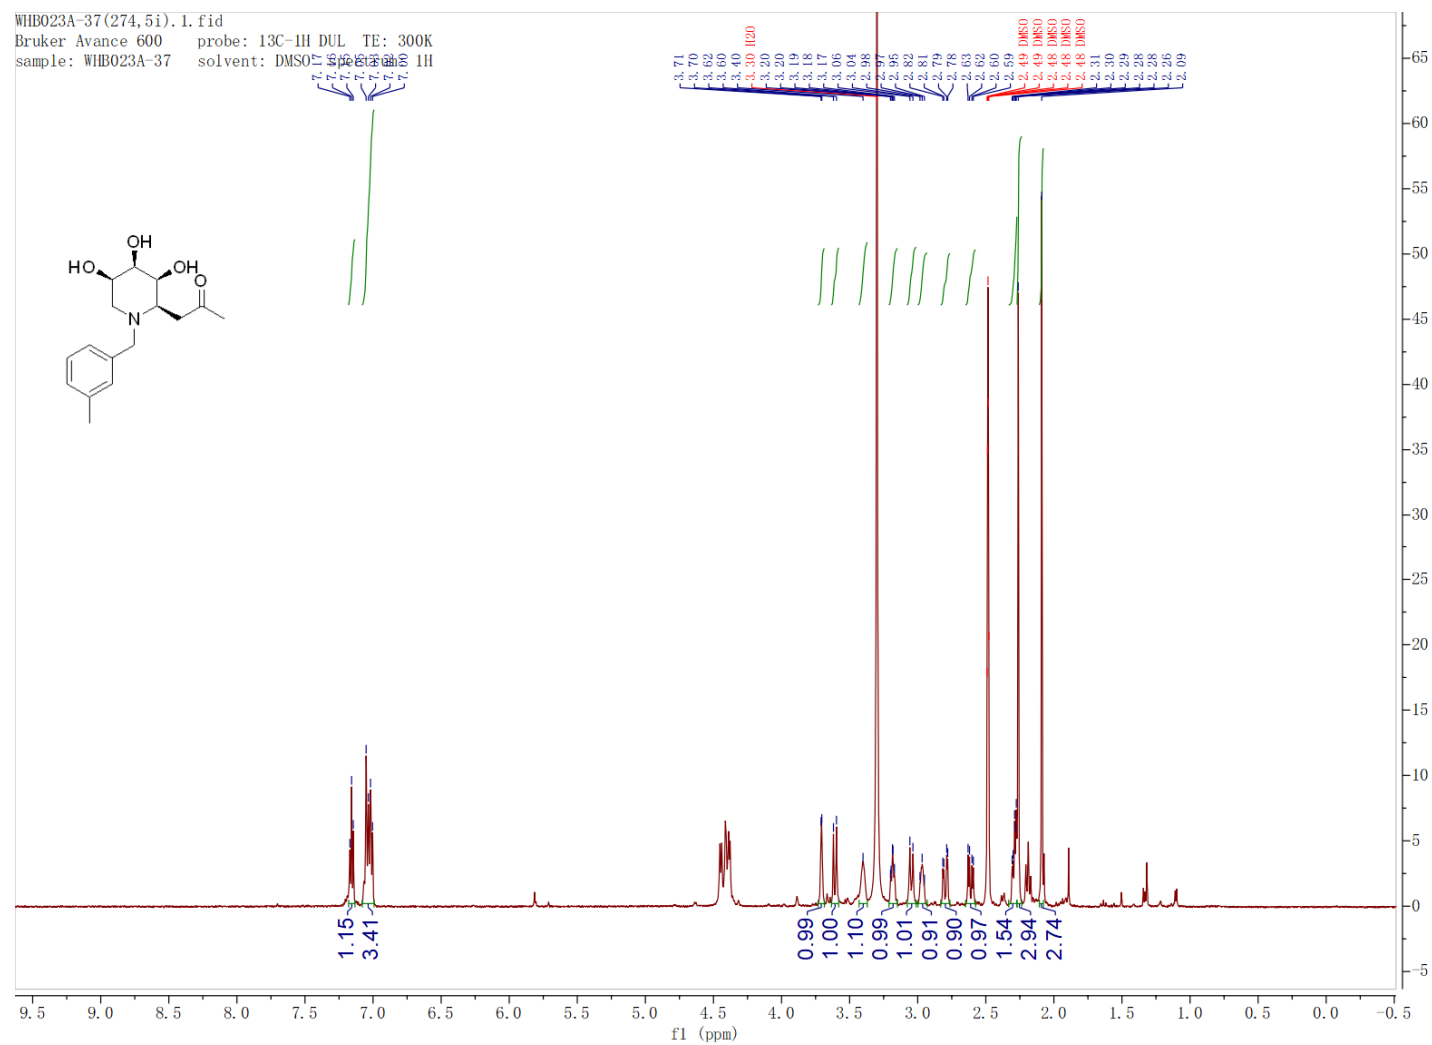

Figure S40. The  $^1\text{H}$  NMR of compound 5k.

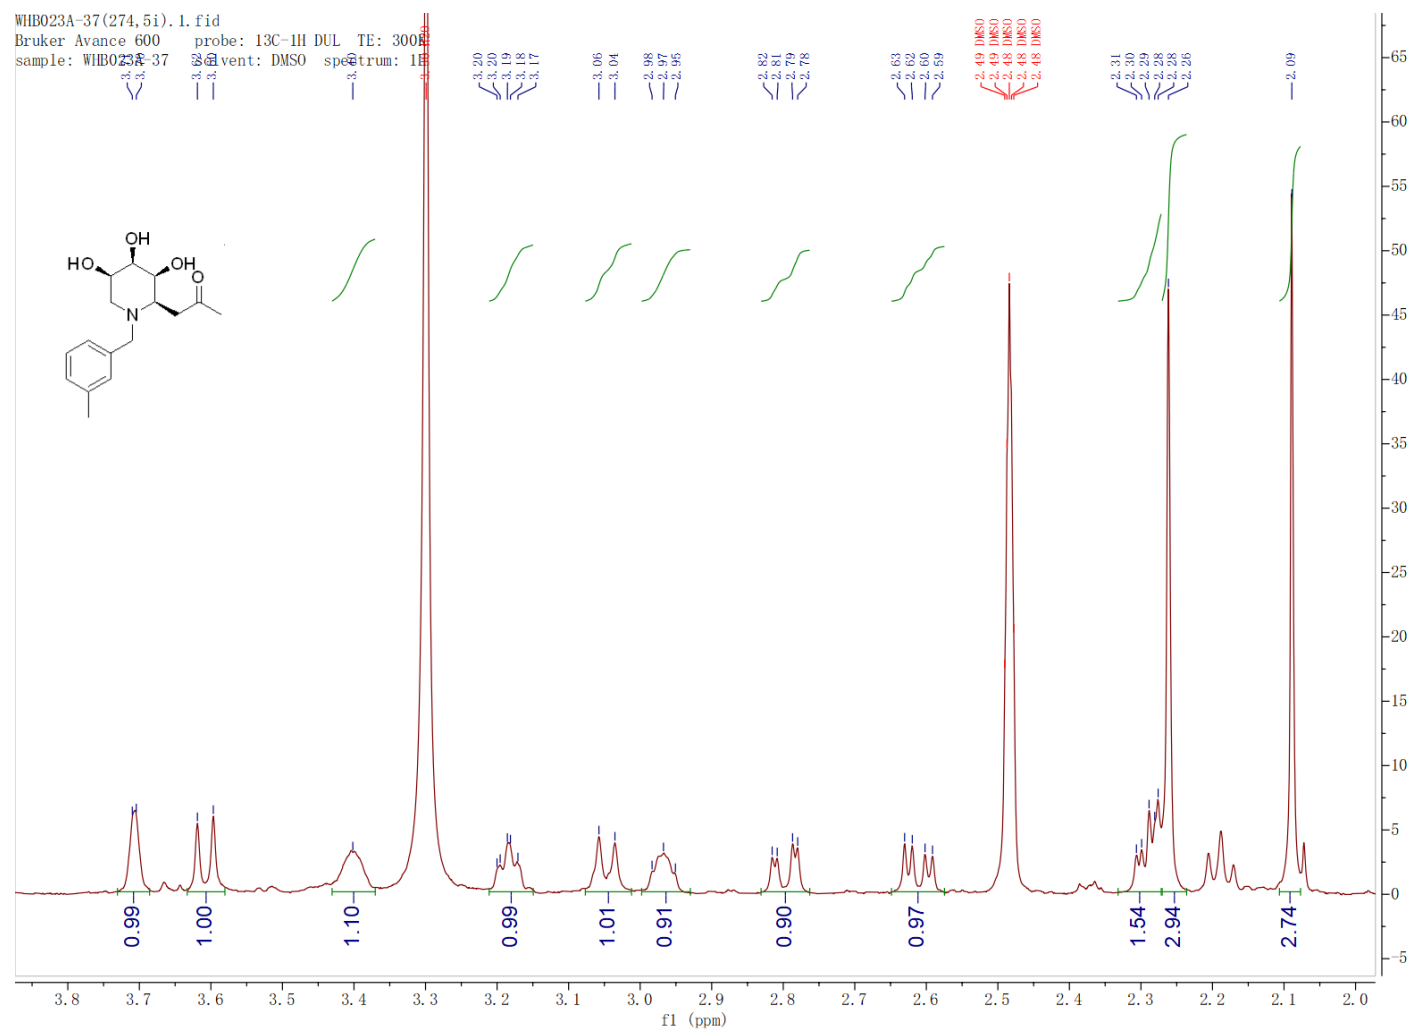

**Figure S41.** Partial region amplification of the  $^1\text{H}$  NMR of compound **5k**.

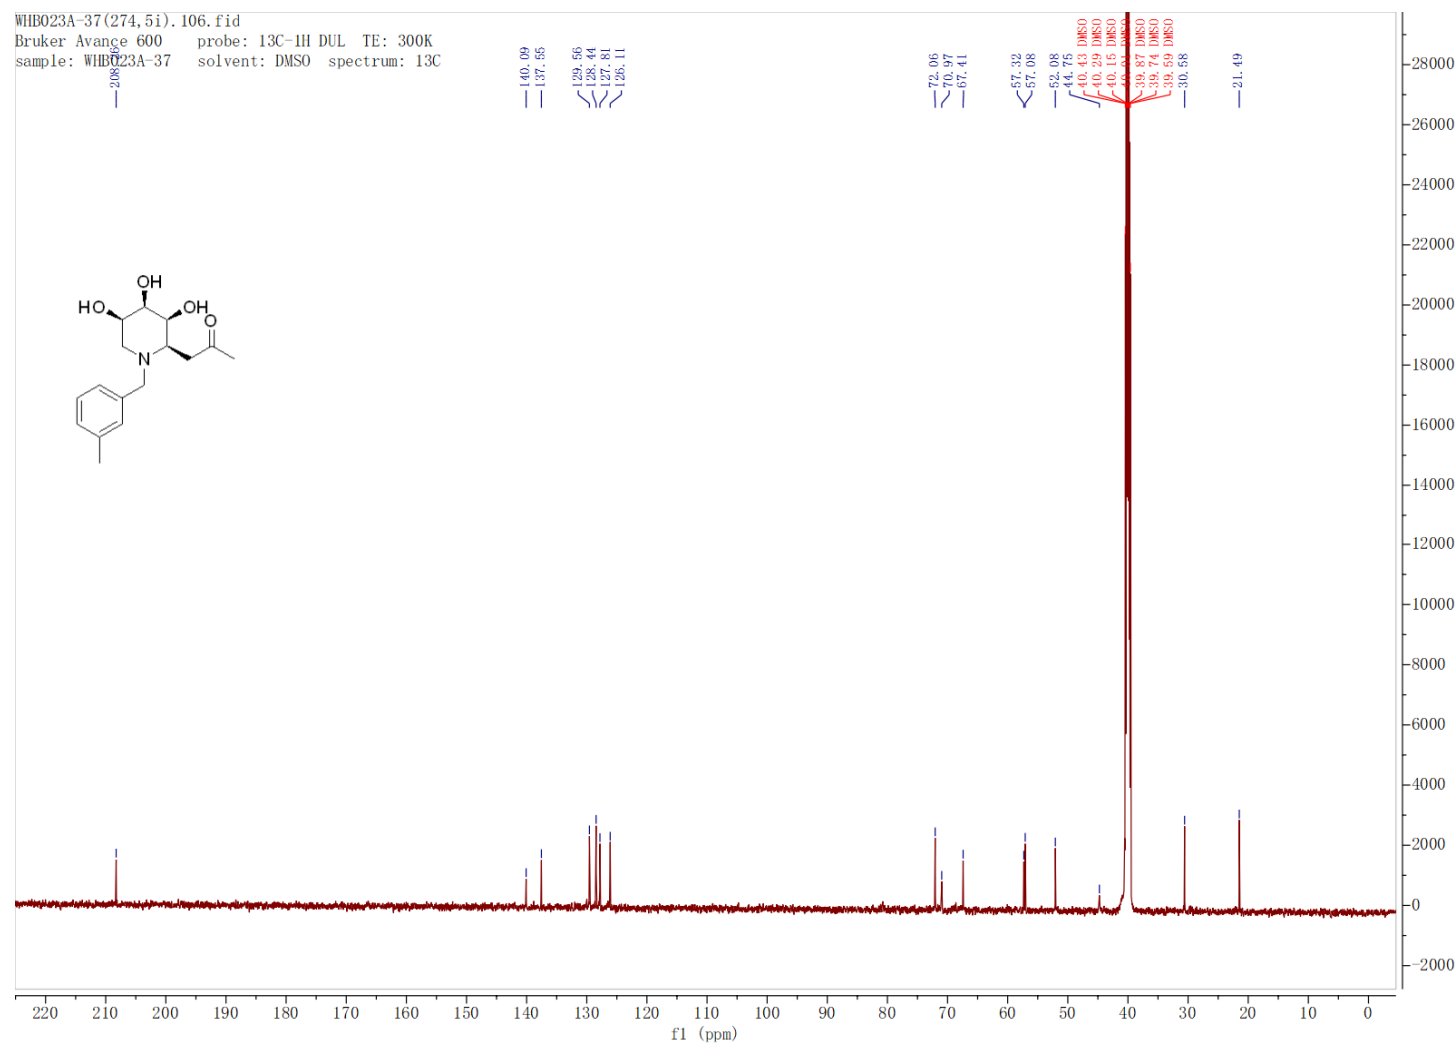

Figure S42. The  $^{13}\text{C}$  NMR of compound 5k.

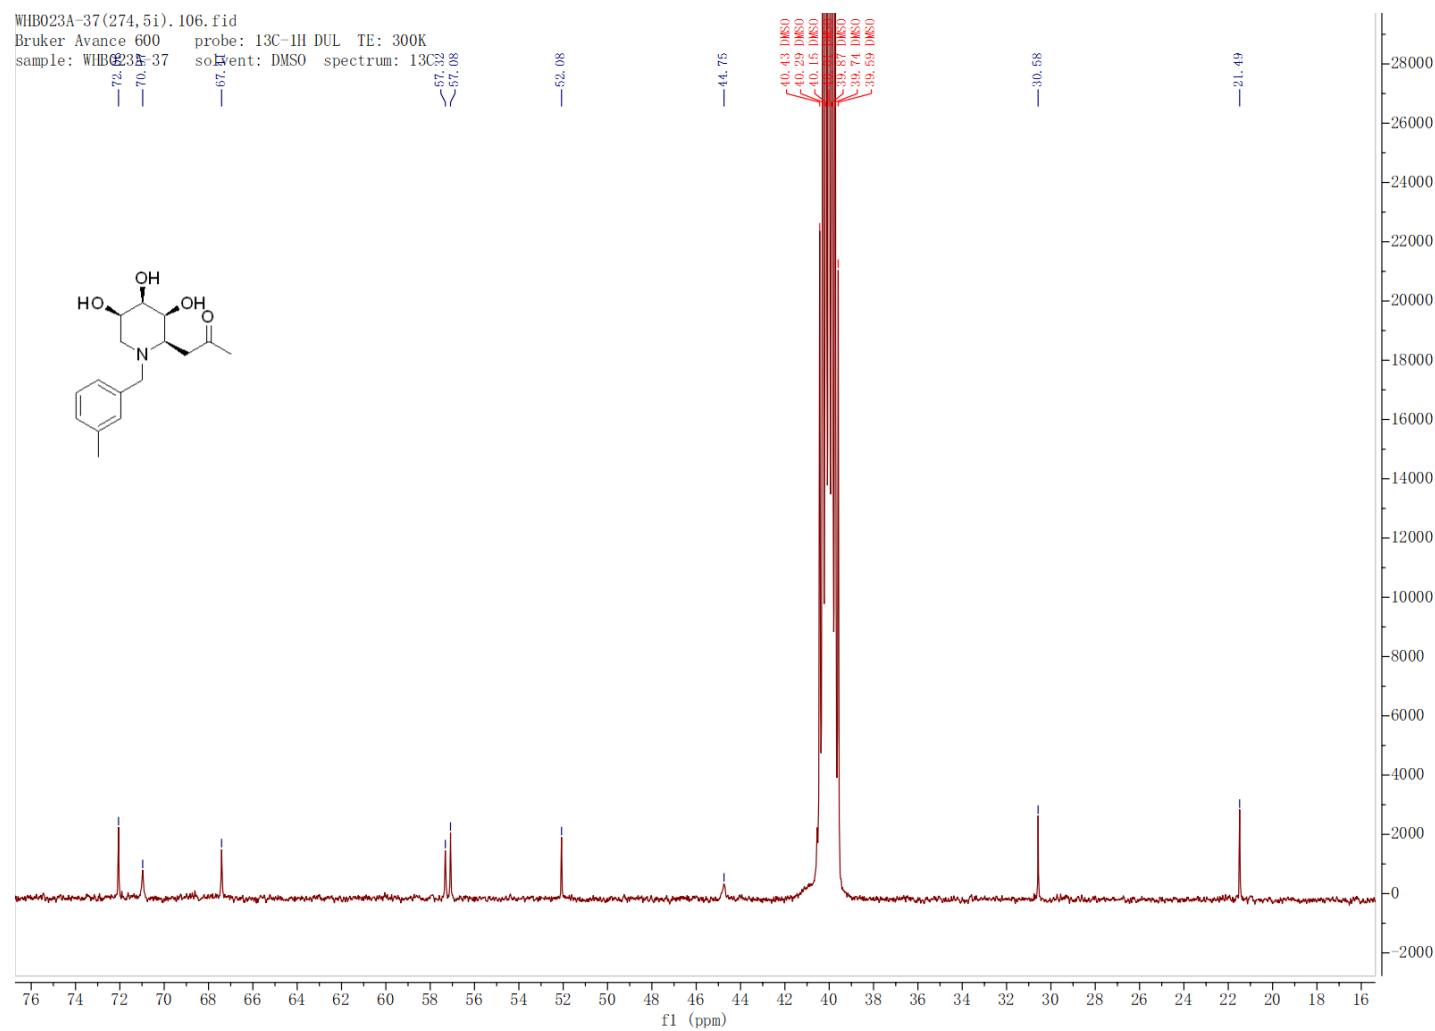

Figure S43. Partial region amplification of the  $^{13}\text{C}$  NMR of compound **5k**.



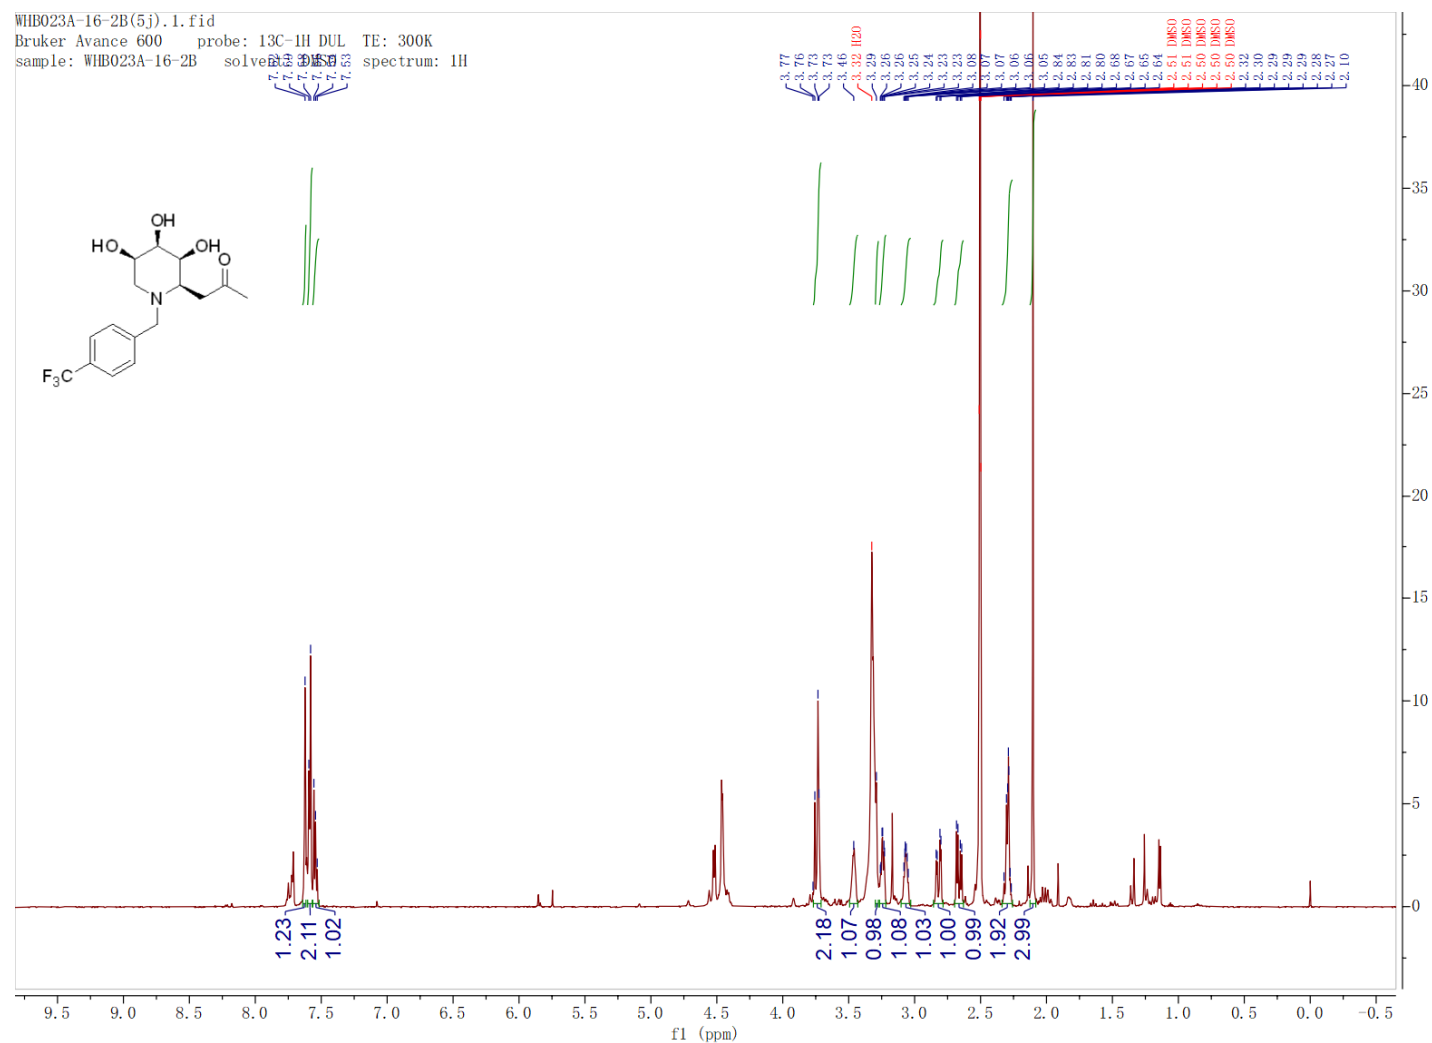

Figure S44. The  $^1\text{H}$  NMR of compound 51.

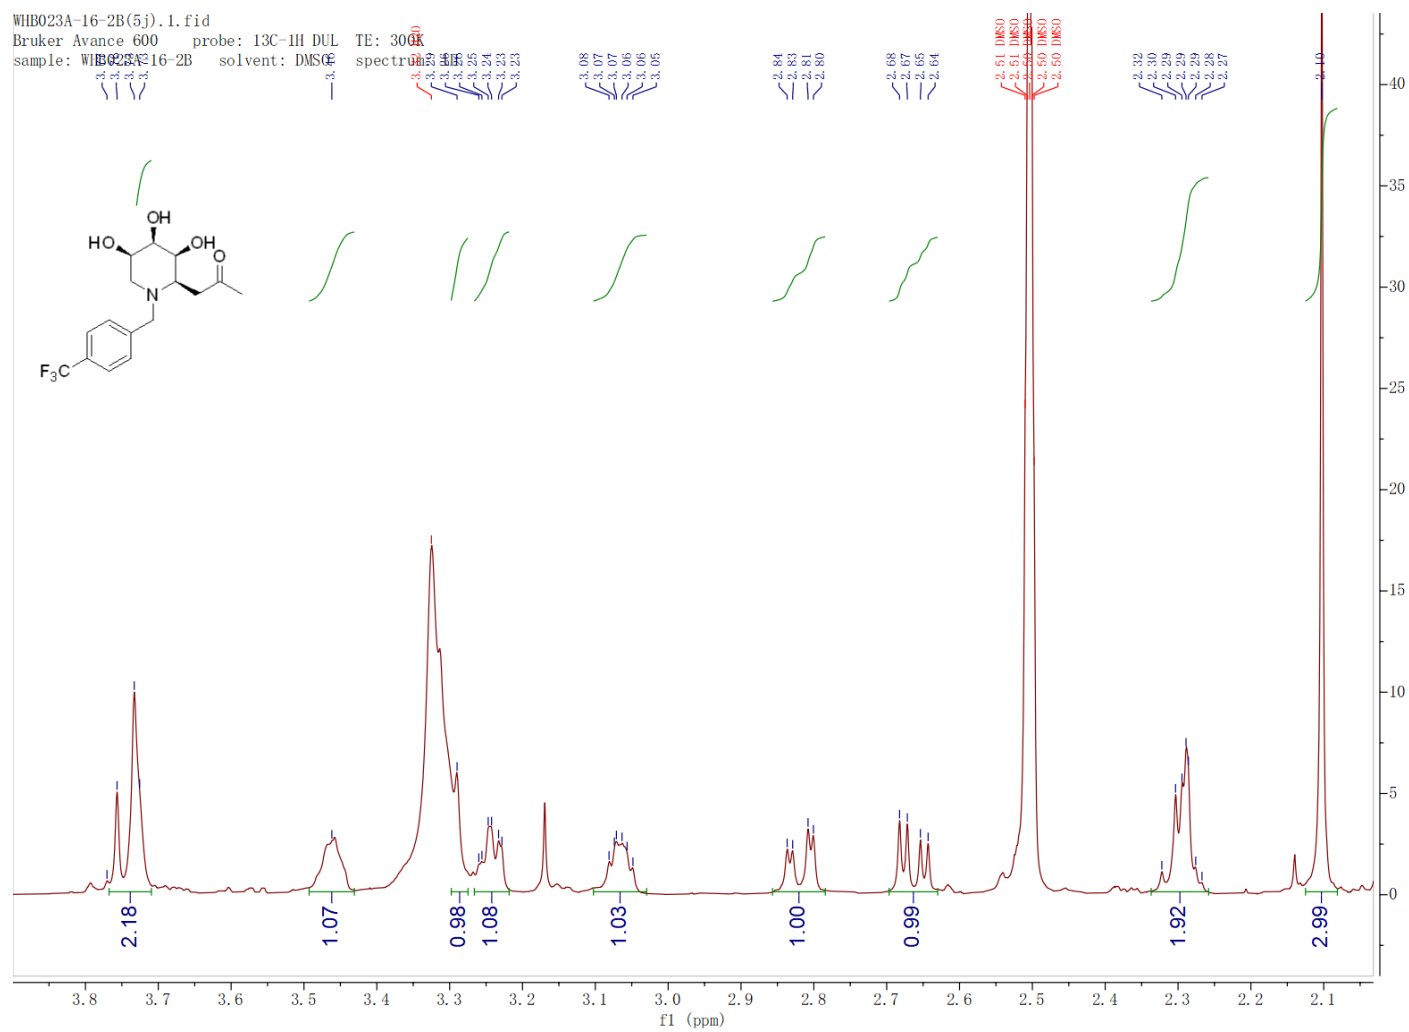

**Figure S45.** Partial region amplification of the  $^1\text{H}$  NMR of compound **51**.

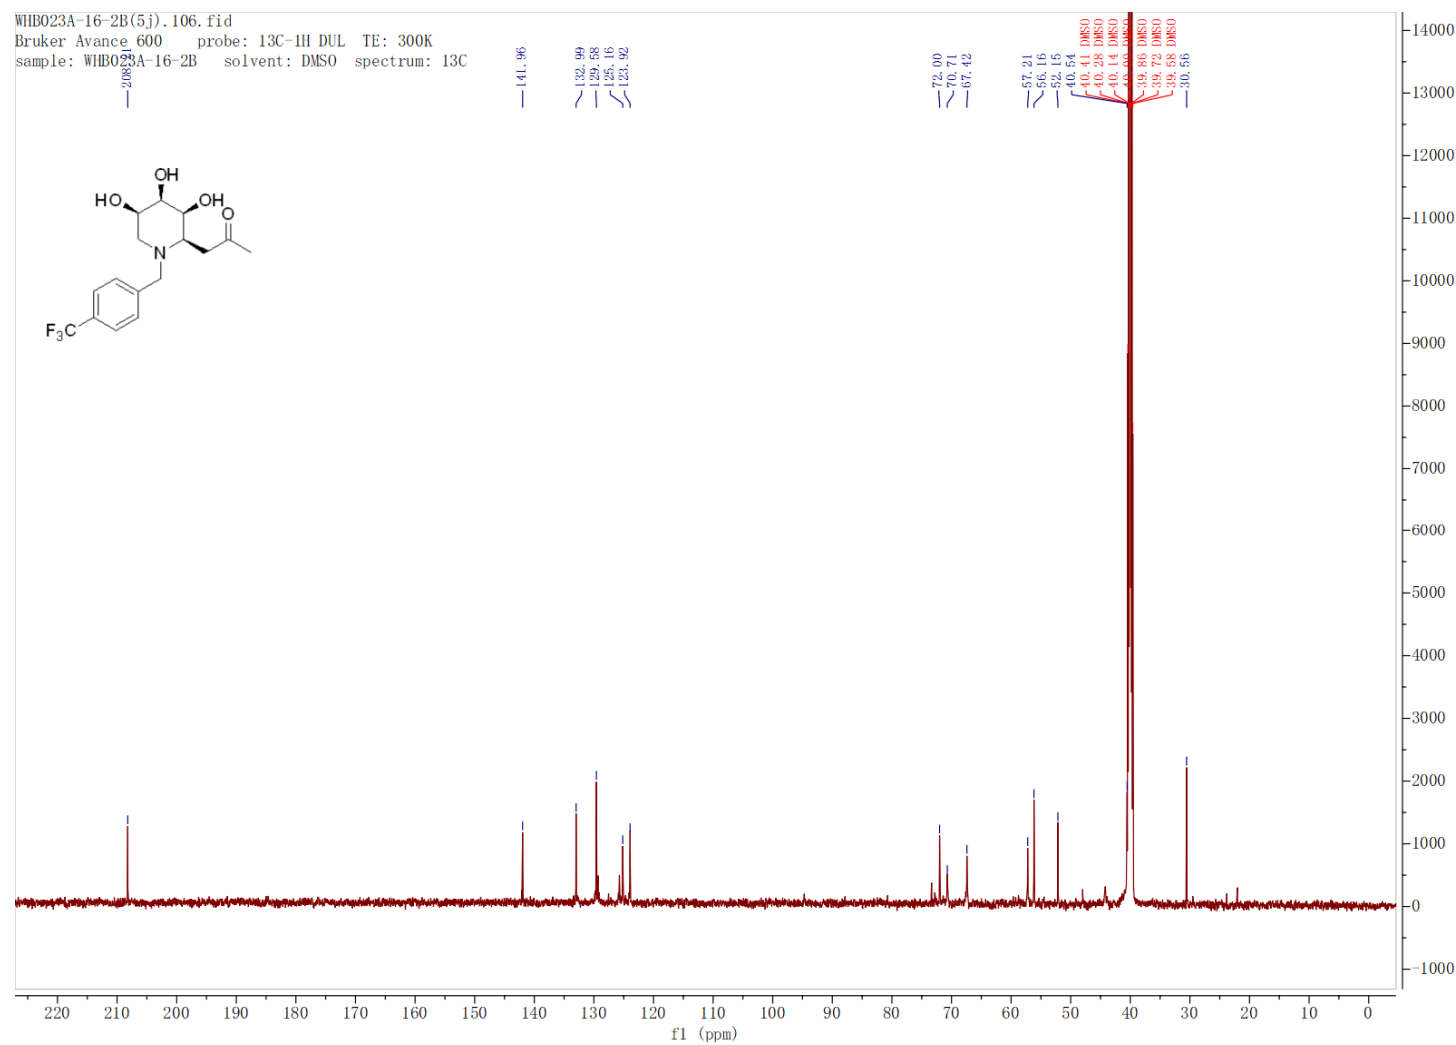

Figure S46. The  $^{13}\text{C}$  NMR of compound 51.

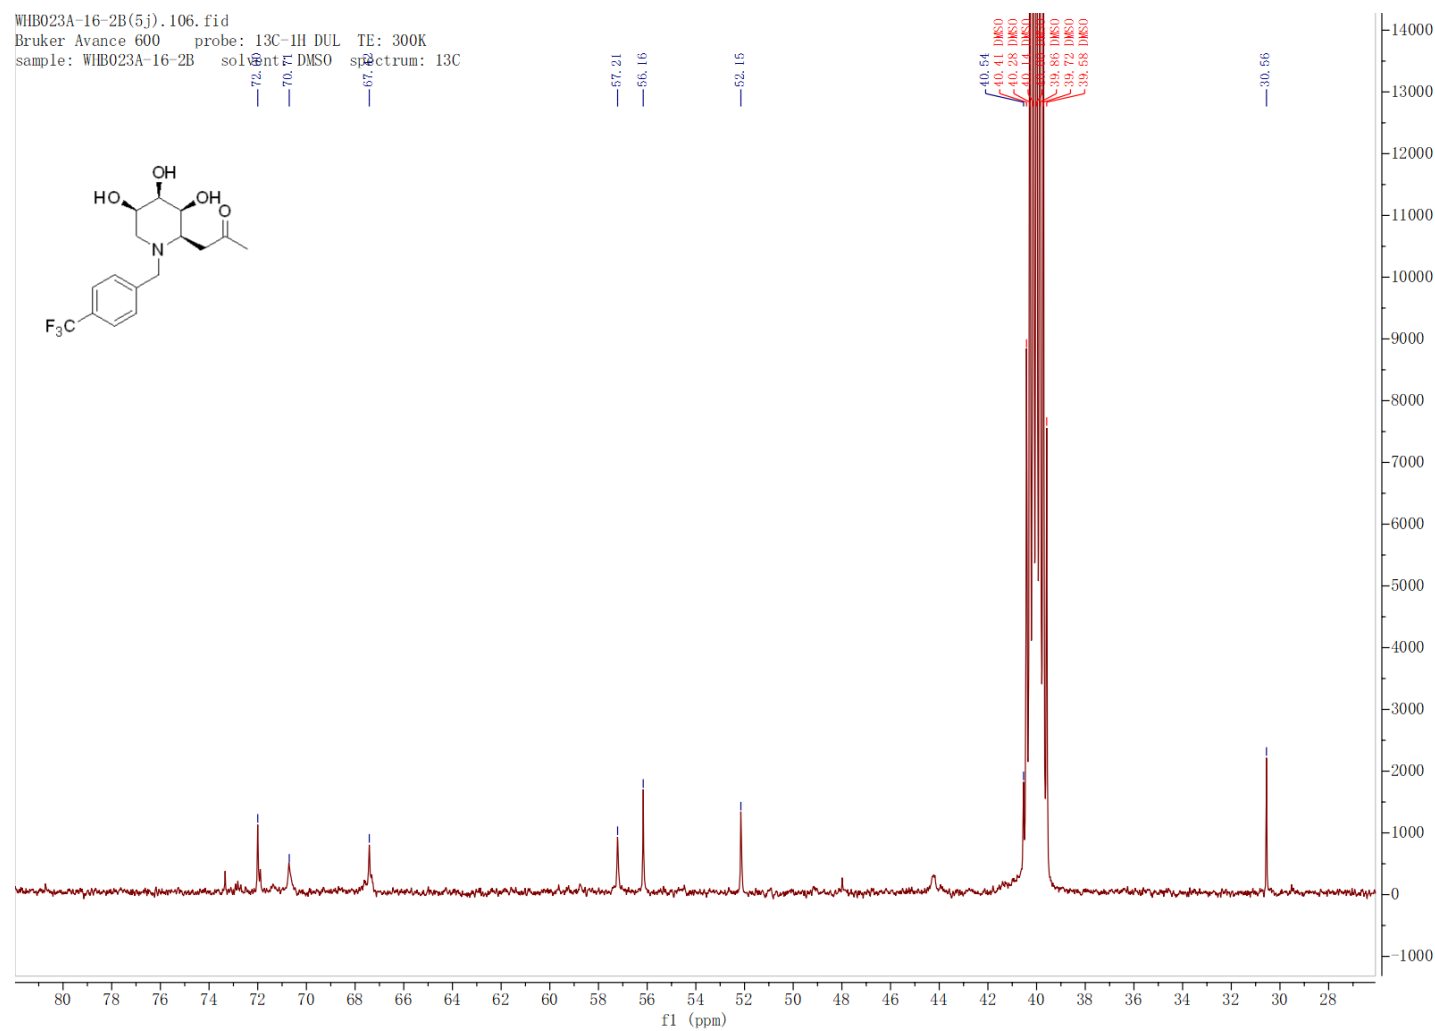

**Figure S47.** Partial region amplification of the  $^{13}\text{C}$  NMR of compound **51**.

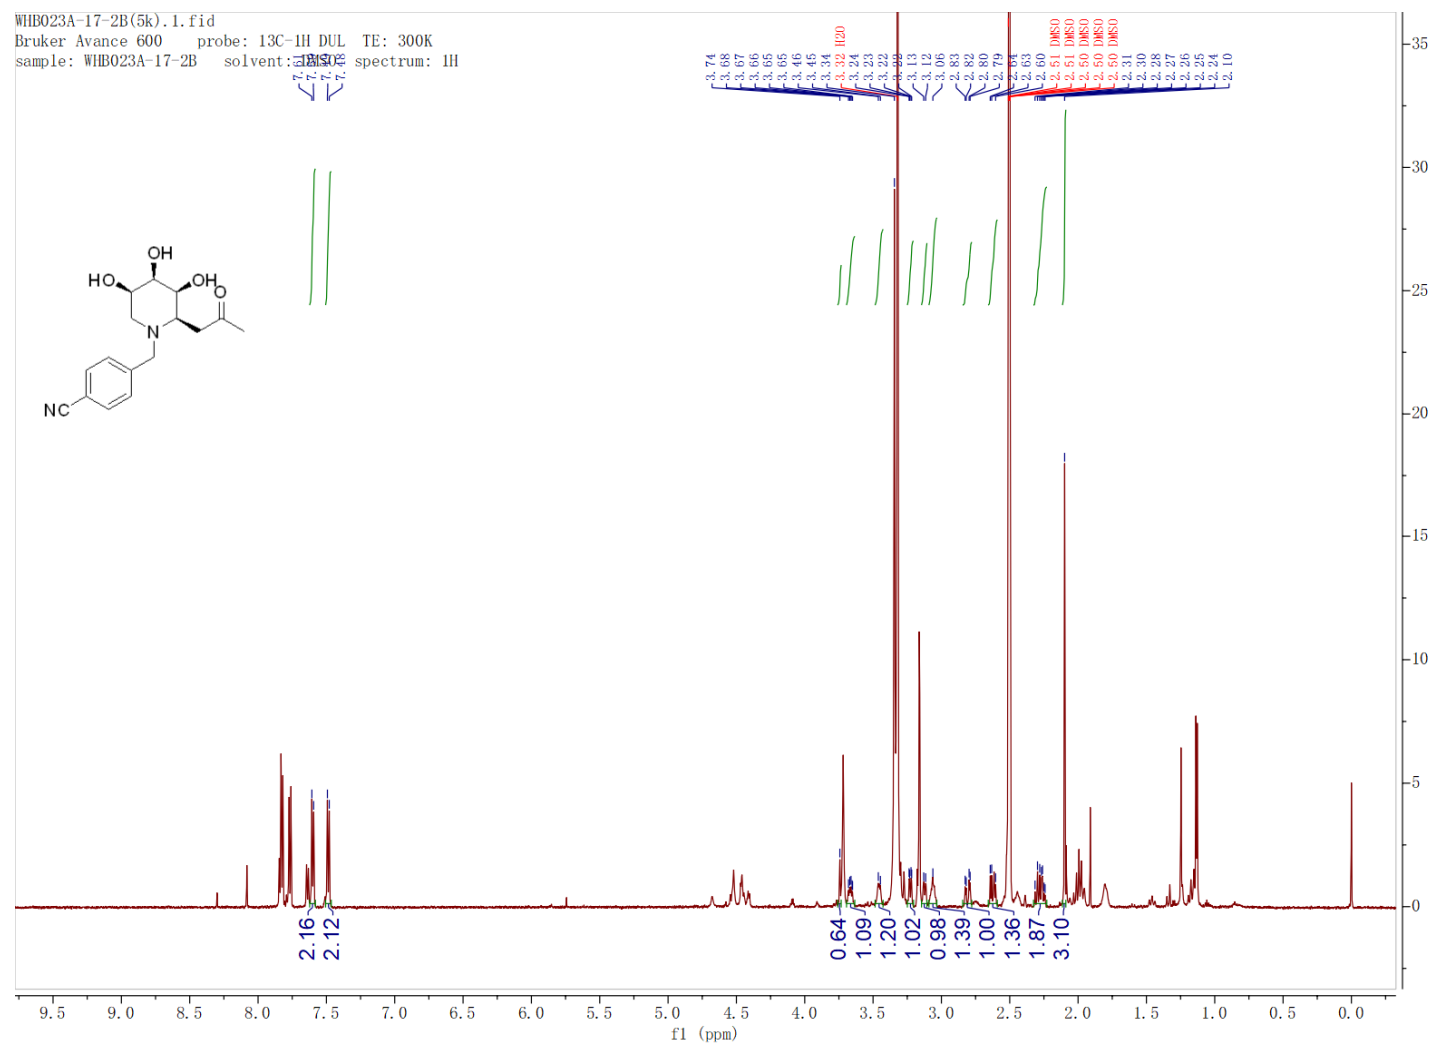

Figure S48. The  $^1\text{H}$  NMR of compound 5m.

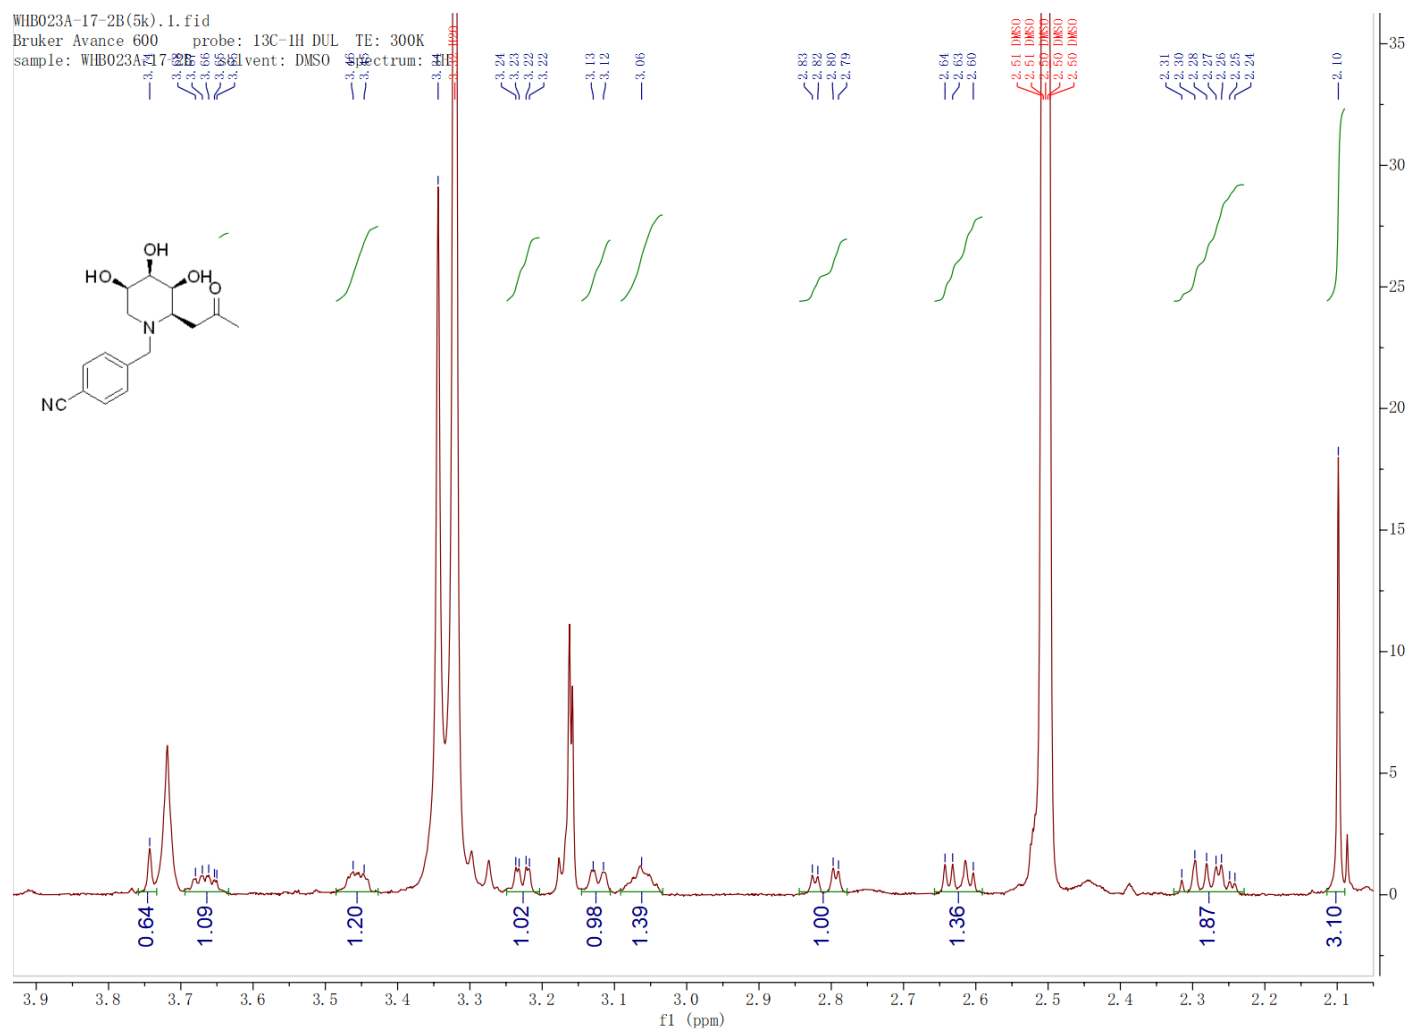

**Figure S49.** Partial region amplification of the  $^1\text{H}$  NMR of compound **5m**.

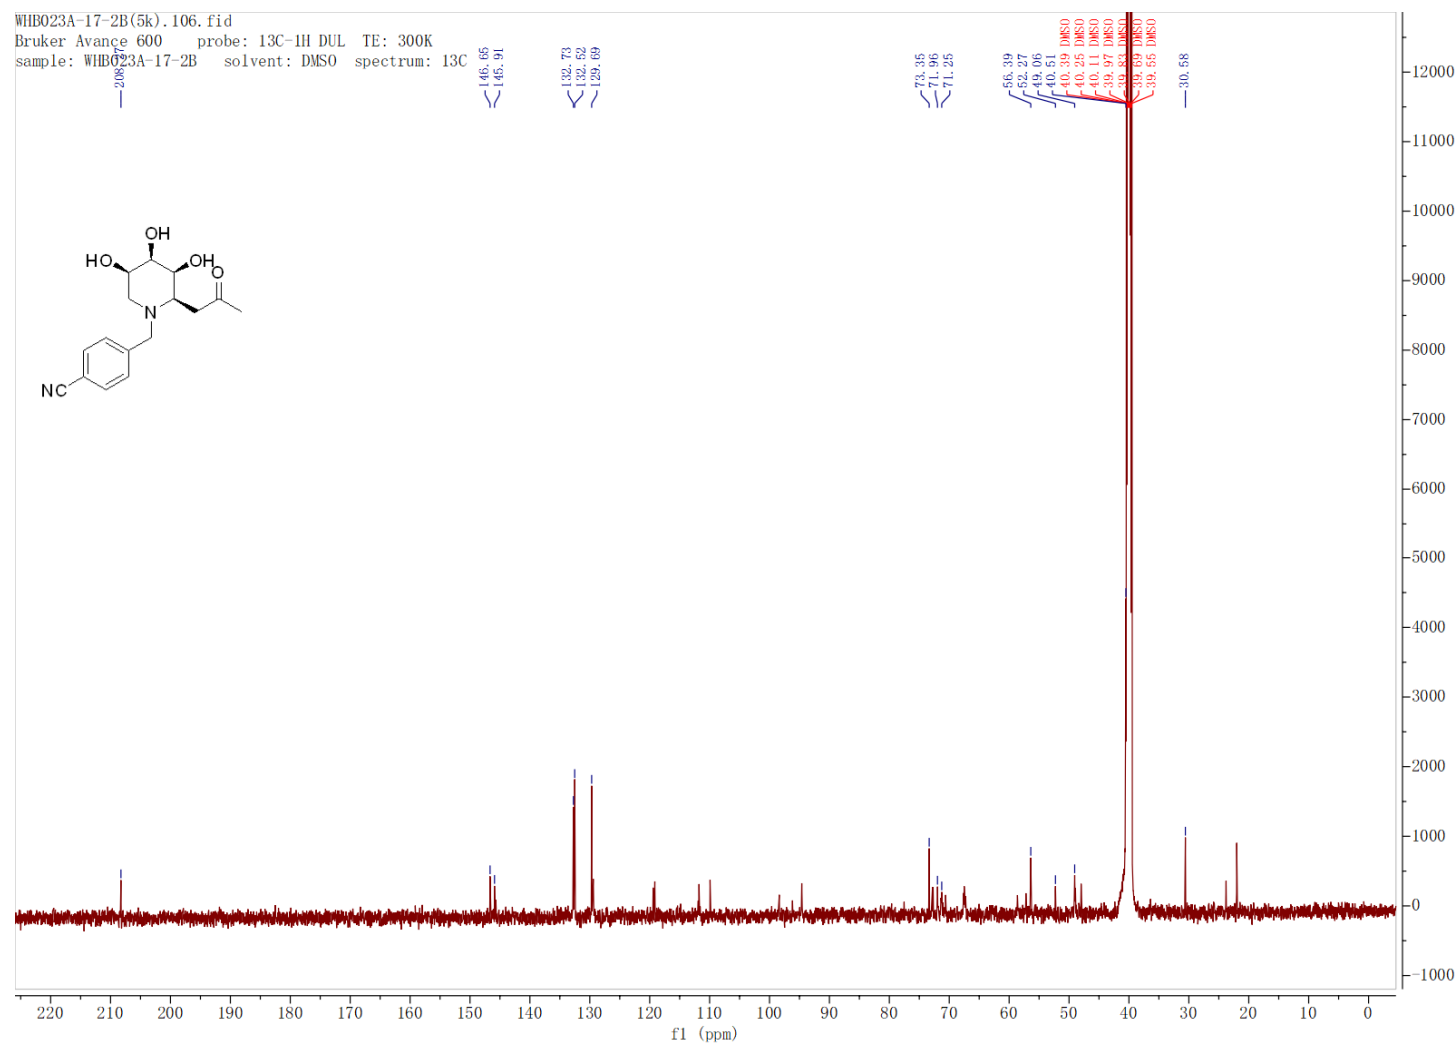

Figure S50. The  $^{13}\text{C}$  NMR of compound **5m**.

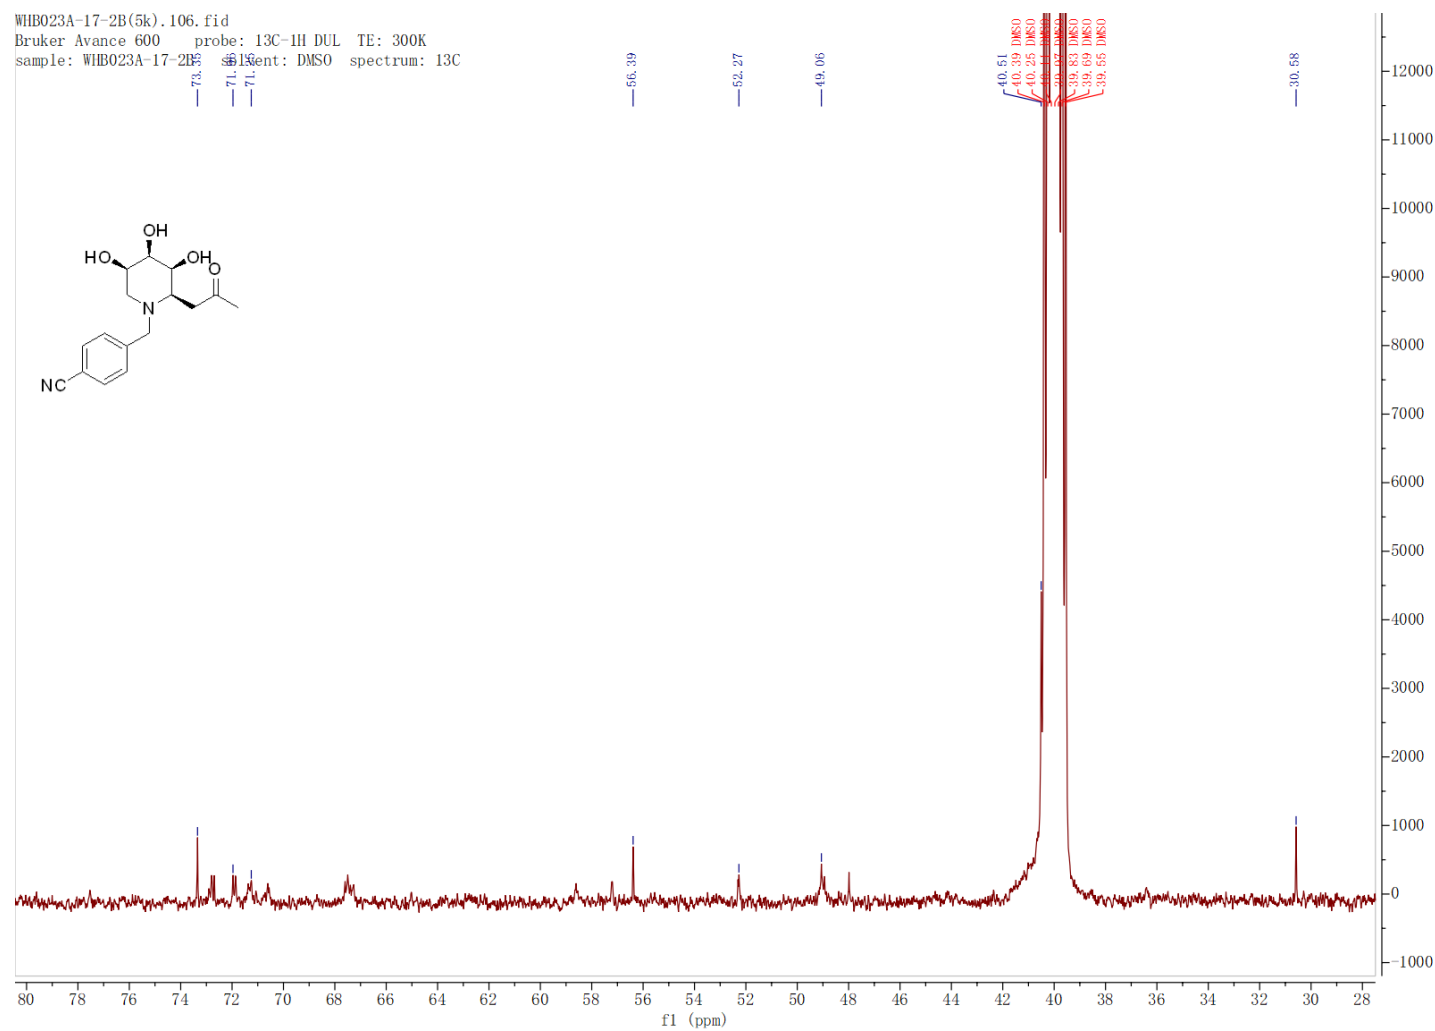

**Figure S51.** Partial region amplification of the  $^{13}\text{C}$  NMR of compound **5m**.



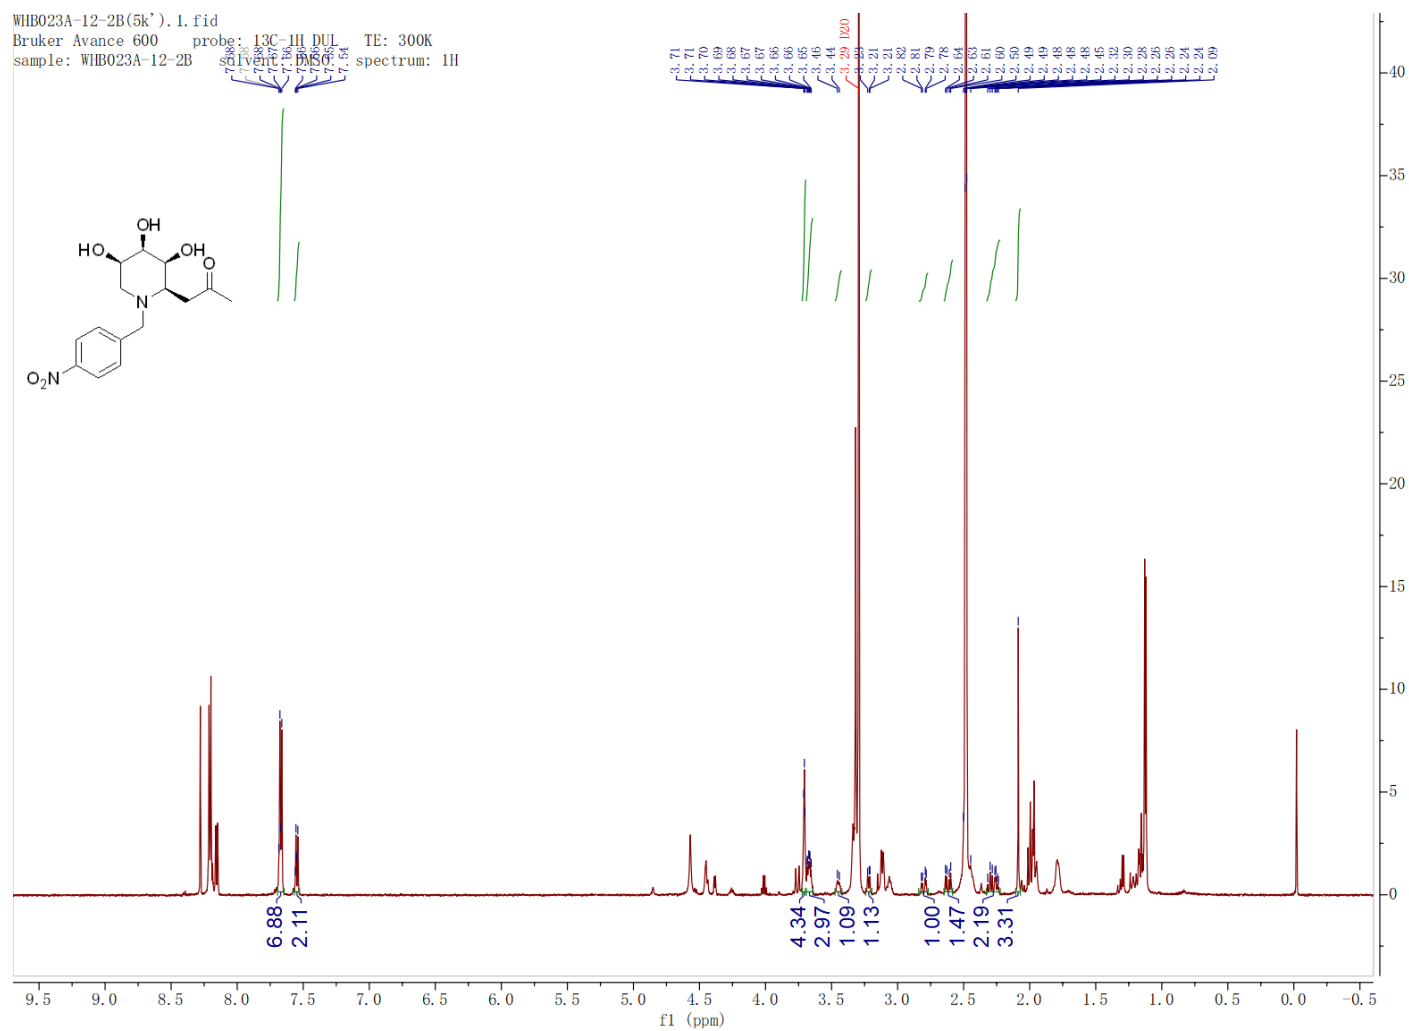

Figure S52. The  $^1\text{H}$  NMR of compound 5n.

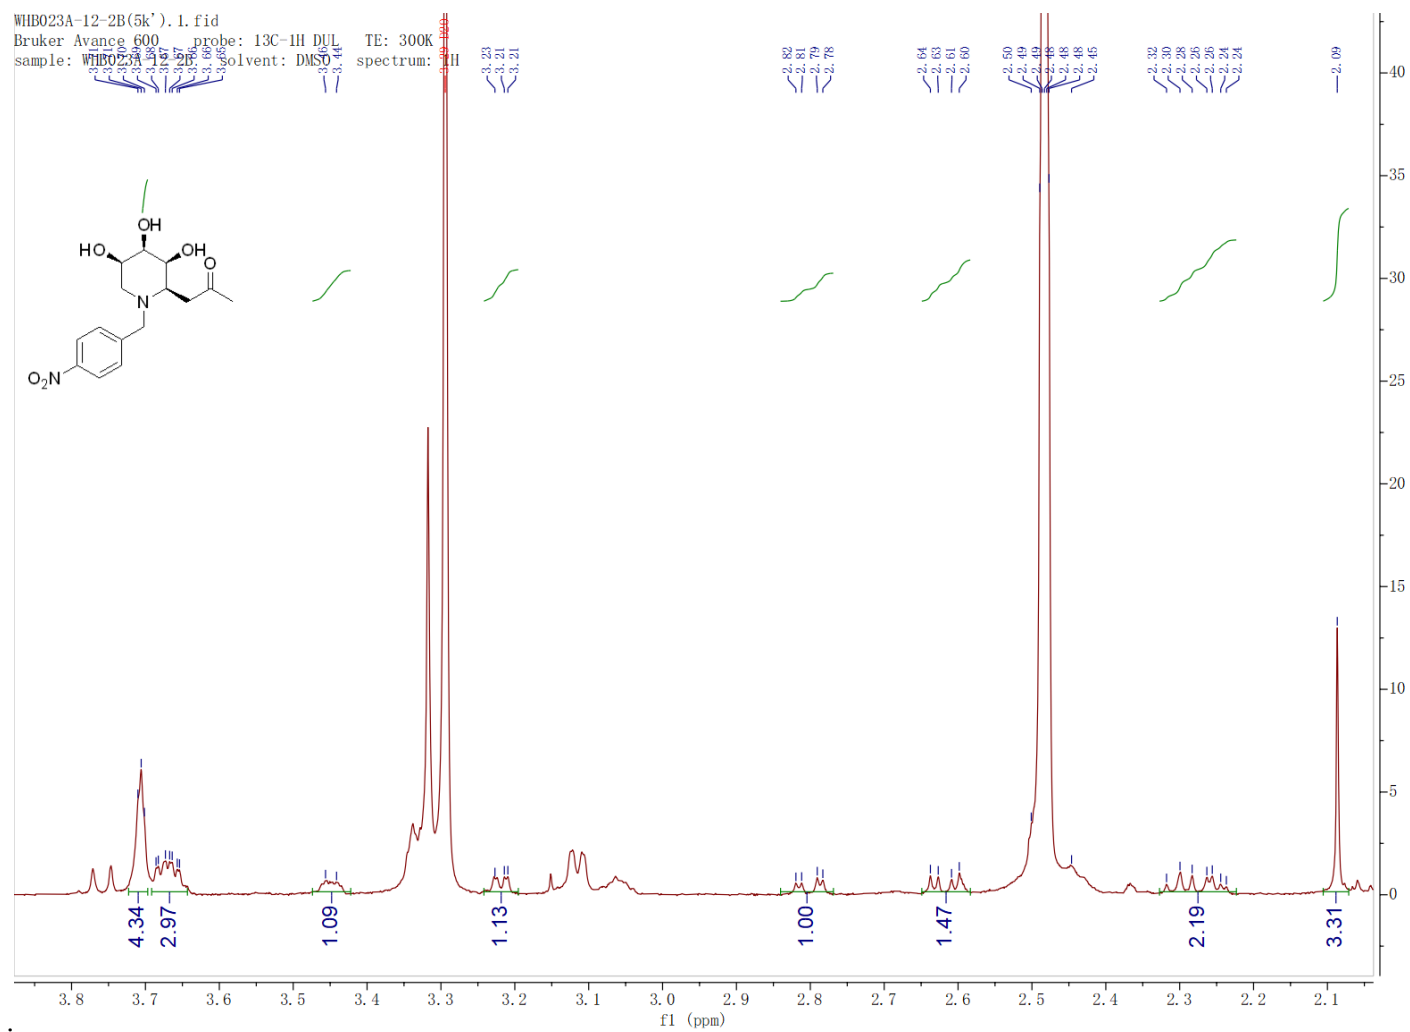

Figure S53. Partial region amplification of the  $^1\text{H}$  NMR of compound **5n**.

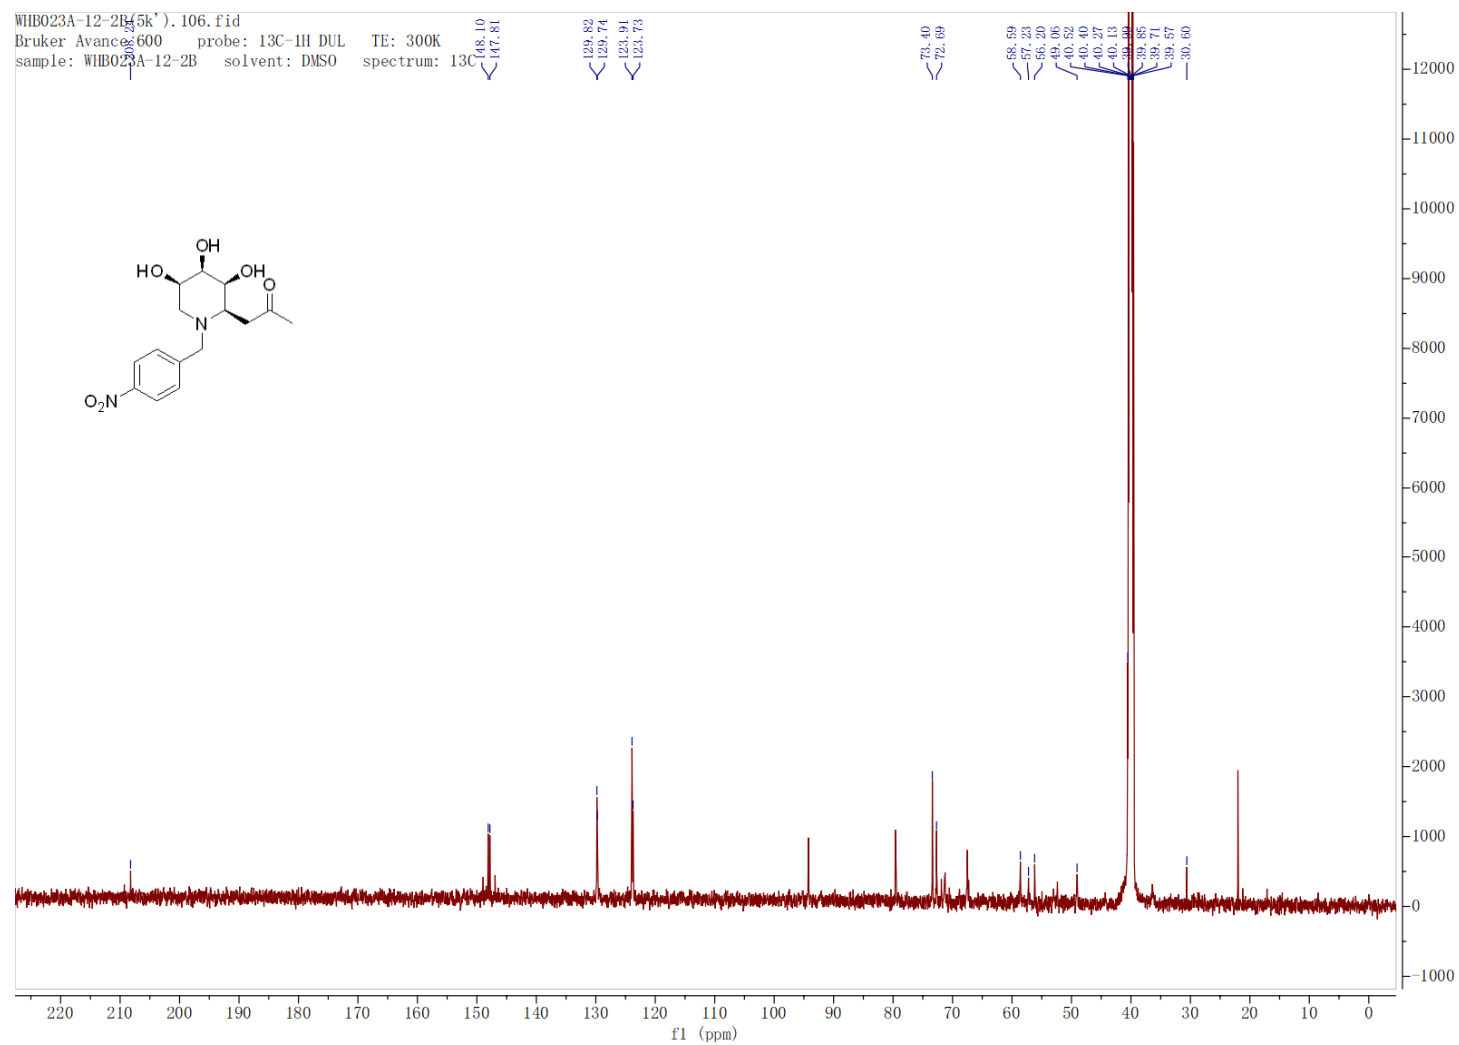

Figure S54. The  $^{13}\text{C}$  NMR of compound 5n.

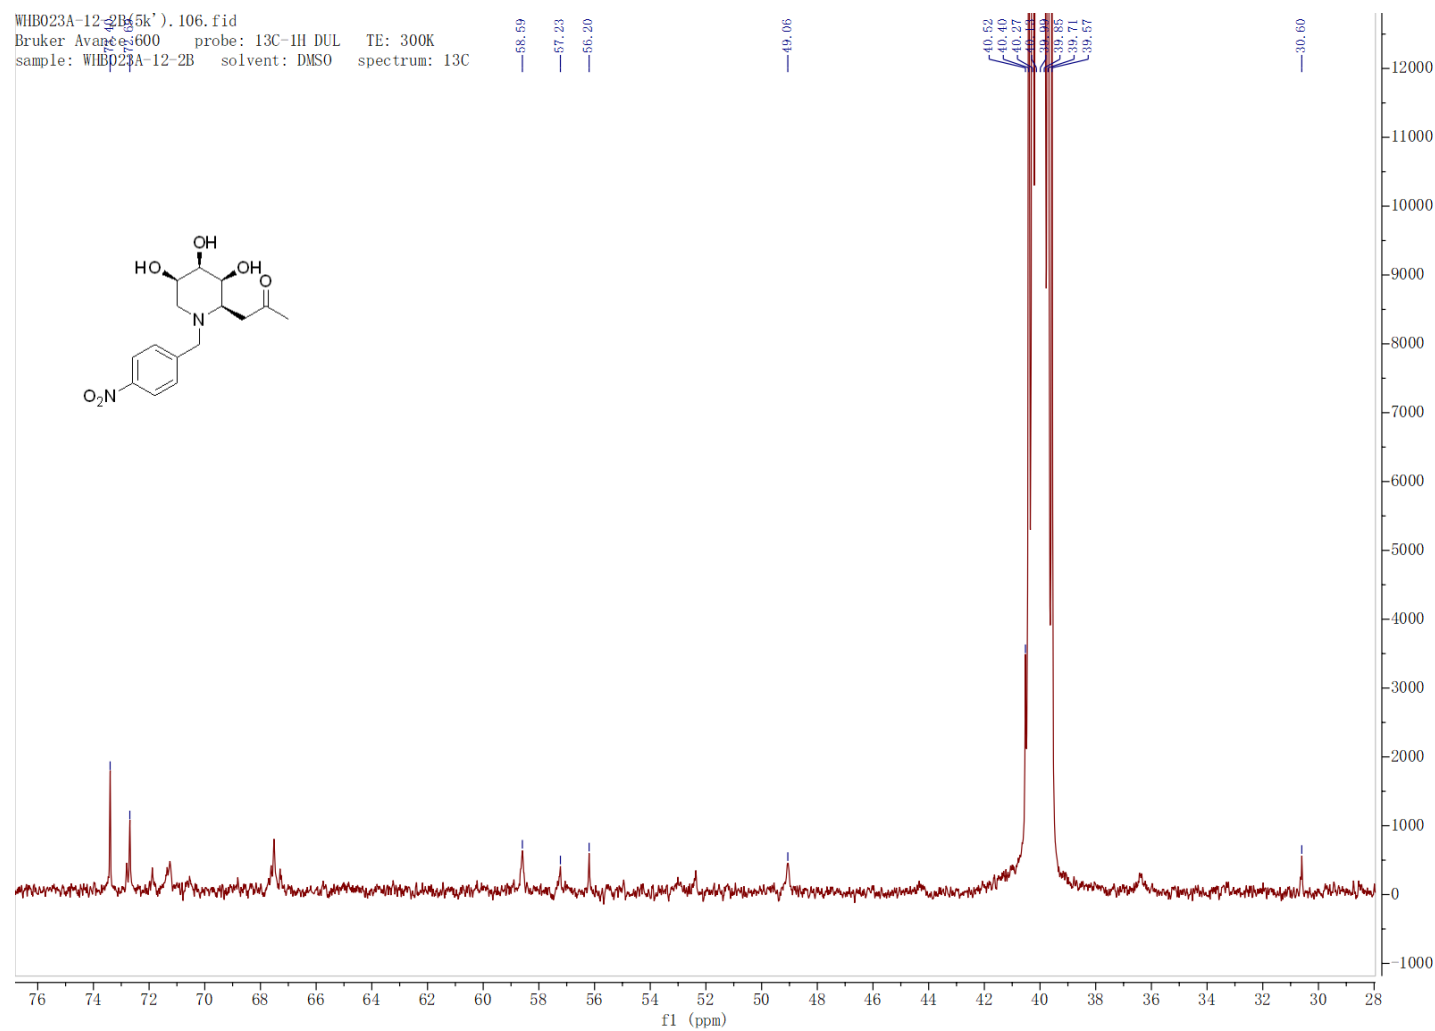

Figure S55. Partial region amplification of the  $^{13}\text{C}$  NMR of compound **5n**.

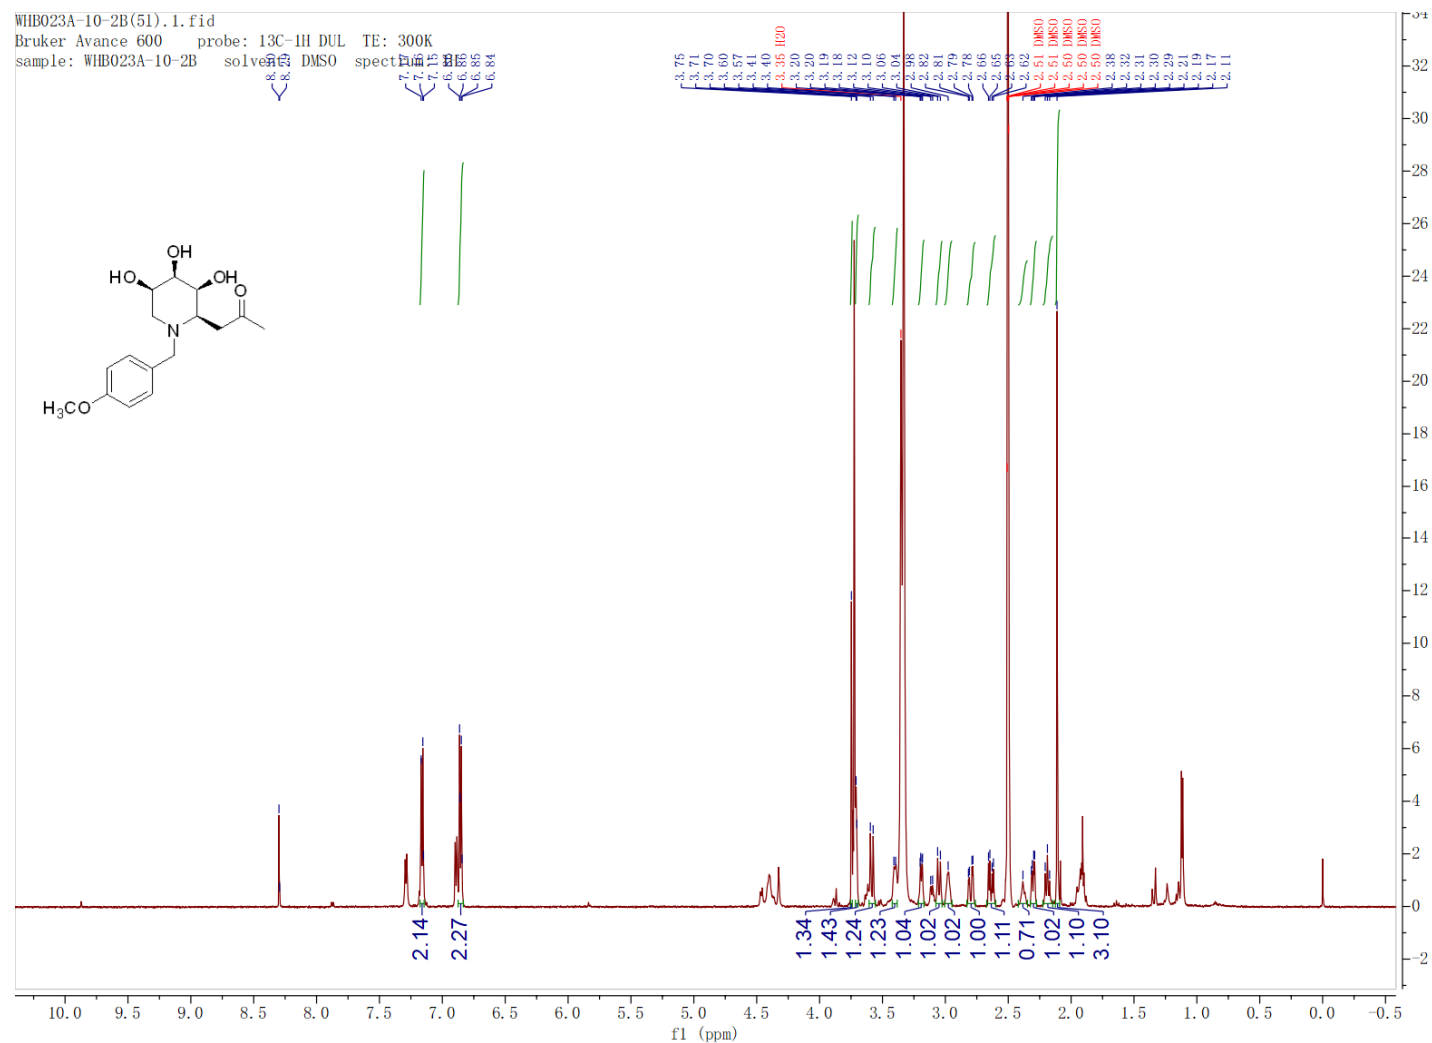

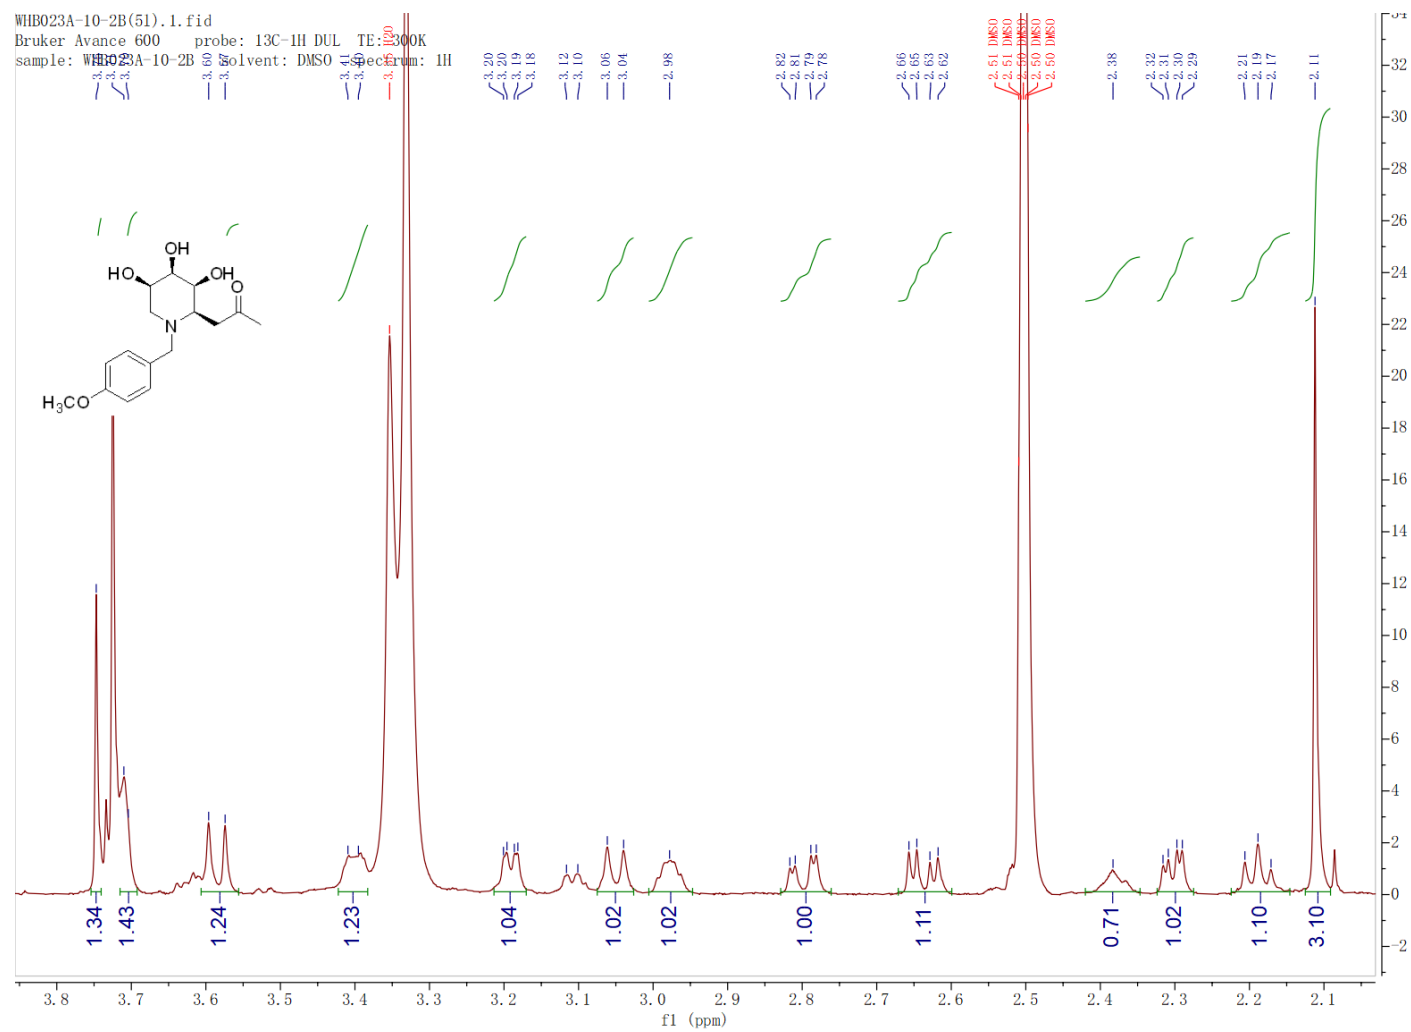

Figure S57. Partial region amplification of the  $^1\text{H}$  NMR of compound 5o.

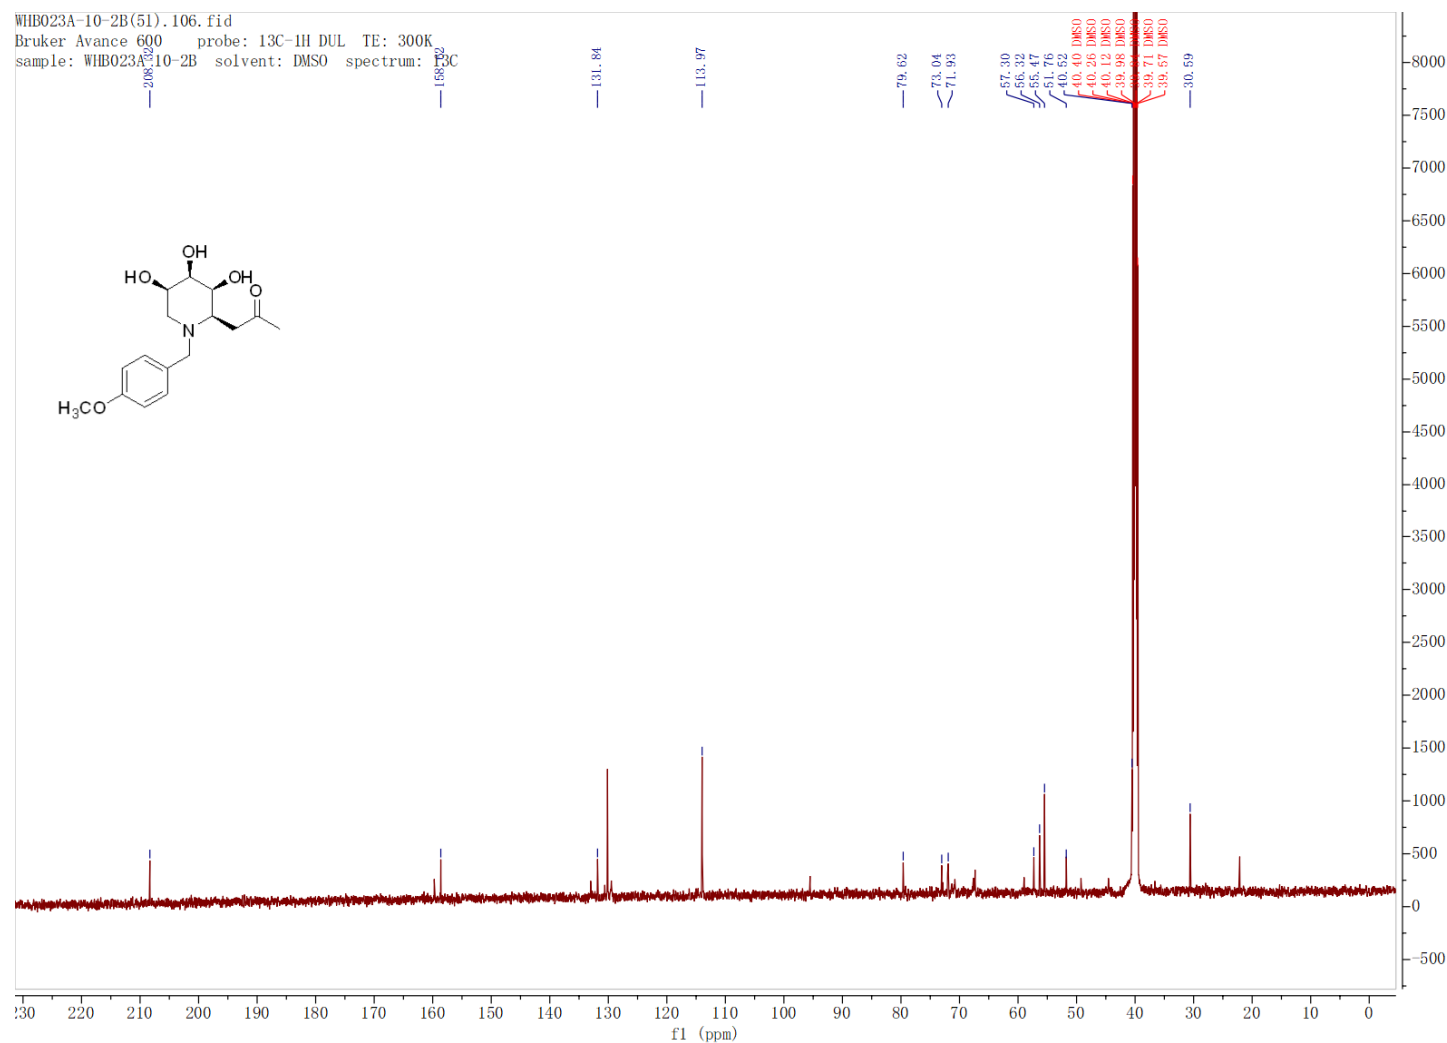

Figure S58. The  $^{13}\text{C}$  NMR of compound **5o**.

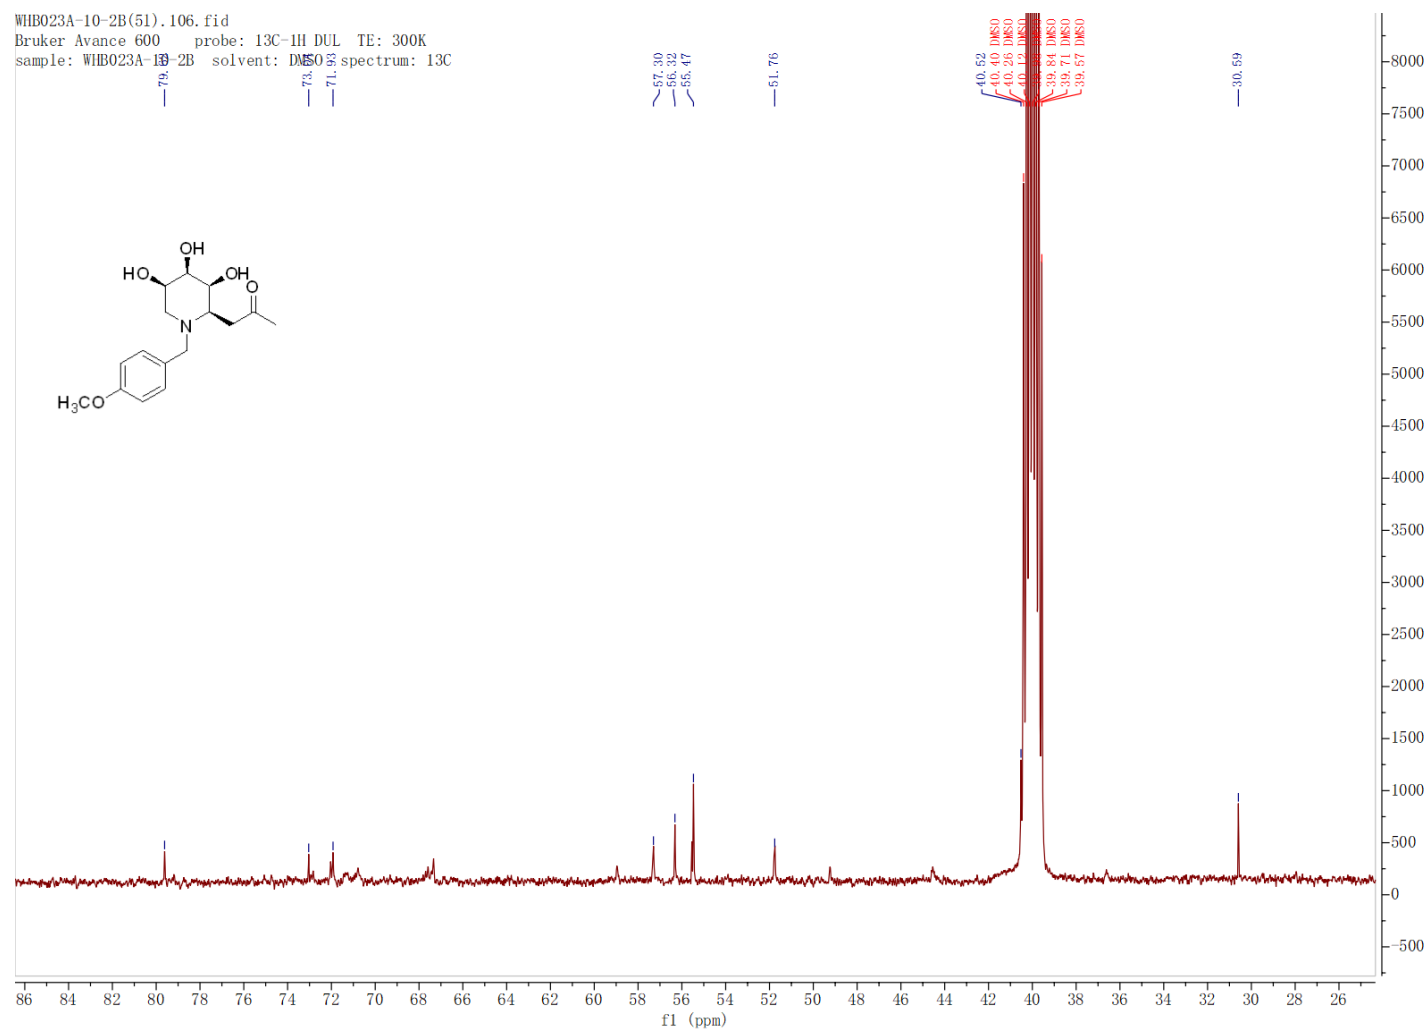

**Figure S59.** Partial region amplification of the  $^{13}\text{C}$  NMR of compound **5o**.



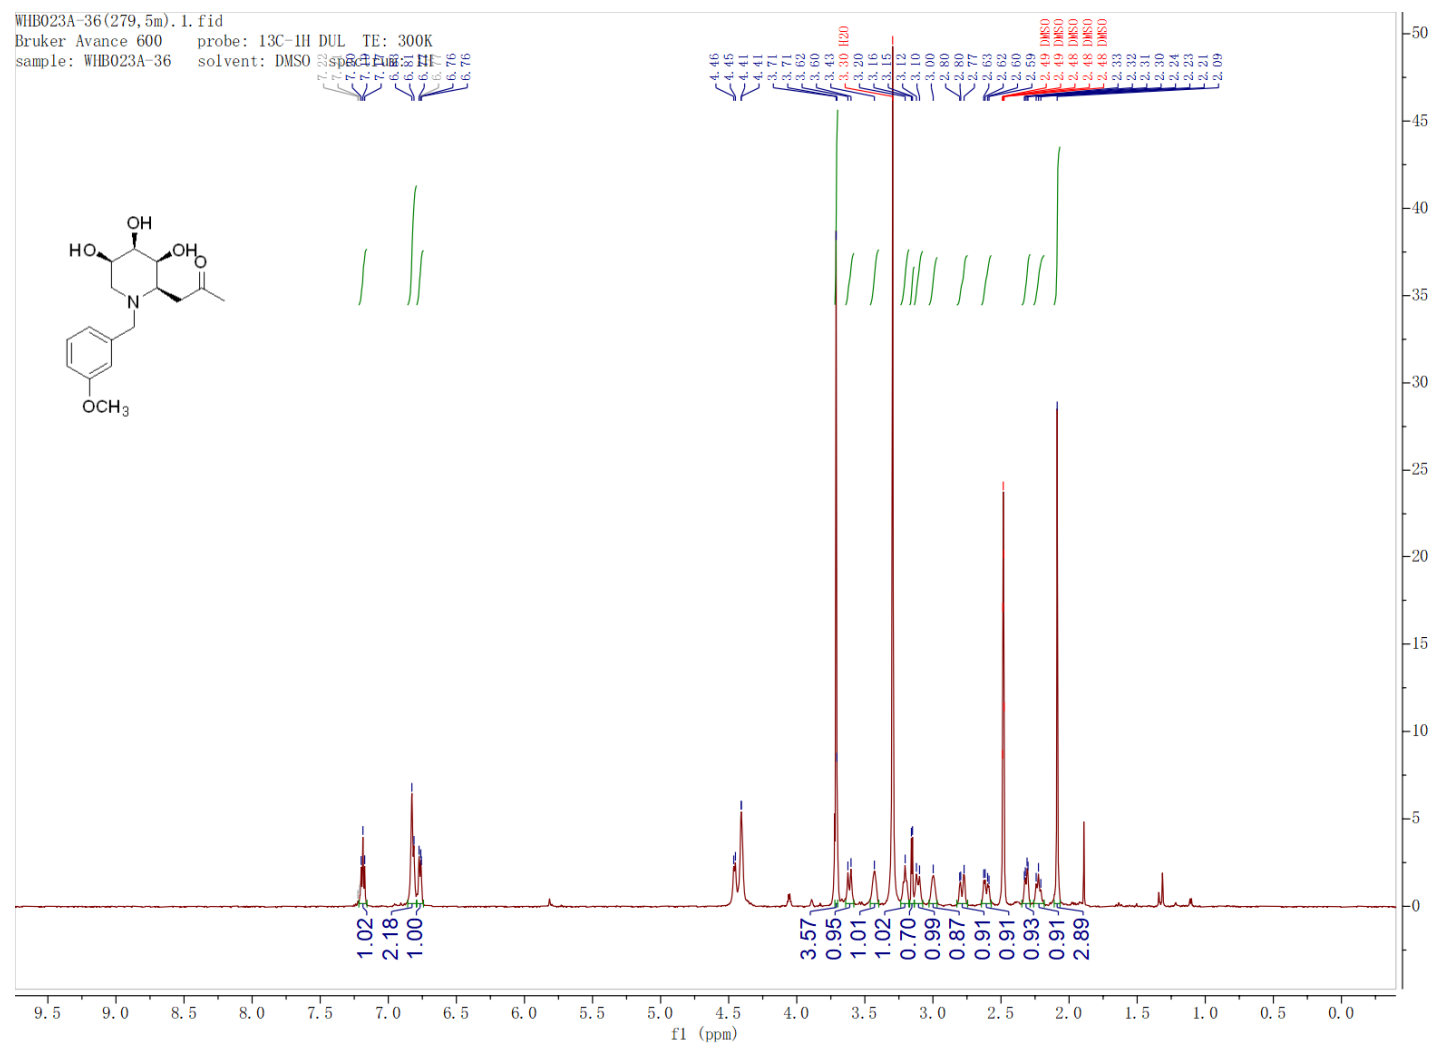

Figure S60. The  $^1\text{H}$  NMR of compound 5p.

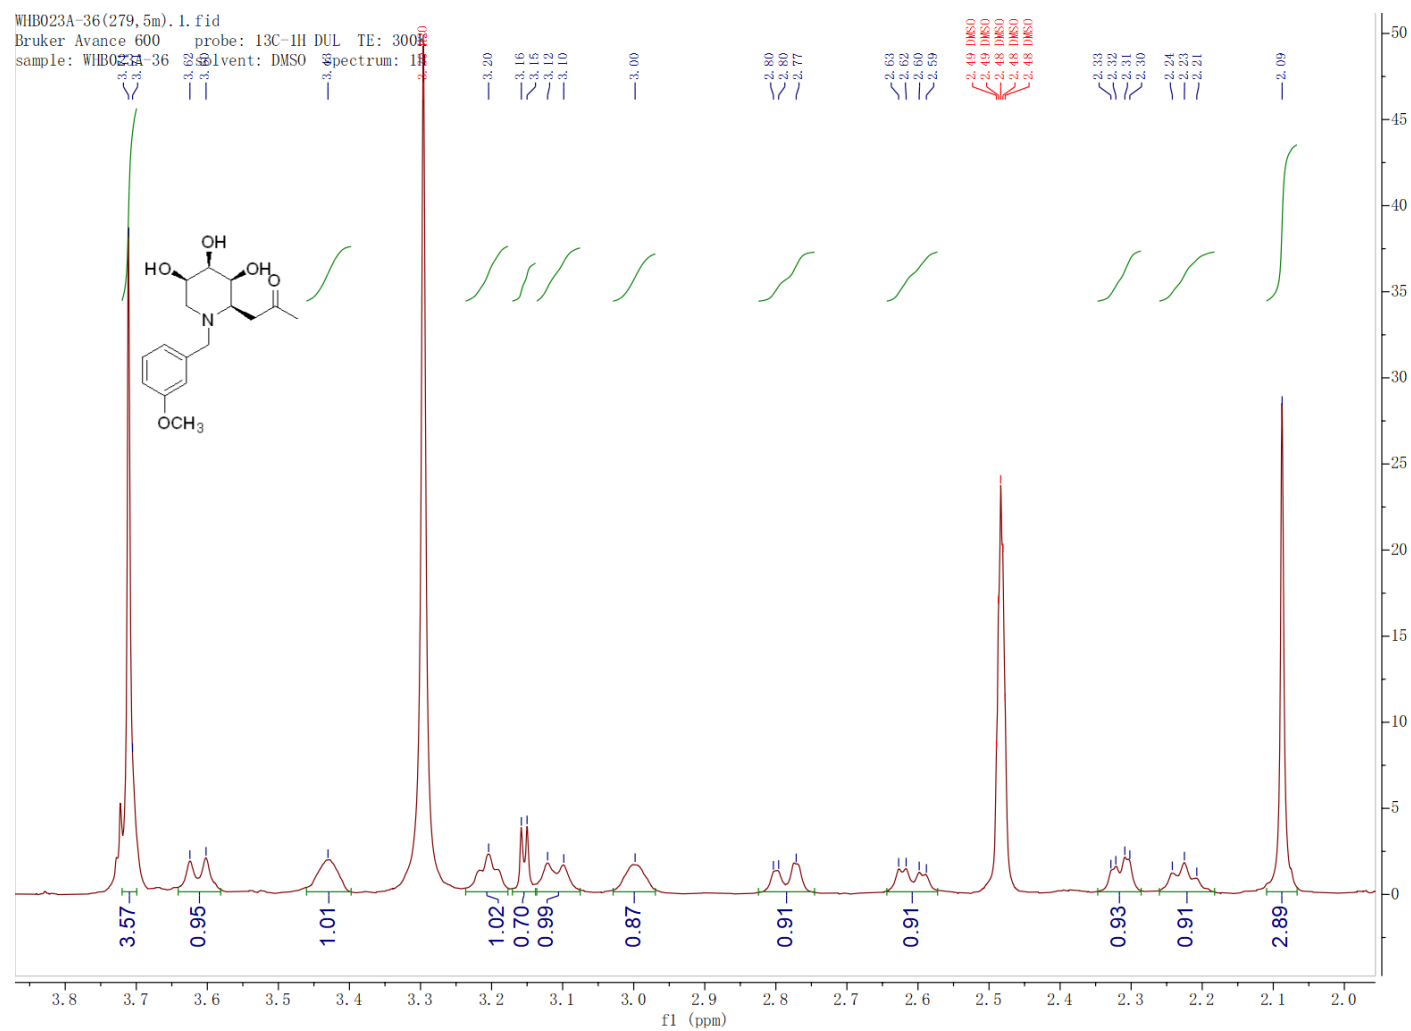

**Figure S61.** Partial region amplification of the  $^1\text{H}$  NMR of compound **5p**.

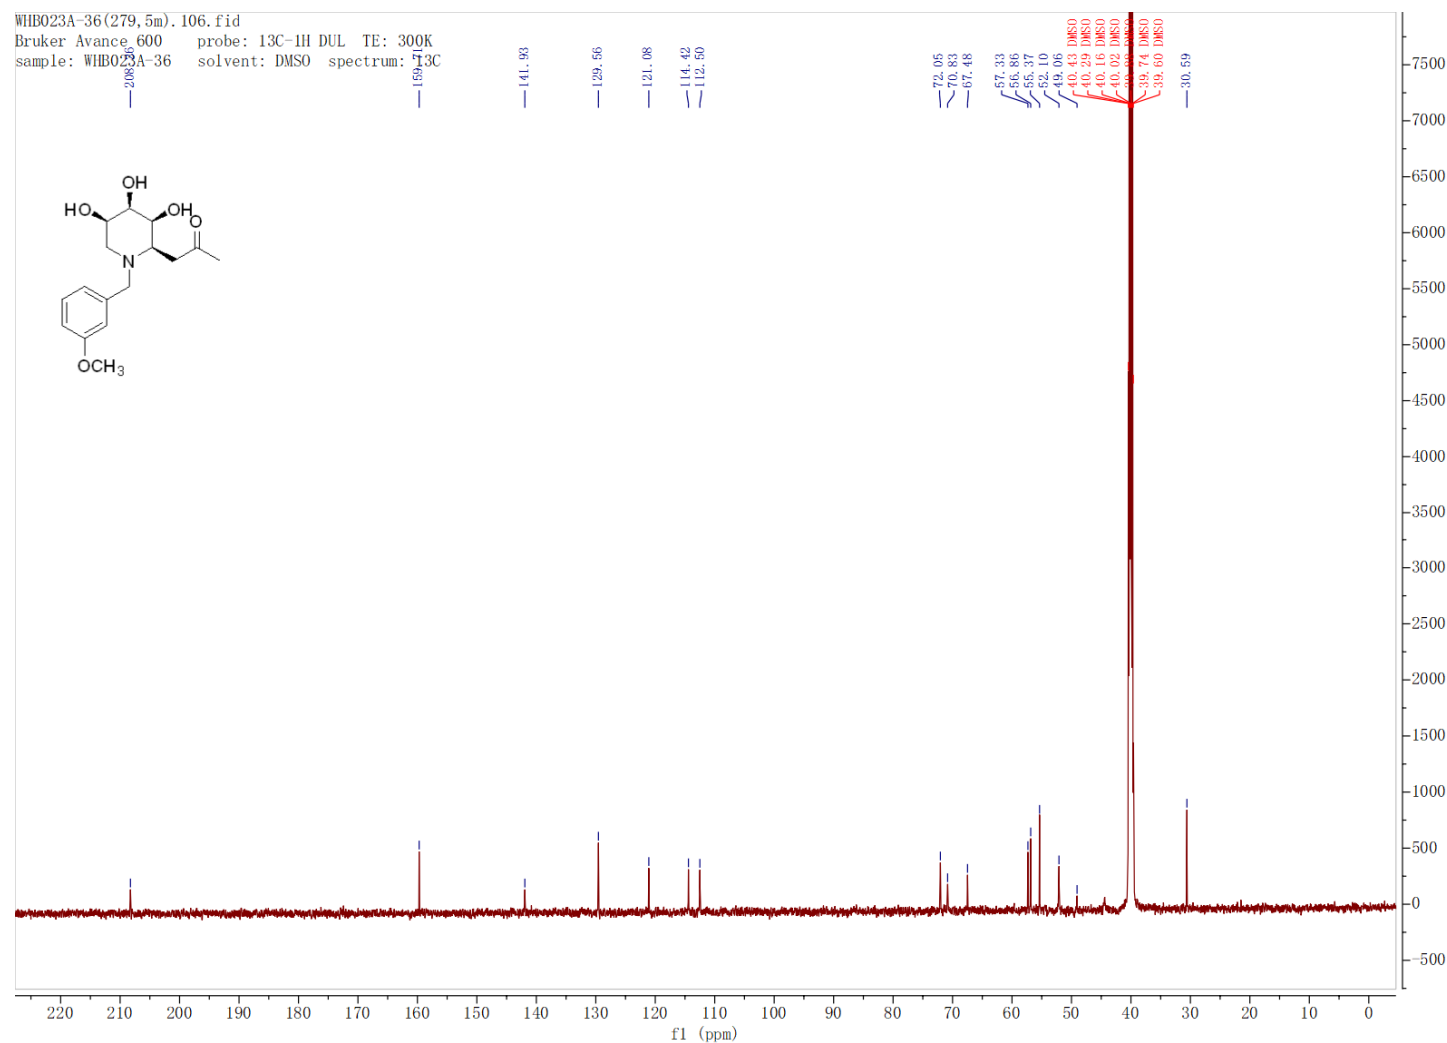

Figure S62. The  $^{13}\text{C}$  NMR of compound 5p.

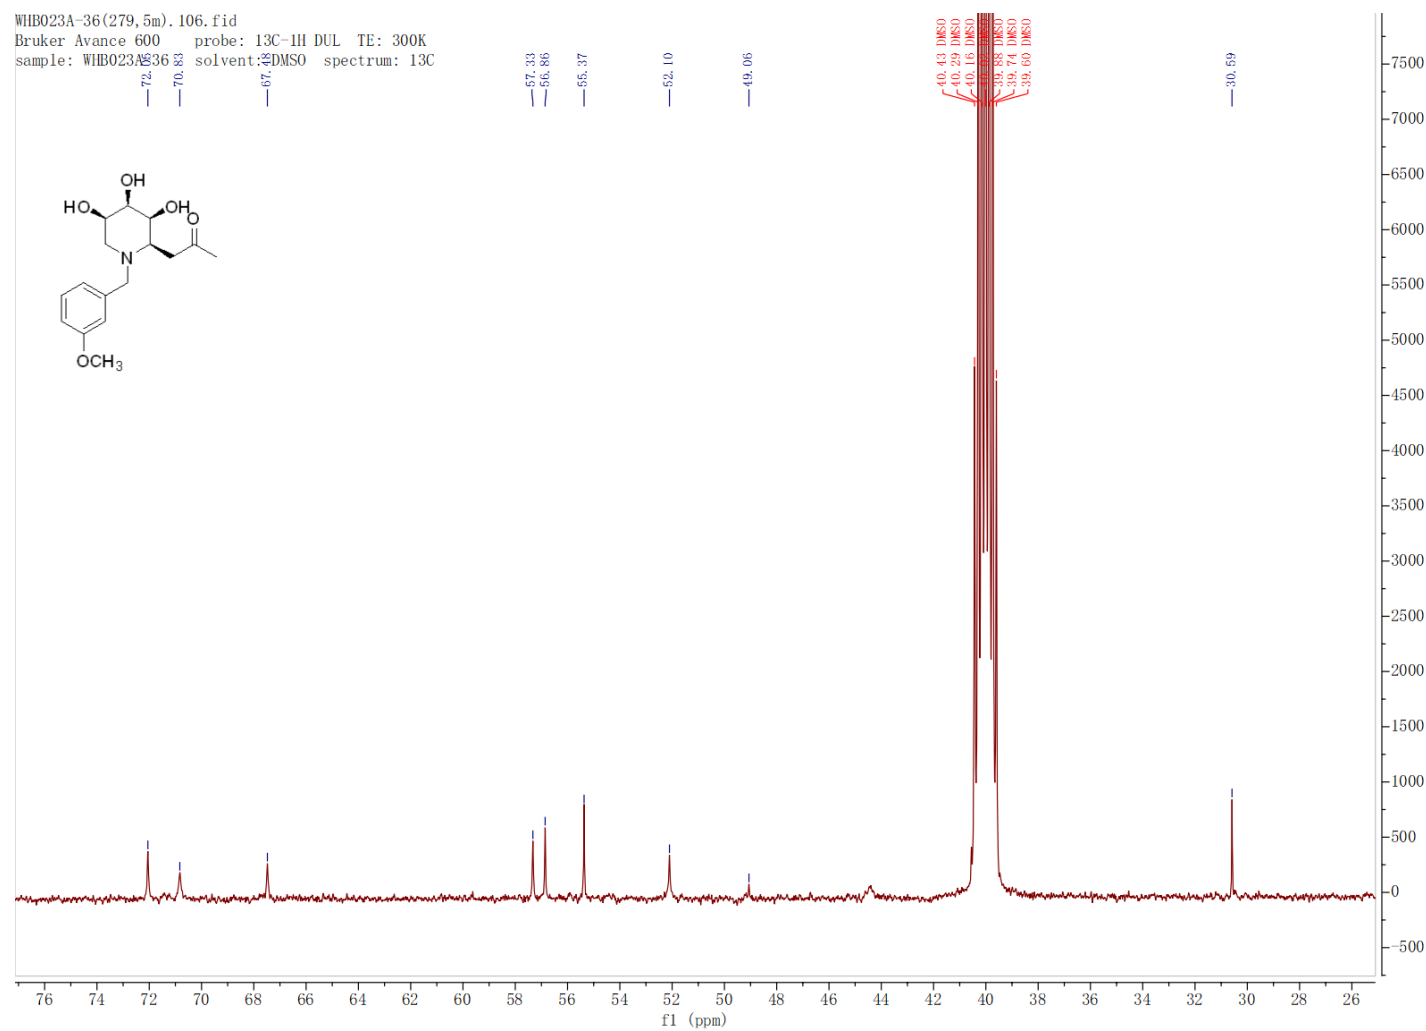

**Figure S63.** Partial region amplification of the  $^{13}\text{C}$  NMR of compound **5p**.

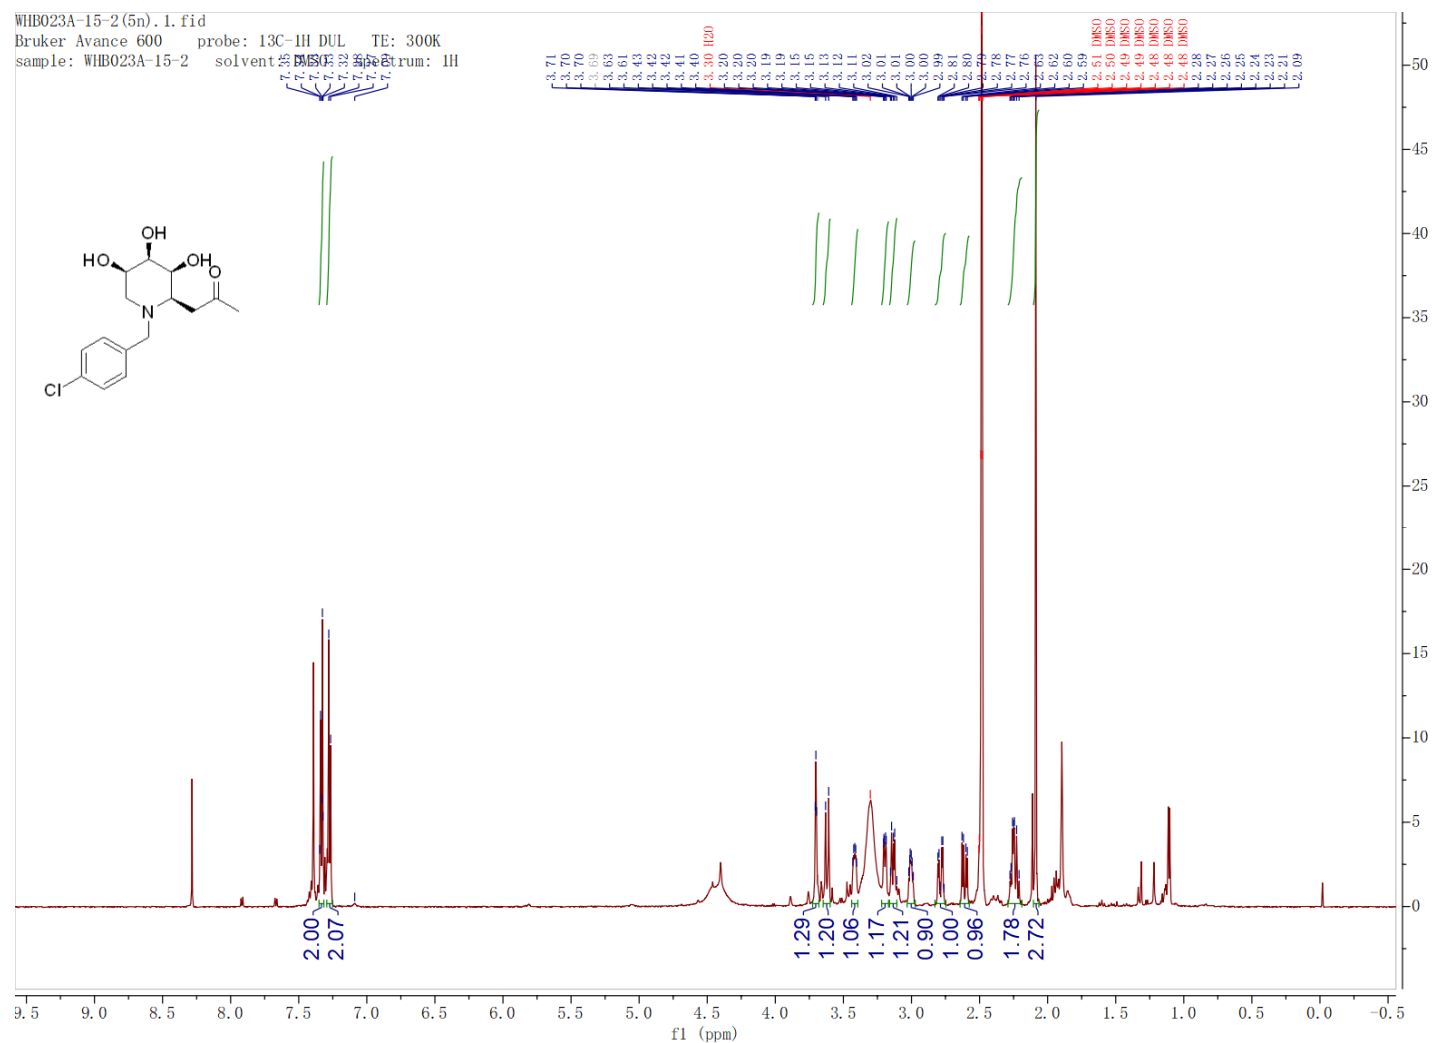

Figure S64. The  $^1\text{H}$  NMR of compound 5q.

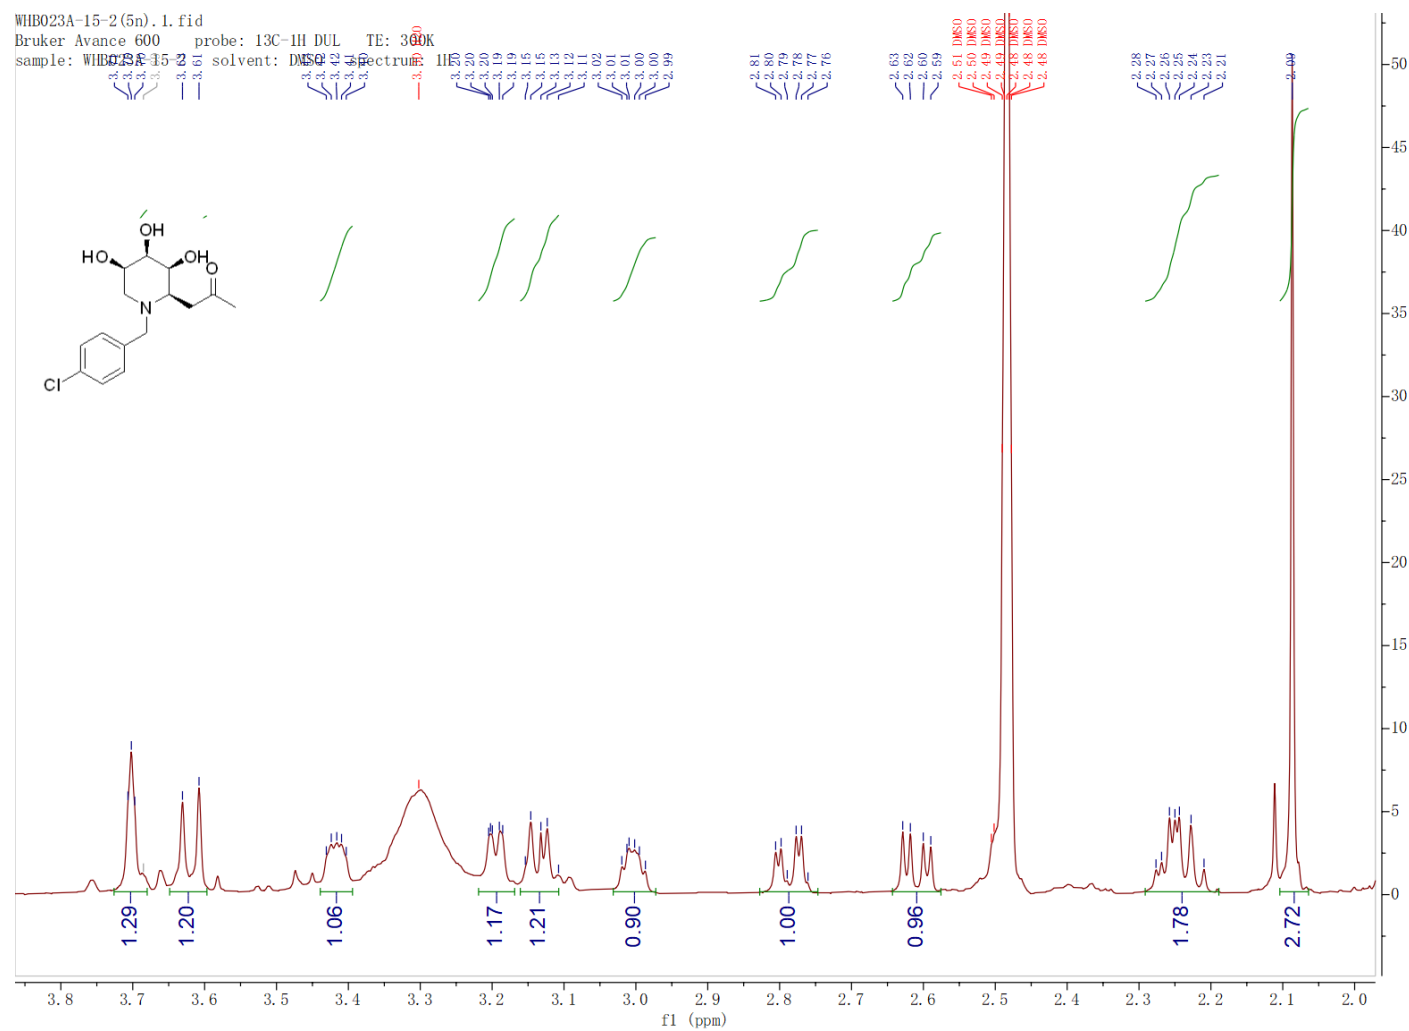

Figure S65. Partial region amplification of the <sup>1</sup>H NMR of compound 5q.

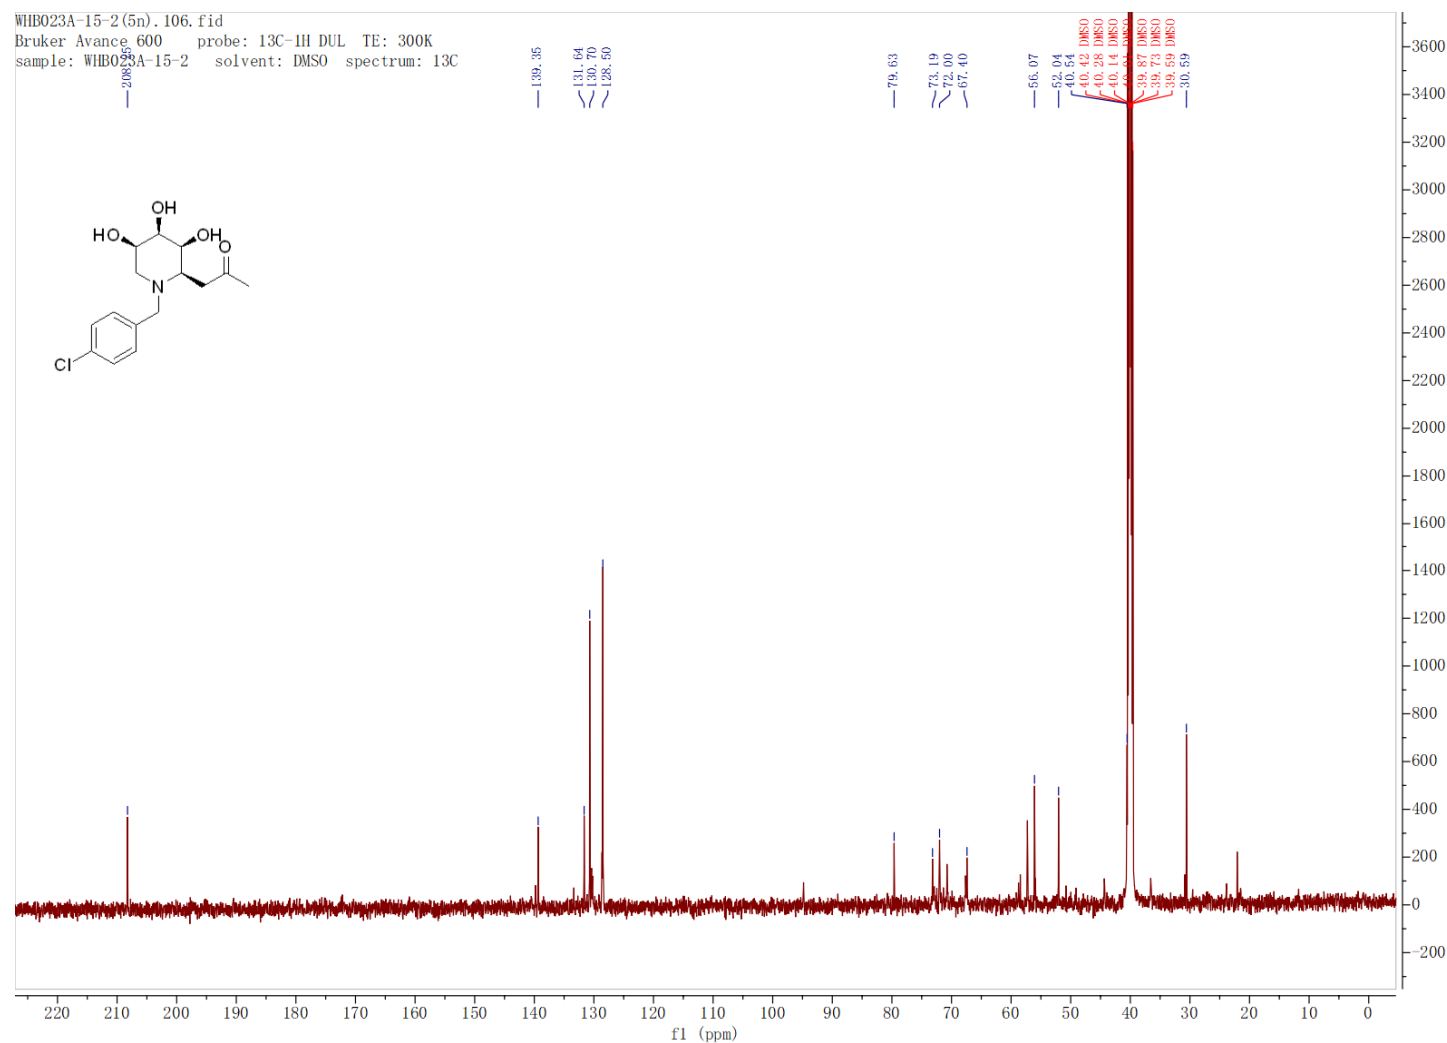

Figure S66. The  $^{13}\text{C}$  NMR of compound 5q.

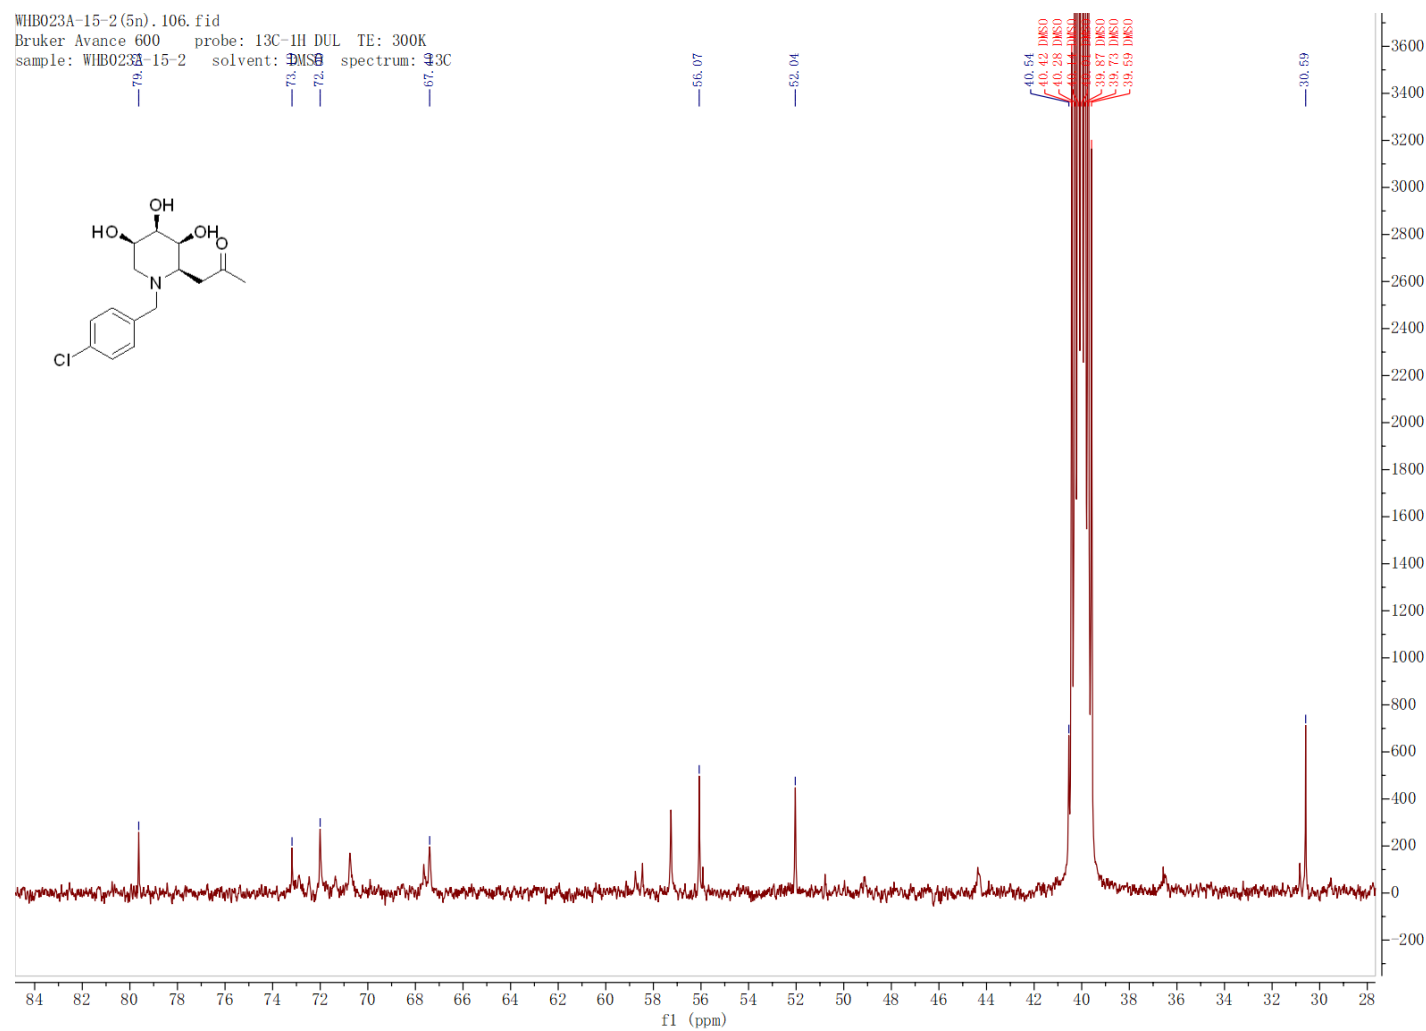

Figure S67. Partial region amplification of the  $^{13}\text{C}$  NMR of compound **5q**.



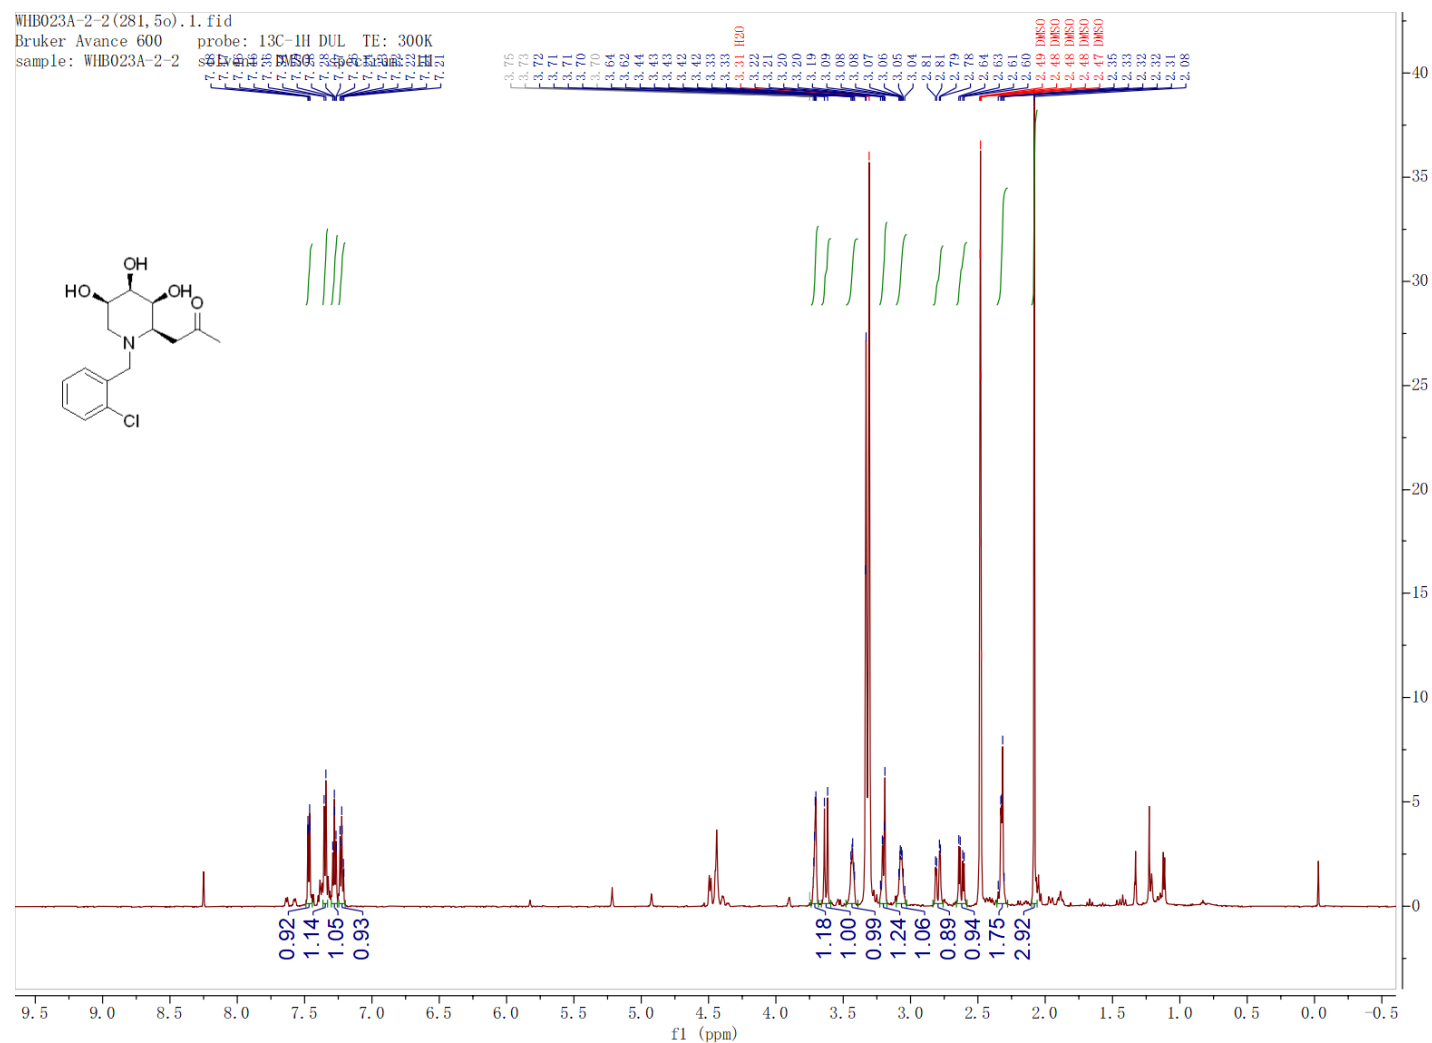

Figure S68. The <sup>1</sup>H NMR of compound 5r.

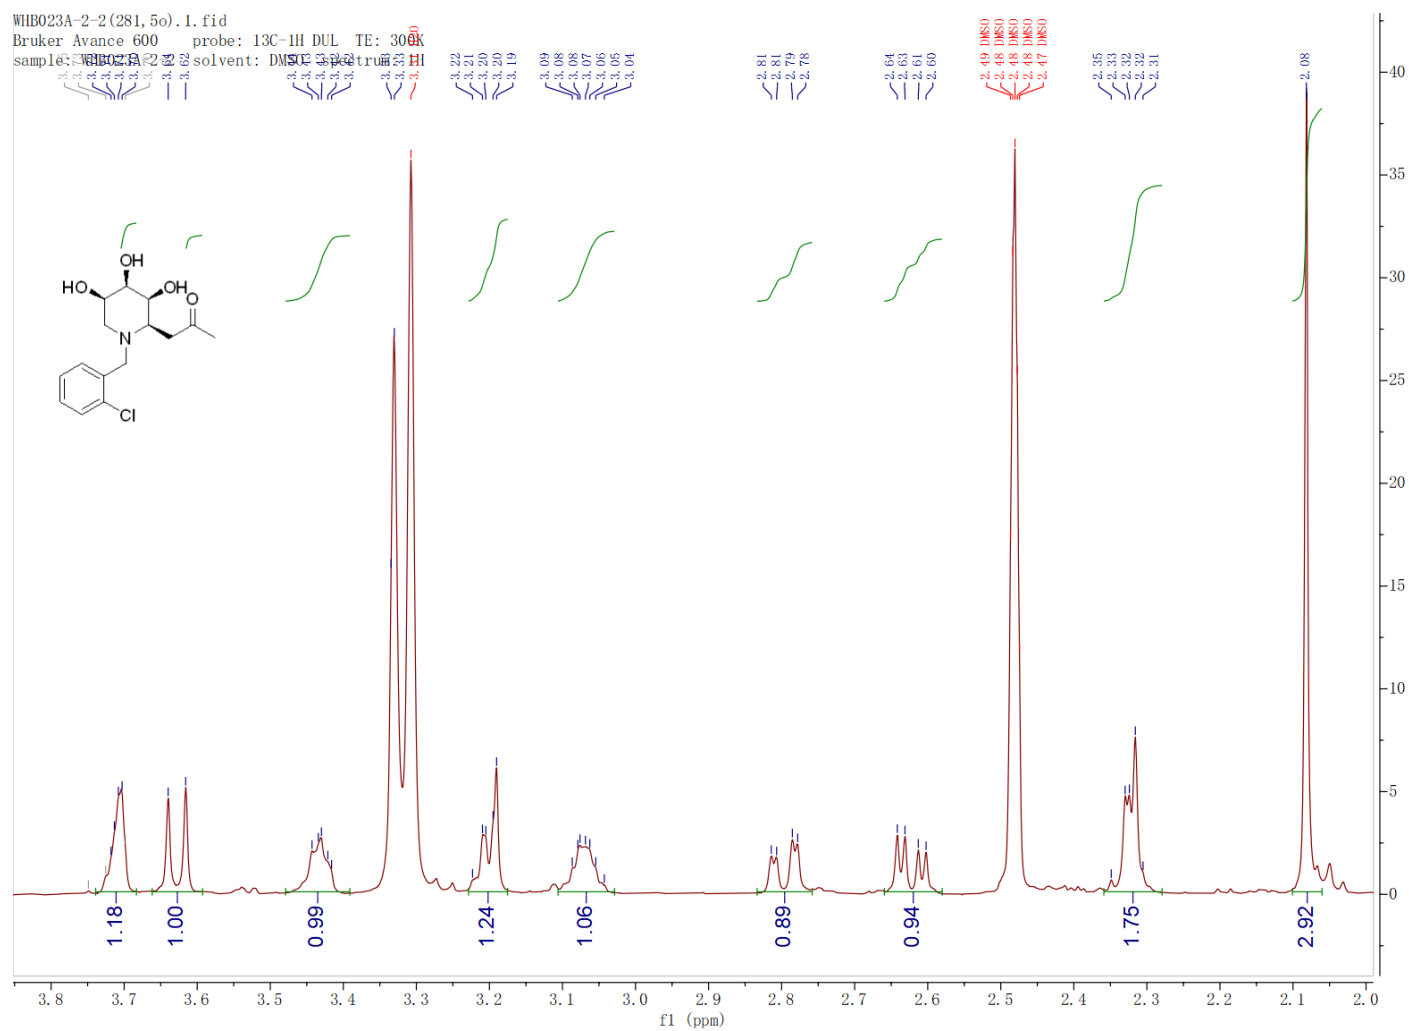

**Figure S69.** Partial region amplification of the  $^1\text{H}$  NMR of compound **5r**.

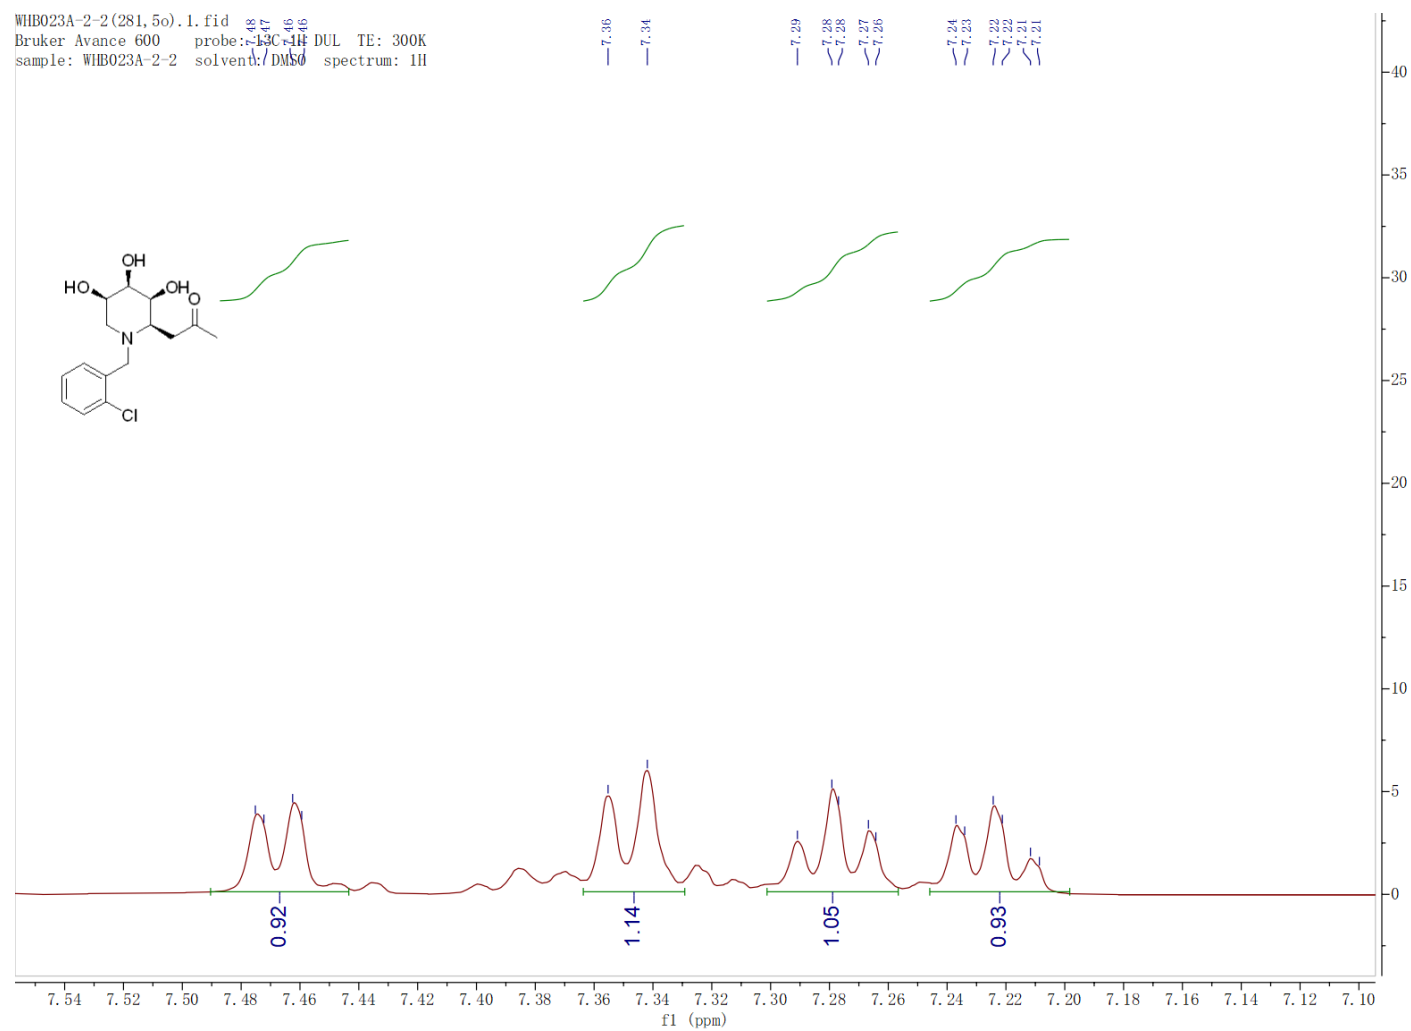

**Figure S70.** Partial region amplification of the  $^1\text{H}$  NMR of compound **5r**.

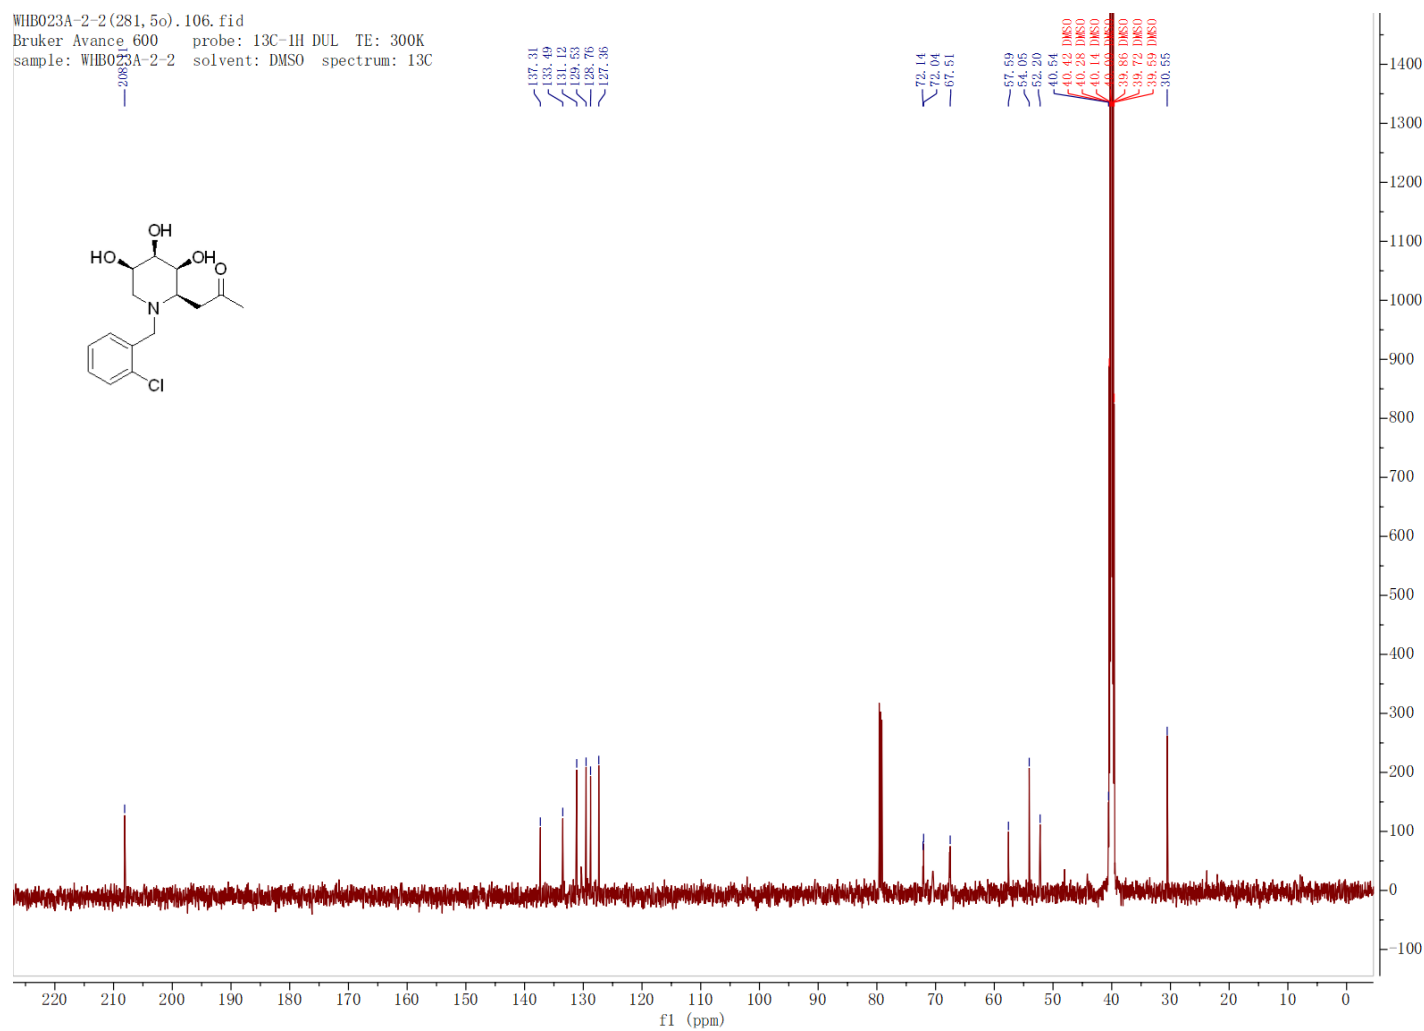

Figure S71. The  $^{13}\text{C}$  NMR of compound 5r.

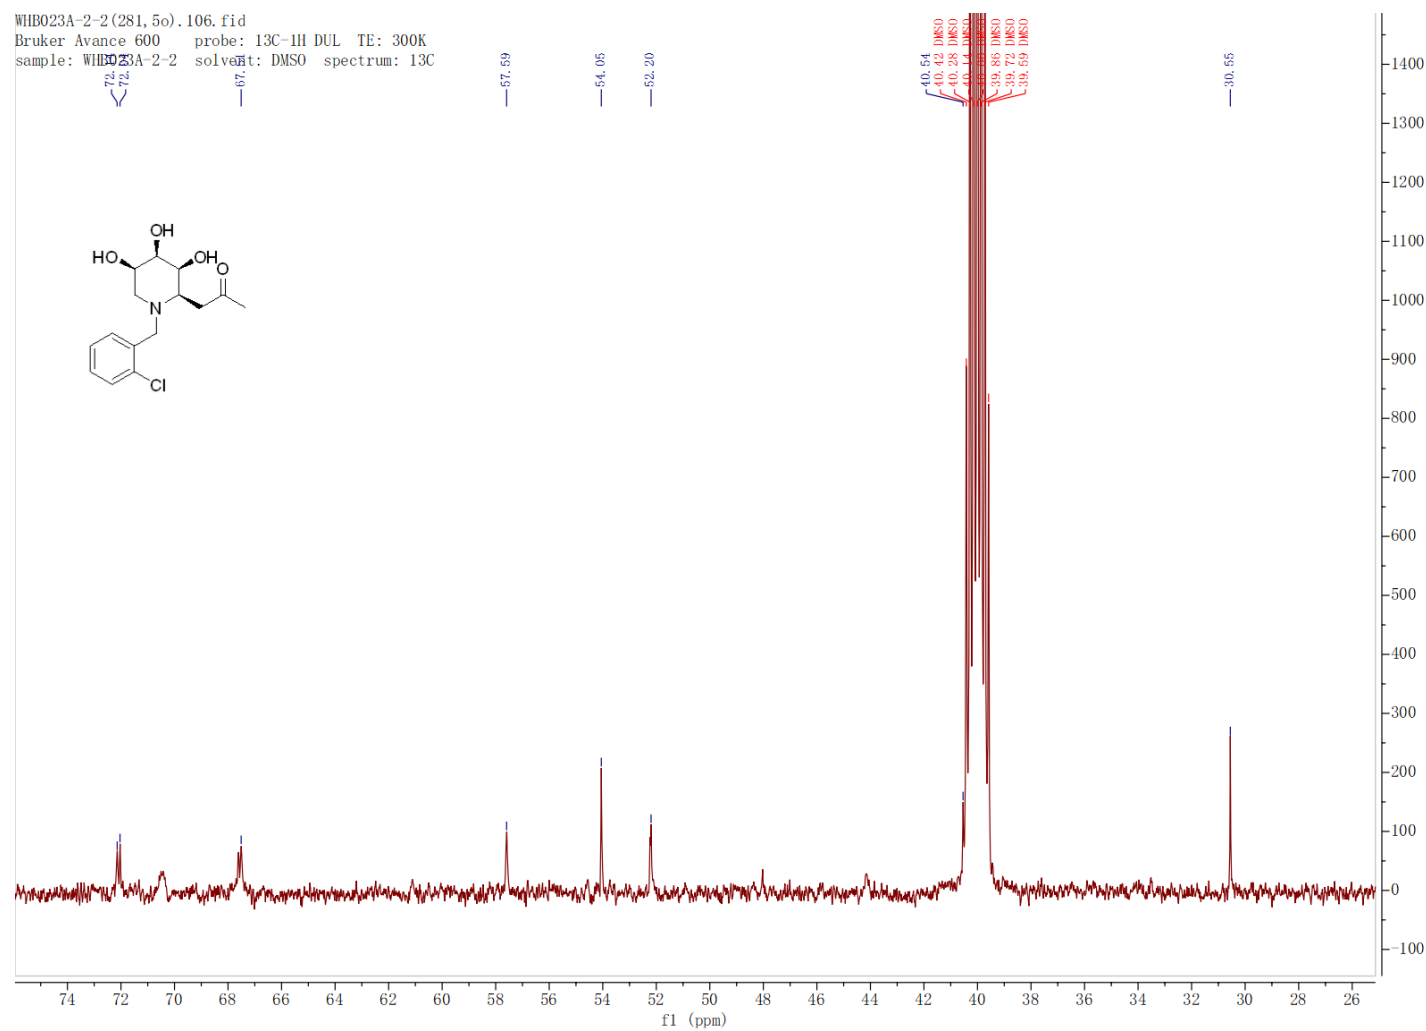

**Figure S72.** Partial region amplification of the  $^{13}\text{C}$  NMR of compound **5r**.

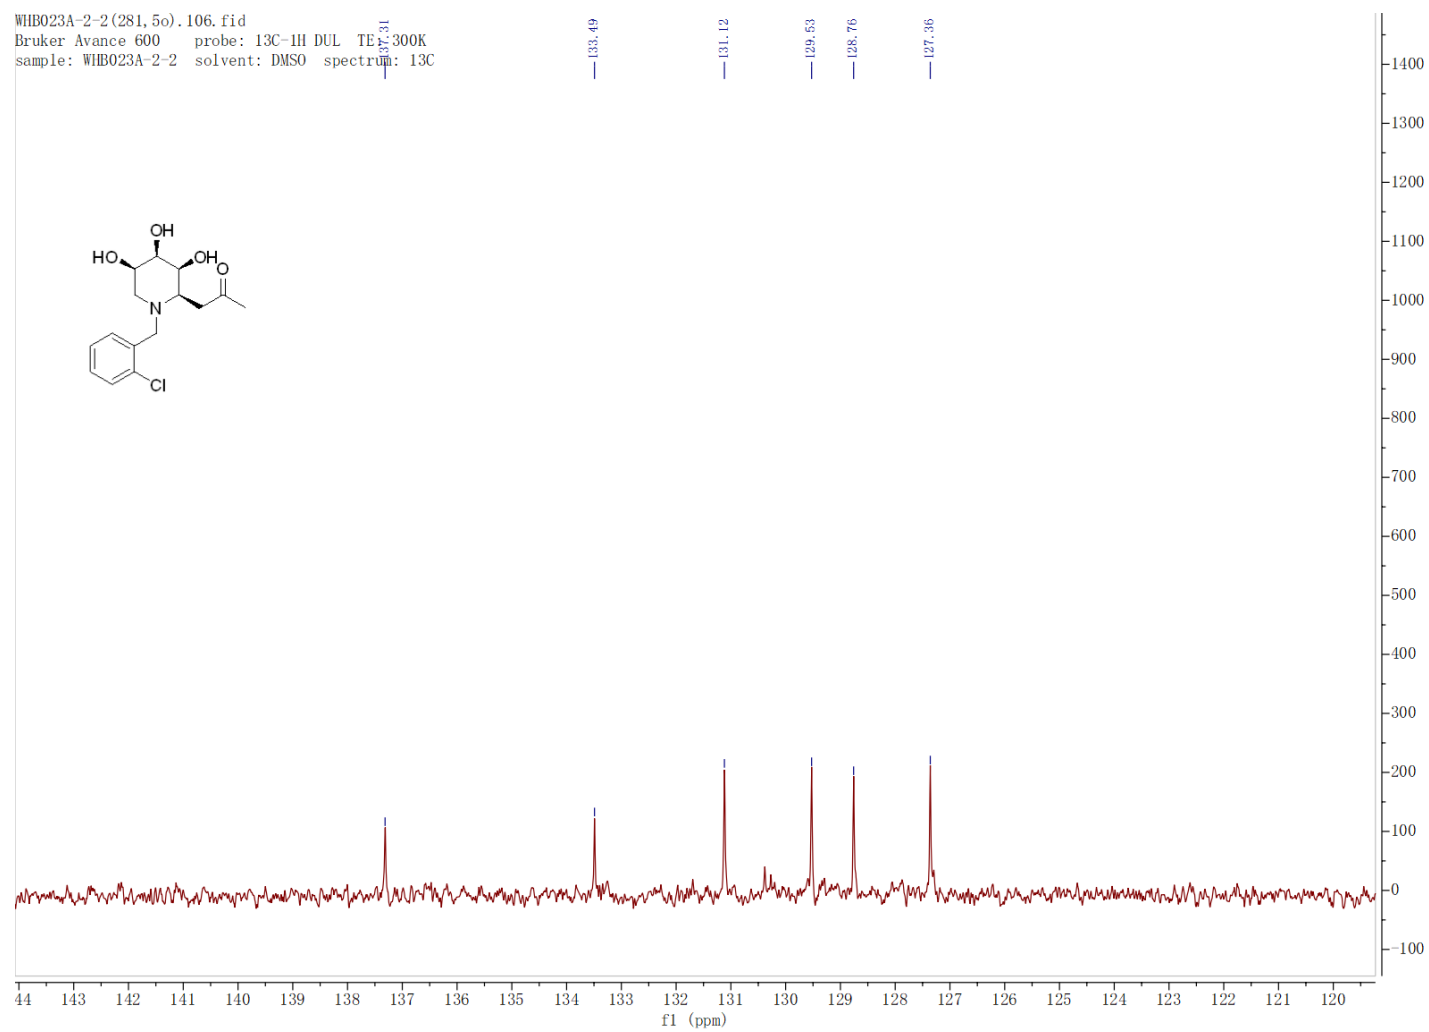

**Figure S73.** Partial region amplification of the  $^{13}\text{C}$  NMR of compound **5r**.

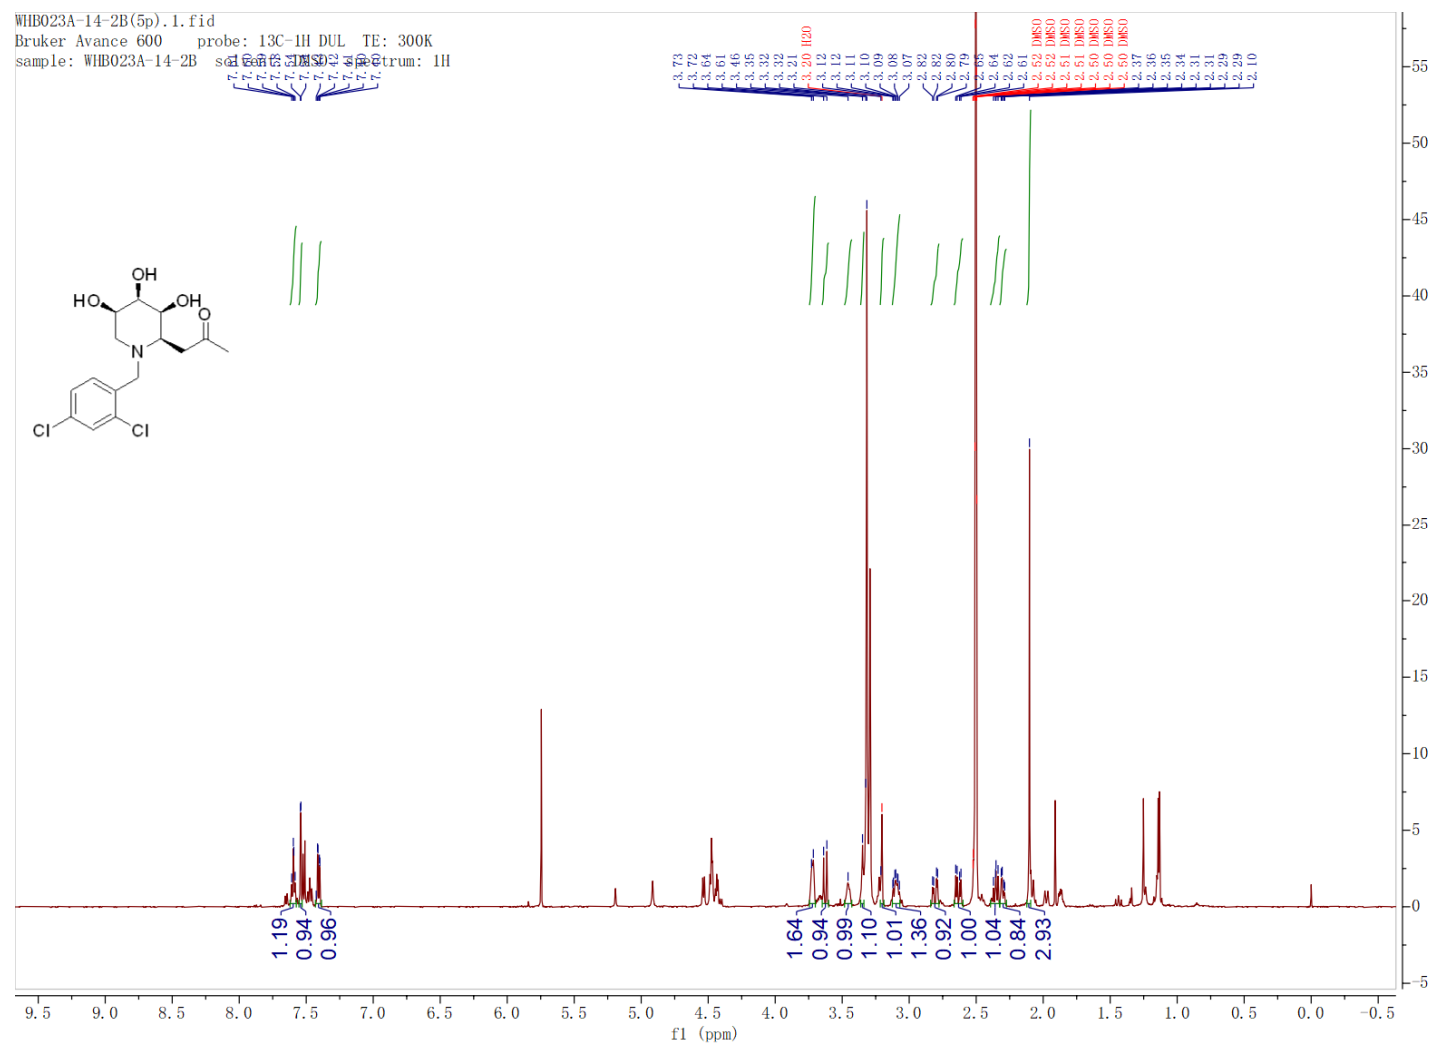

Figure S74. The  $^1\text{H}$  NMR of compound 5s.

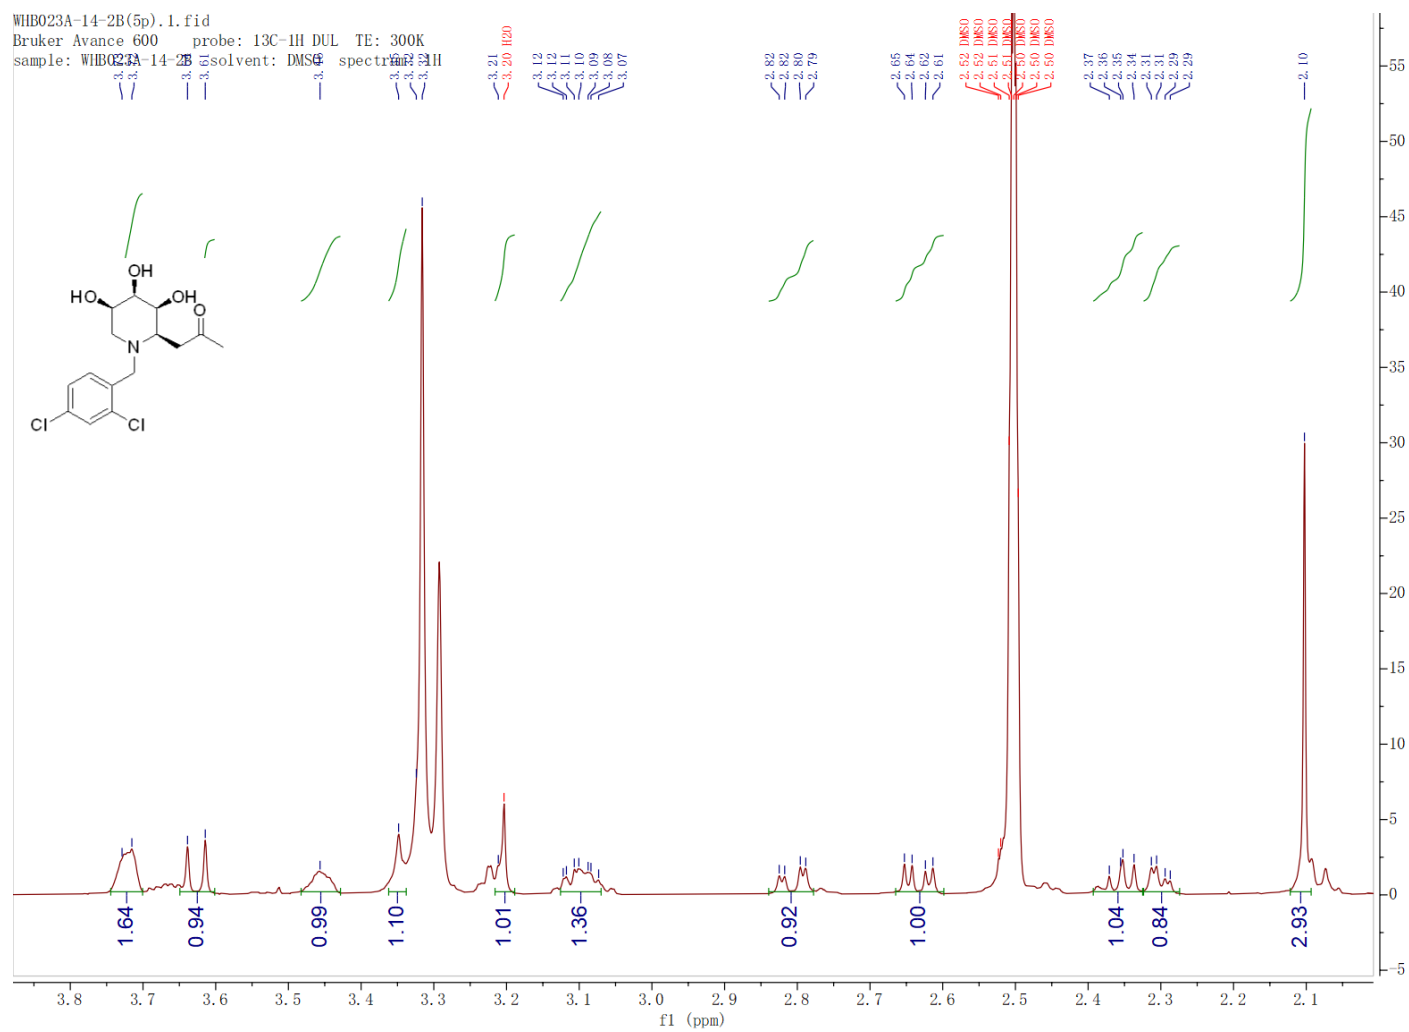

Figure S75. Partial region amplification of the  $^1\text{H}$  NMR of compound 5s.



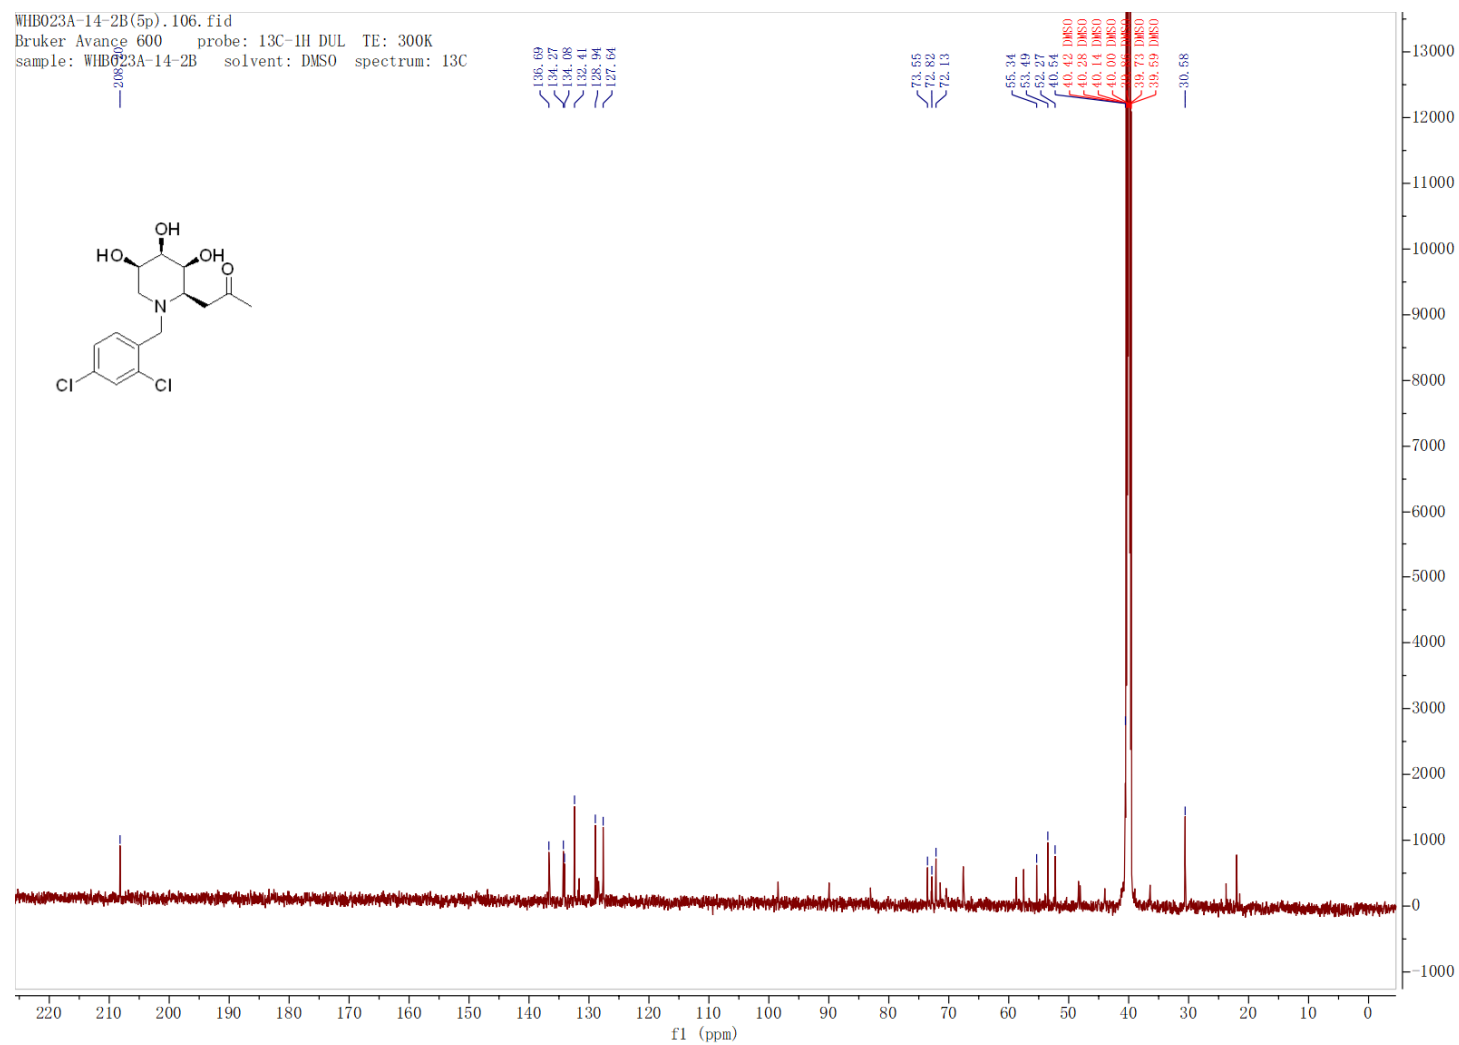

Figure S76. The  $^{13}\text{C}$  NMR of compound 5s.

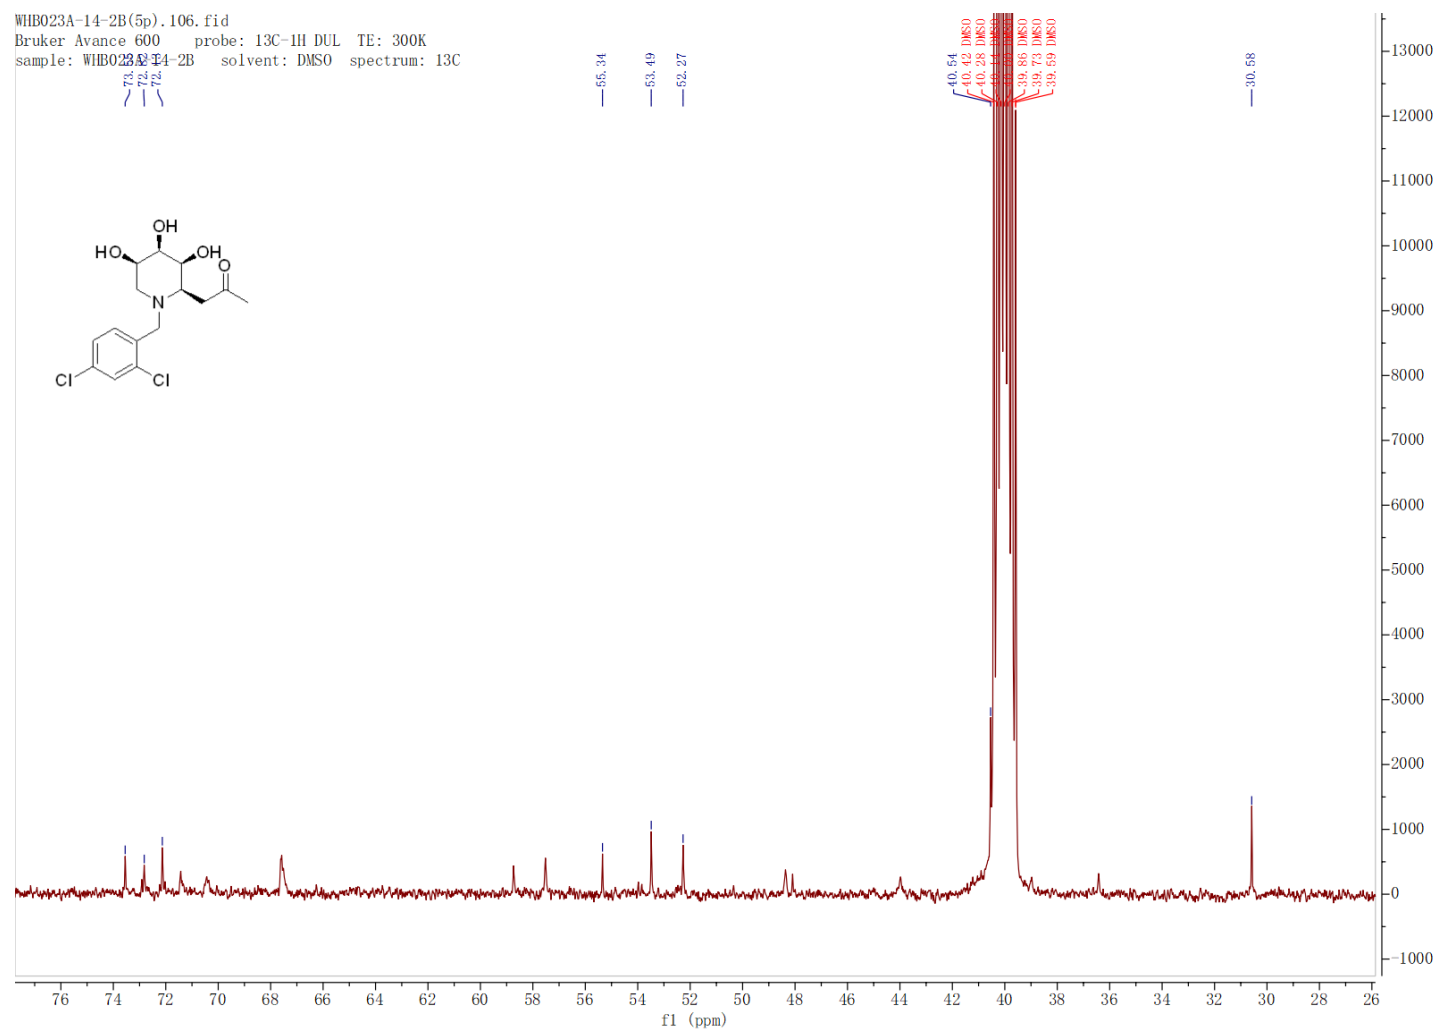

**Figure S77.** Partial region amplification of the  $^{13}\text{C}$  NMR of compound **5s**.

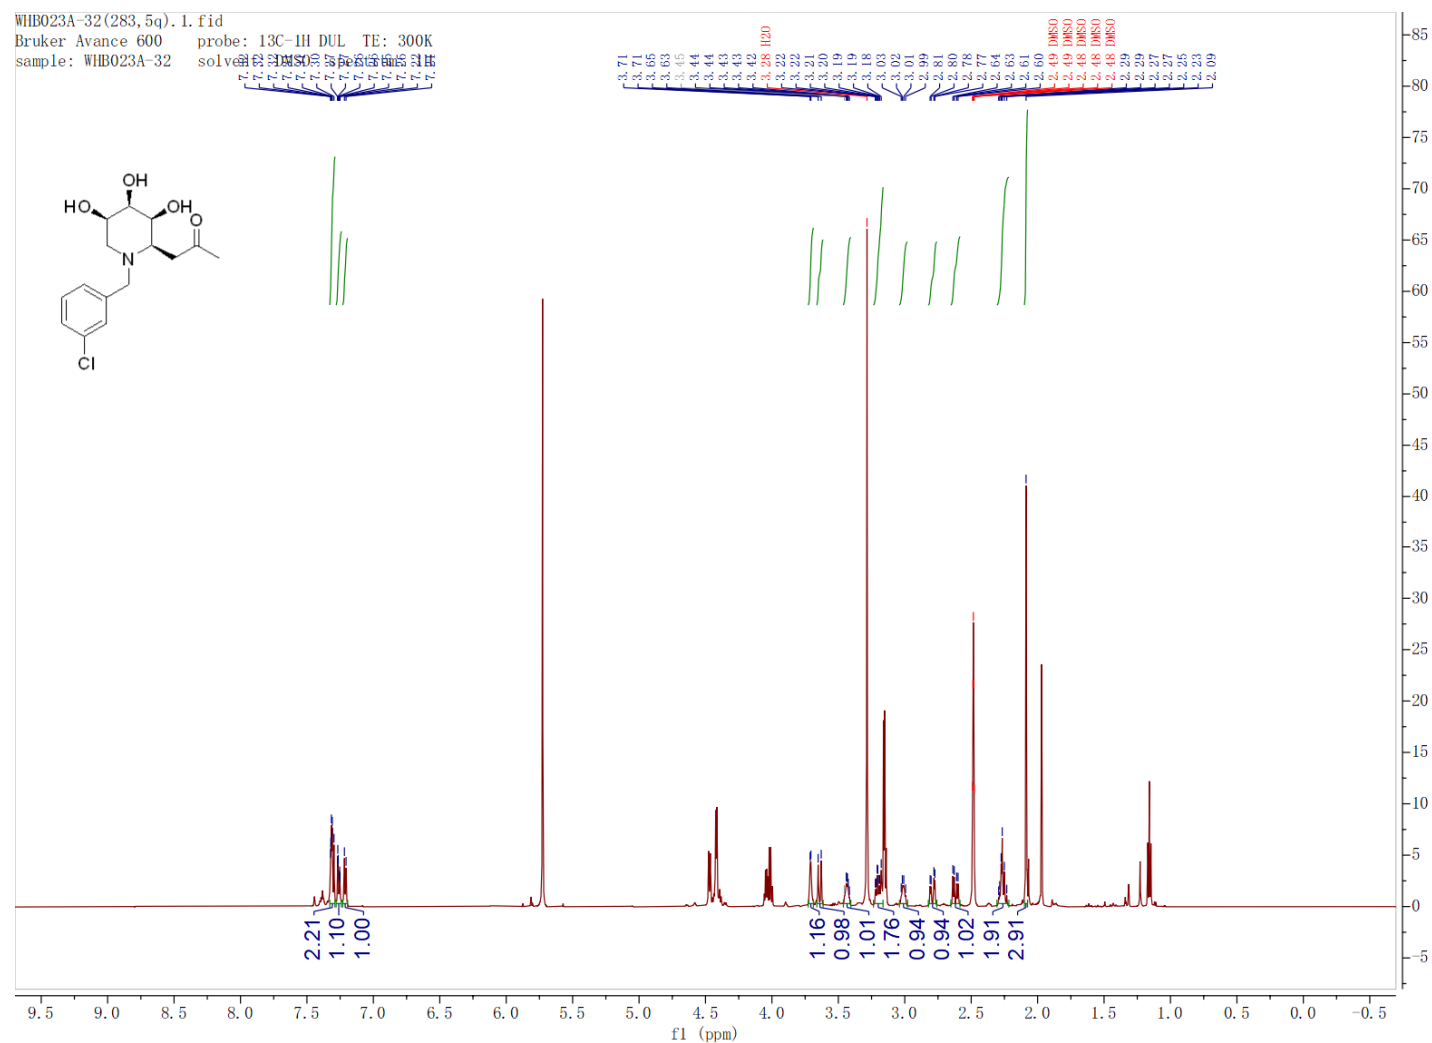

Figure S78. The <sup>1</sup>H NMR of compound 5t.

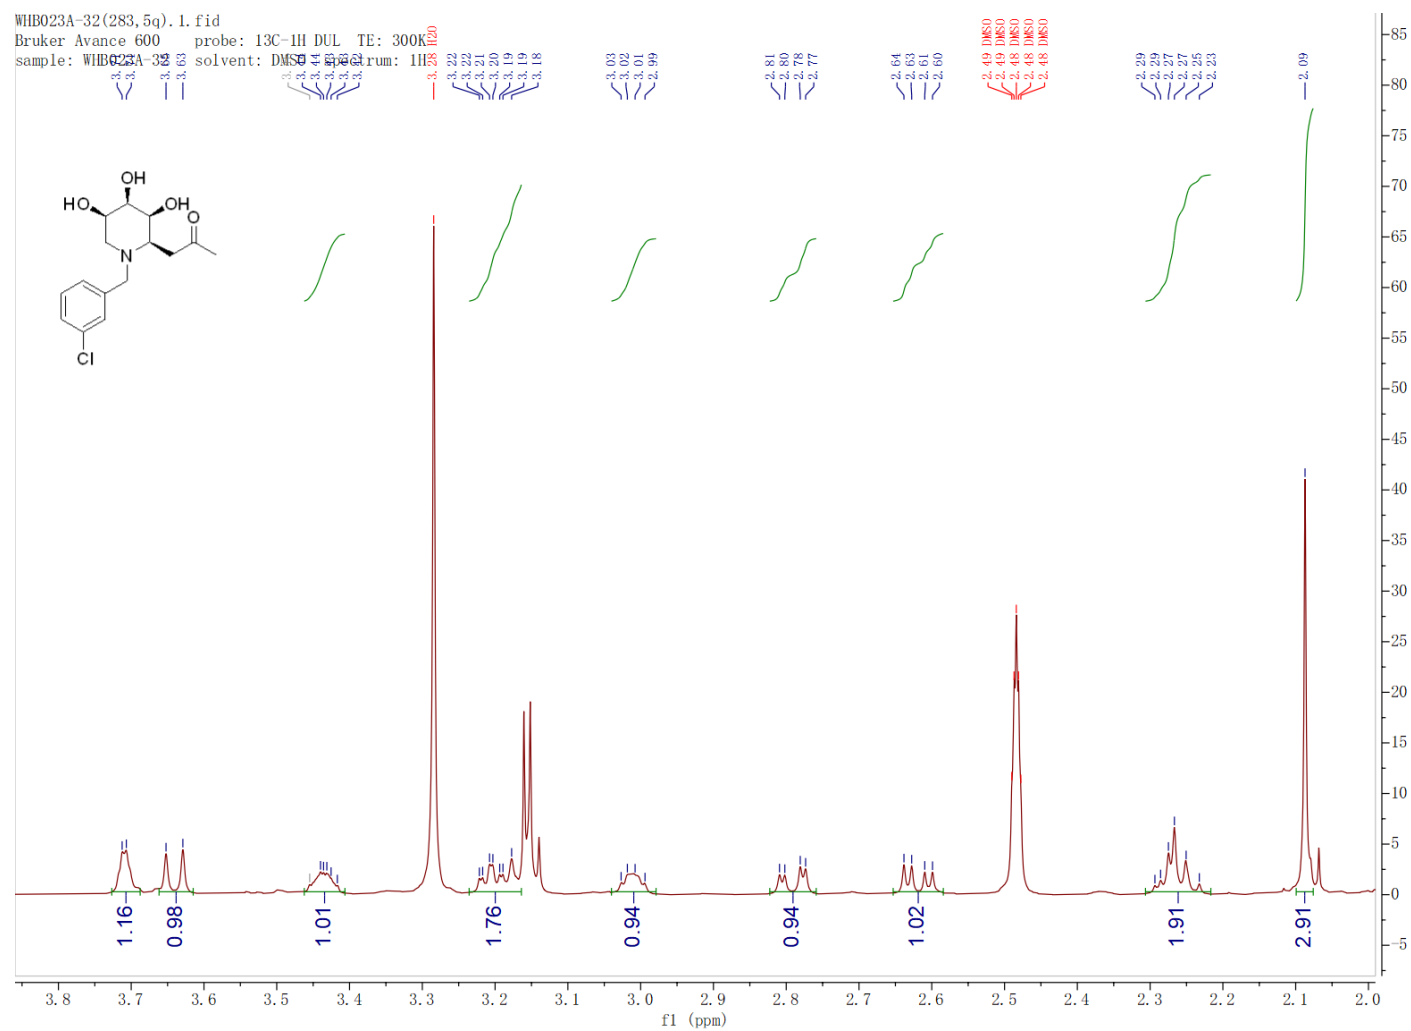

Figure S79. Partial region amplification of the  $^1\text{H}$  NMR of compound 5t.

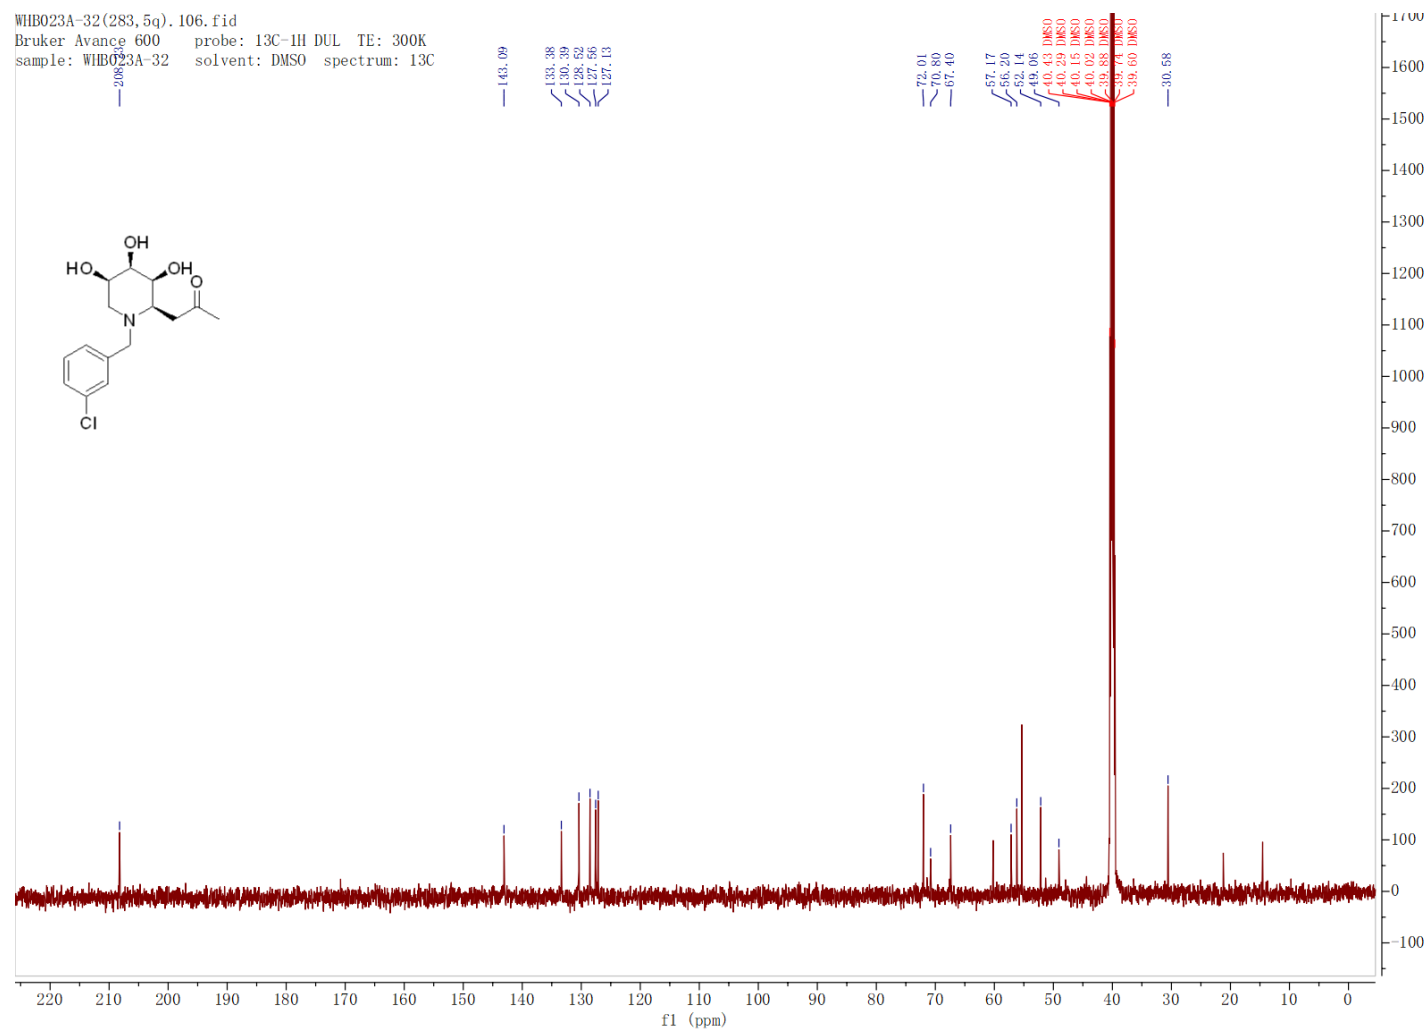

Figure S80. The  $^{13}\text{C}$  NMR of compound 5t.

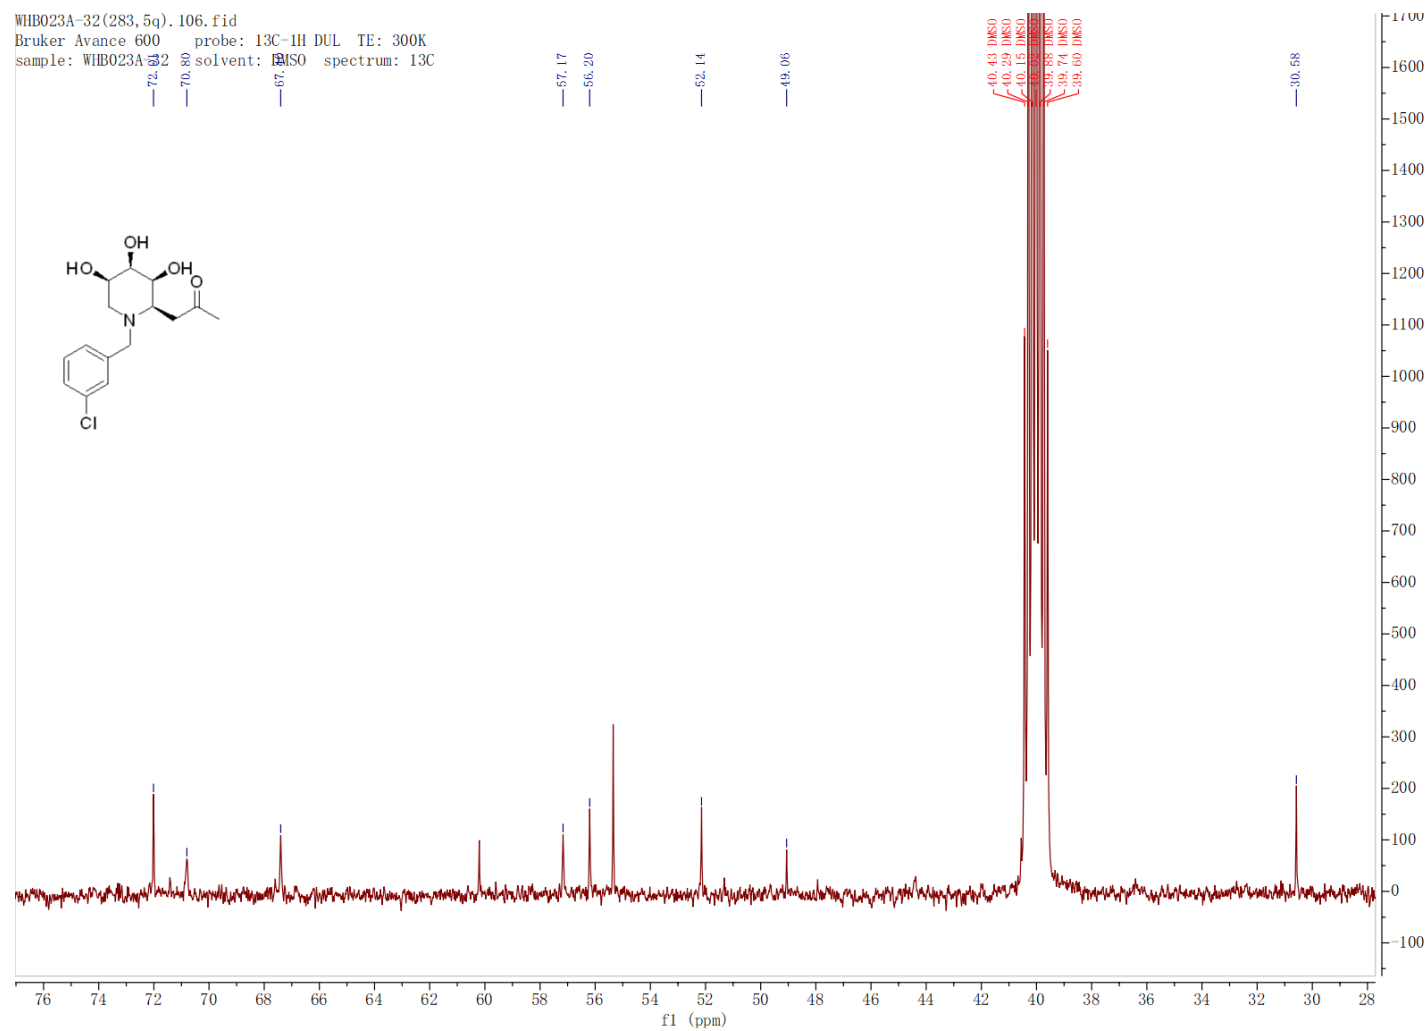

**Figure S81.** Partial region amplification of the  $^{13}\text{C}$  NMR of compound **5t**.

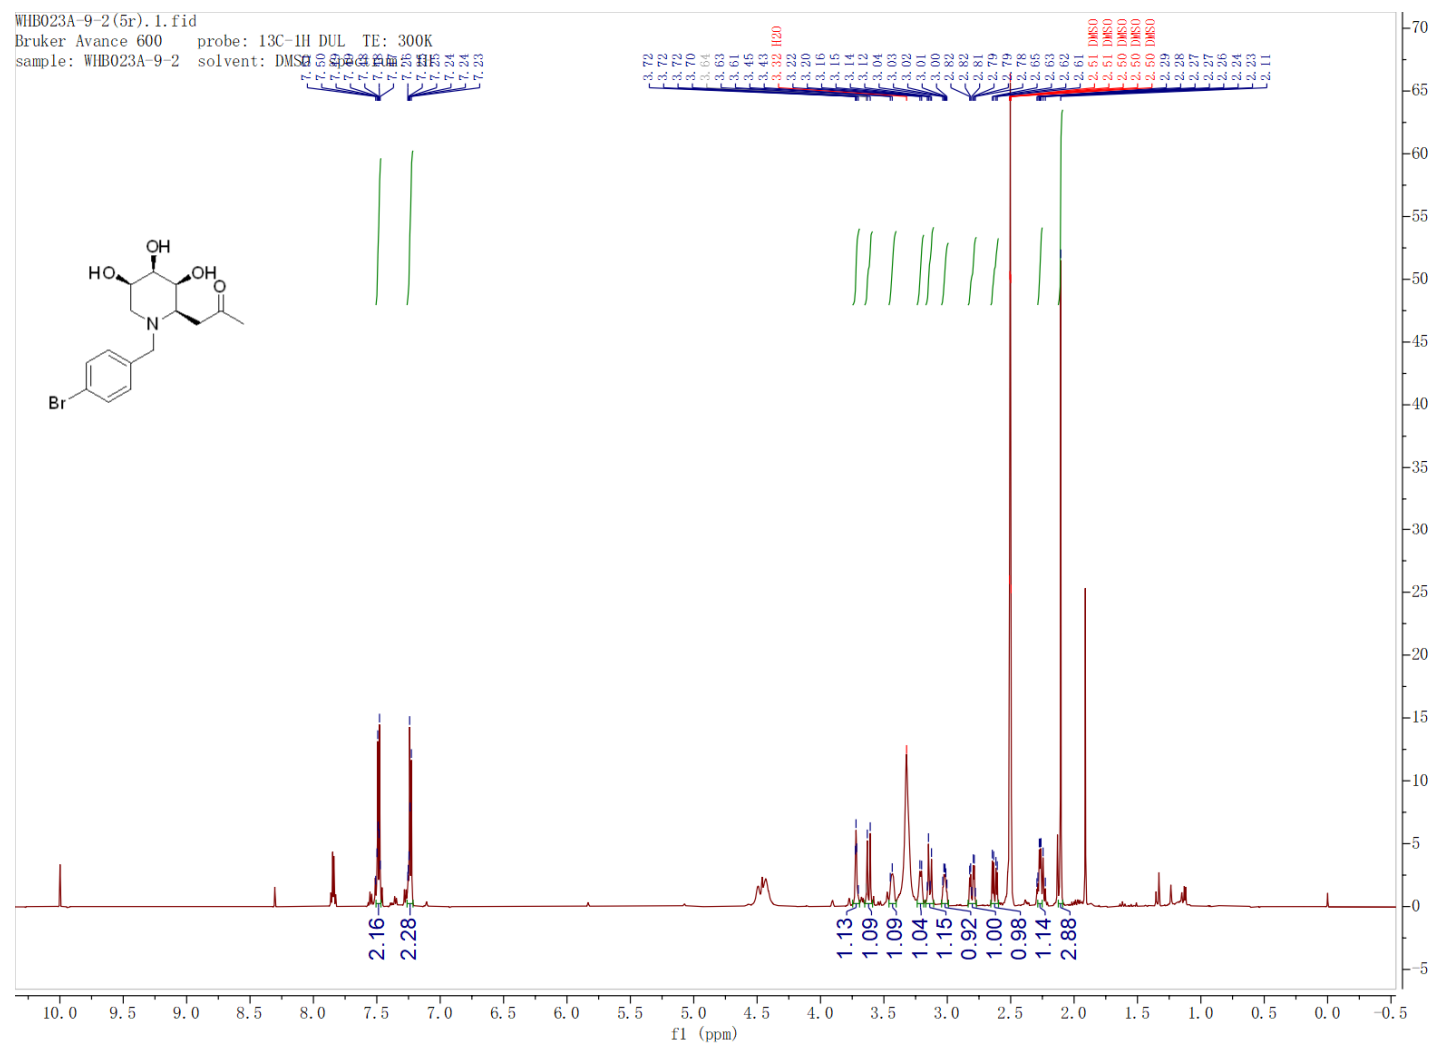

Figure S82. The  $^1\text{H}$  NMR of compound 5u.

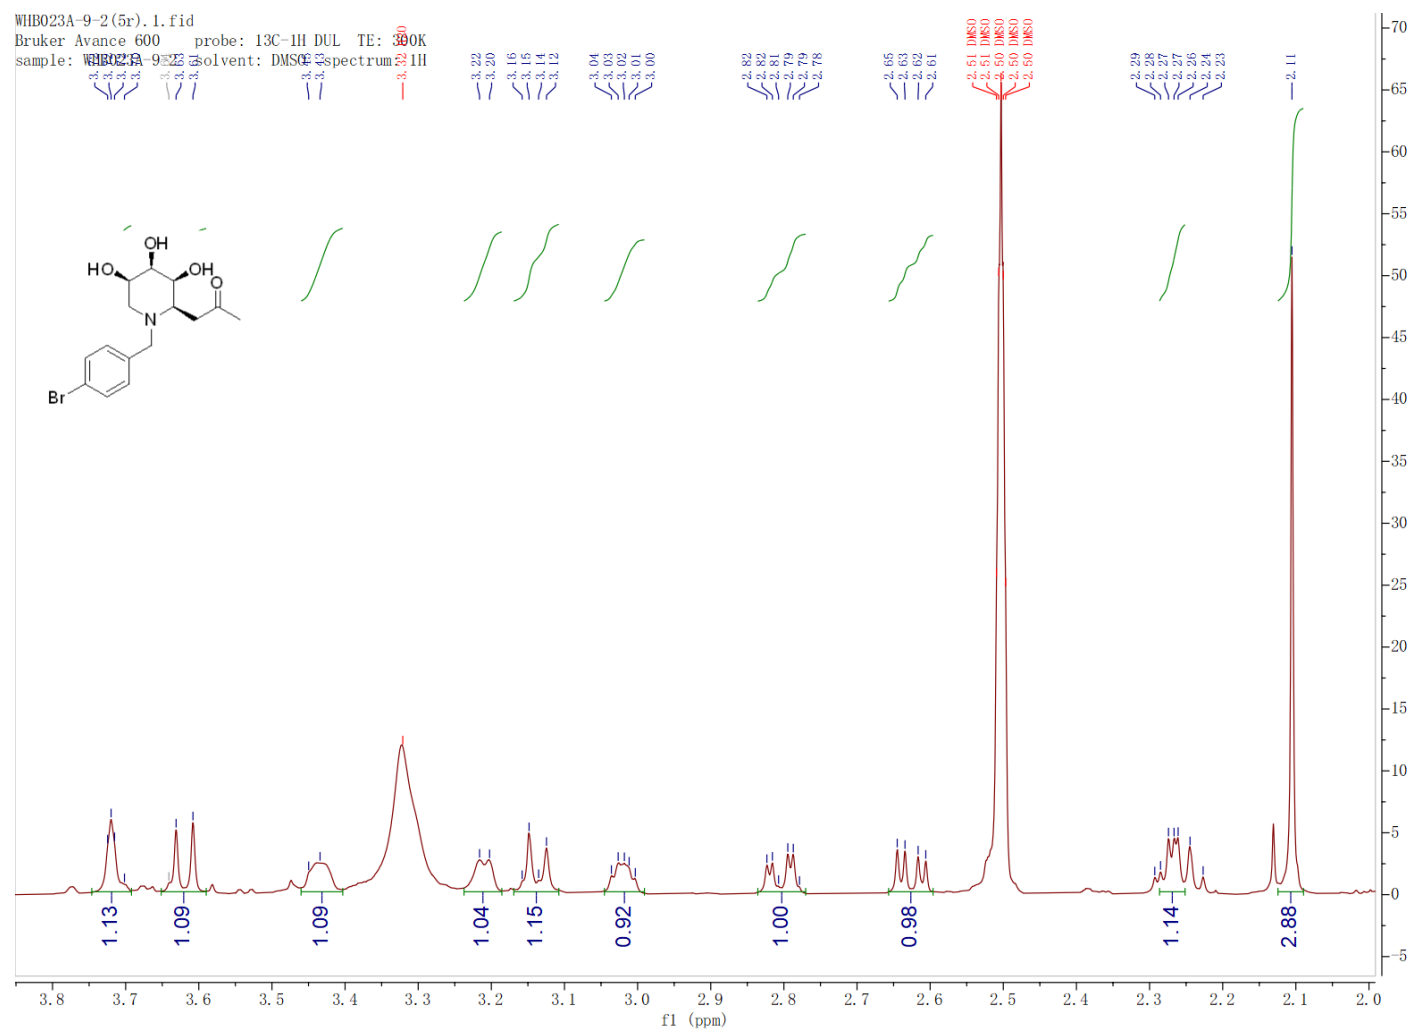

Figure S83. Partial region amplification of the  $^1\text{H}$  NMR of compound 5u.



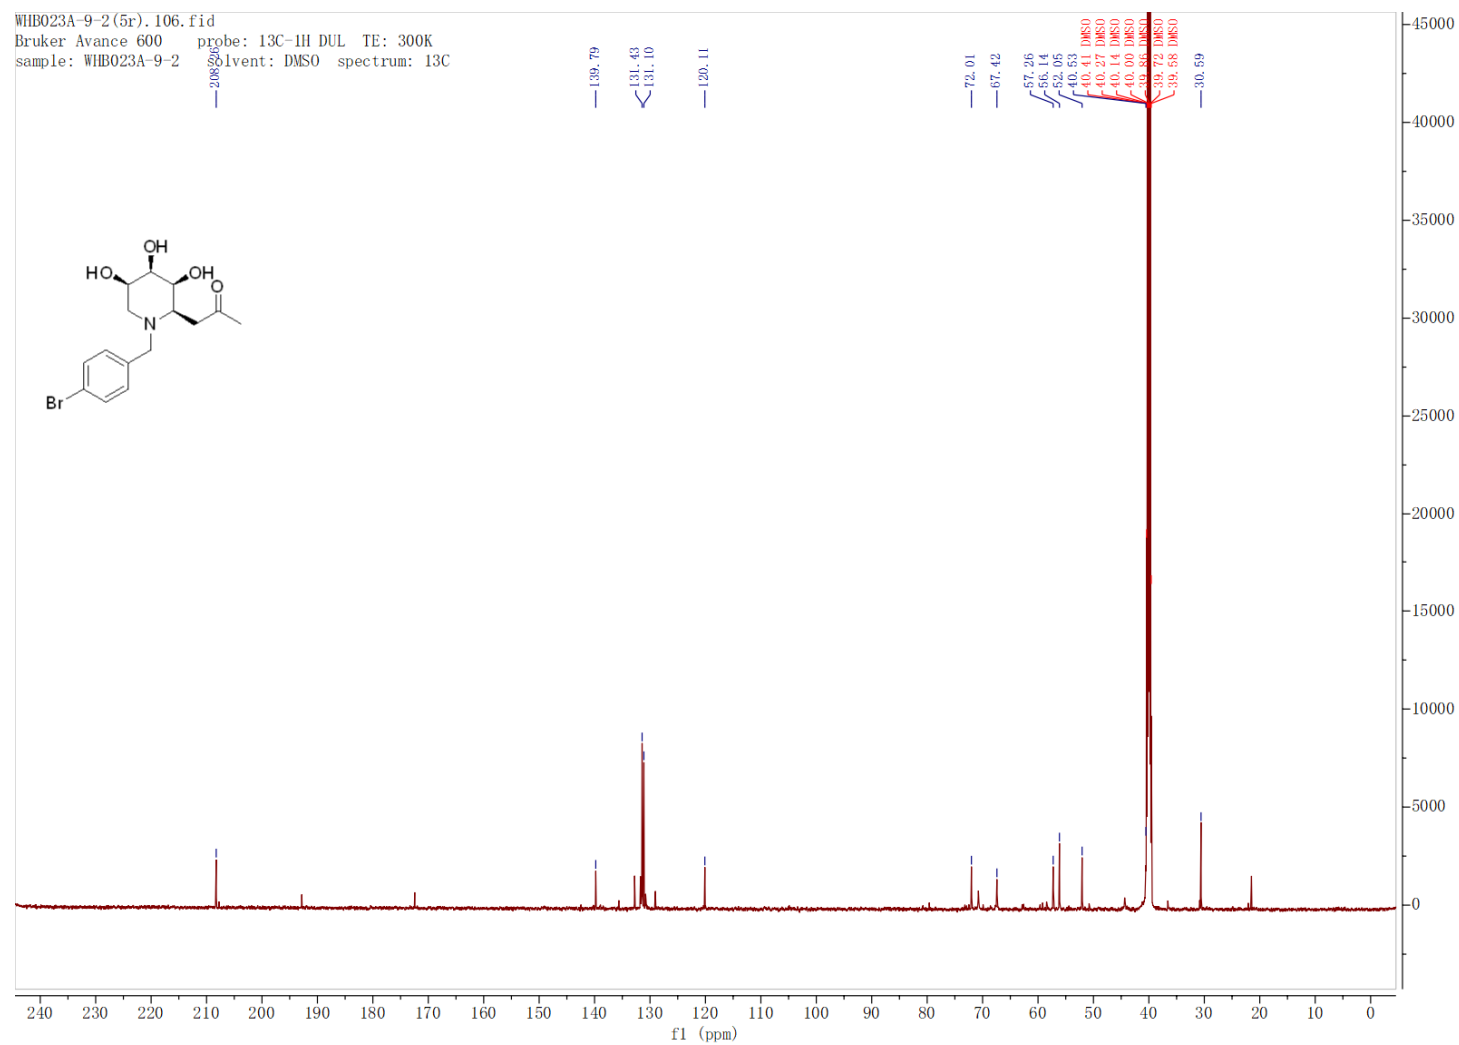

Figure S84. The  $^{13}\text{C}$  NMR of compound 5u.

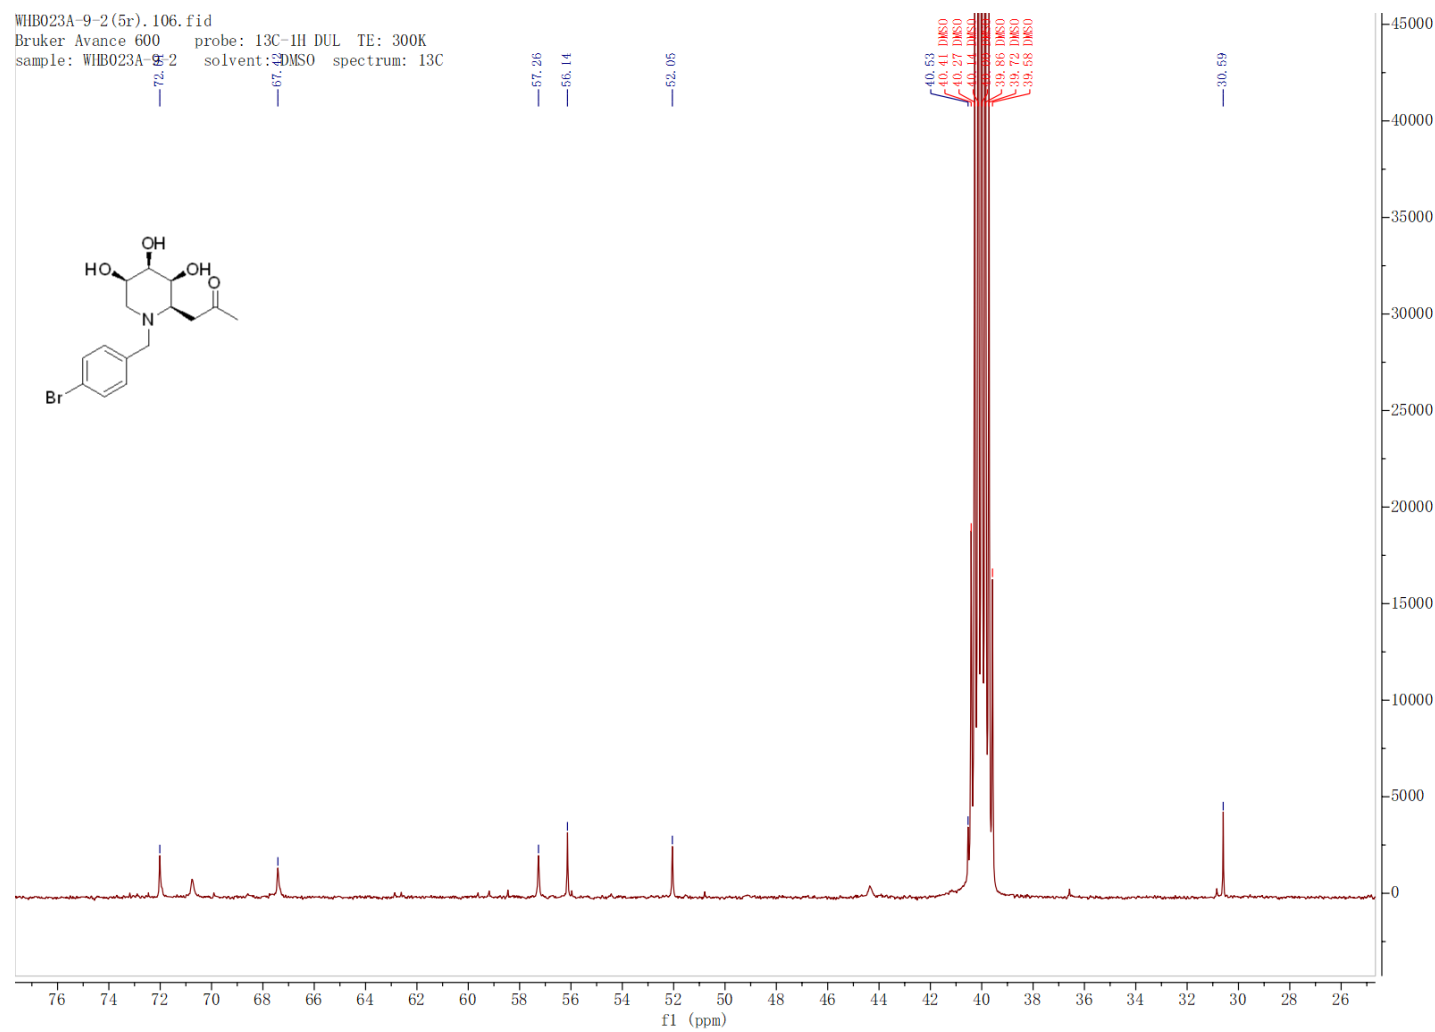

**Figure S85.** Partial region amplification of the  $^{13}\text{C}$  NMR of compound **5u**.



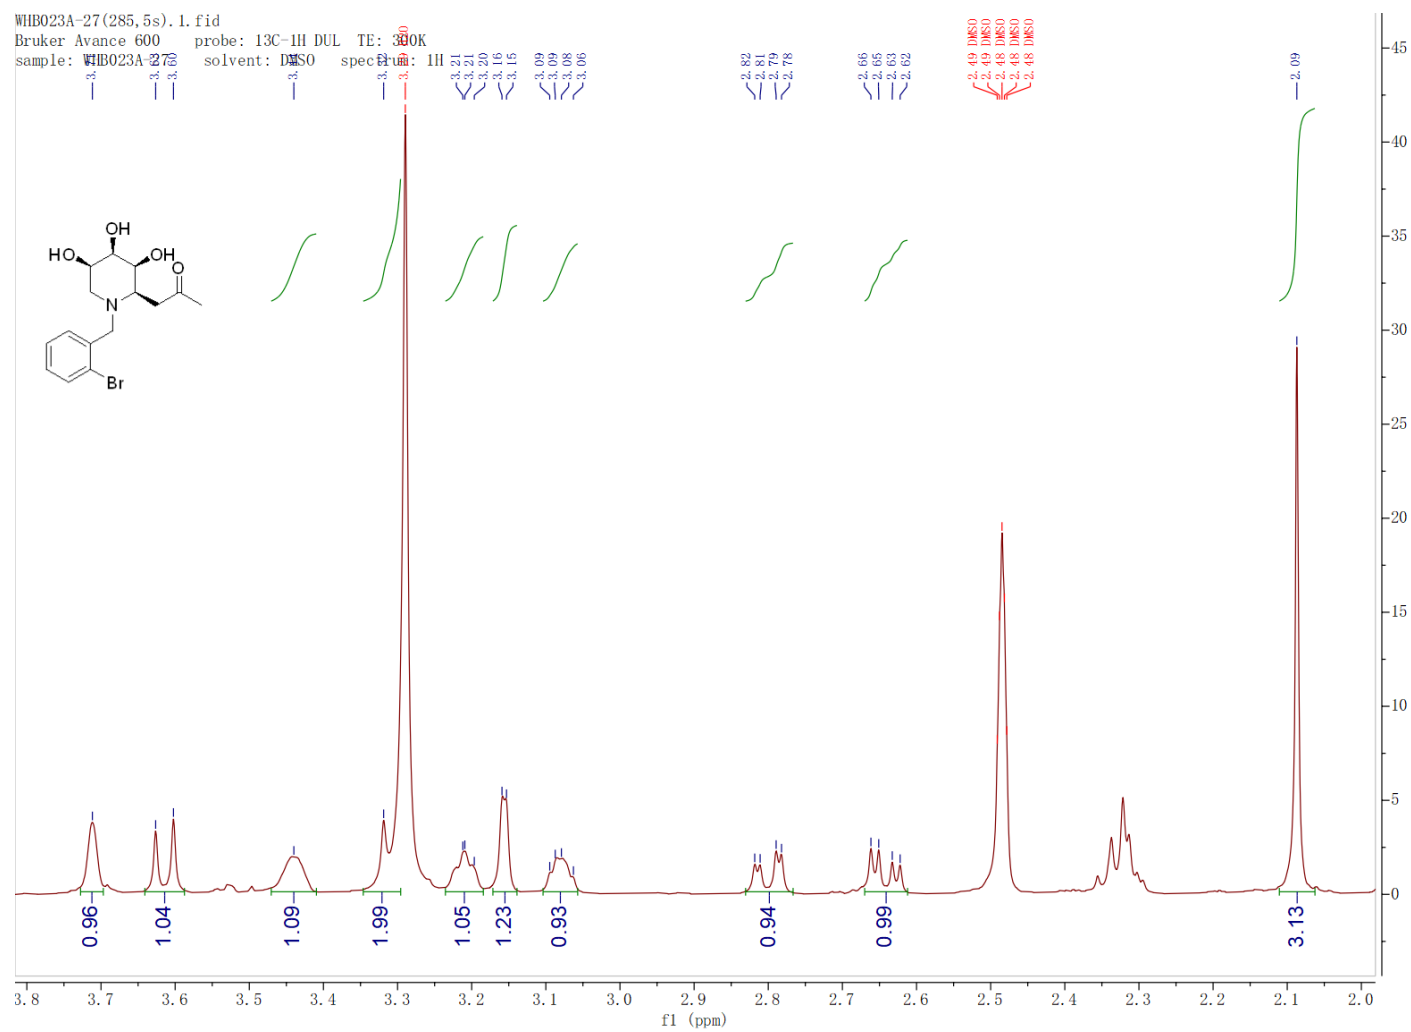

Figure S87. Partial region amplification of the  $^1\text{H}$  NMR of compound **5v**.

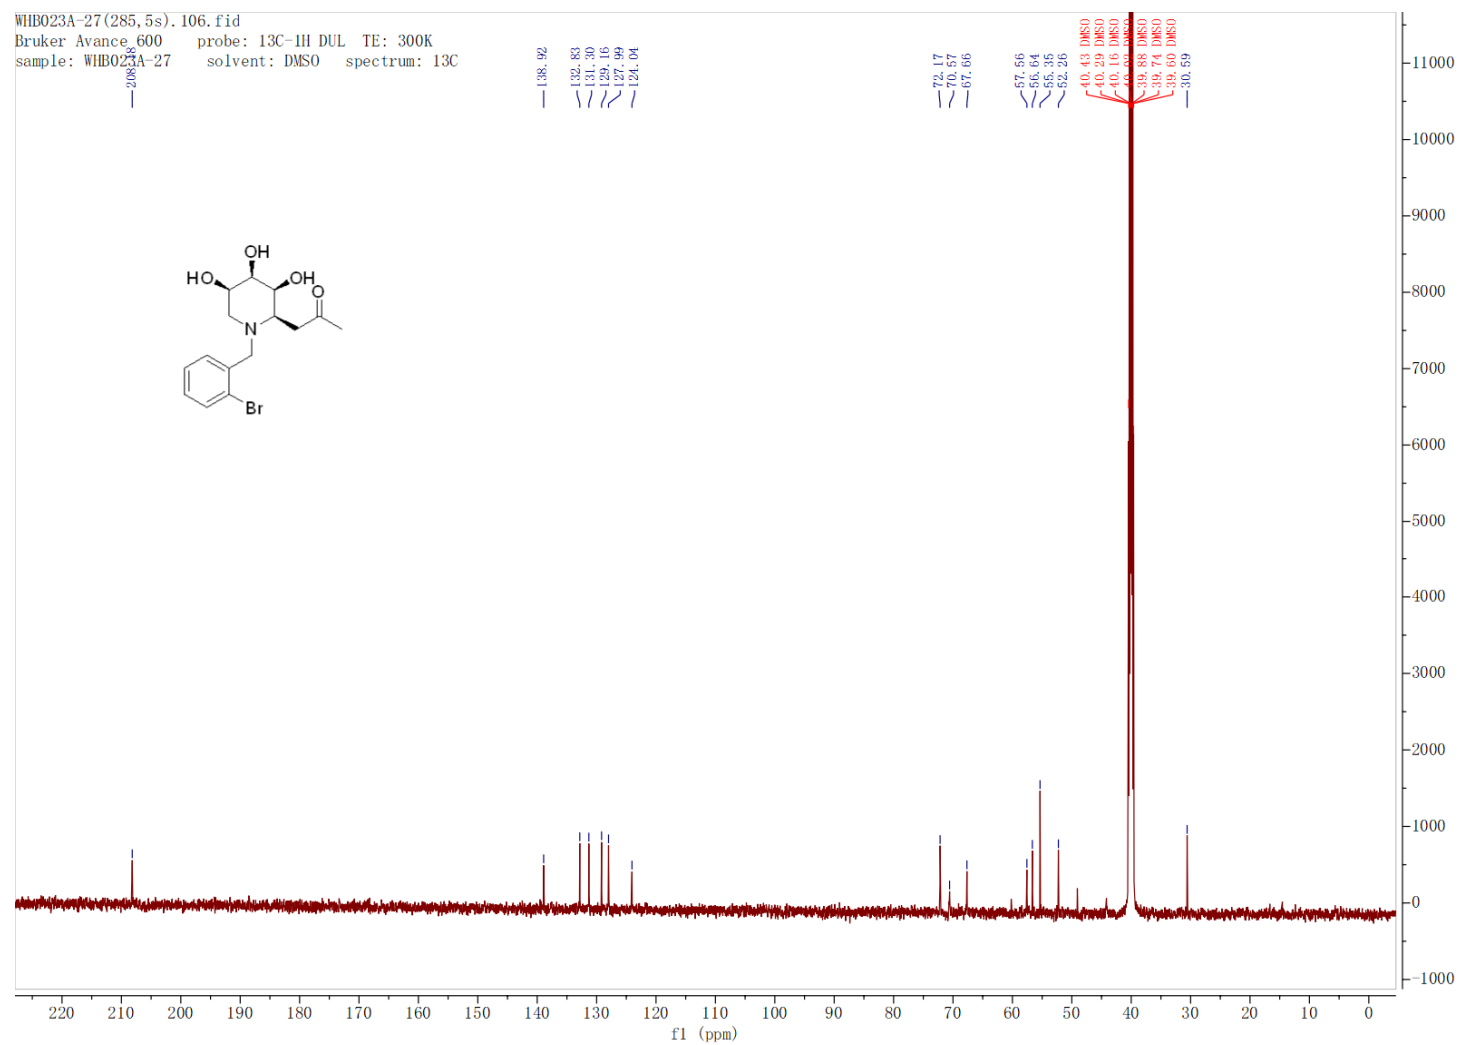

Figure S88. The  $^{13}\text{C}$  NMR of compound 5v.

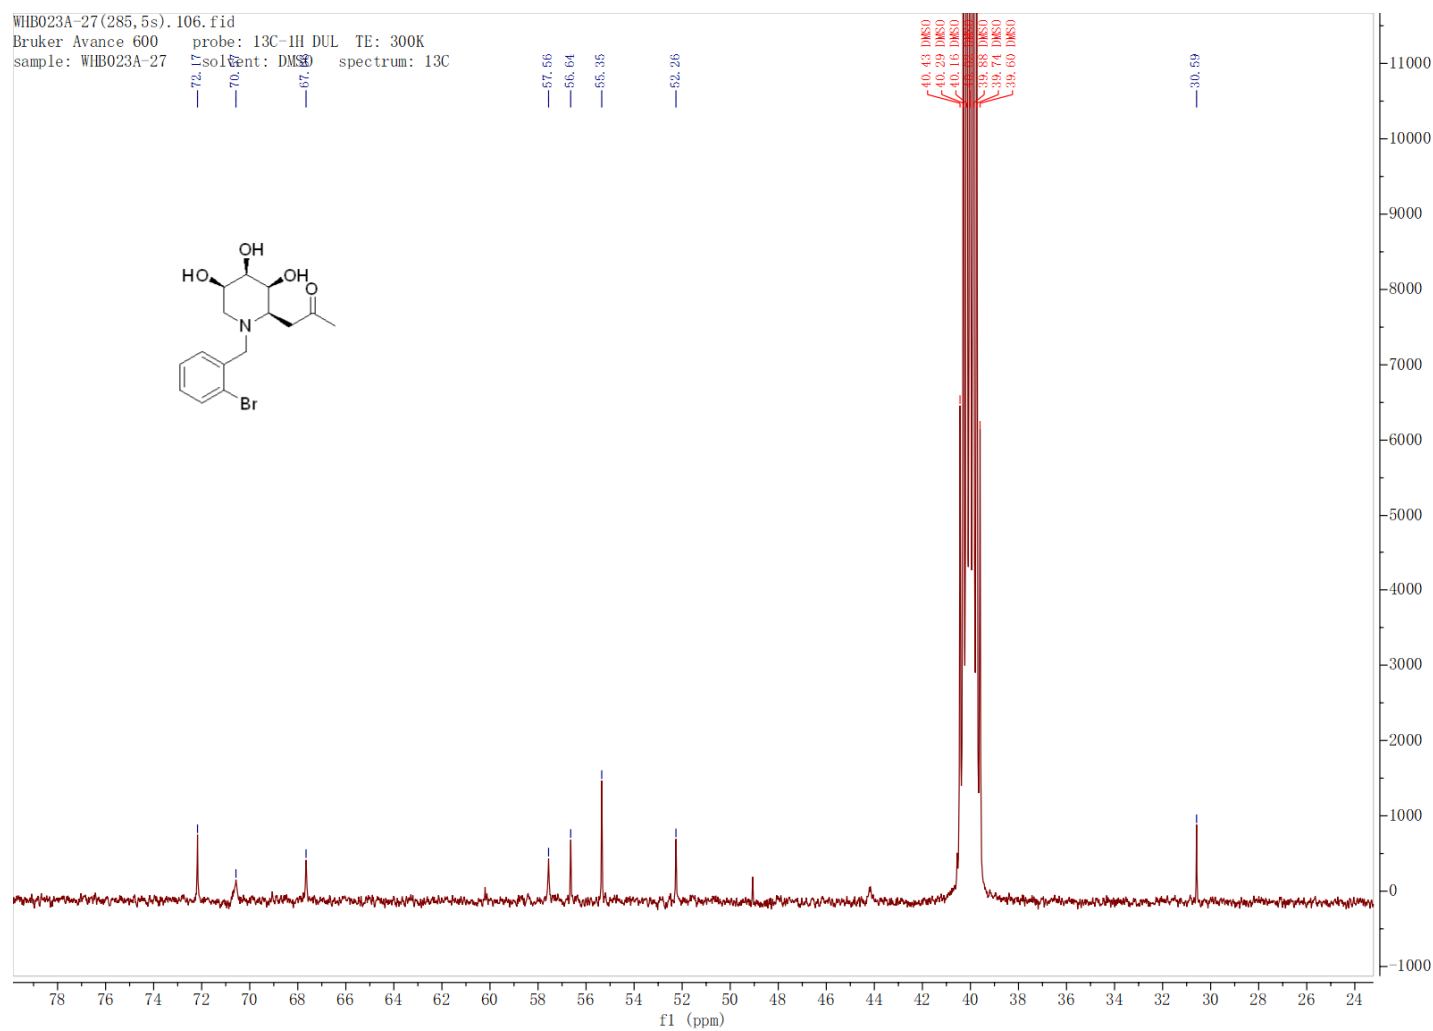

Figure S89. Partial region amplification of the  $^{13}\text{C}$  NMR of compound **5v**.

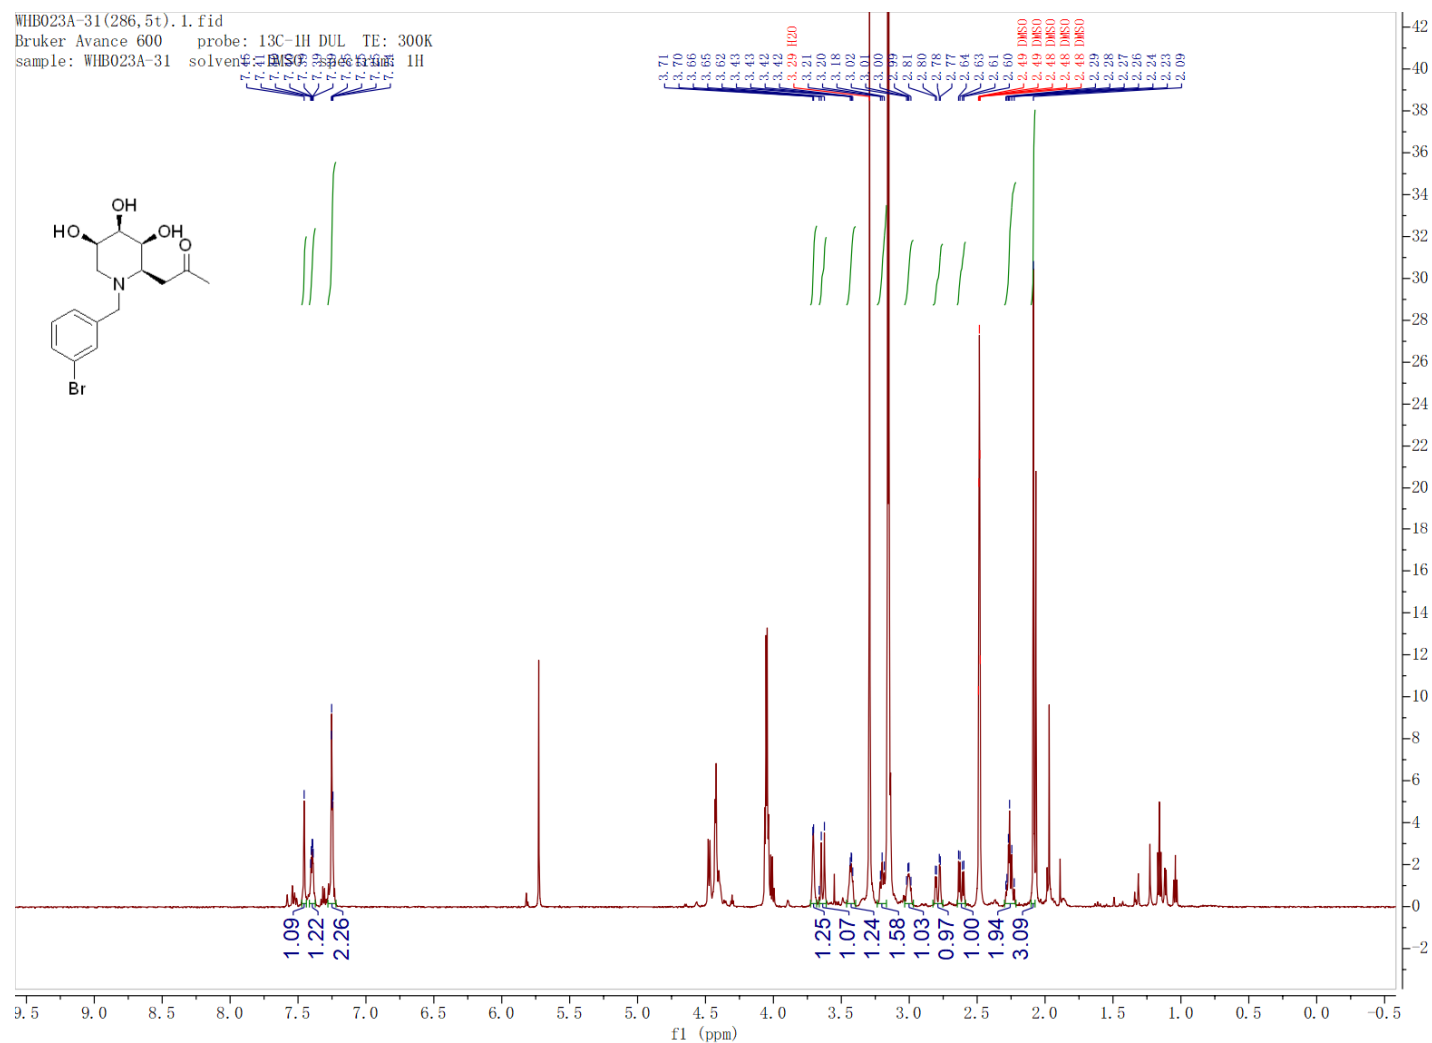

Figure S90. The  $^1\text{H}$  NMR of compound 5w.

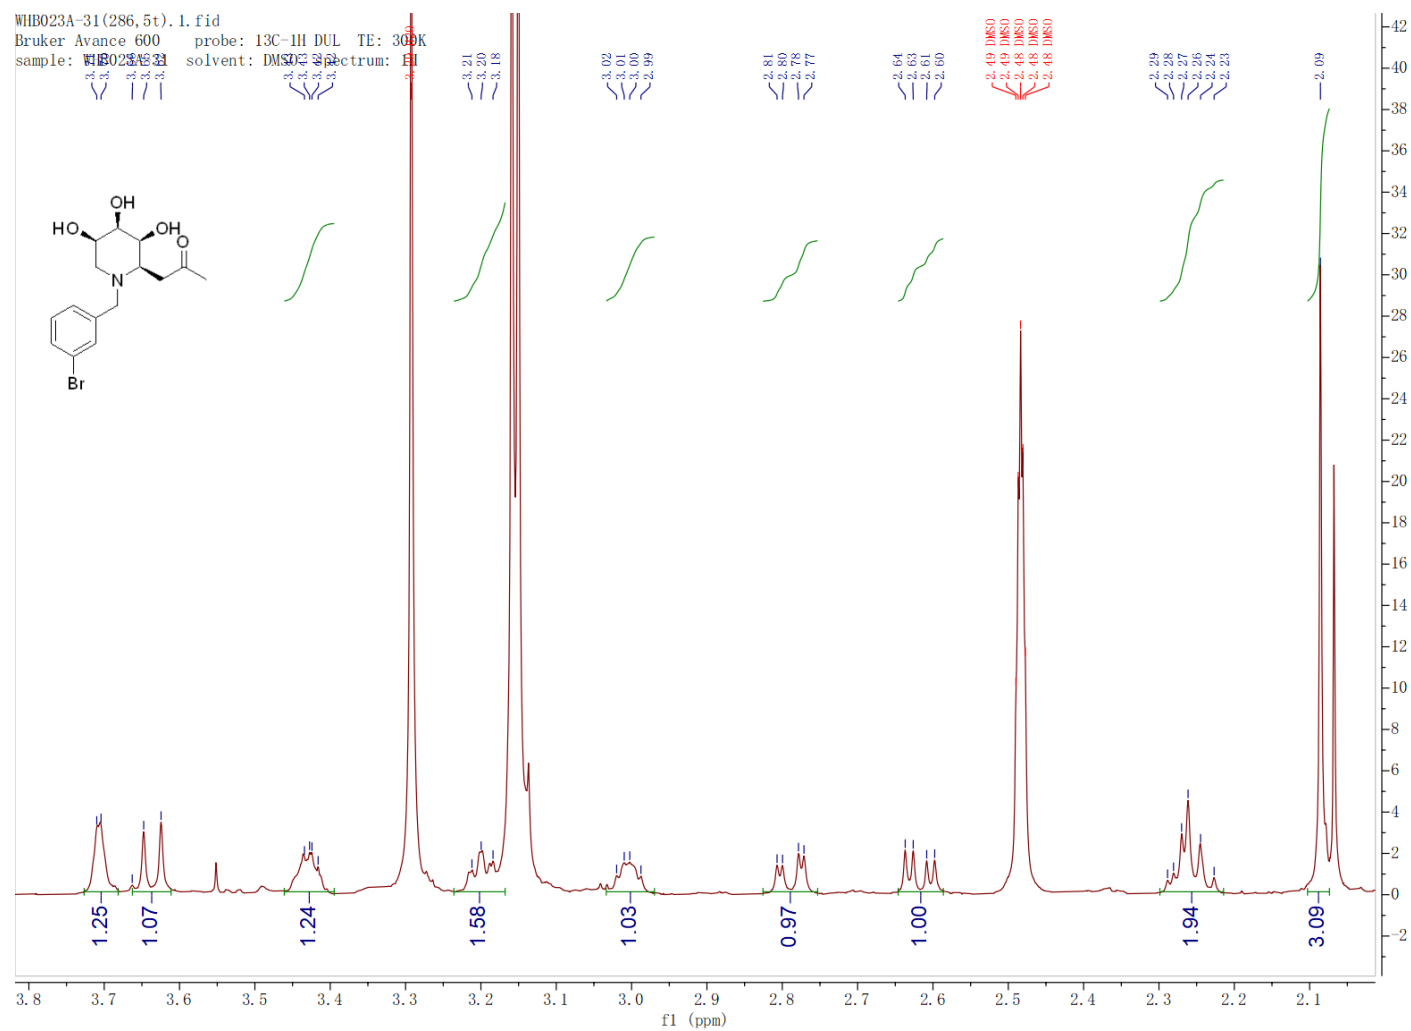

Figure S91. Partial region amplification of the  $^1\text{H}$  NMR of compound 5w.



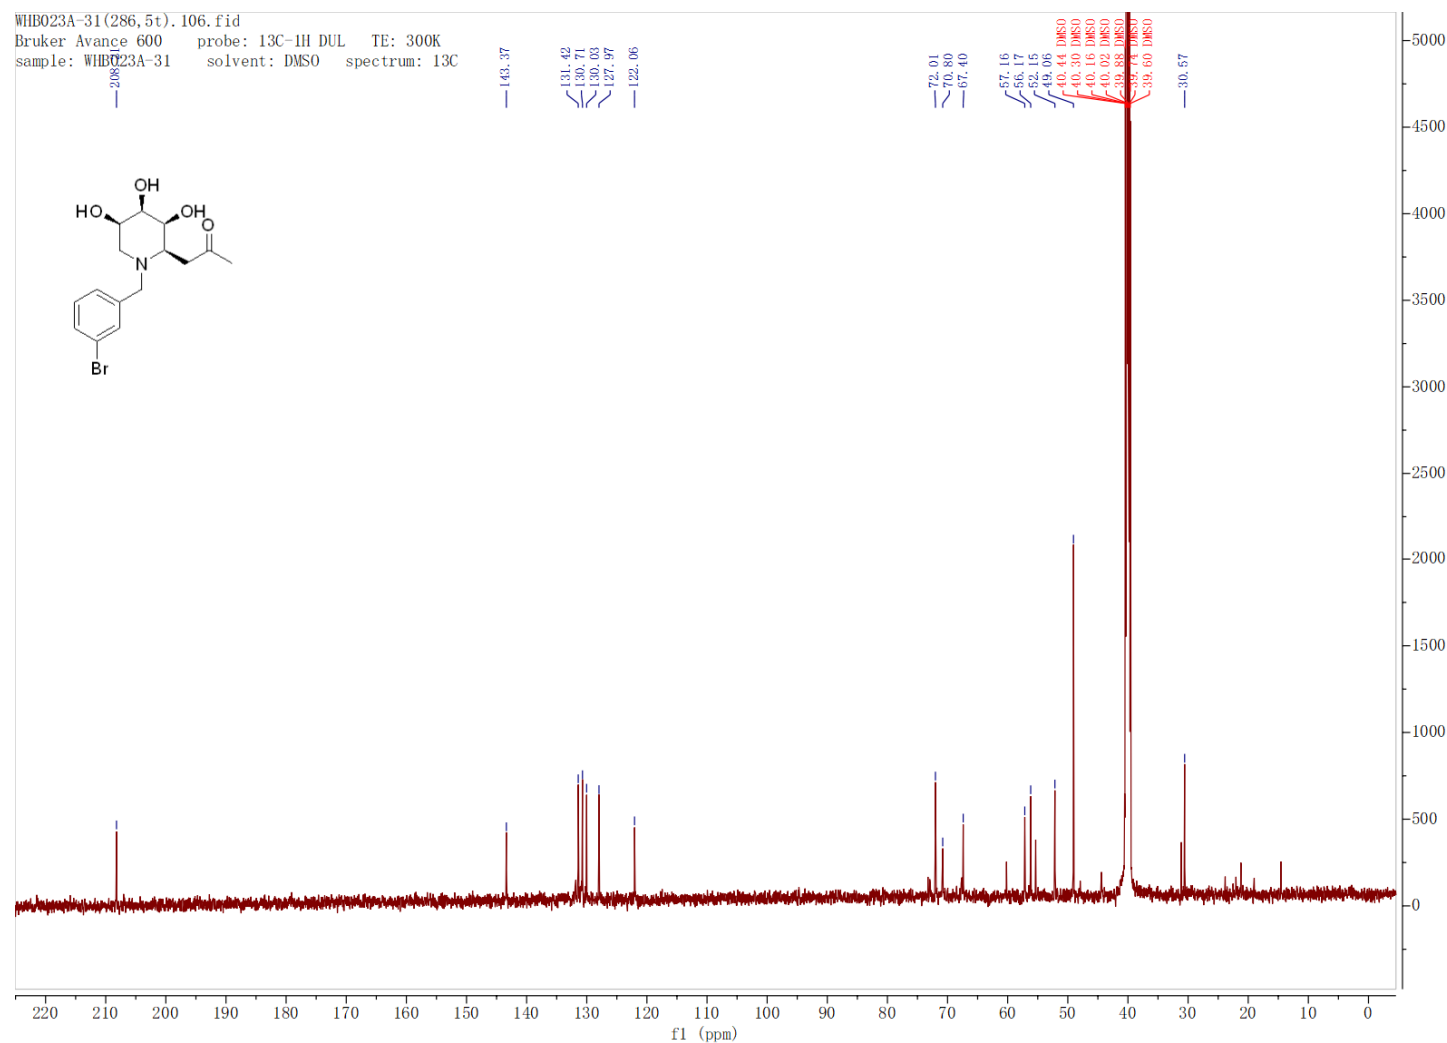

Figure S92. The  $^{13}\text{C}$  NMR of compound 5w.

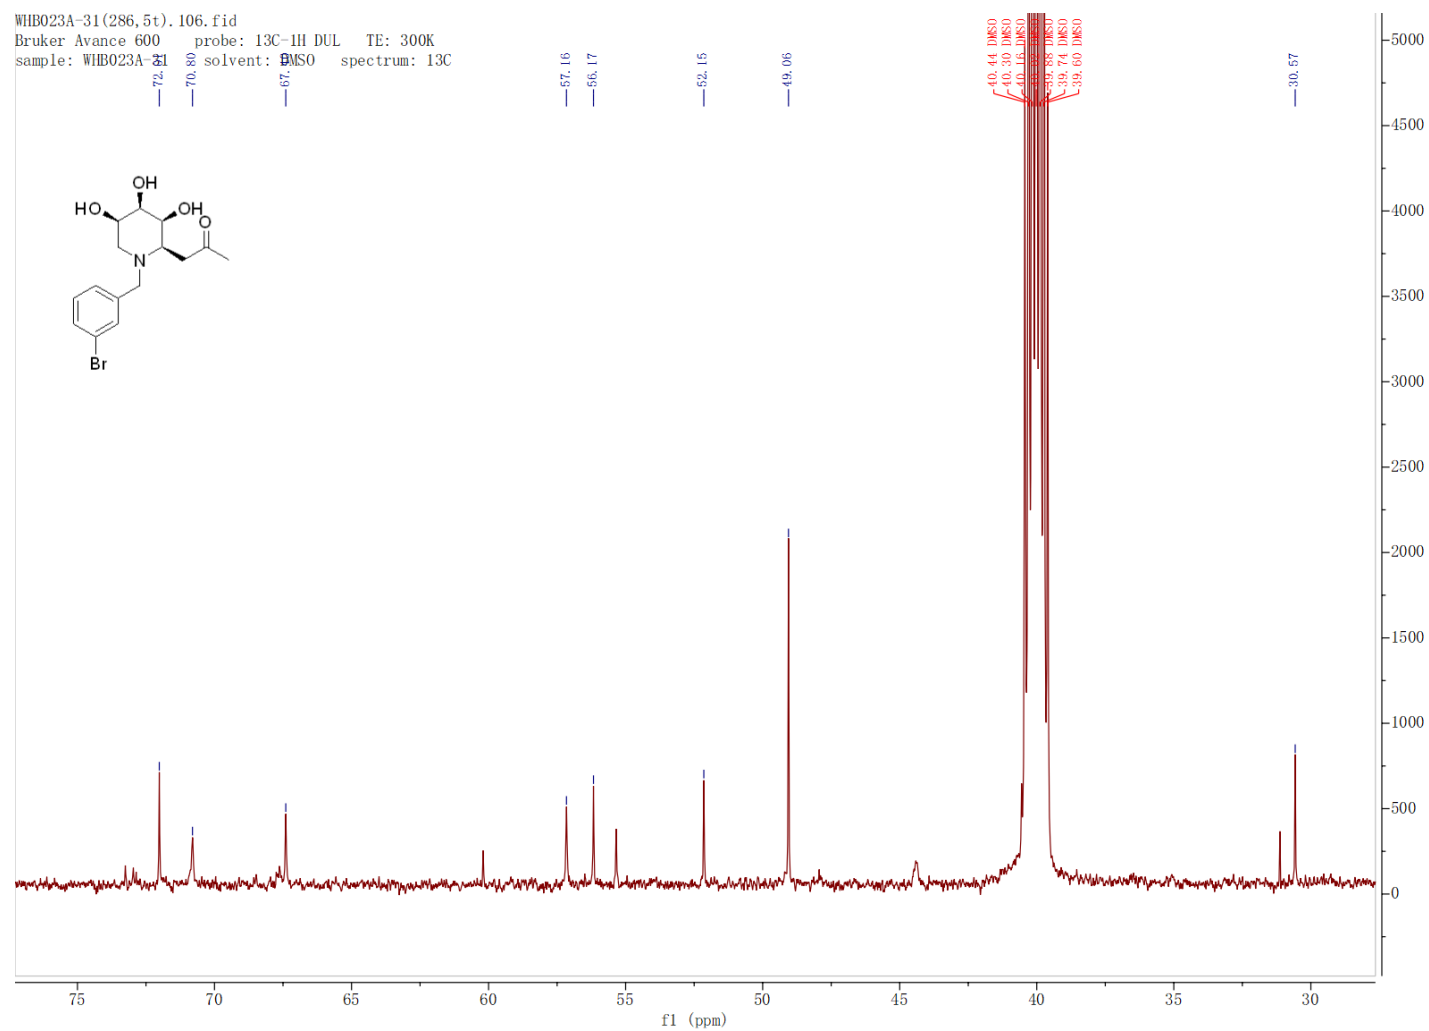

Figure S93. Partial region amplification of the  $^{13}\text{C}$  NMR of compound 5w.

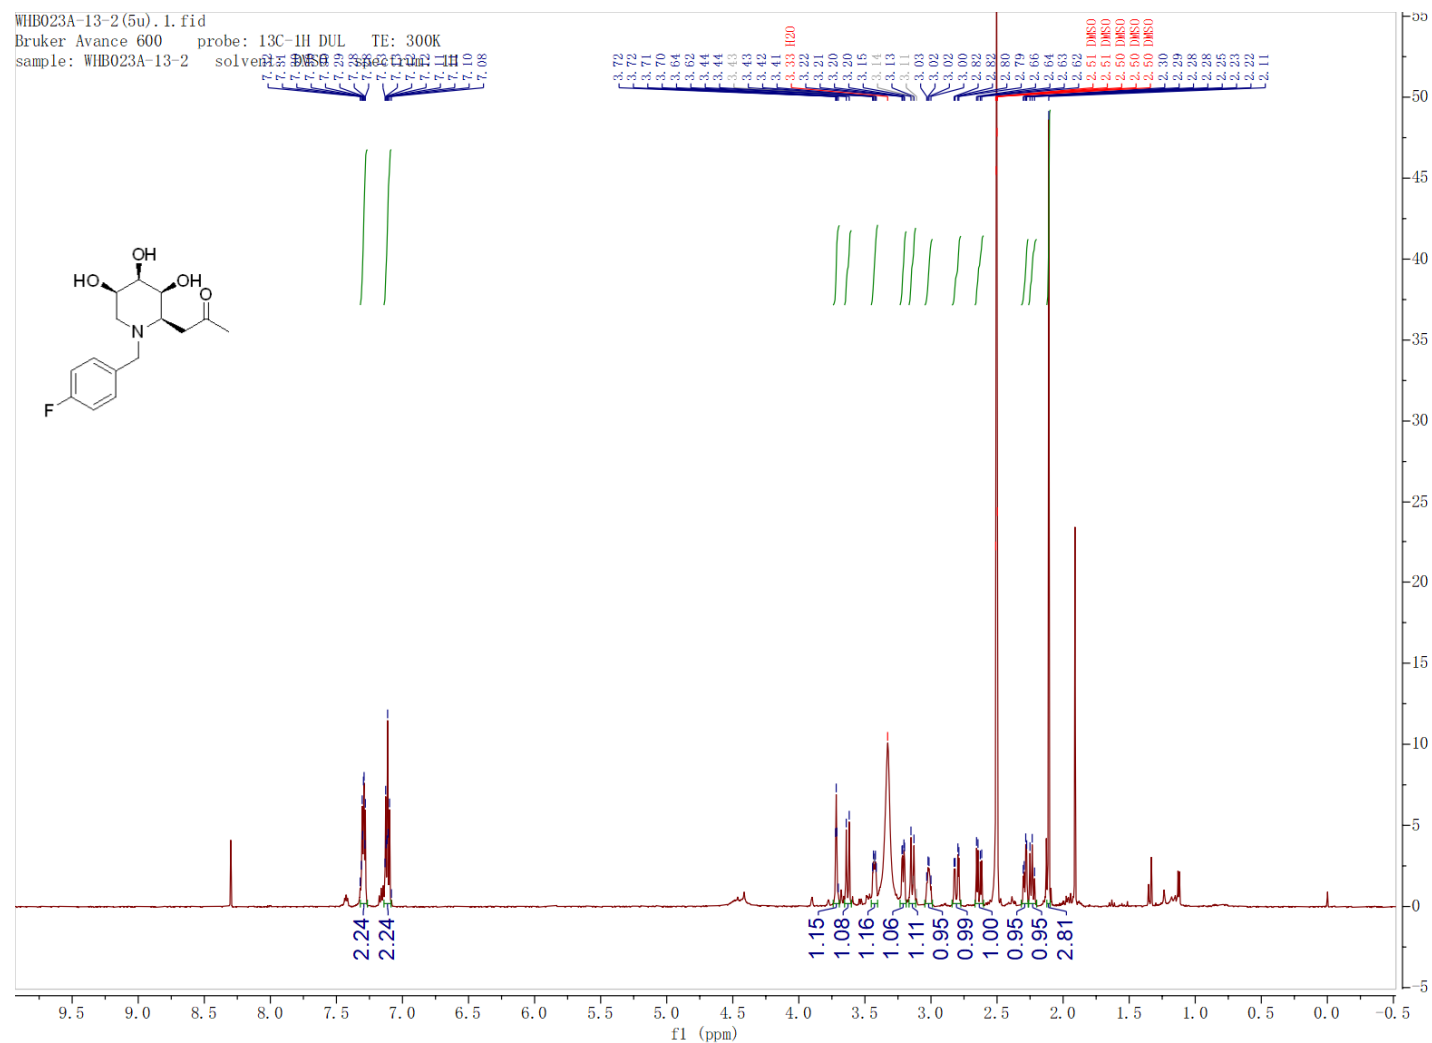

Figure S94. The  $^1\text{H}$  NMR of compound 5x.

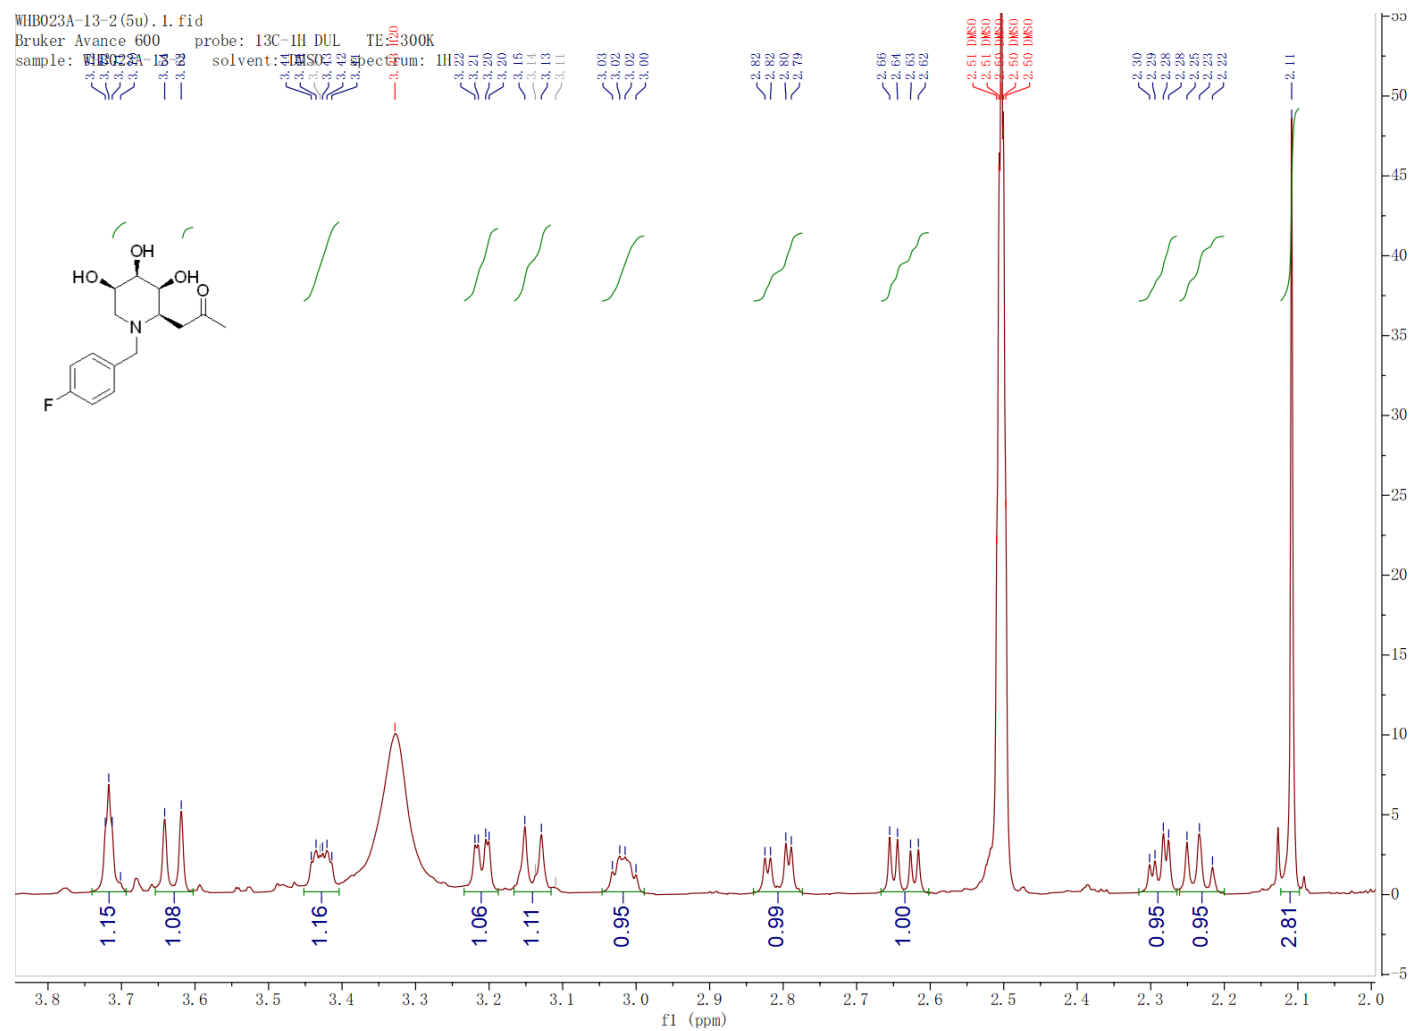

Figure S95. Partial region amplification of the <sup>1</sup>H NMR of compound 5x.

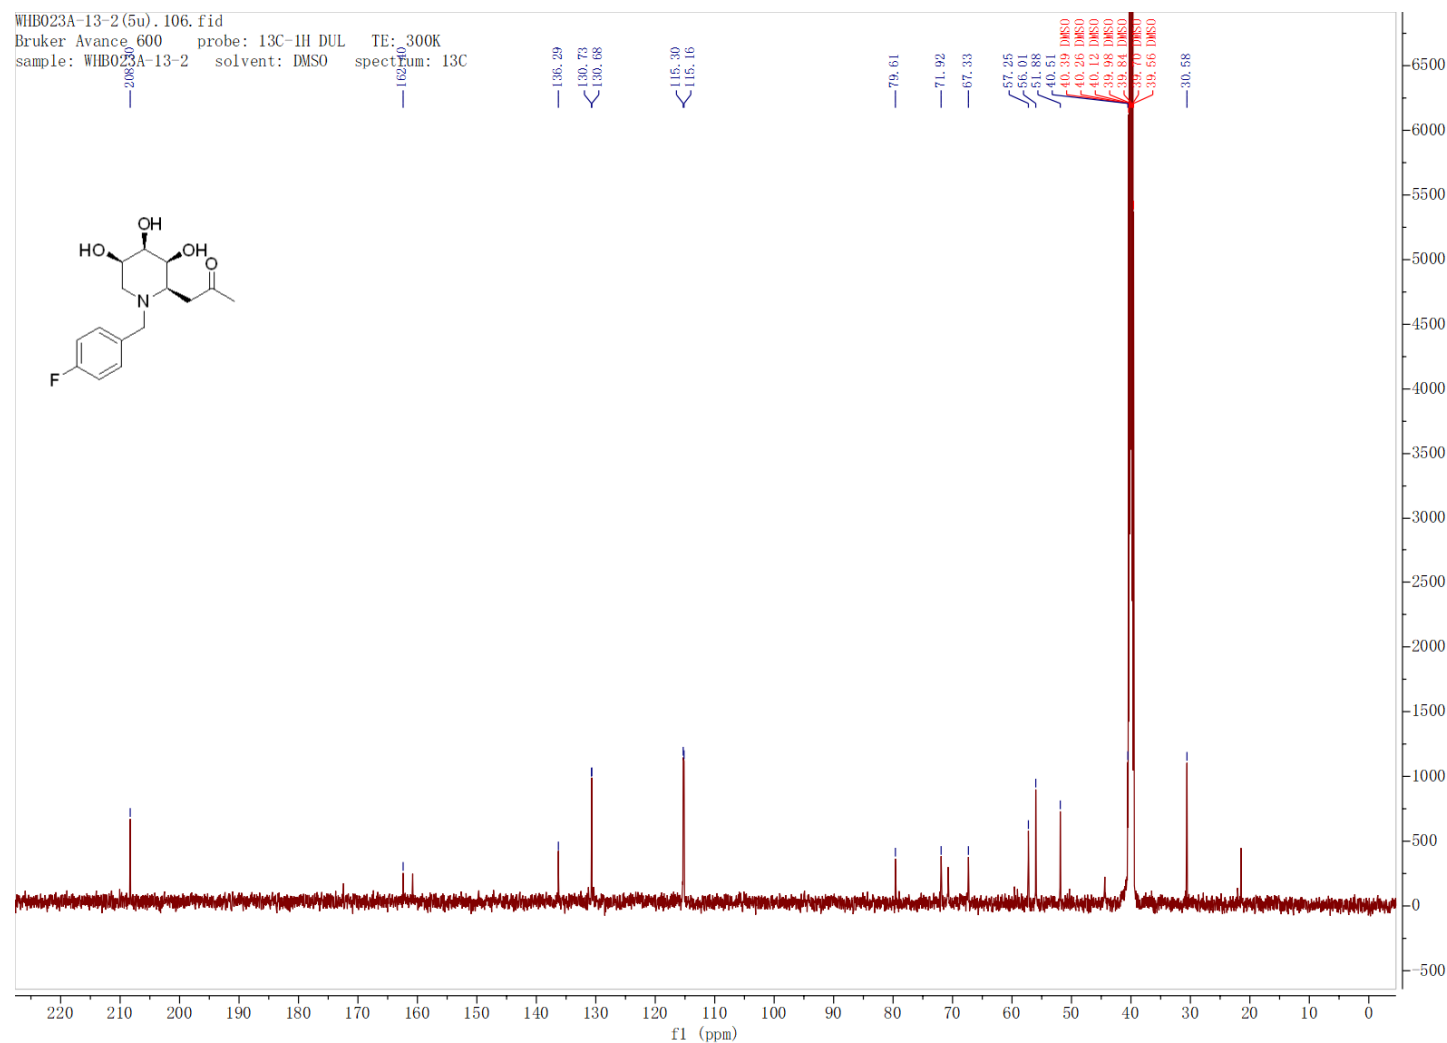

Figure S96. The  $^{13}\text{C}$  NMR of compound 5x.

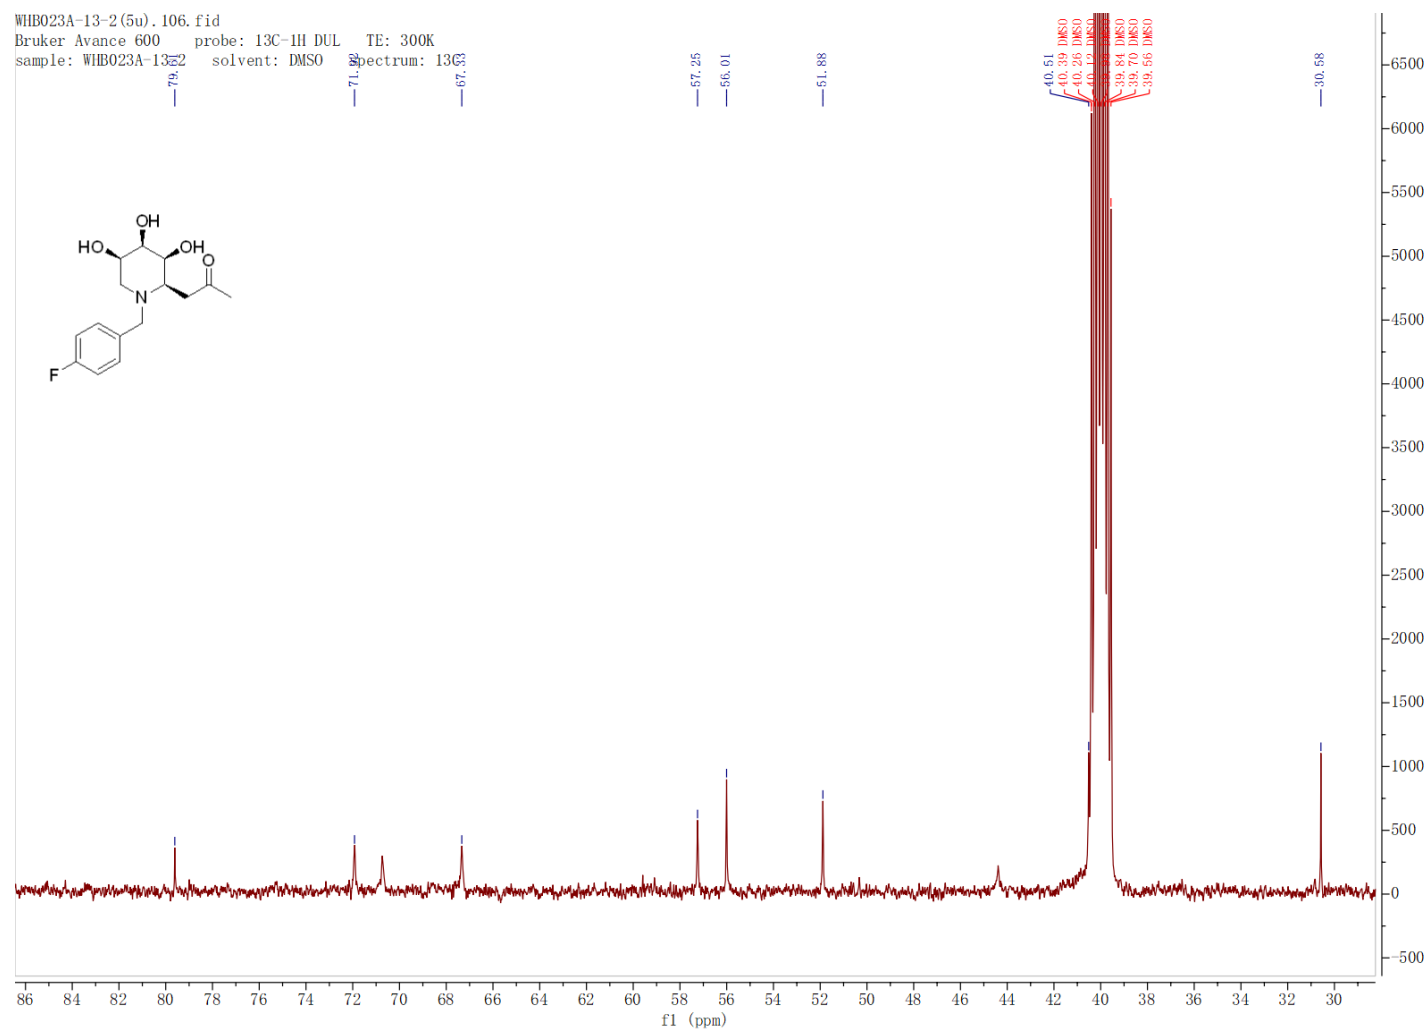

Figure S97. Partial region amplification of the  $^{13}\text{C}$  NMR of compound 5x.

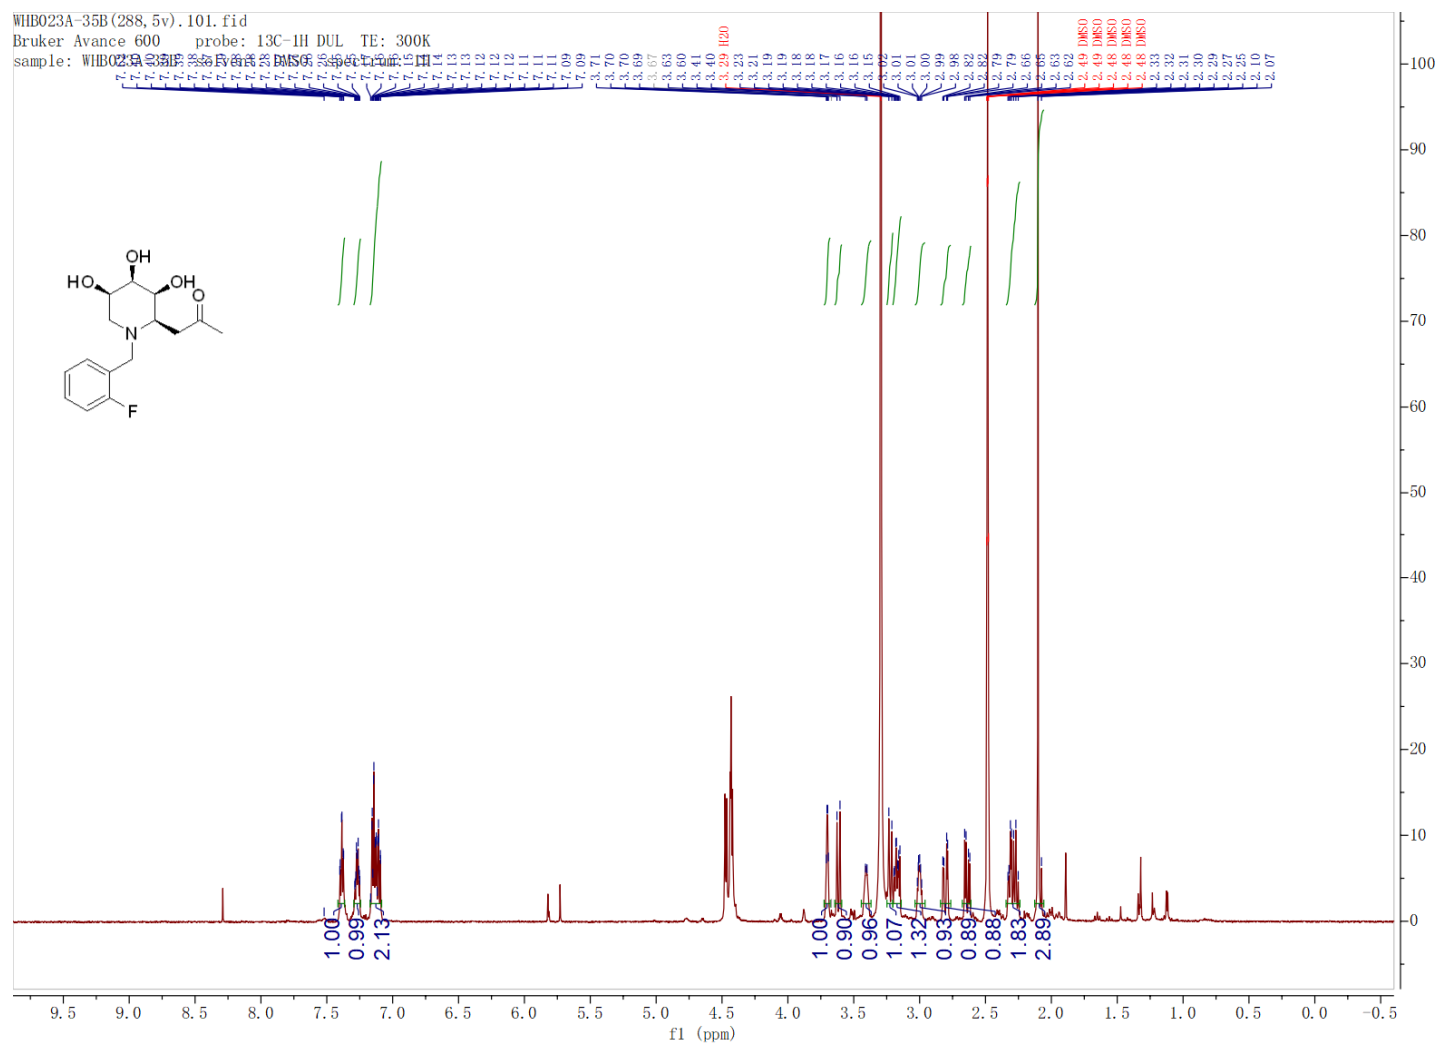

Figure S98. The  $^1\text{H}$  NMR of compound 5y.

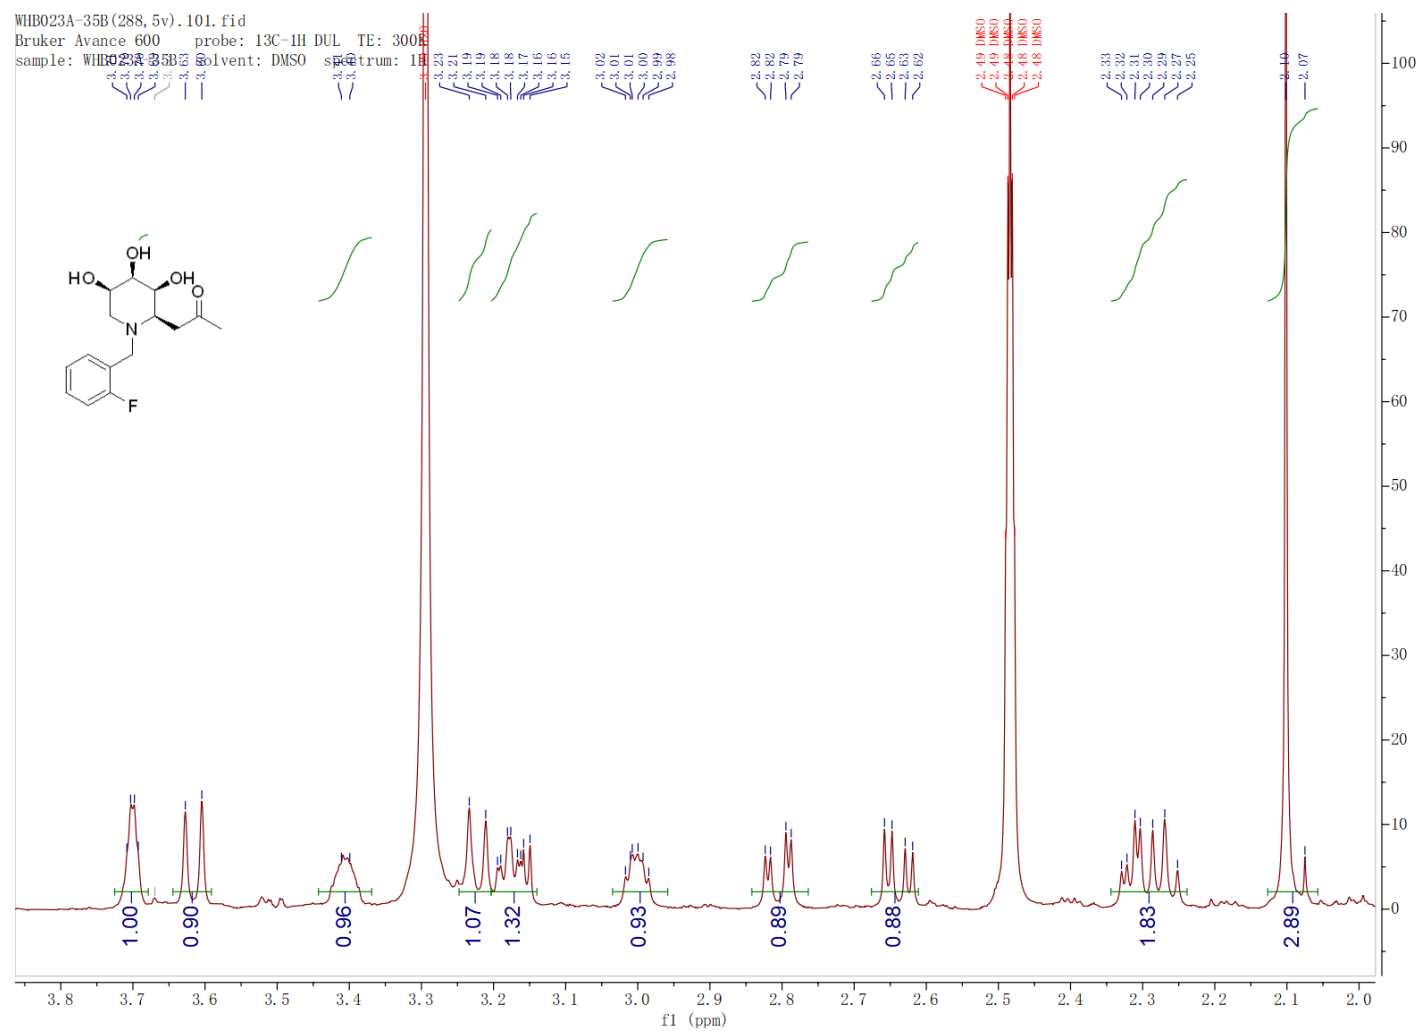

Figure S99. Partial region amplification of the  $^1\text{H}$  NMR of compound **5y**.



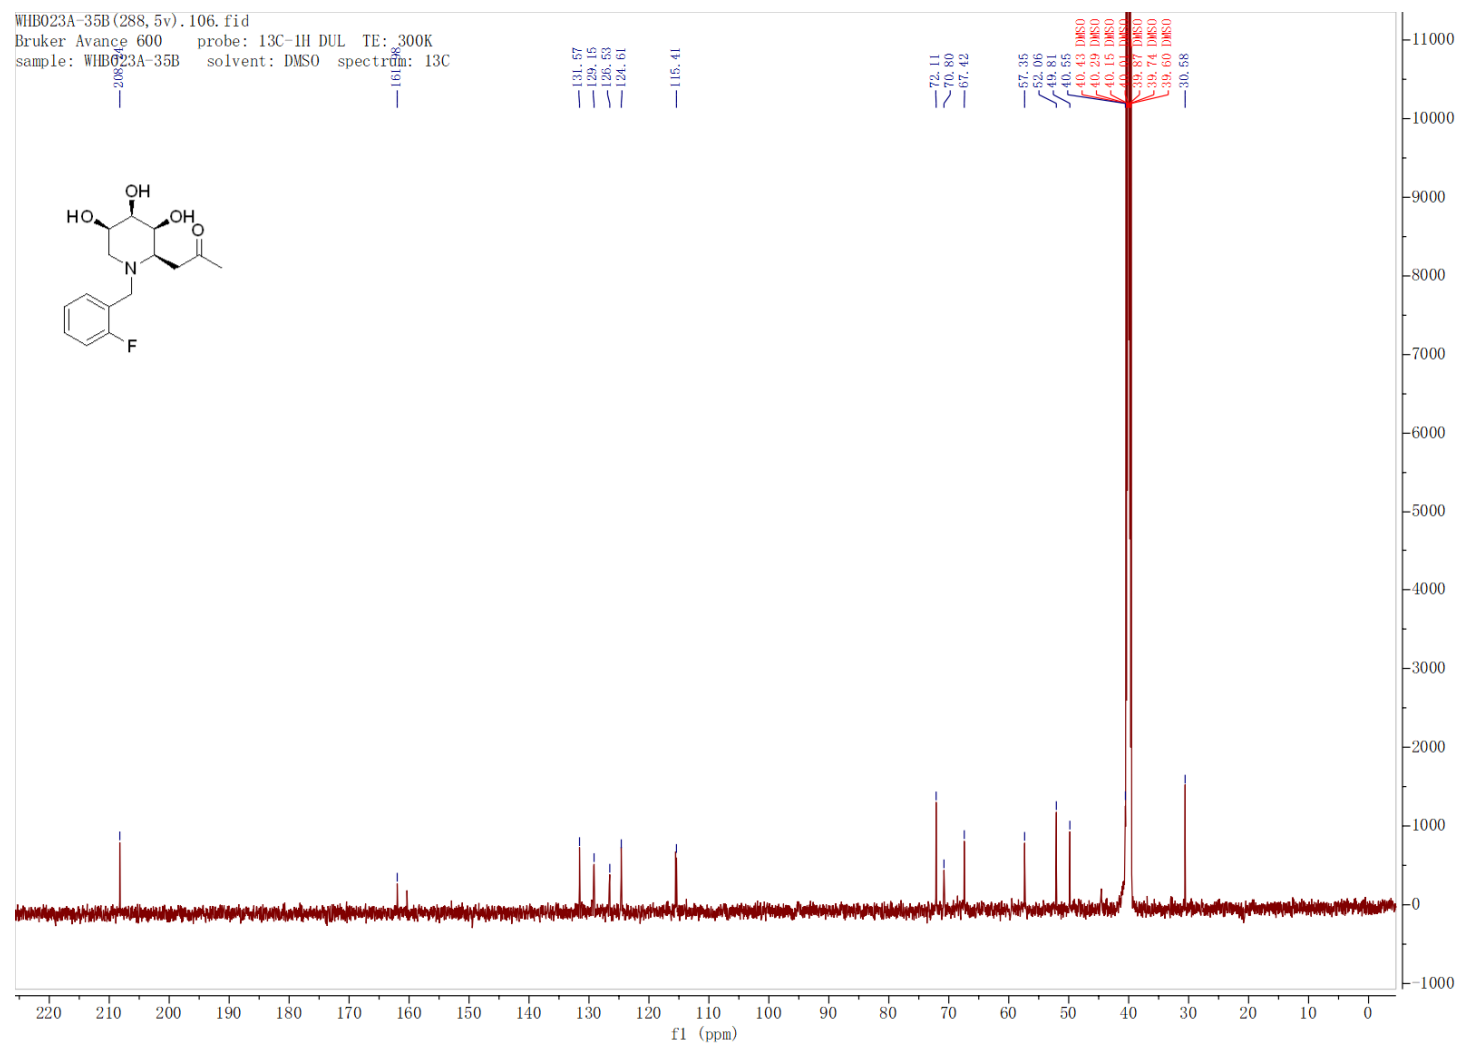

Figure S100. The  $^{13}\text{C}$  NMR of compound **5y**.

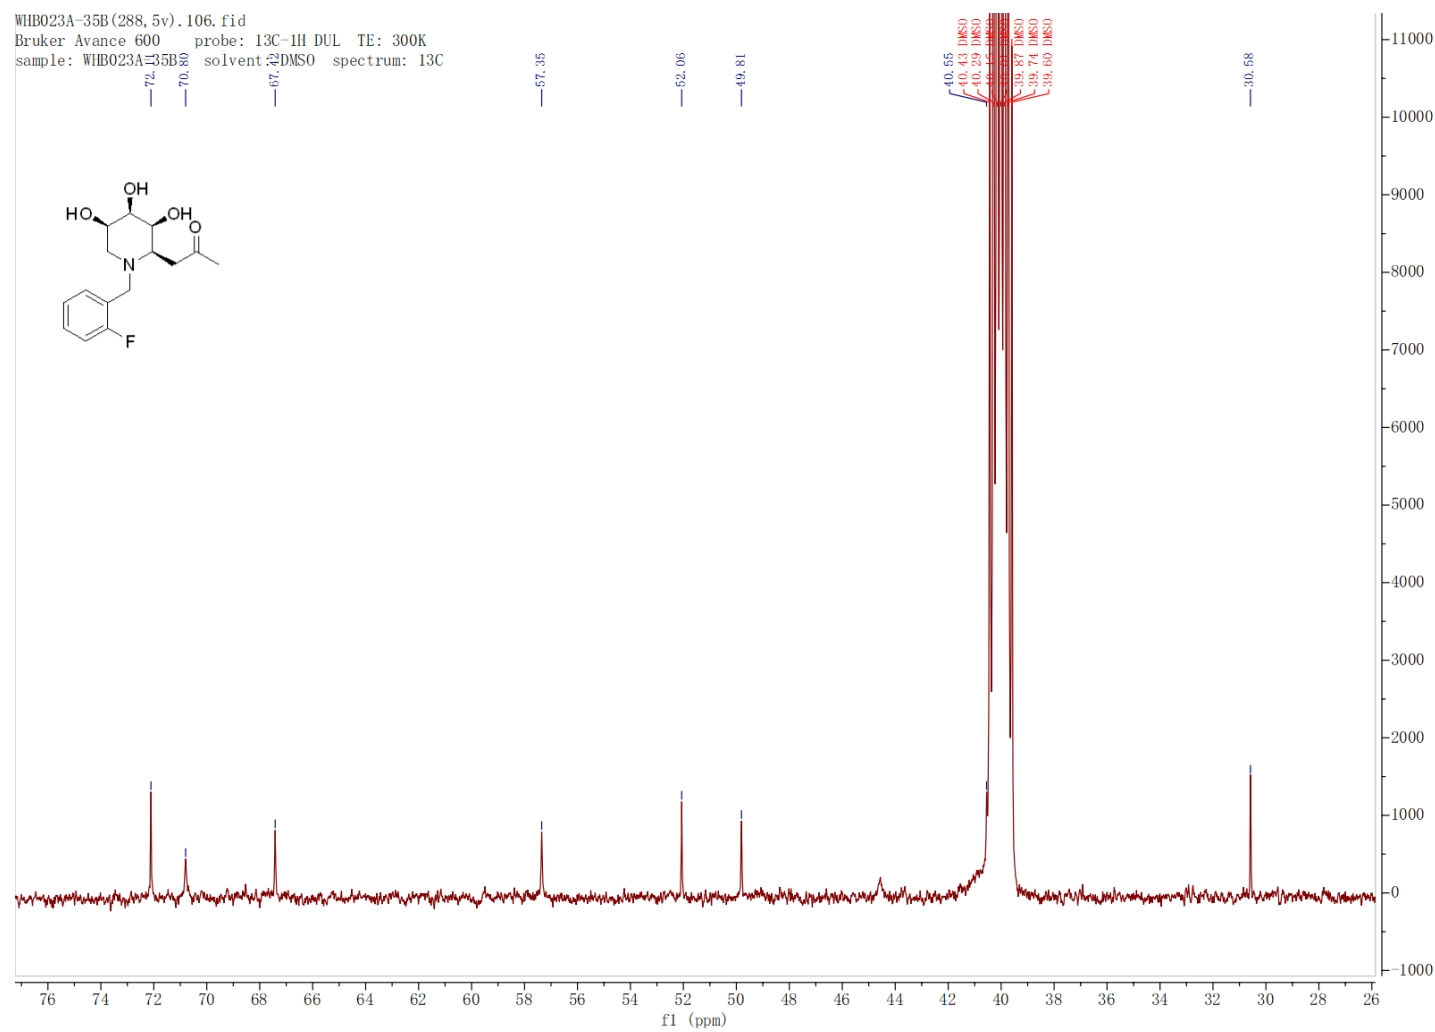

**Figure S101.** Partial region amplification of the  $^{13}\text{C}$  NMR of compound 5y.

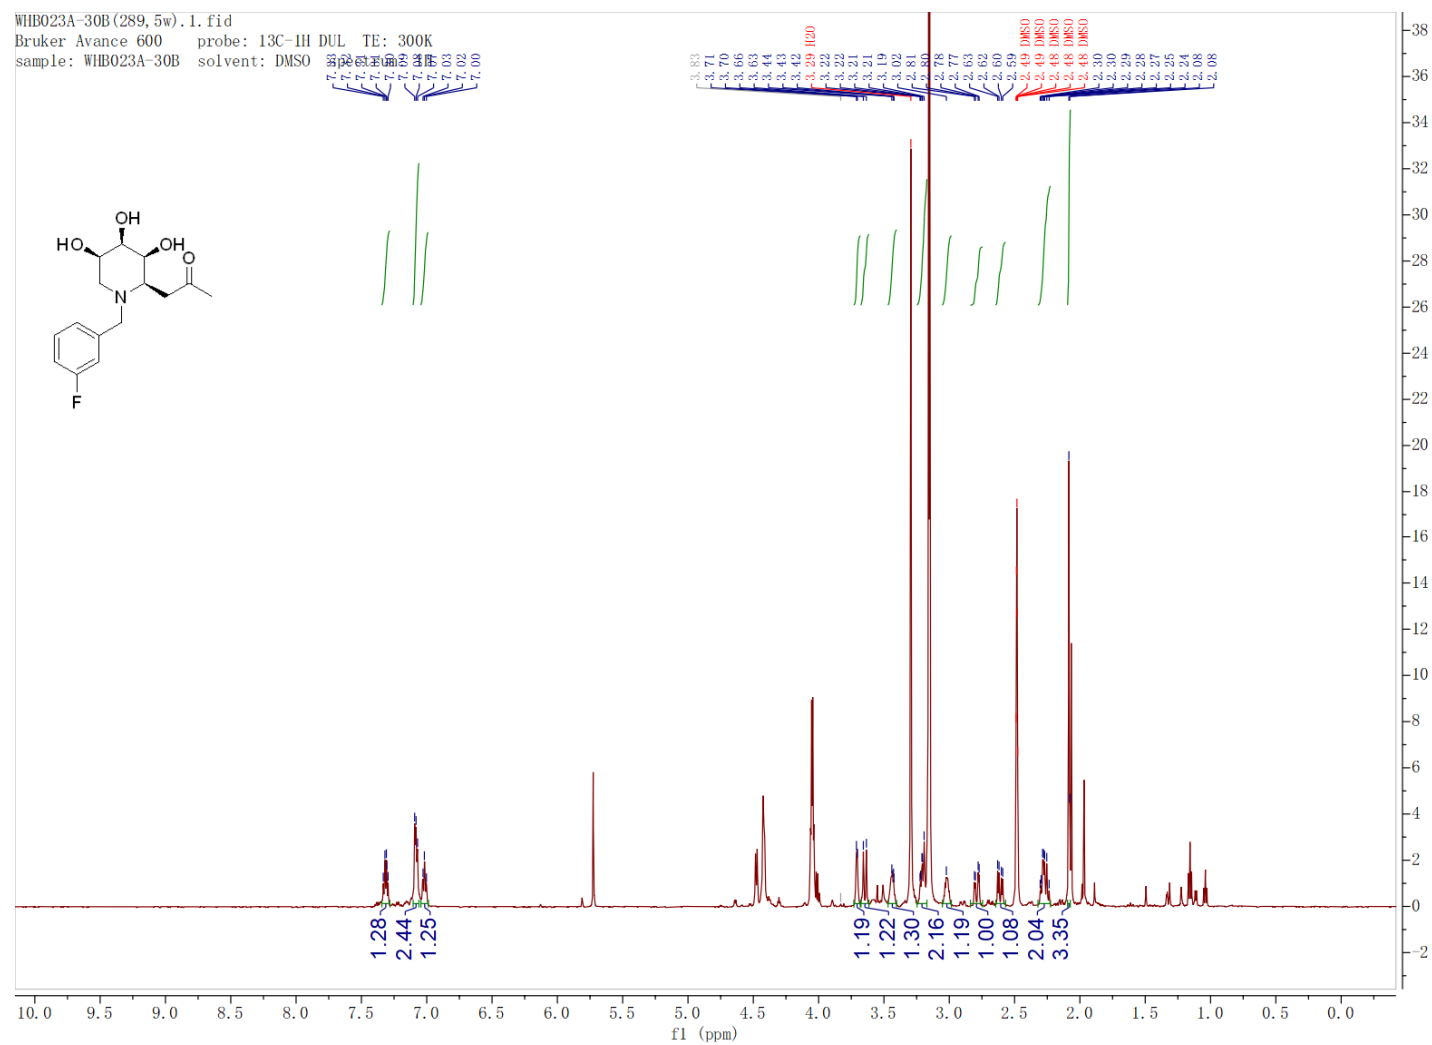

Figure S102. The  $^1\text{H}$  NMR of compound 5z.

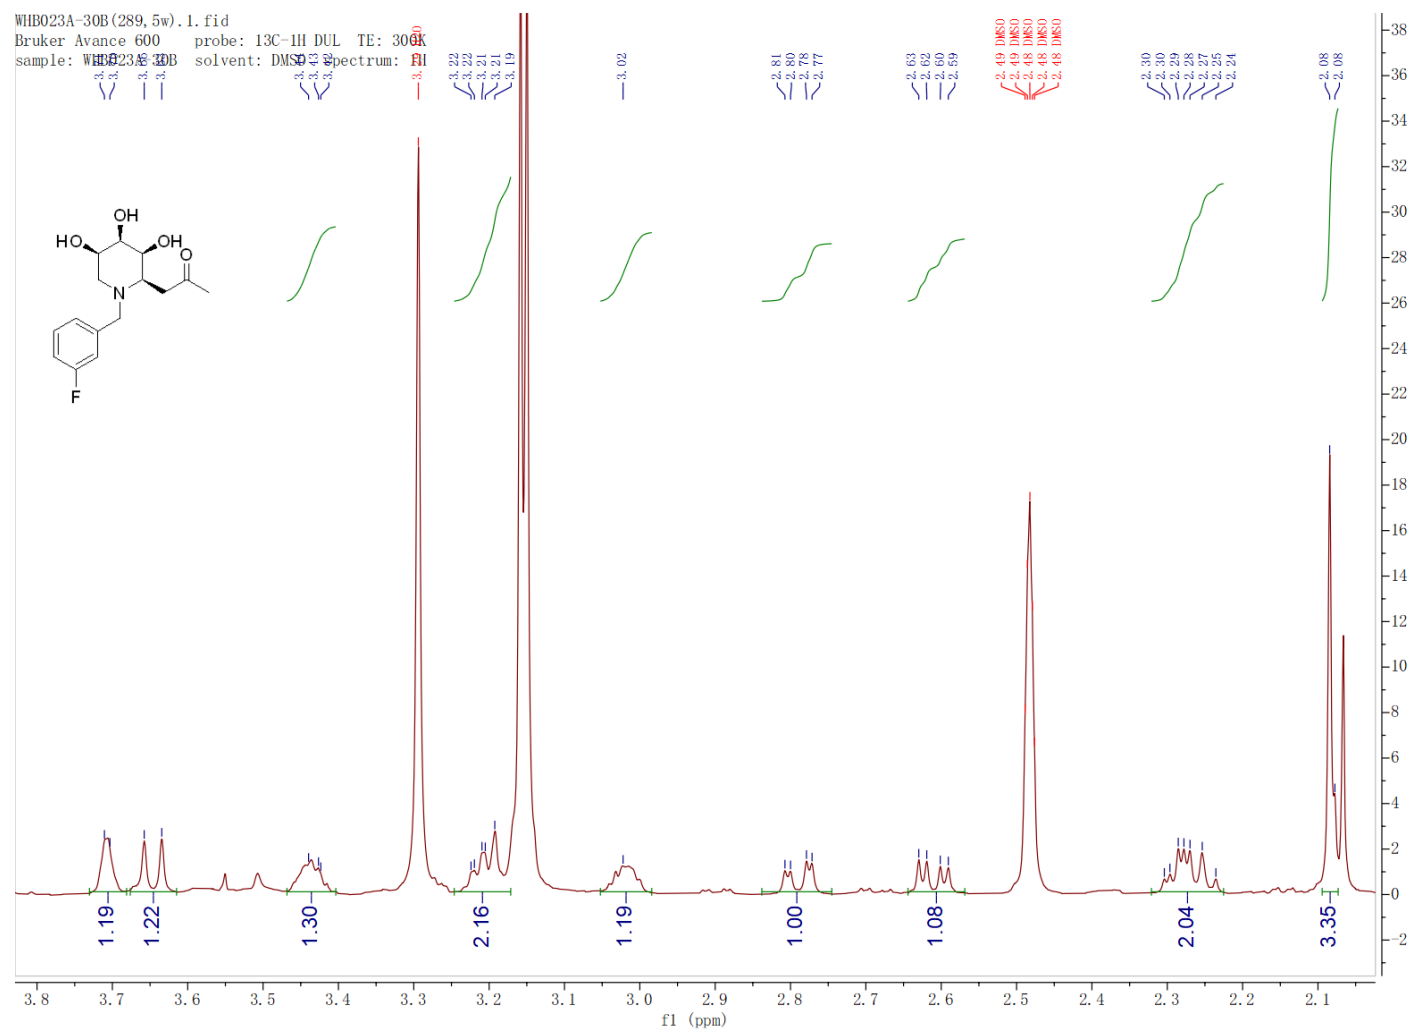

**Figure S103.** Partial region amplification of the  $^1\text{H}$  NMR of compound 5z.

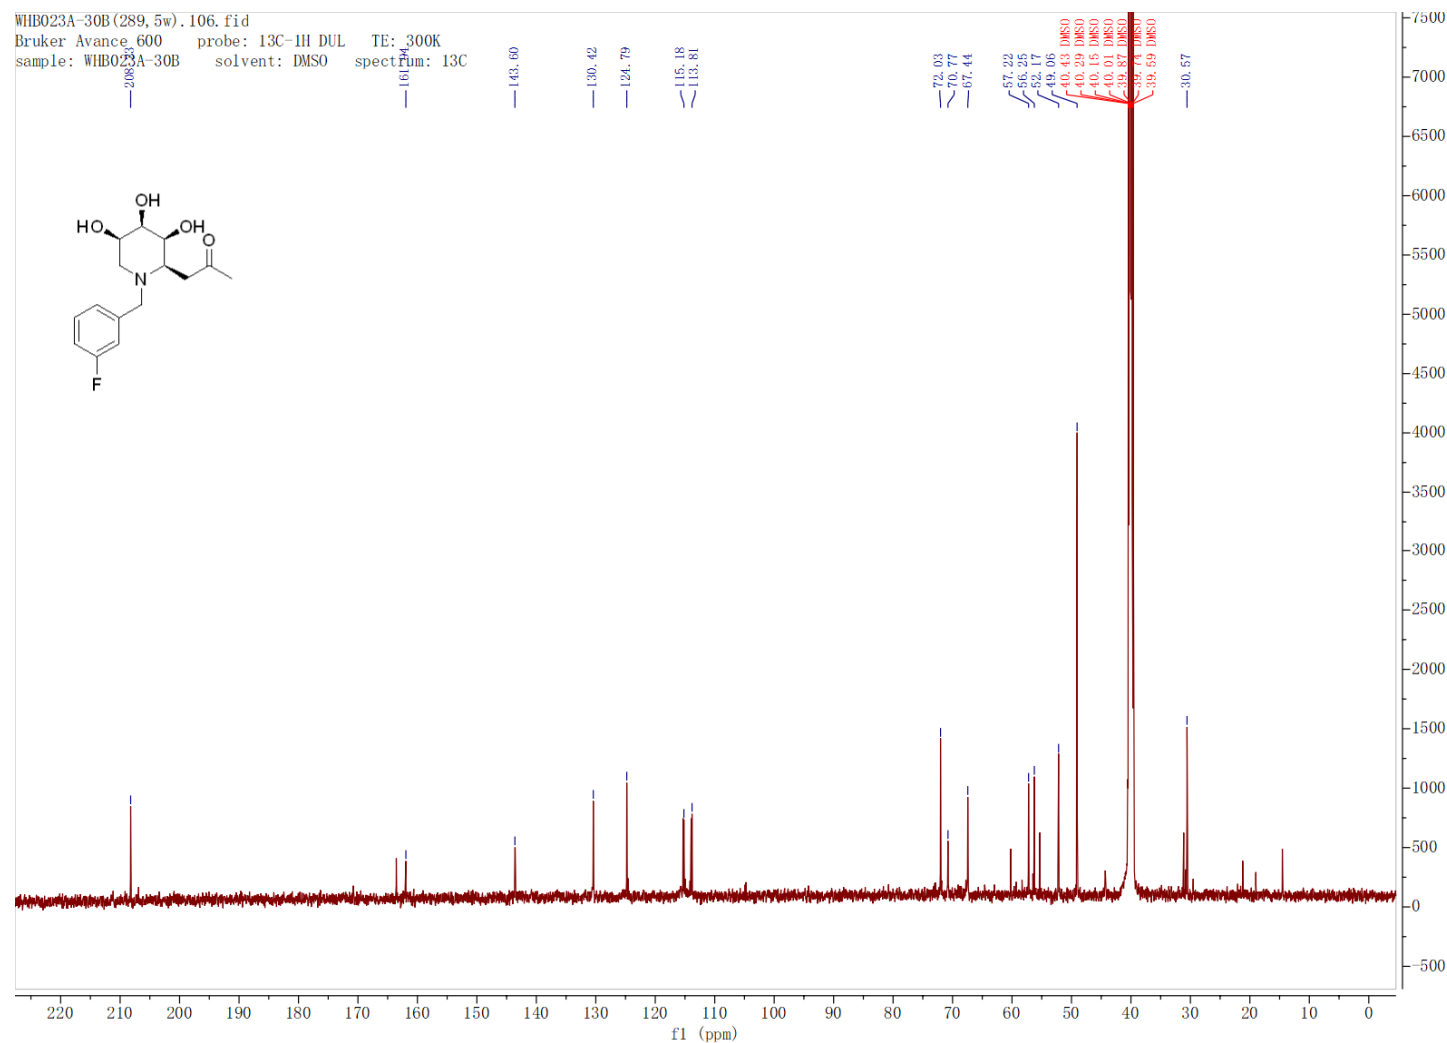

Figure S104. The  $^{13}\text{C}$  NMR of compound 5z.

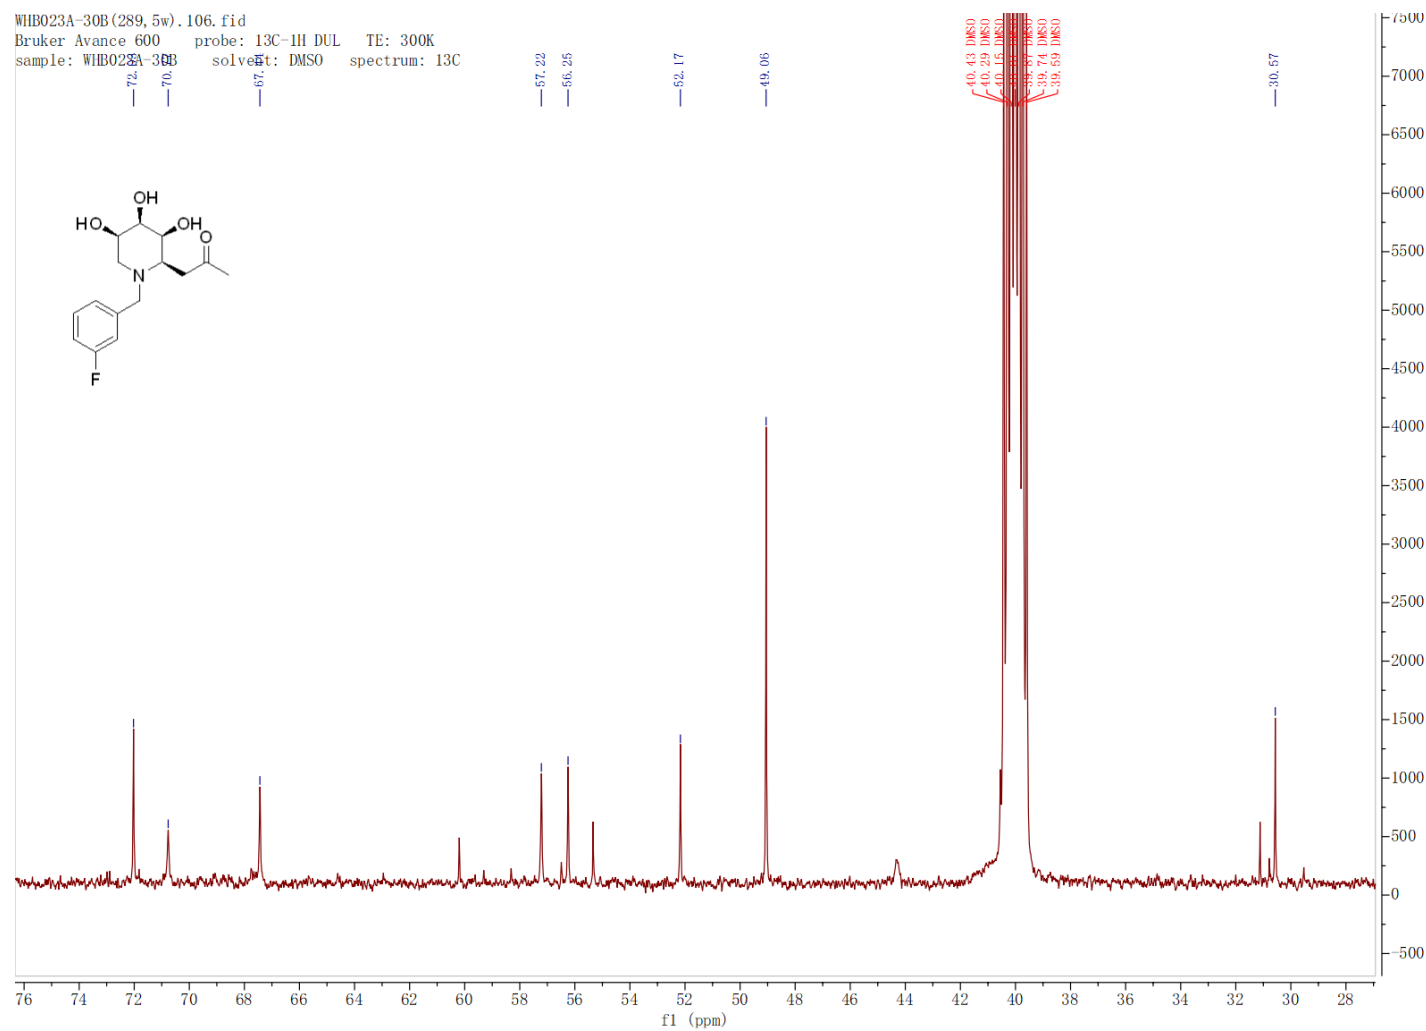

**Figure S105.** Partial region amplification of the  $^{13}\text{C}$  NMR of compound 5z.

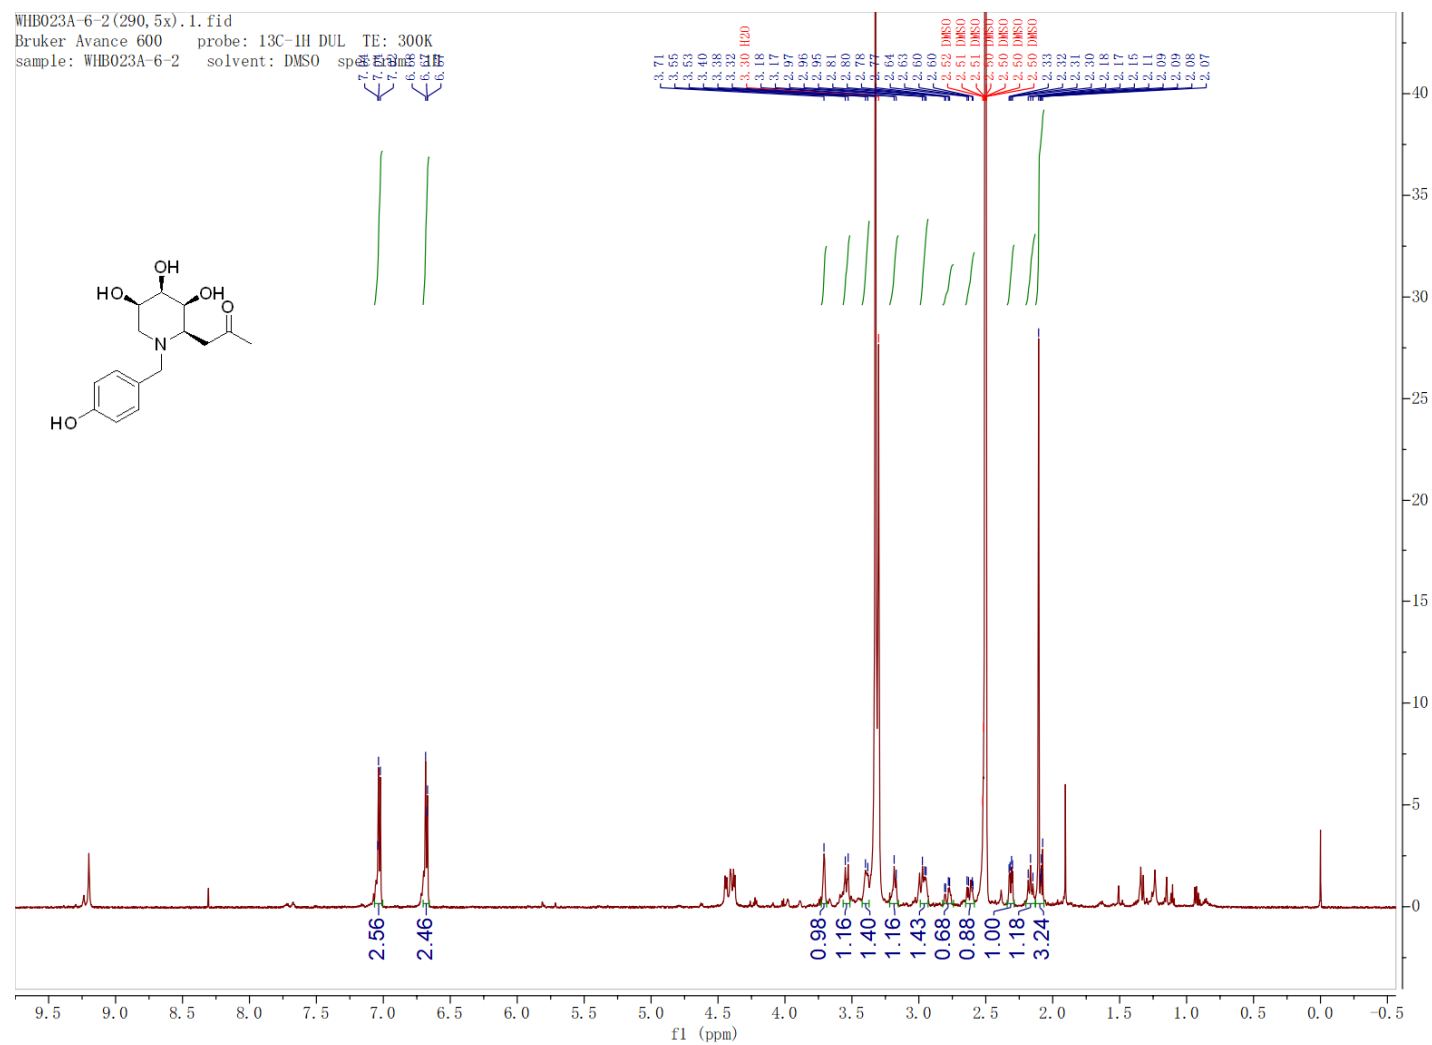

Figure S106. The  $^1\text{H}$  NMR of compound 5λ.

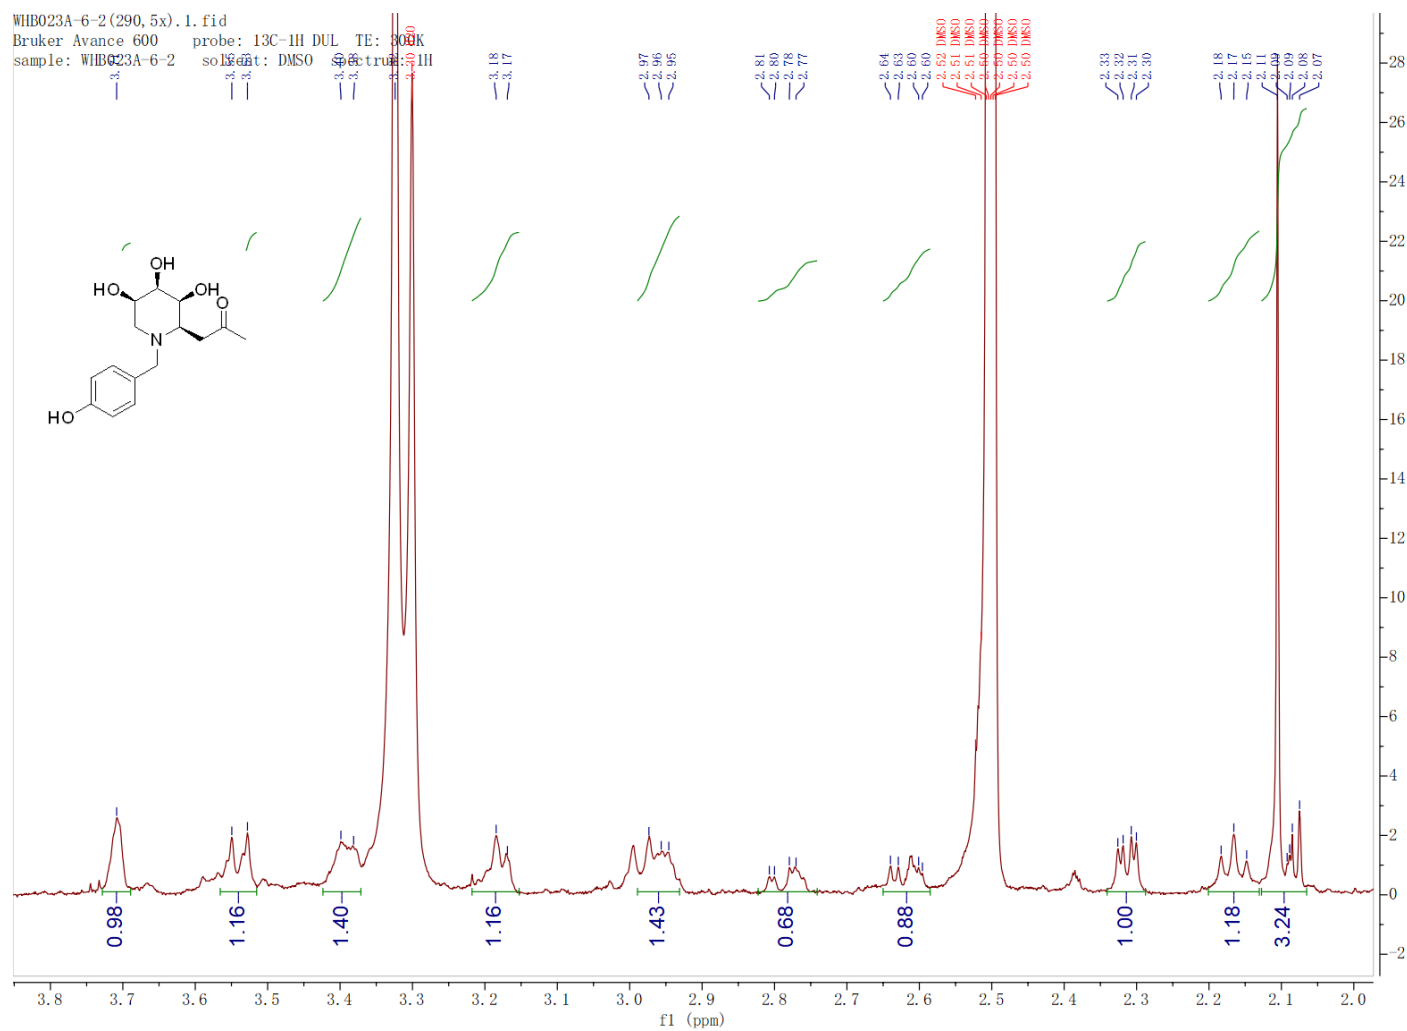

Figure S107. Partial region amplification of the  $^1\text{H}$  NMR of compound 5λ.



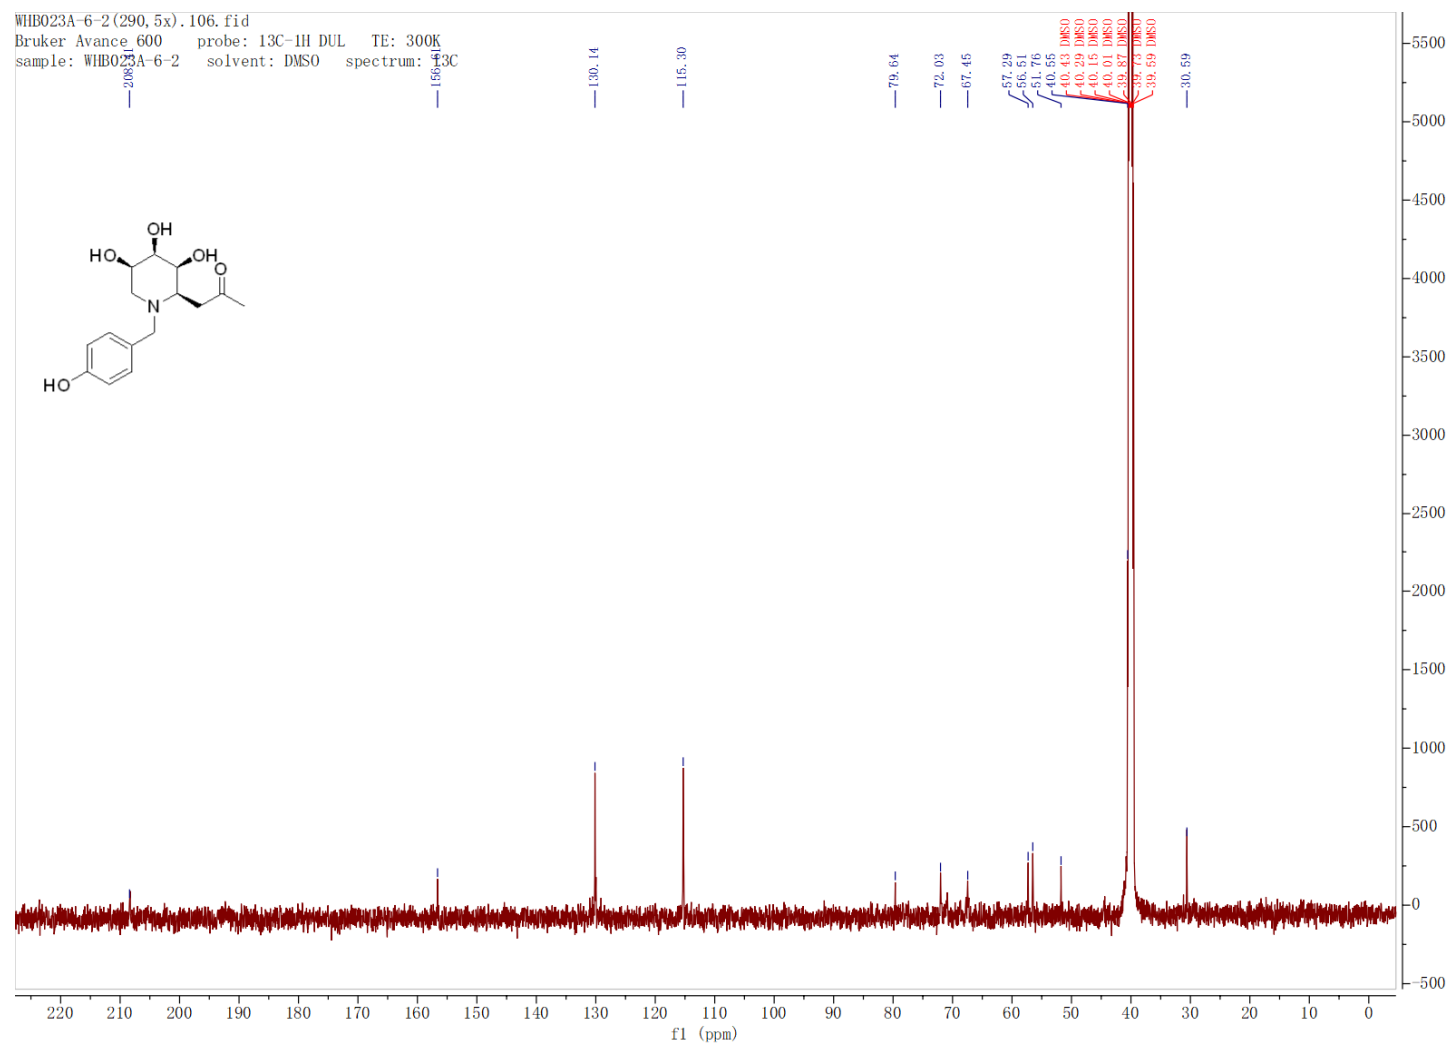

Figure S108. The  $^{13}\text{C}$  NMR of compound 5A.

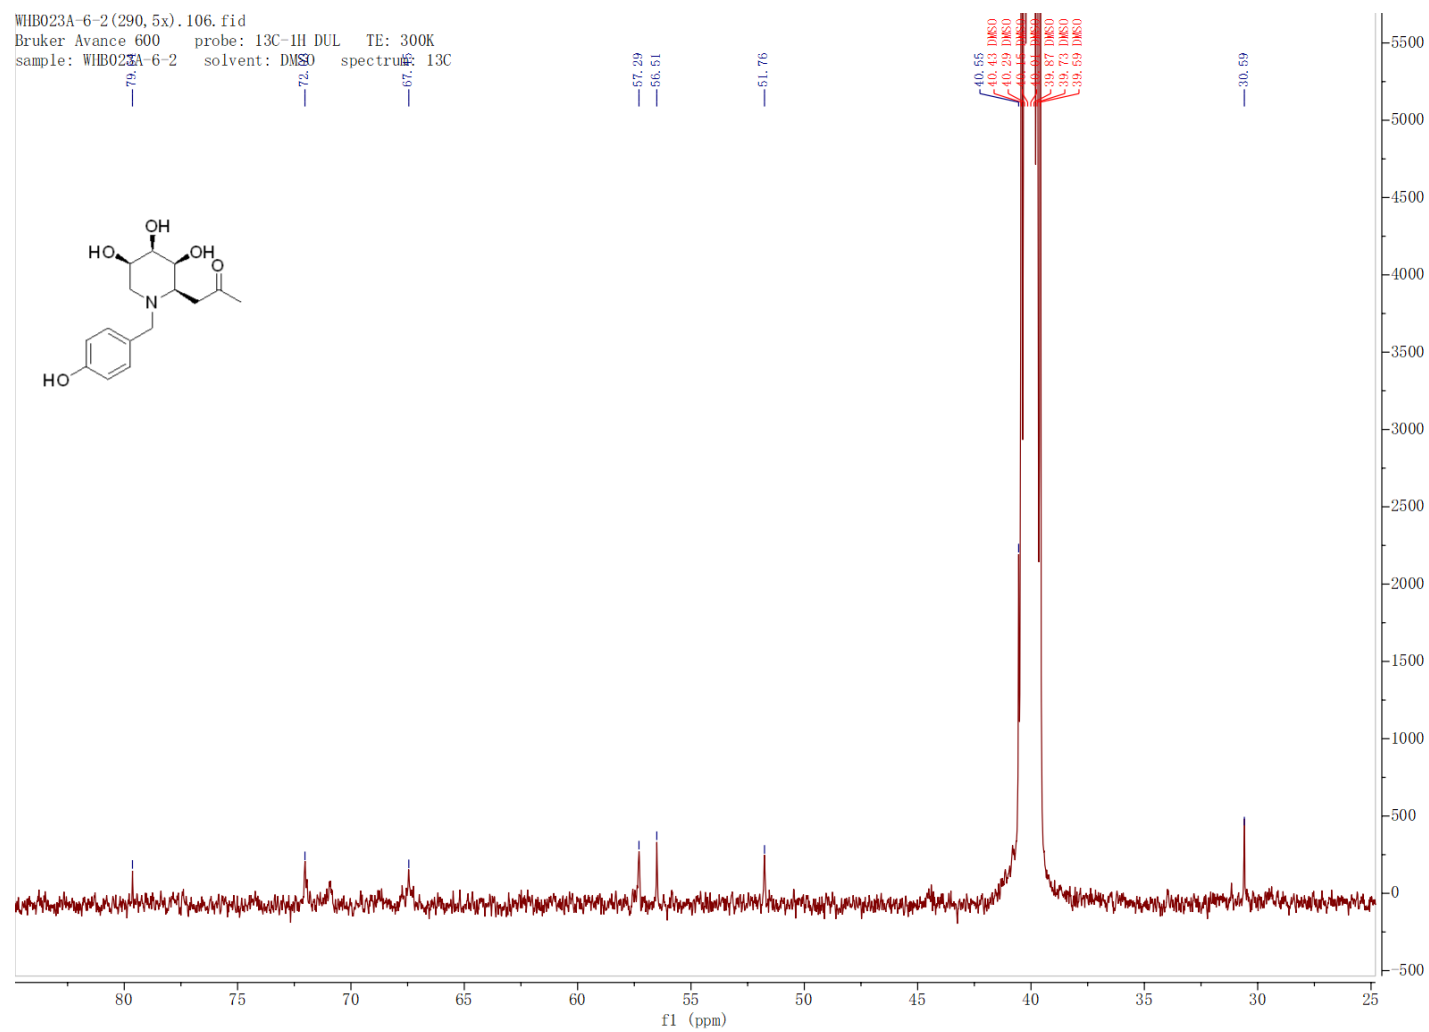

Figure S109. Partial region amplification of the  $^{13}\text{C}$  NMR of compound 5λ.



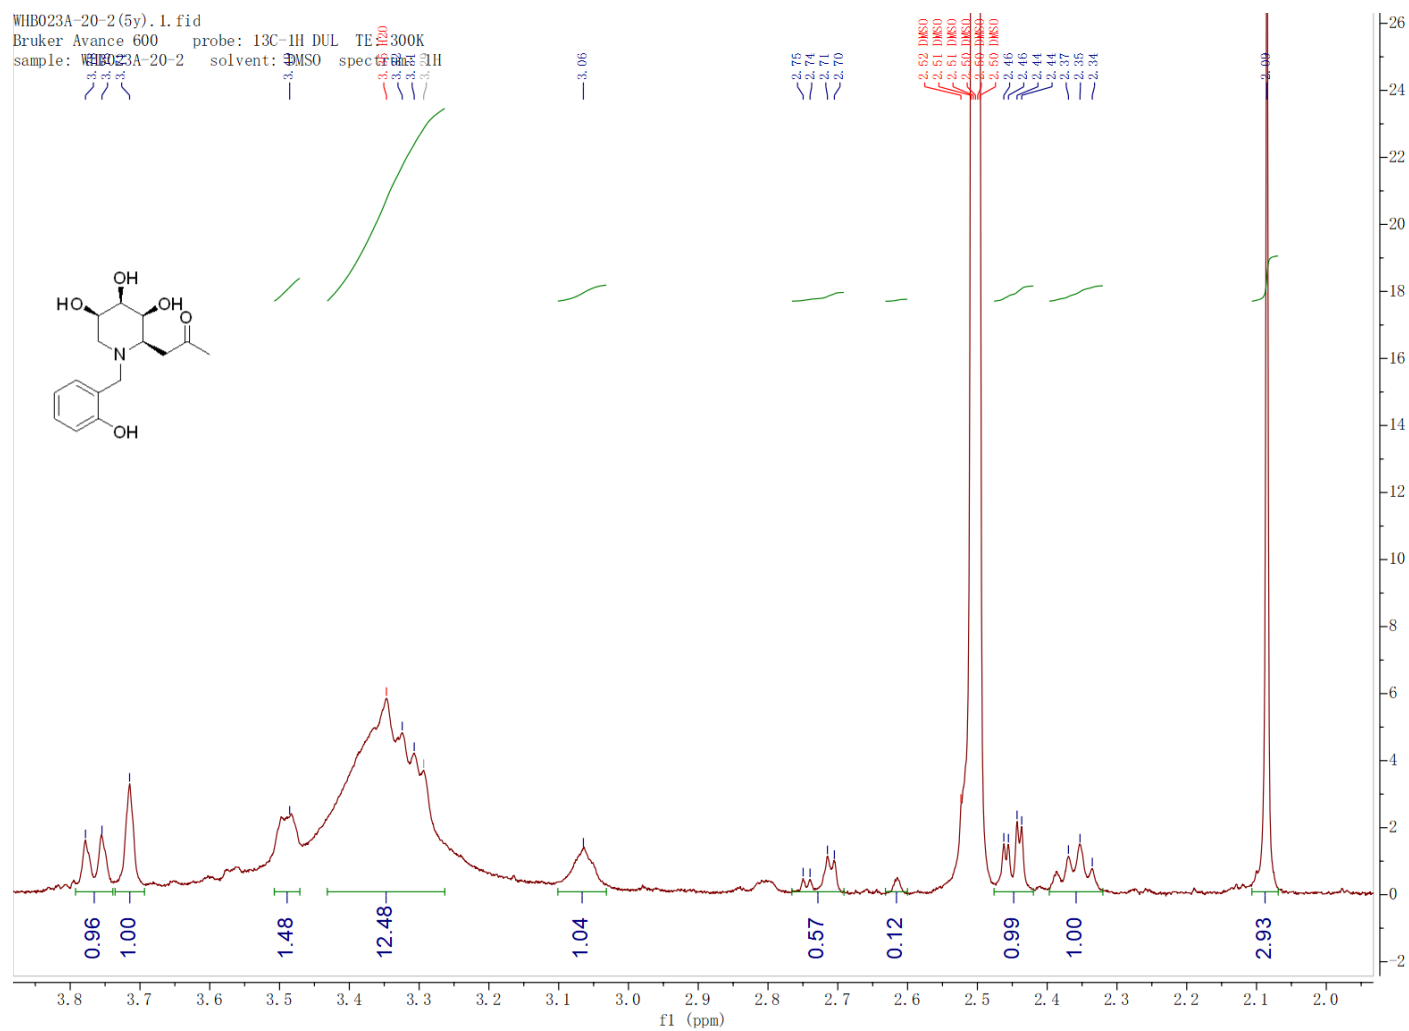

**Figure S111.** Partial region amplification of the  $^1\text{H}$  NMR of compound **50**.

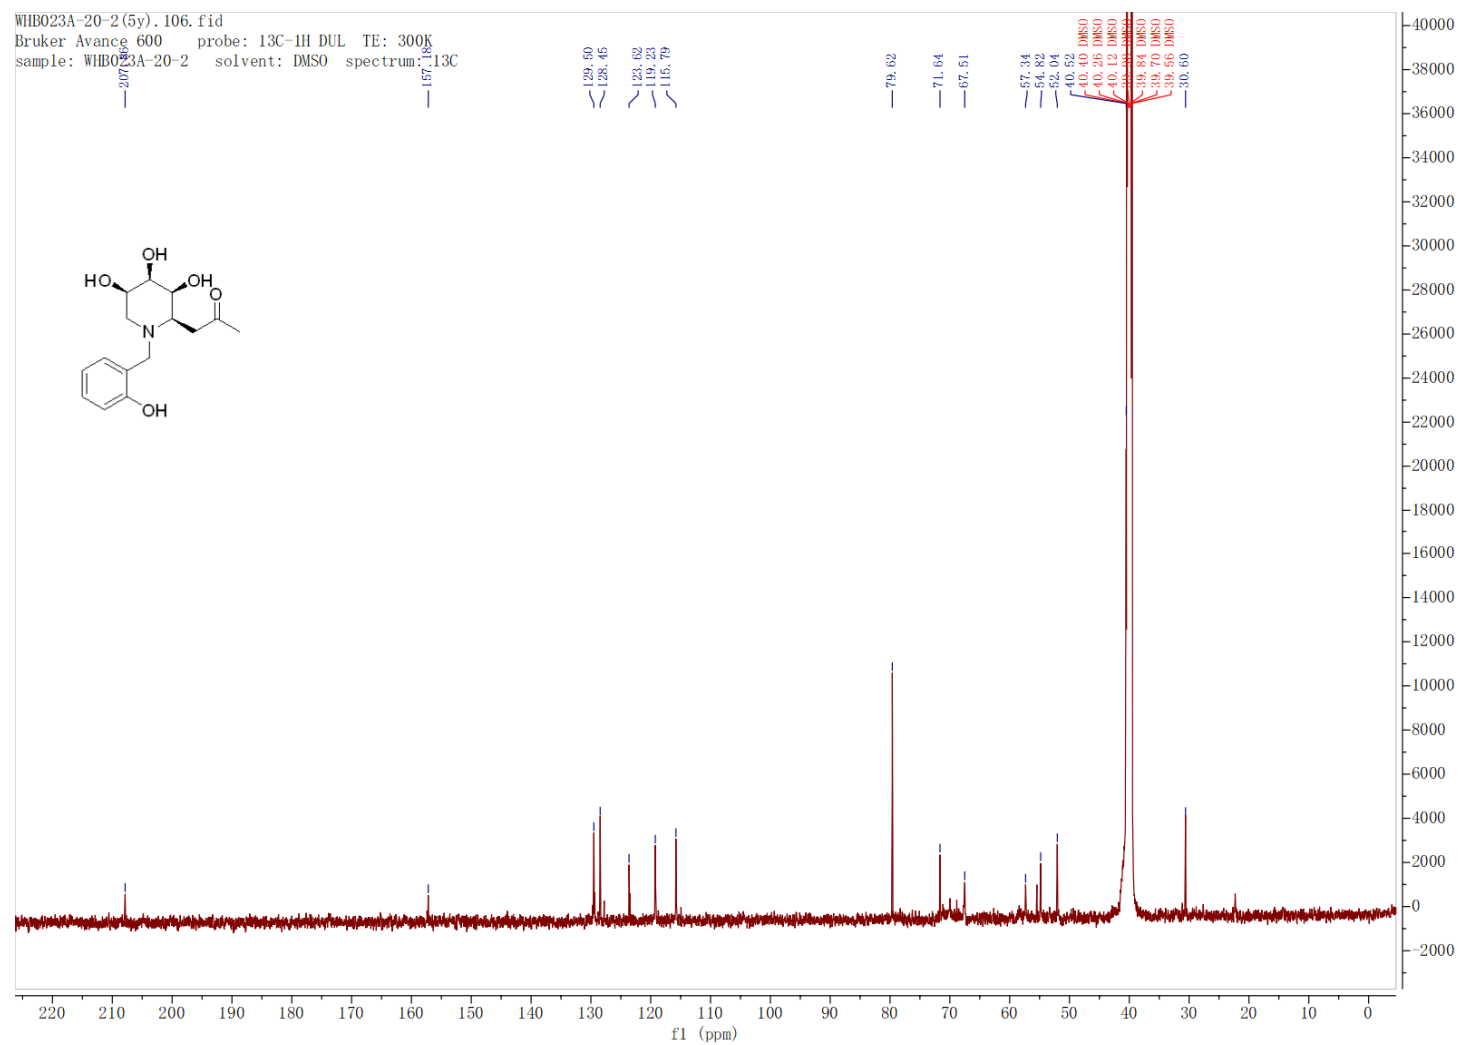

Figure S112. The  $^{13}\text{C}$  NMR of compound 50.

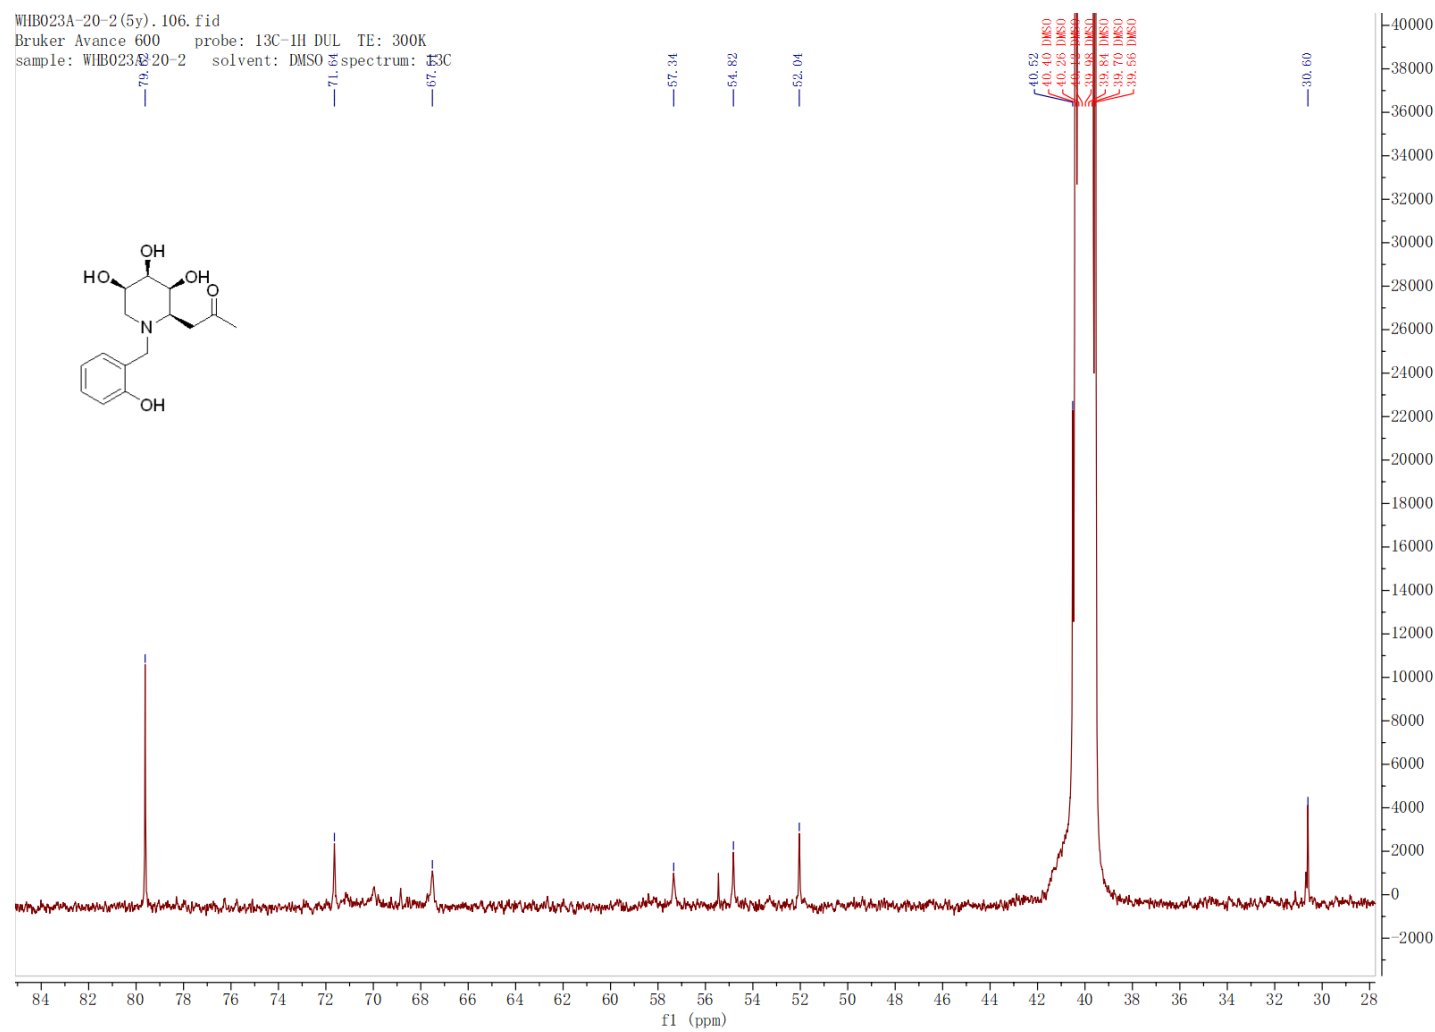

**Figure S113.** Partial region amplification of the  $^{13}\text{C}$  NMR of compound **50**.

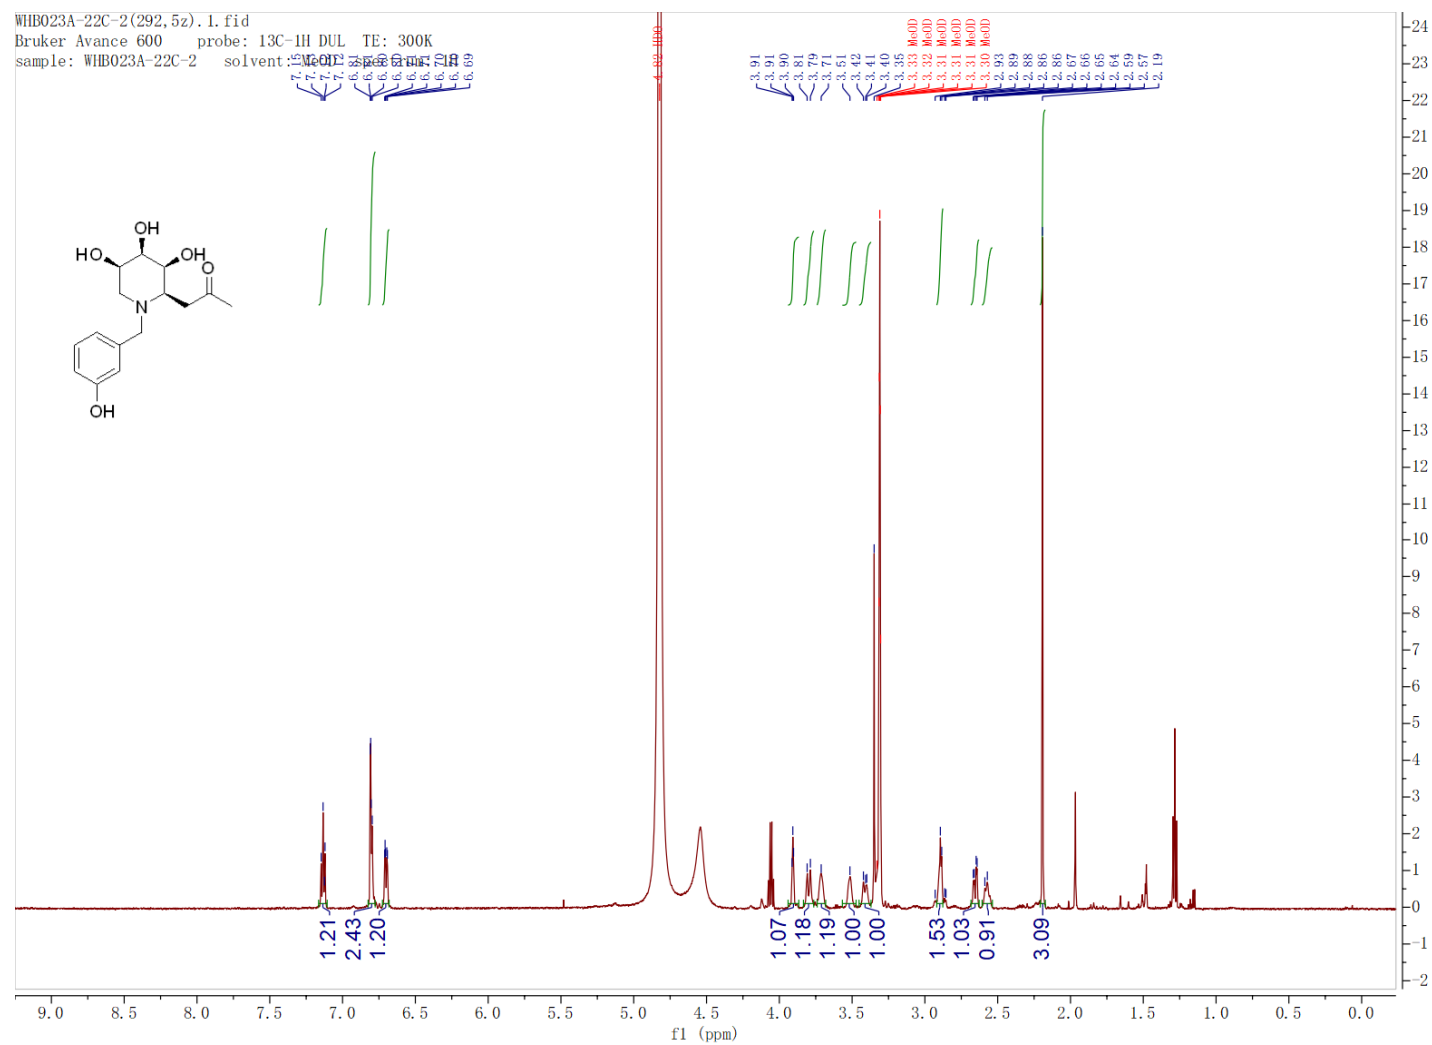

Figure S114. The  $^1\text{H}$  NMR of compound 5π.

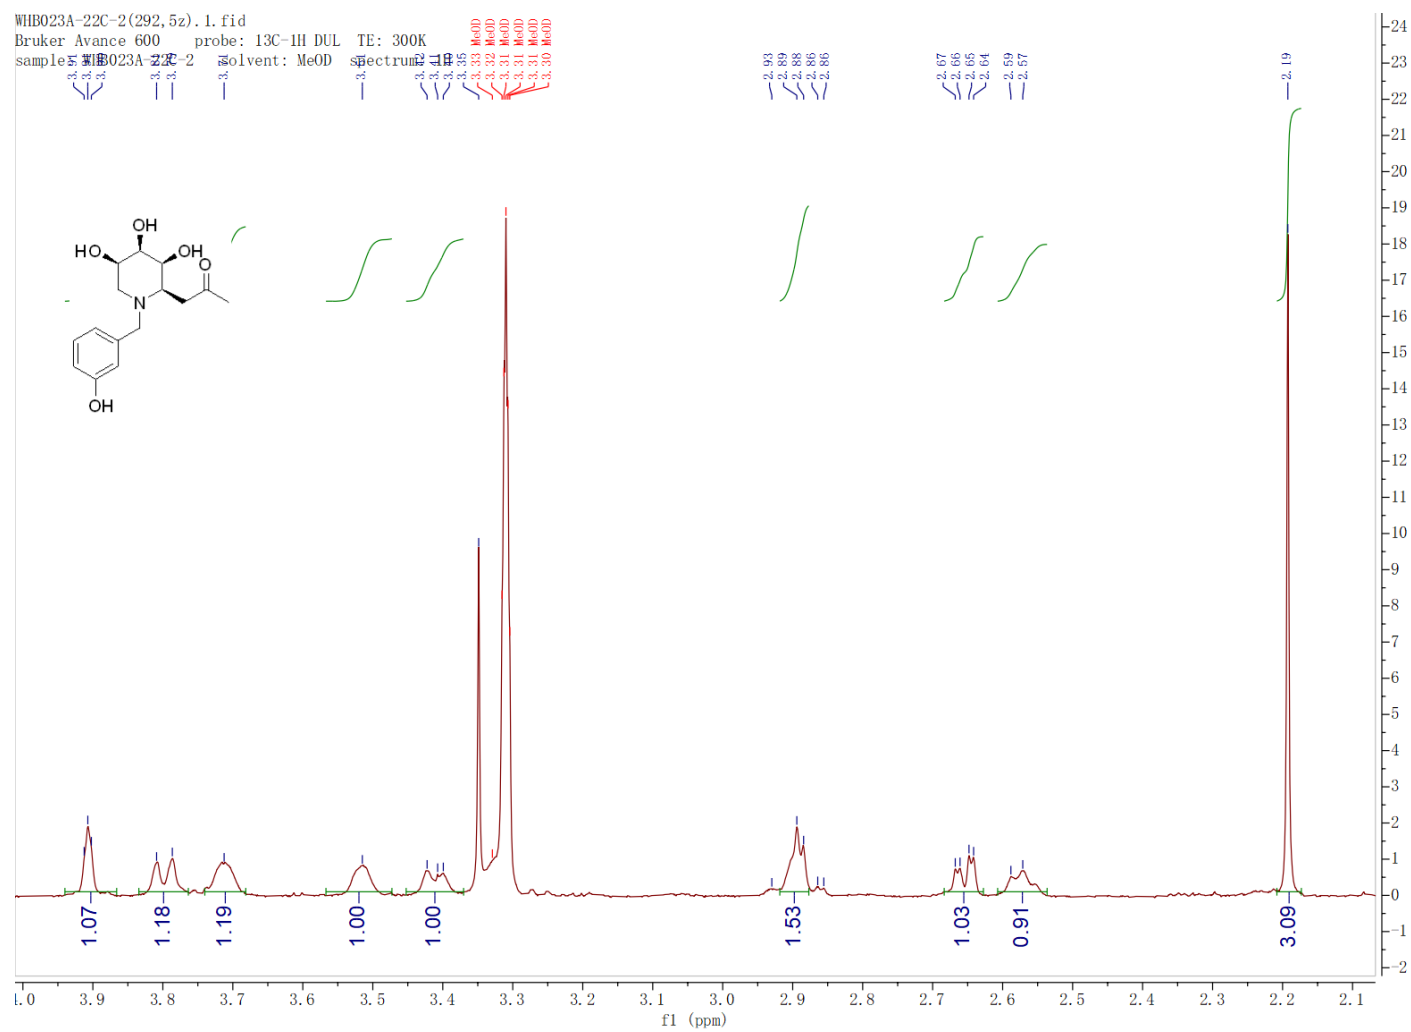

**Figure S115.** Partial region amplification of the  $^1\text{H}$  NMR of compound **5π**.



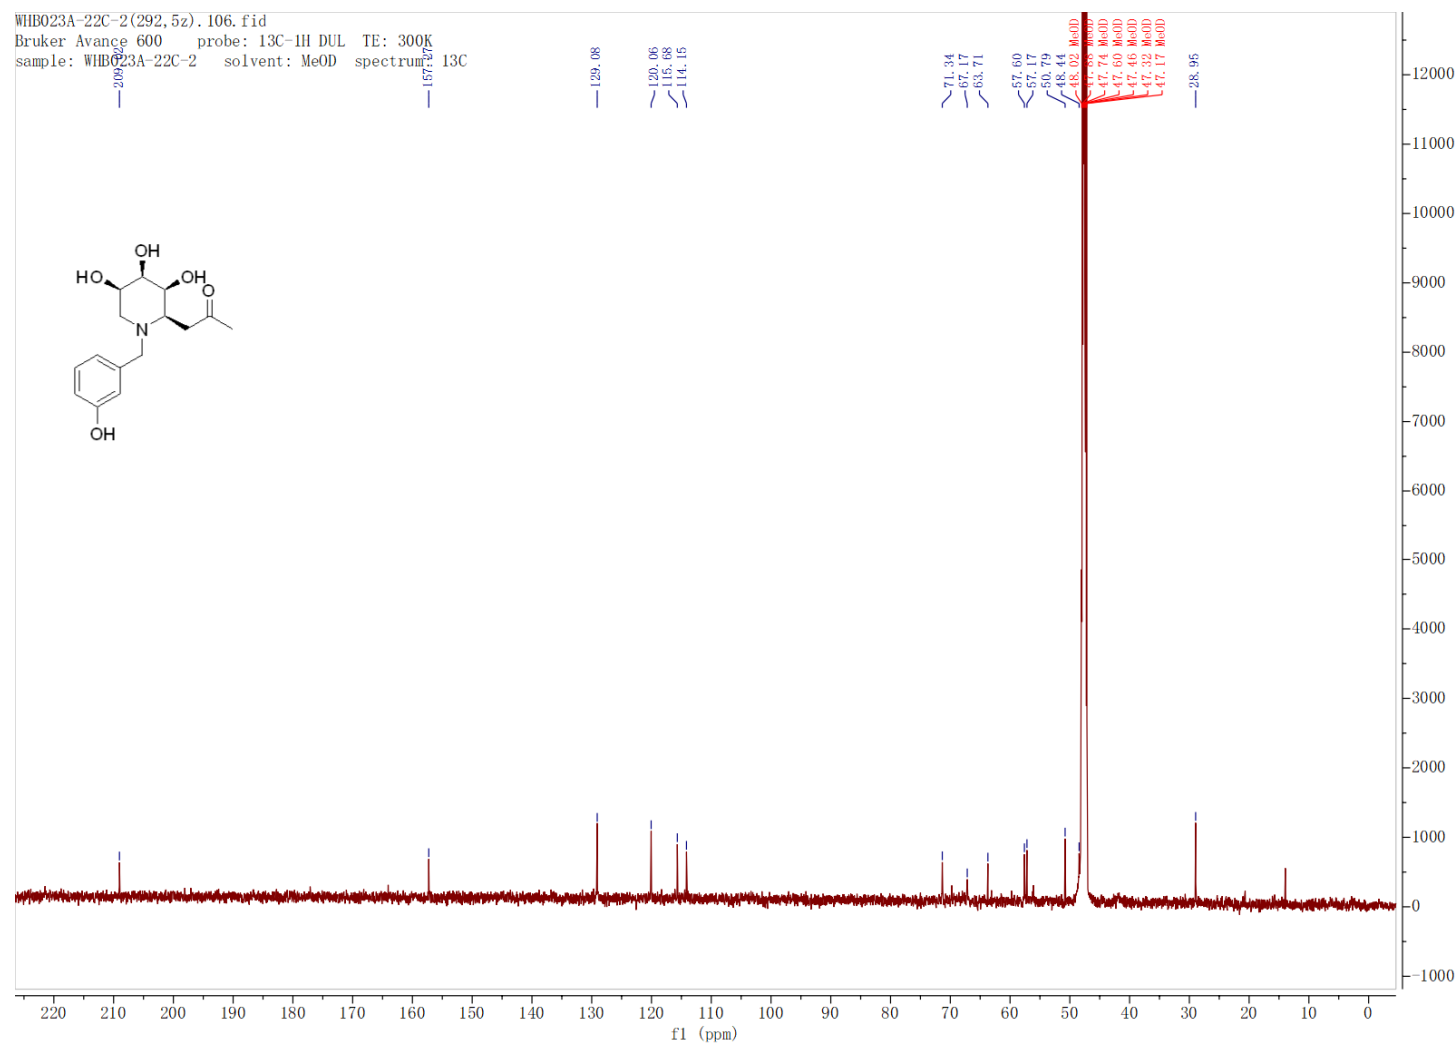

Figure S116. The  $^{13}\text{C}$  NMR of compound **5π**.

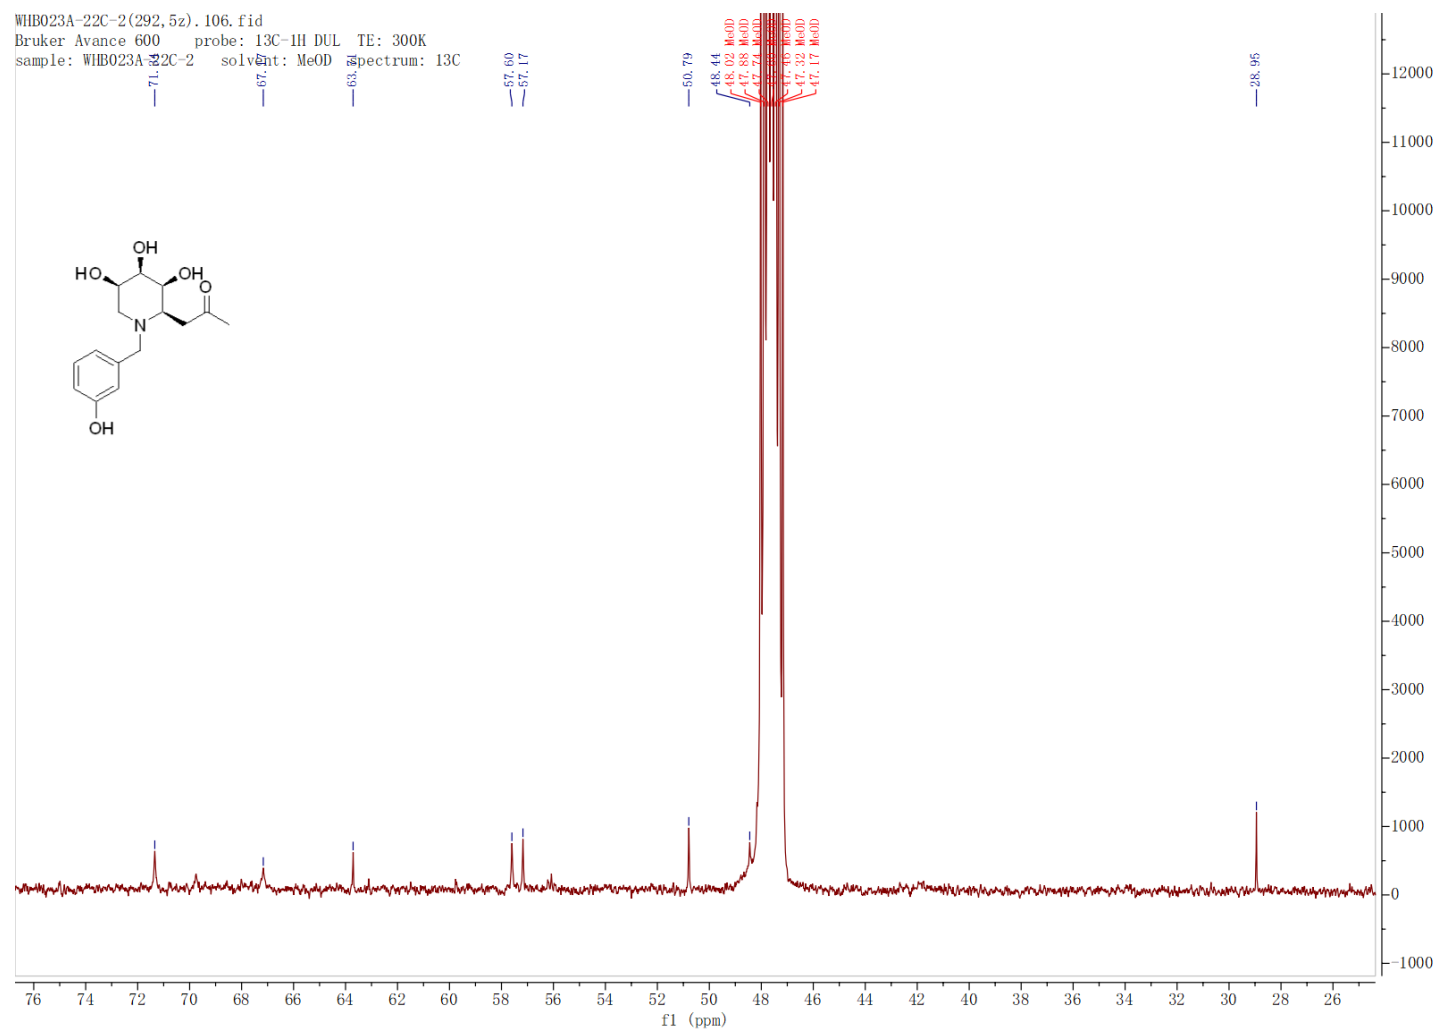

**Figure S117.** Partial region amplification of the  $^{13}\text{C}$  NMR of compound **5π**.

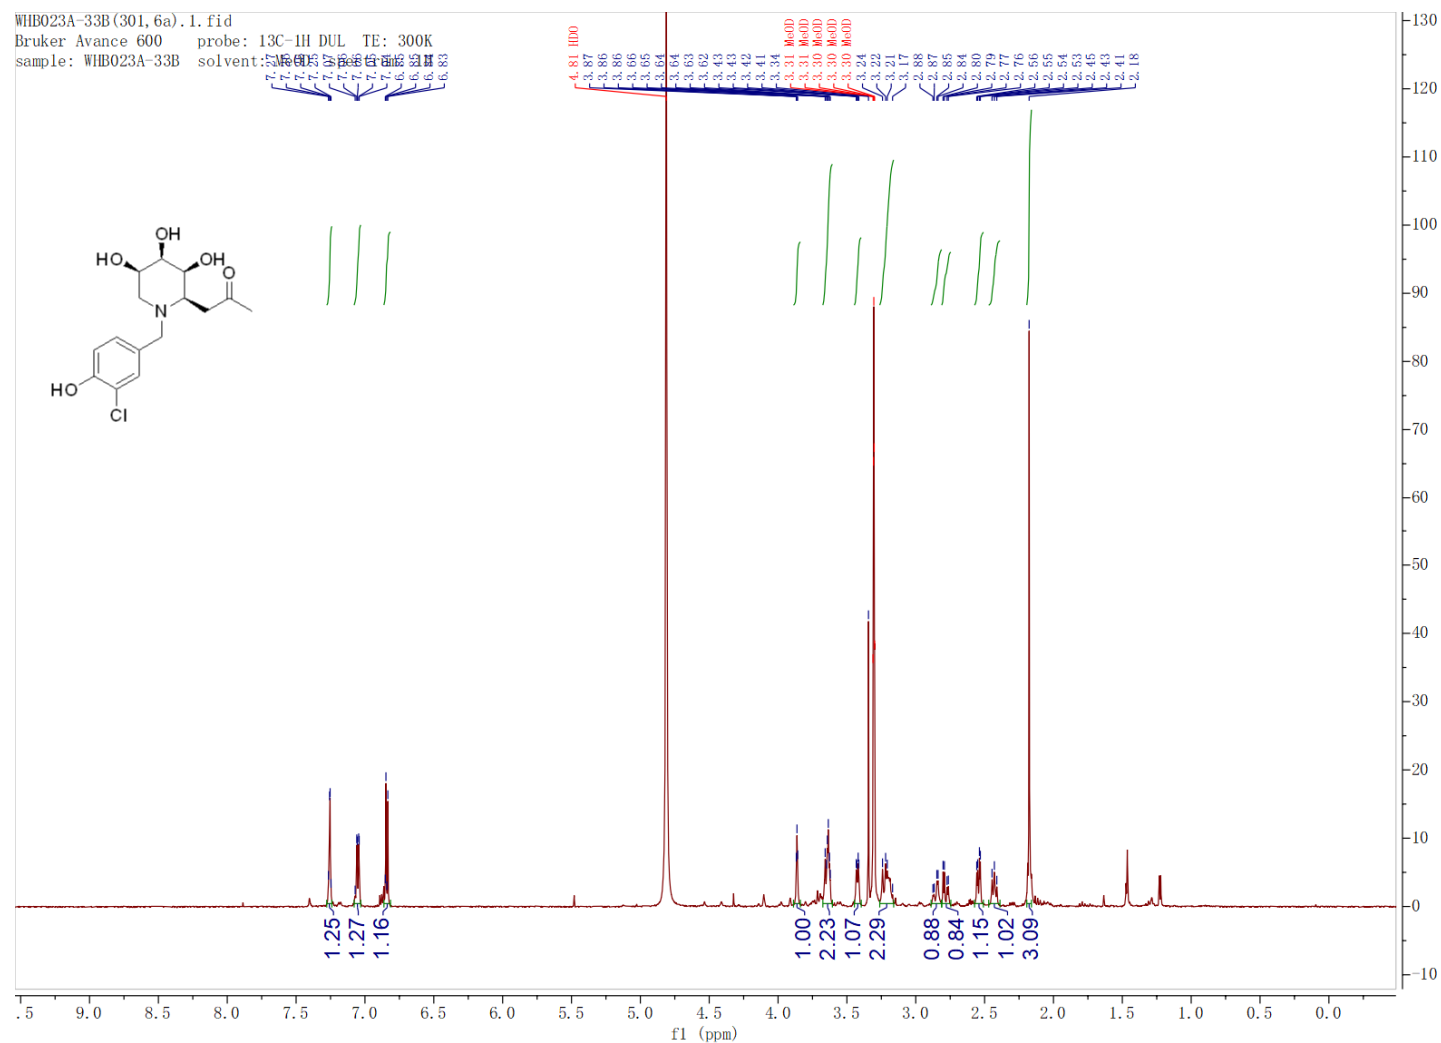

Figure S118. The <sup>1</sup>H NMR of compound 6a.

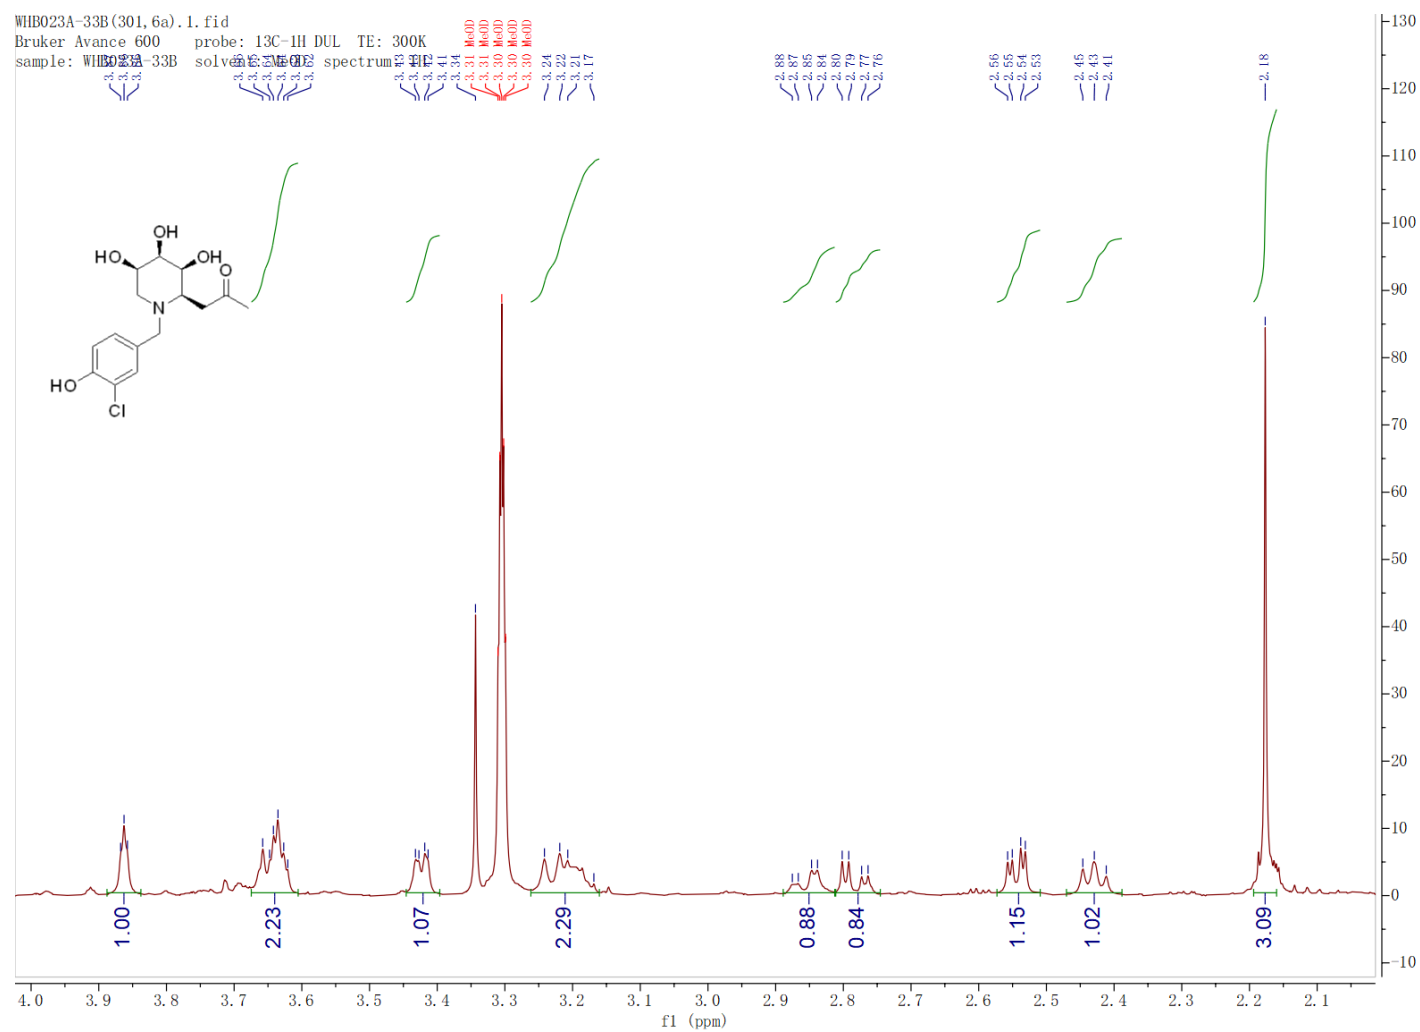

**Figure S119.** Partial region amplification of the  $^1\text{H}$  NMR of compound **6a**.

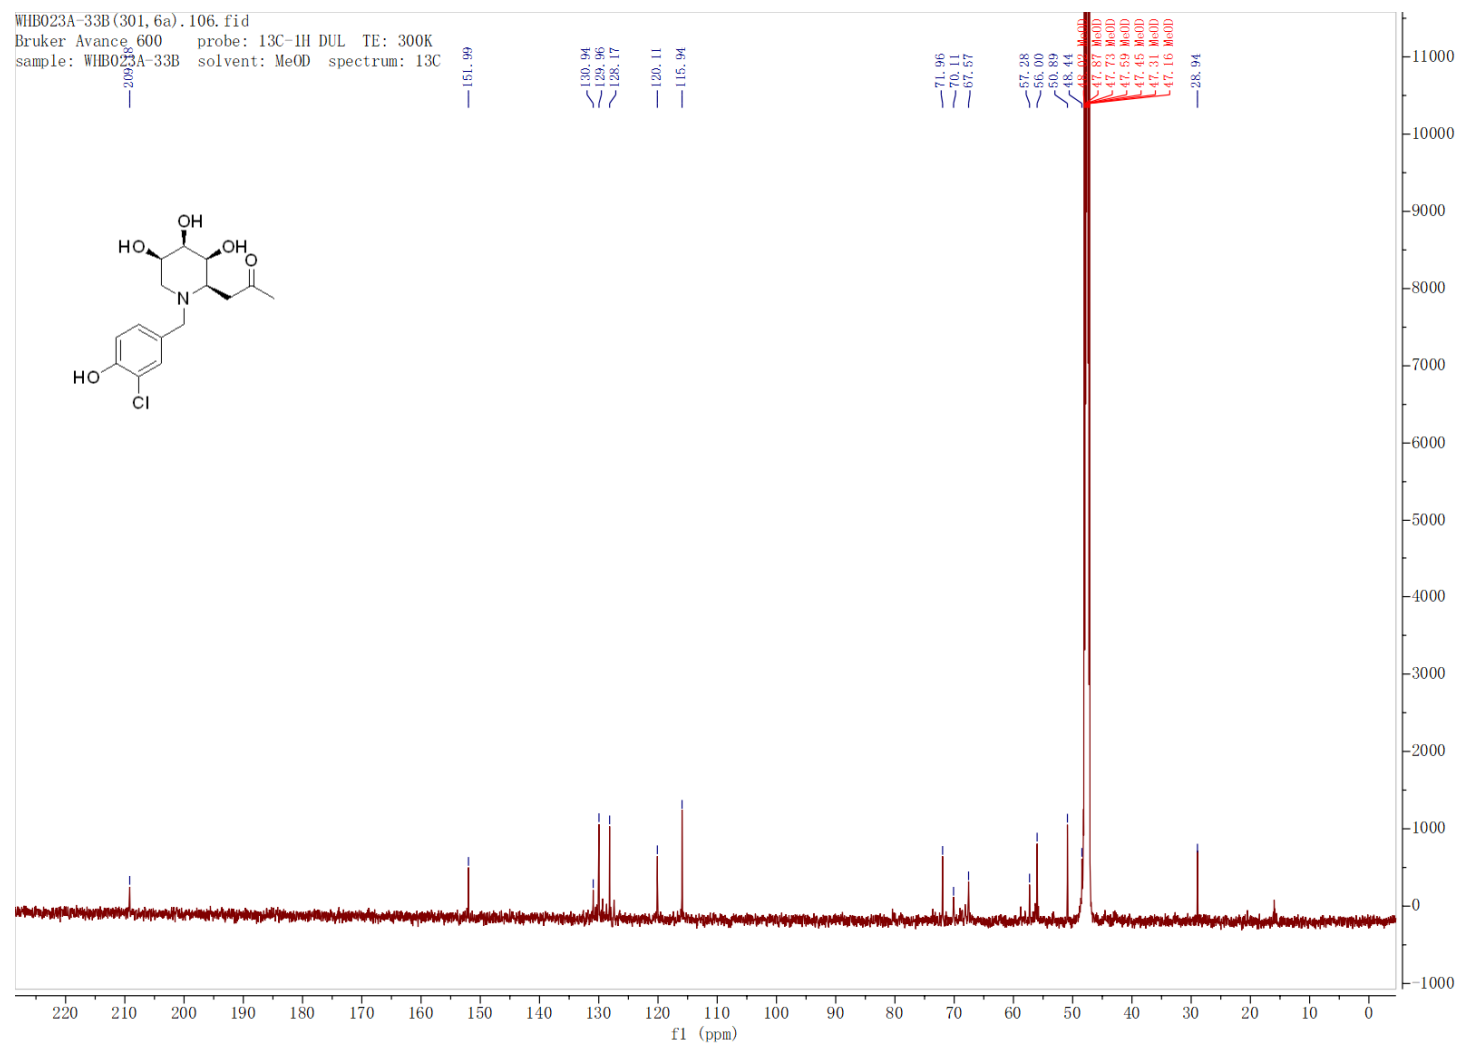

Figure S120. The  $^{13}\text{C}$  NMR of compound 6a.

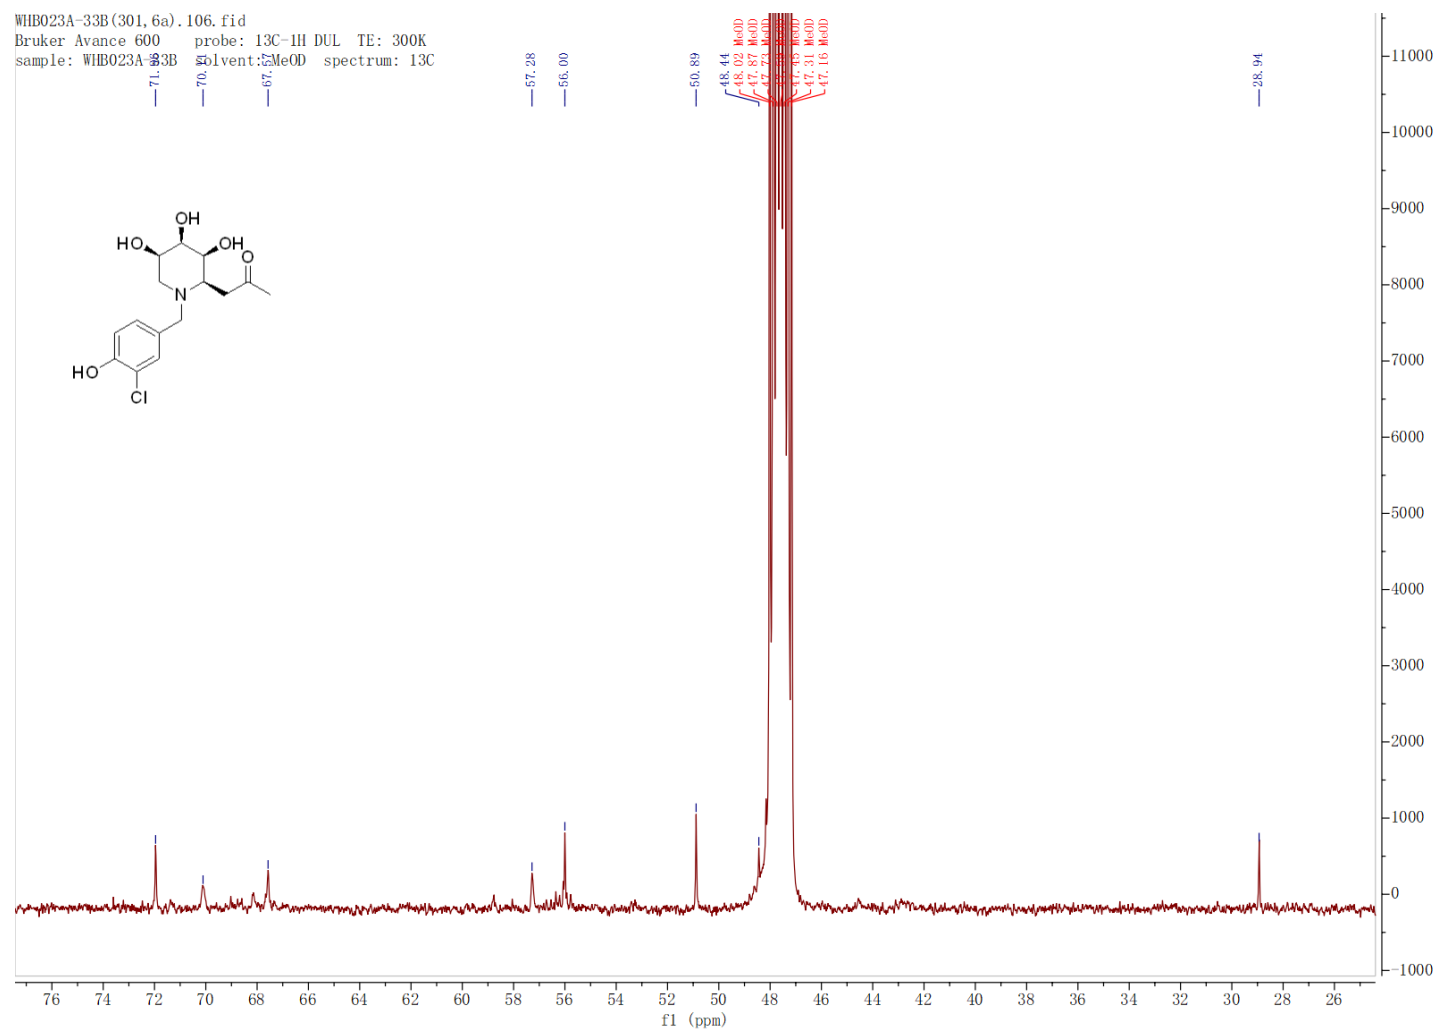

**Figure S121.** Partial region amplification of the  $^{13}\text{C}$  NMR of compound **6a**.



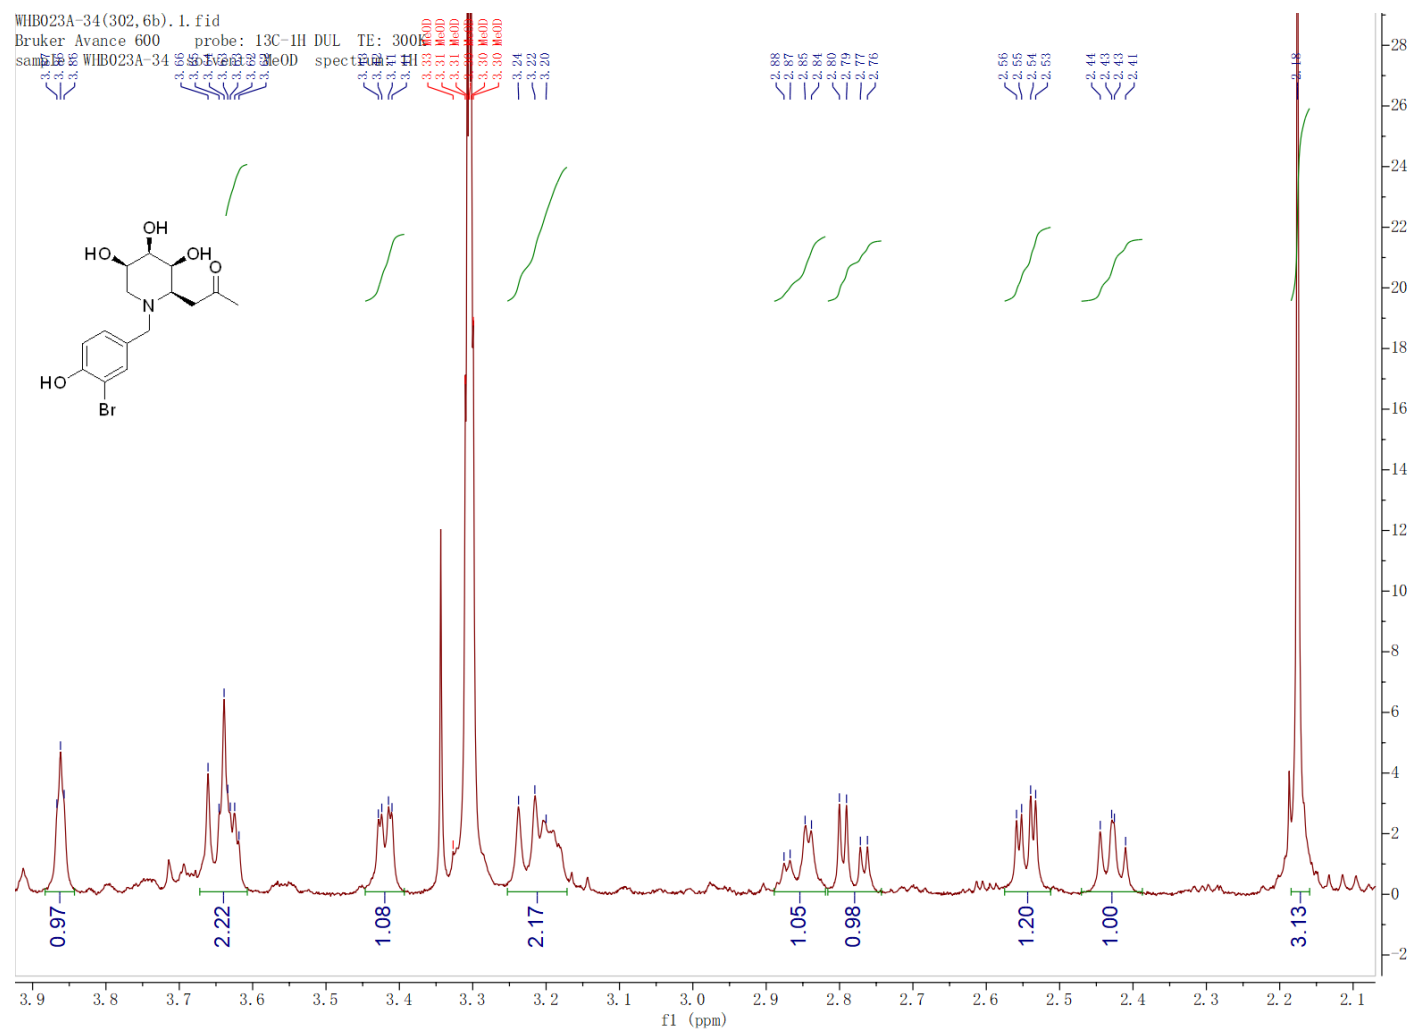

**Figure S123.** Partial region amplification of the <sup>1</sup>H NMR of compound **6b**.



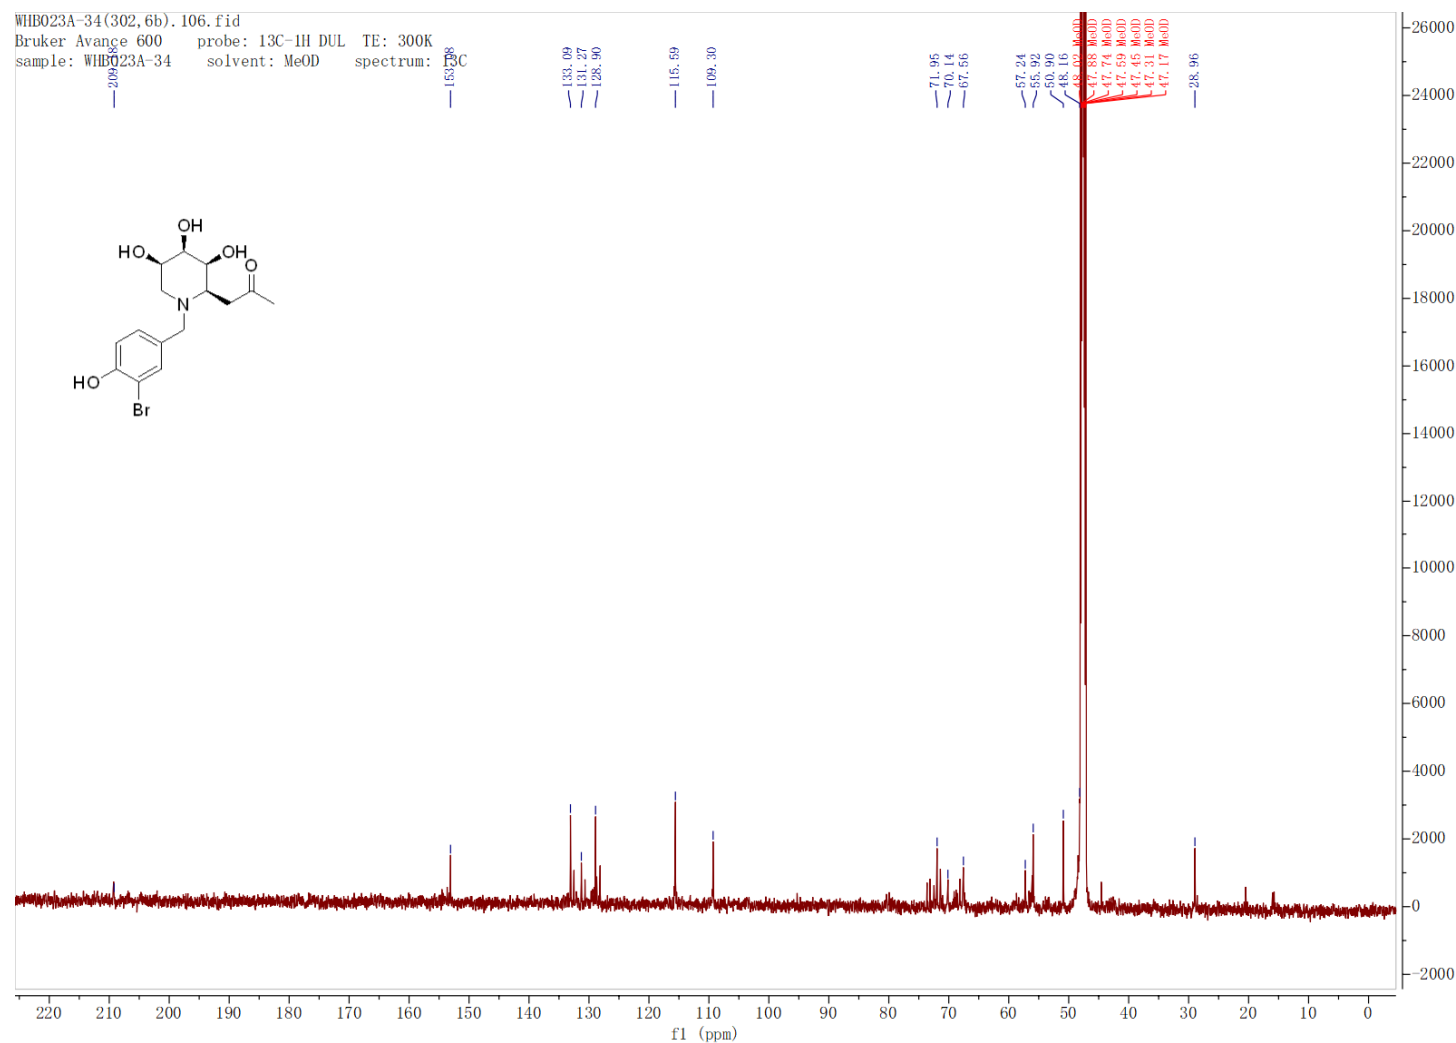

Figure S124. The  $^{13}\text{C}$  NMR of compound **6b**.

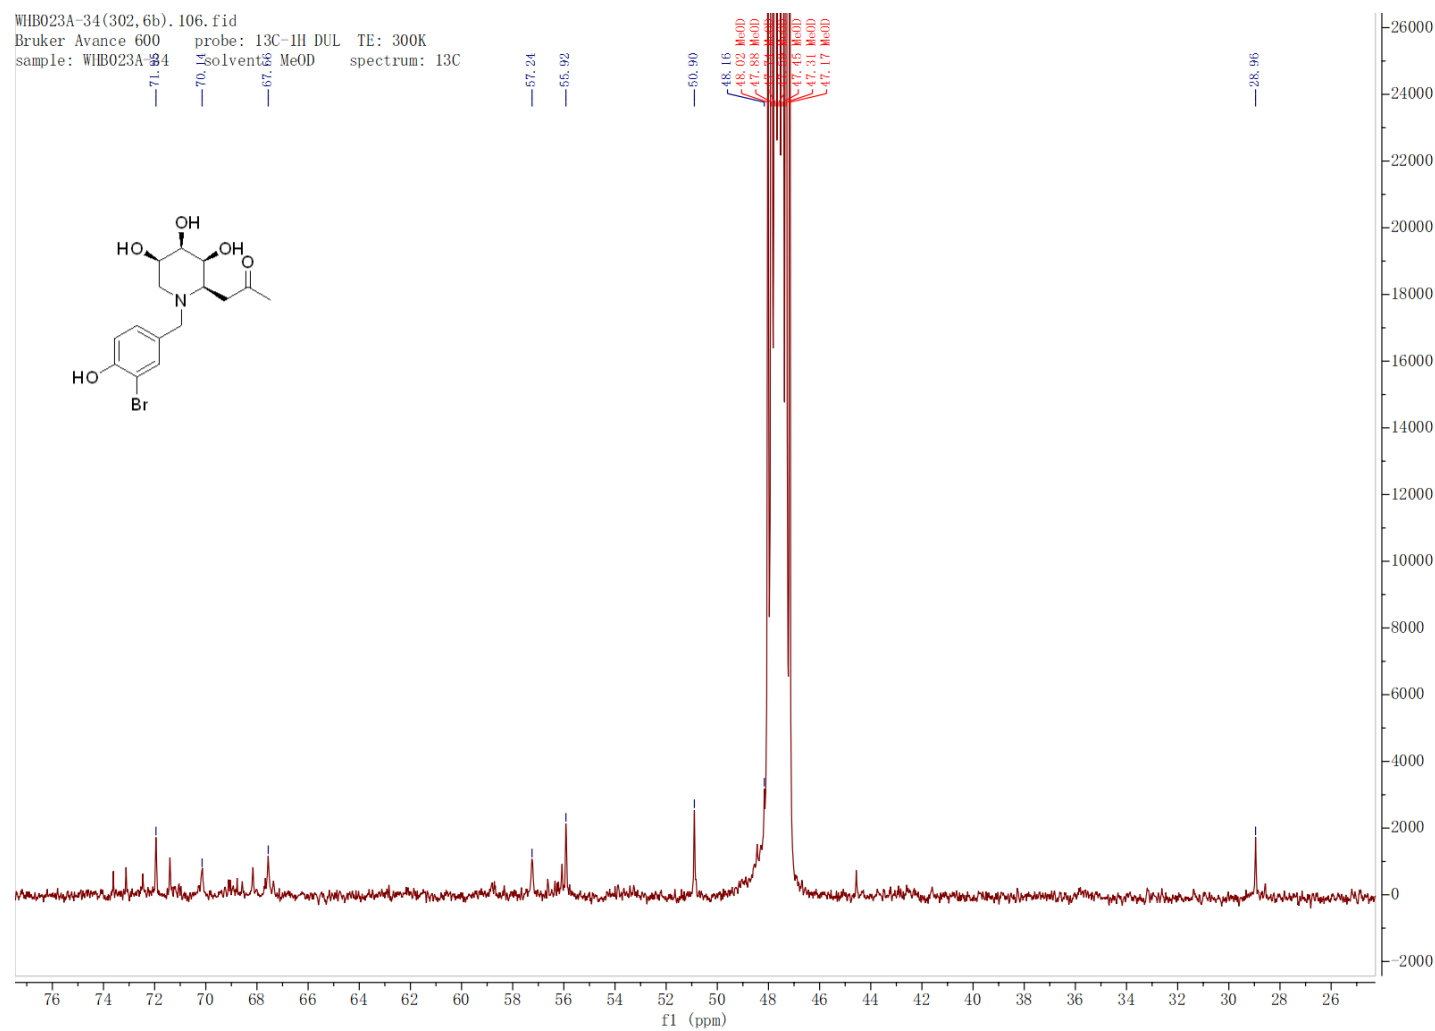

**Figure S125.** Partial region amplification of the  $^{13}\text{C}$  NMR of compound **6b**.

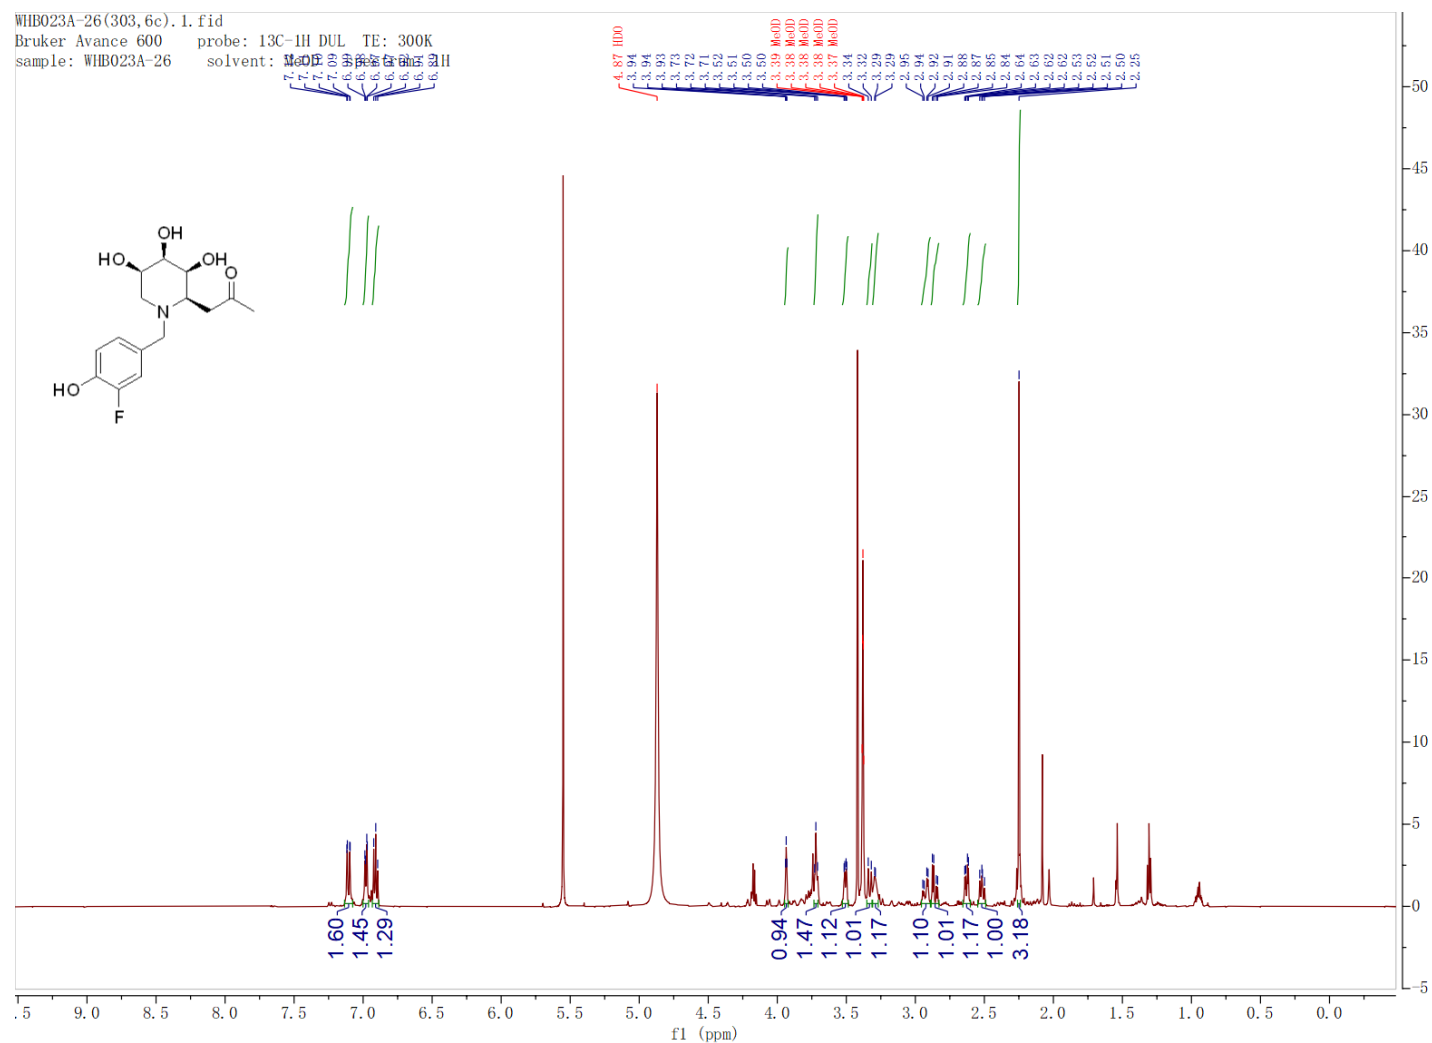

Figure S126. The  $^1\text{H}$  NMR of compound 6c.

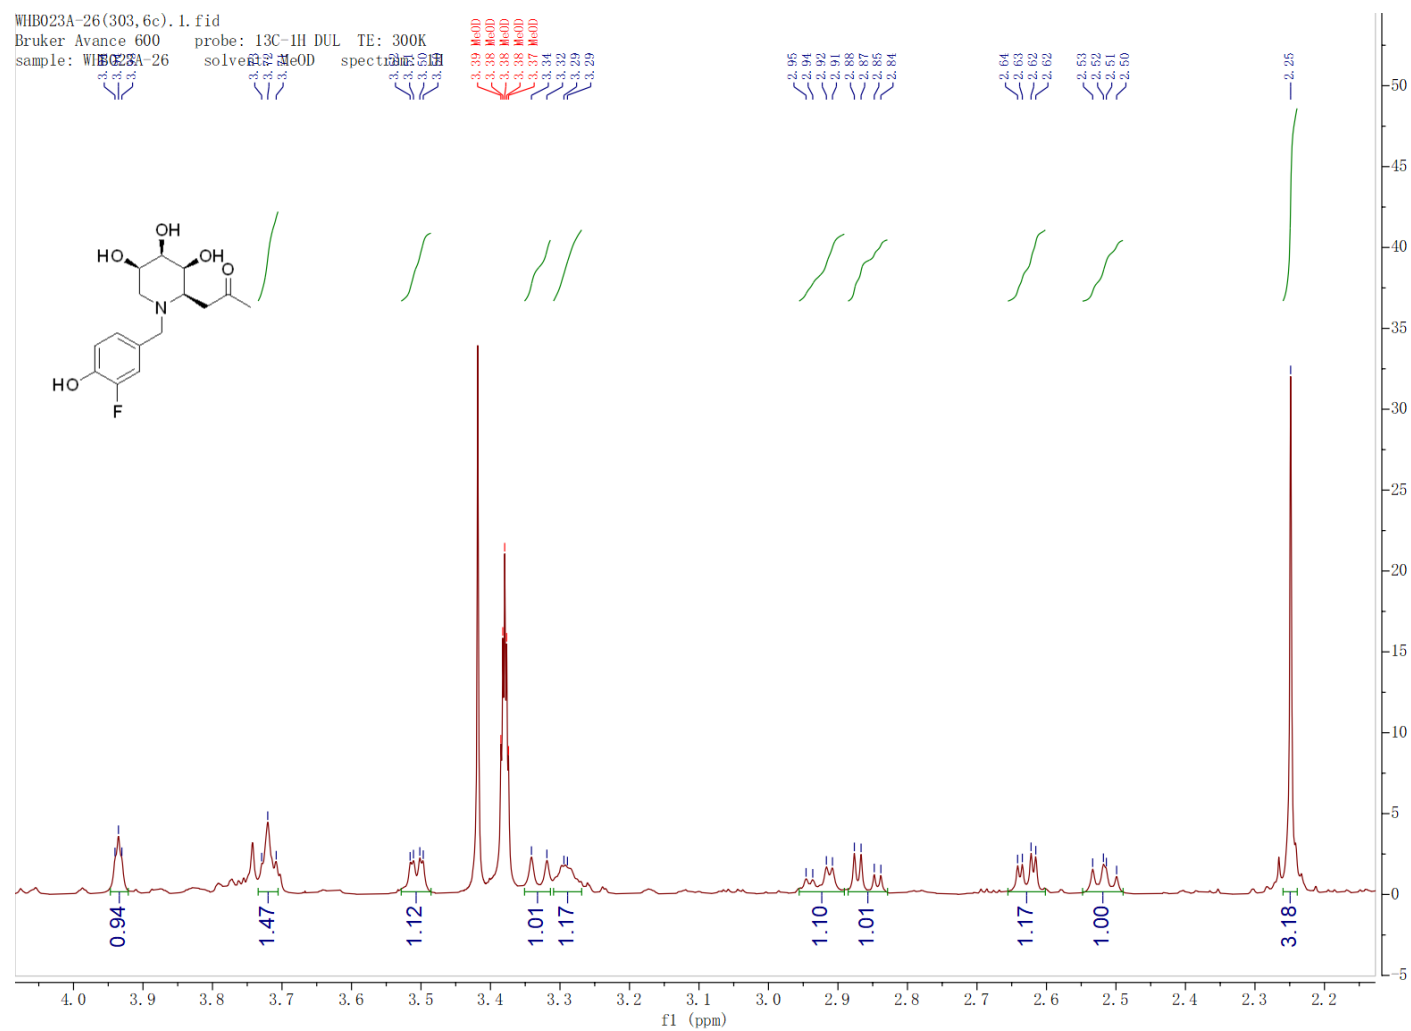

Figure S127. Partial region amplification of the  $^1\text{H}$  NMR of compound 6c.

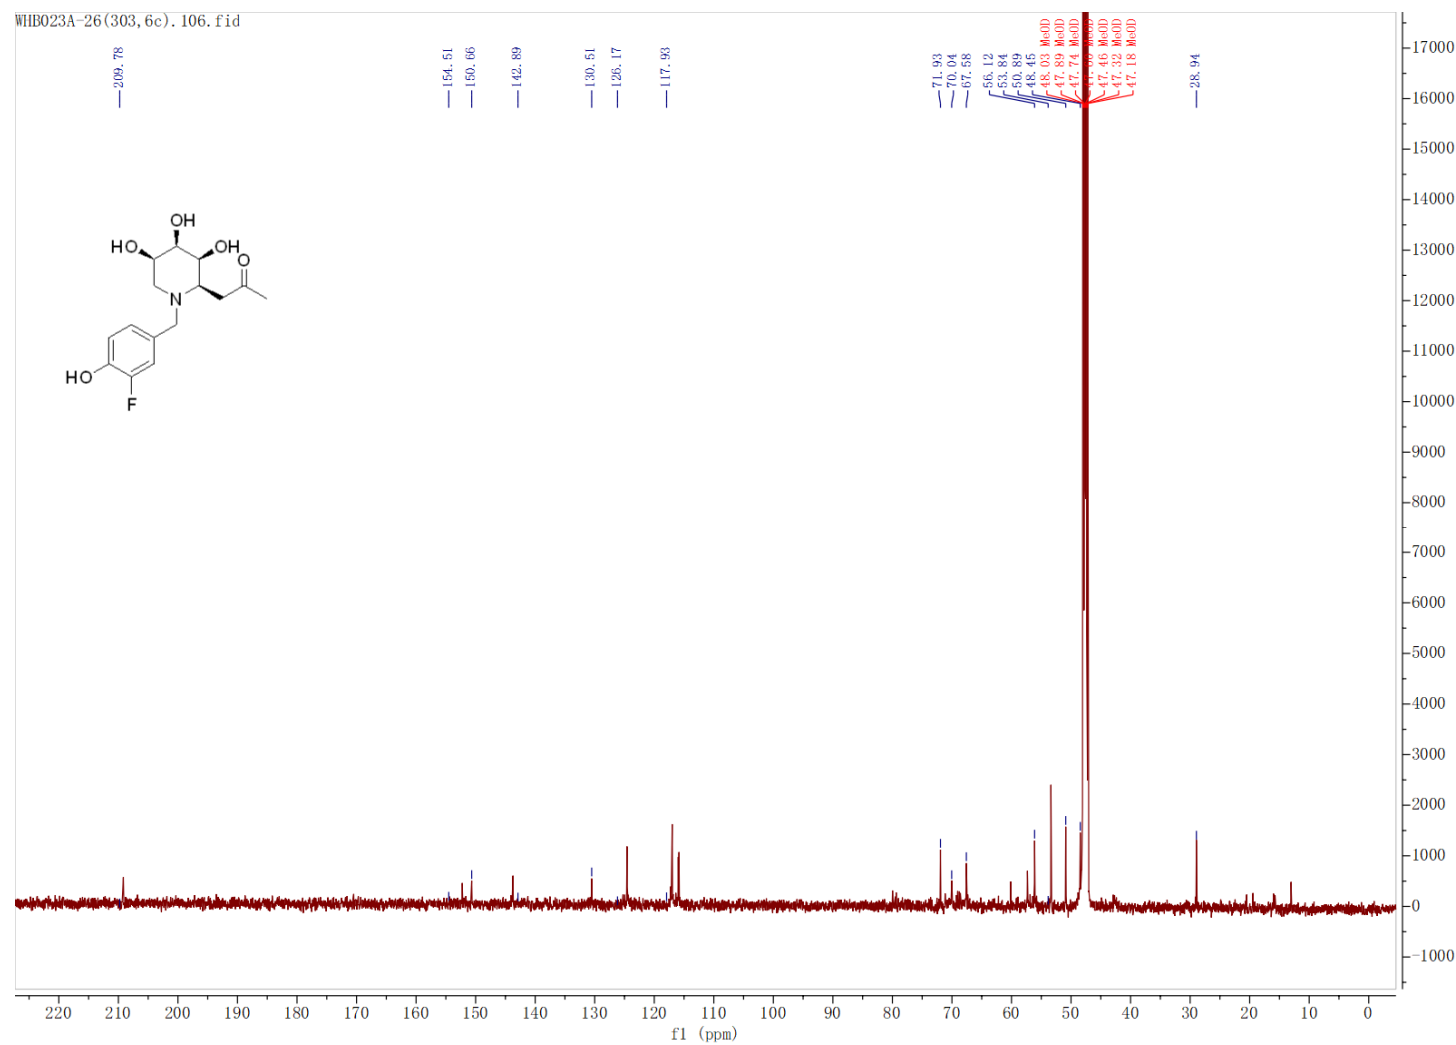

Figure S128. The  $^{13}\text{C}$  NMR of compound 6c.

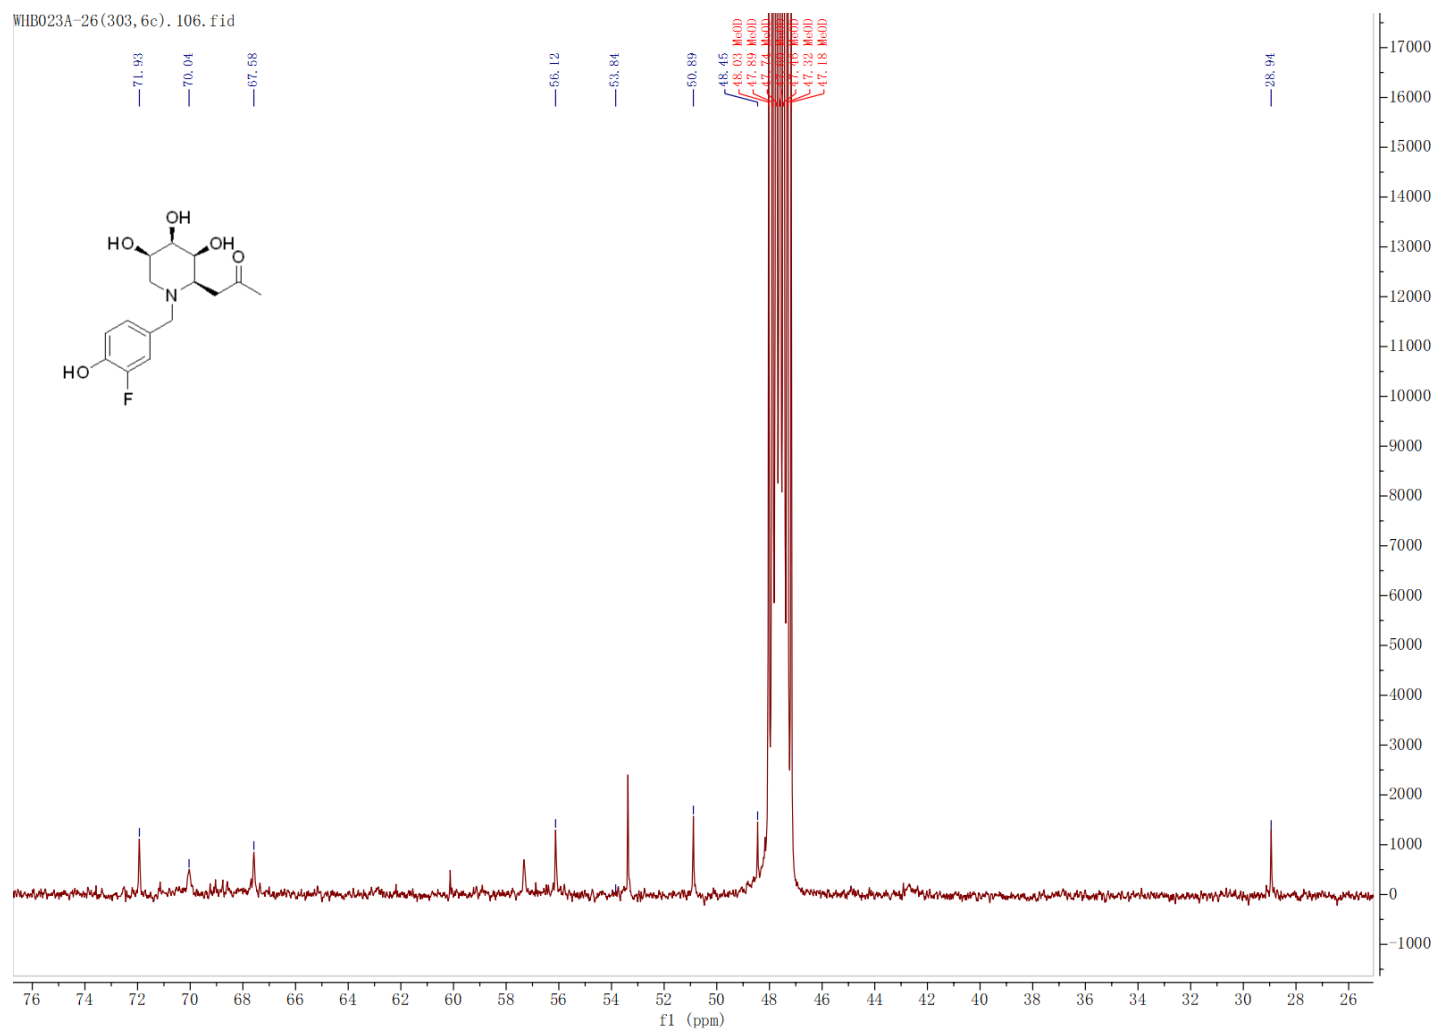

**Figure S129.** Partial region amplification of the  $^{13}\text{C}$  NMR of compound **6c**.

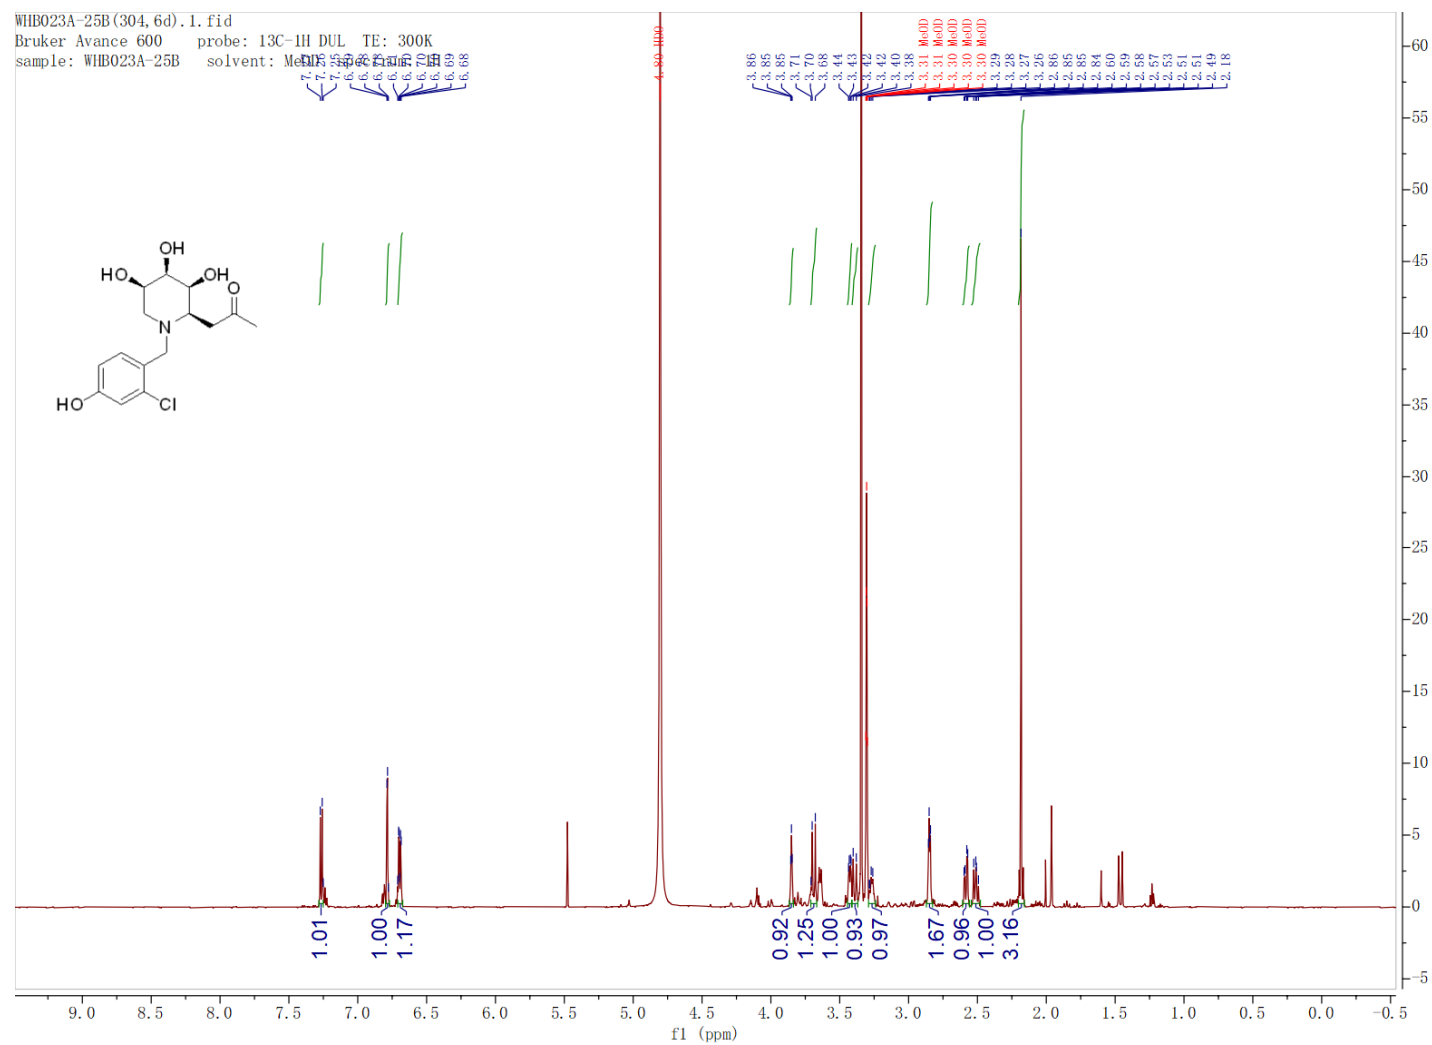

Figure S130. The  $^1\text{H}$  NMR of compound 6d.

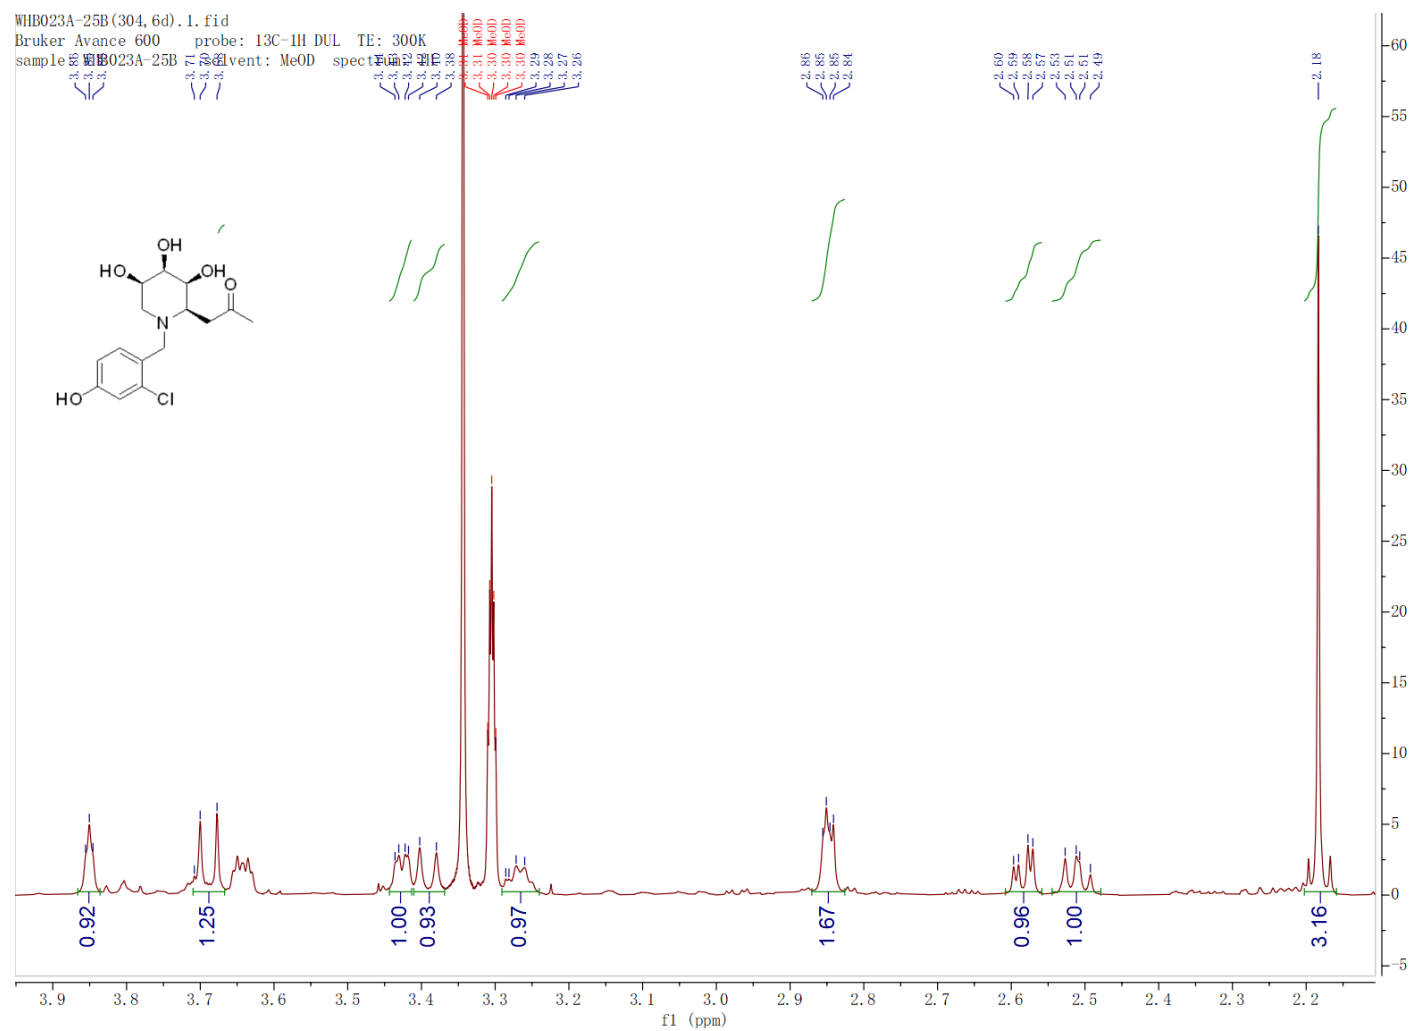

**Figure S131.** Partial region amplification of the  $^1\text{H}$  NMR of compound **6d**.



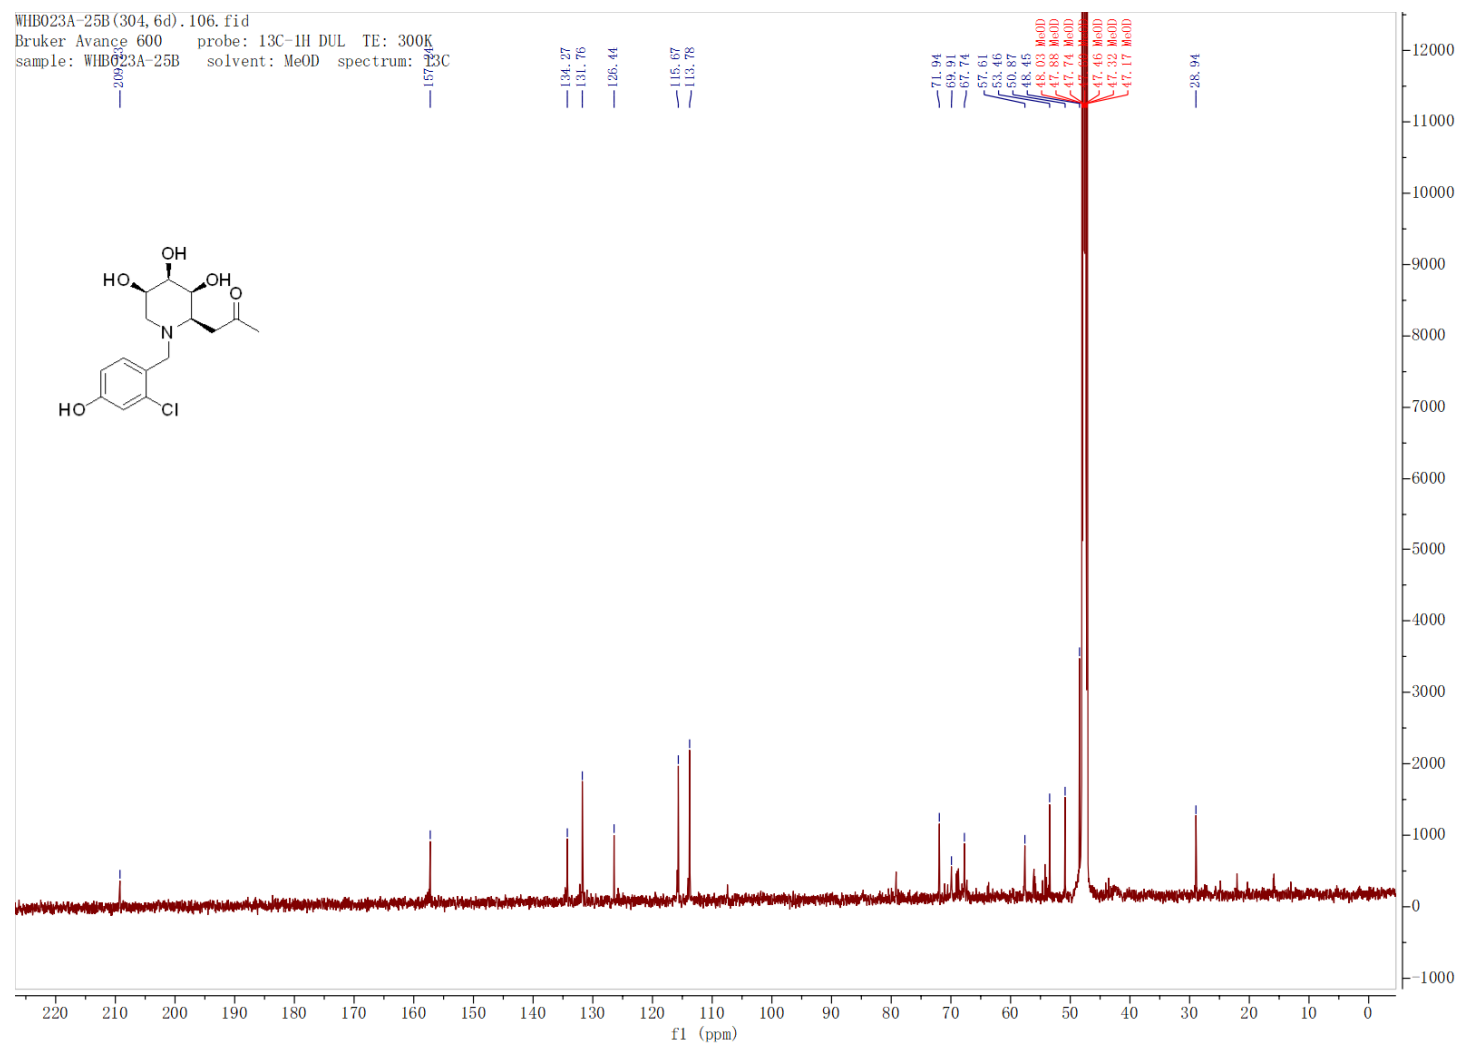

Figure S132. The  $^{13}\text{C}$  NMR of compound 6d.

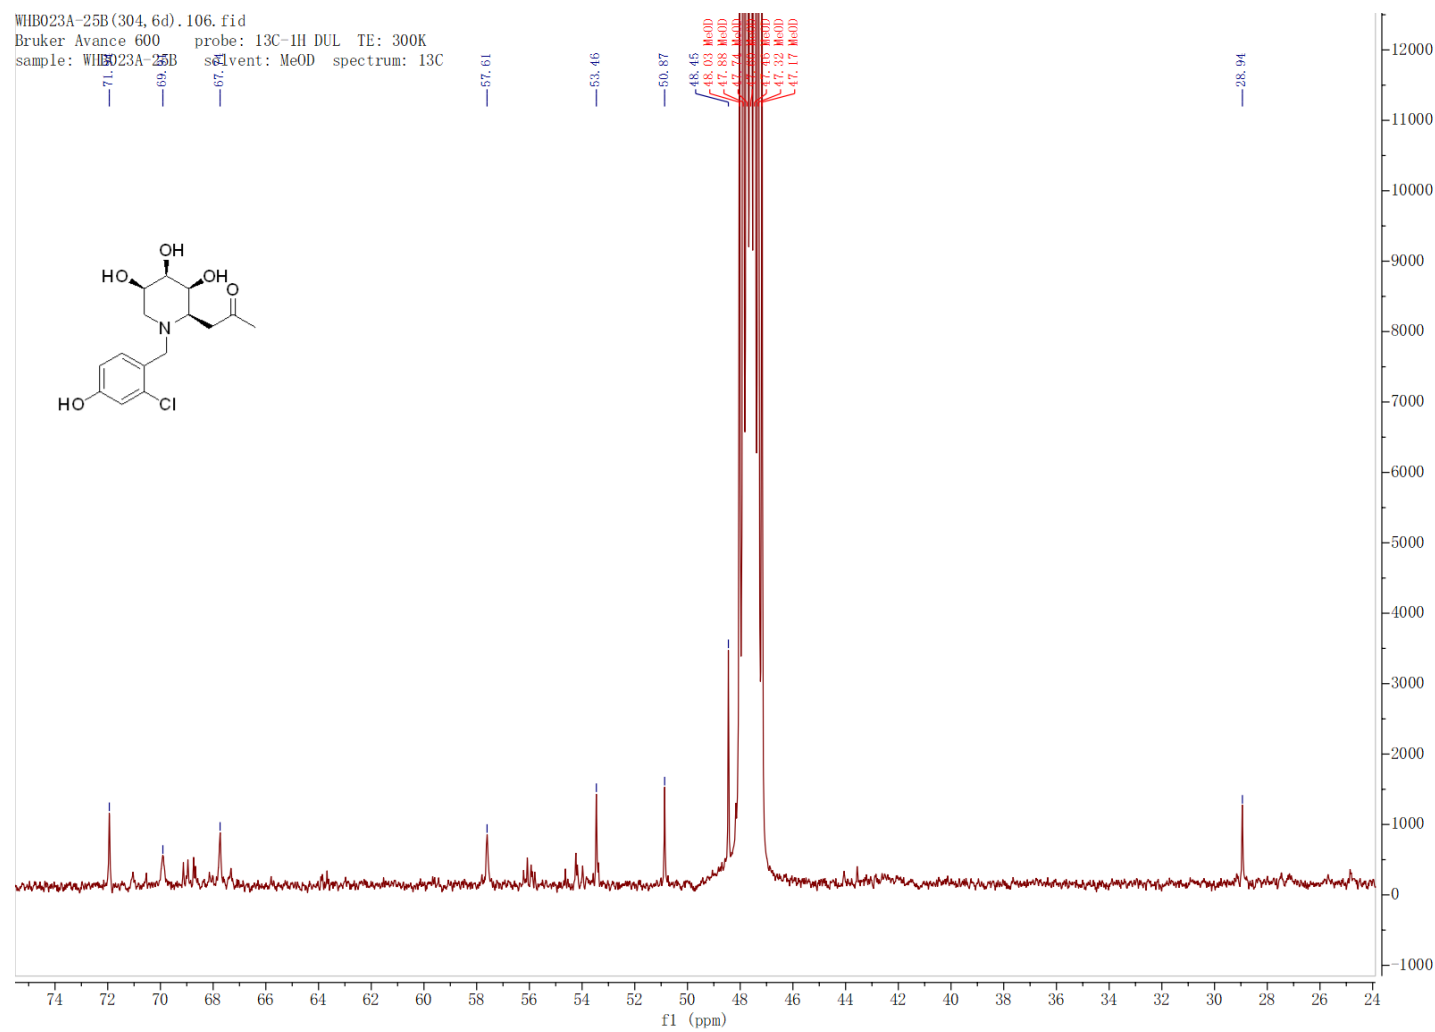

**Figure S133.** Partial region amplification of the  $^{13}\text{C}$  NMR of compound **6d**.

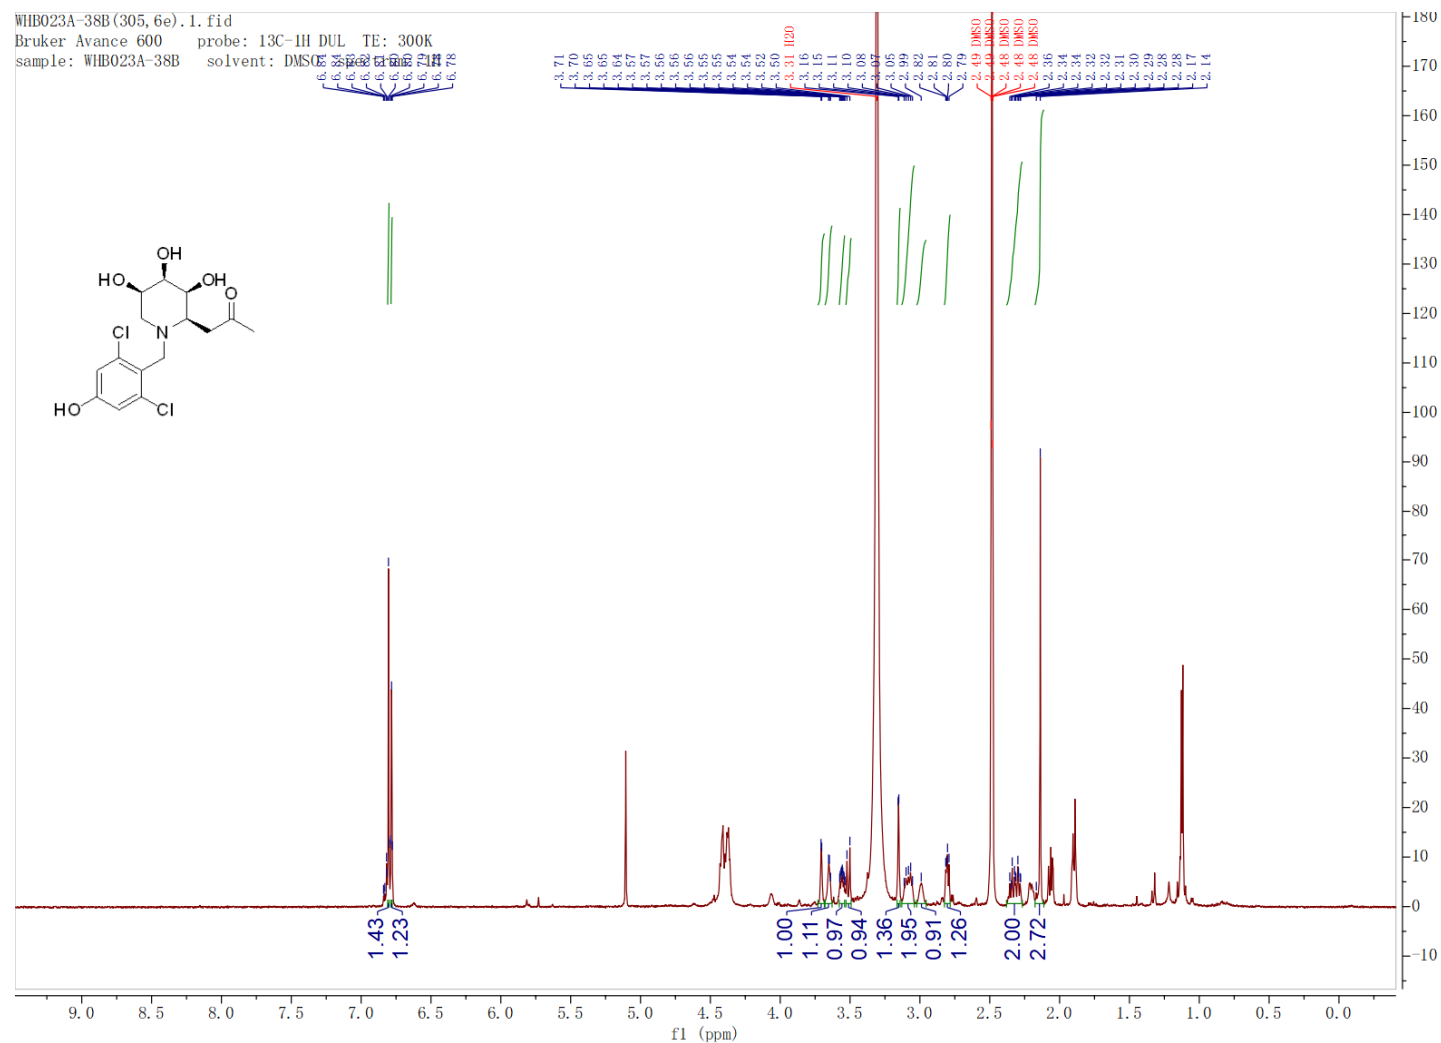

Figure S134. The  $^1\text{H}$  NMR of compound 6e.

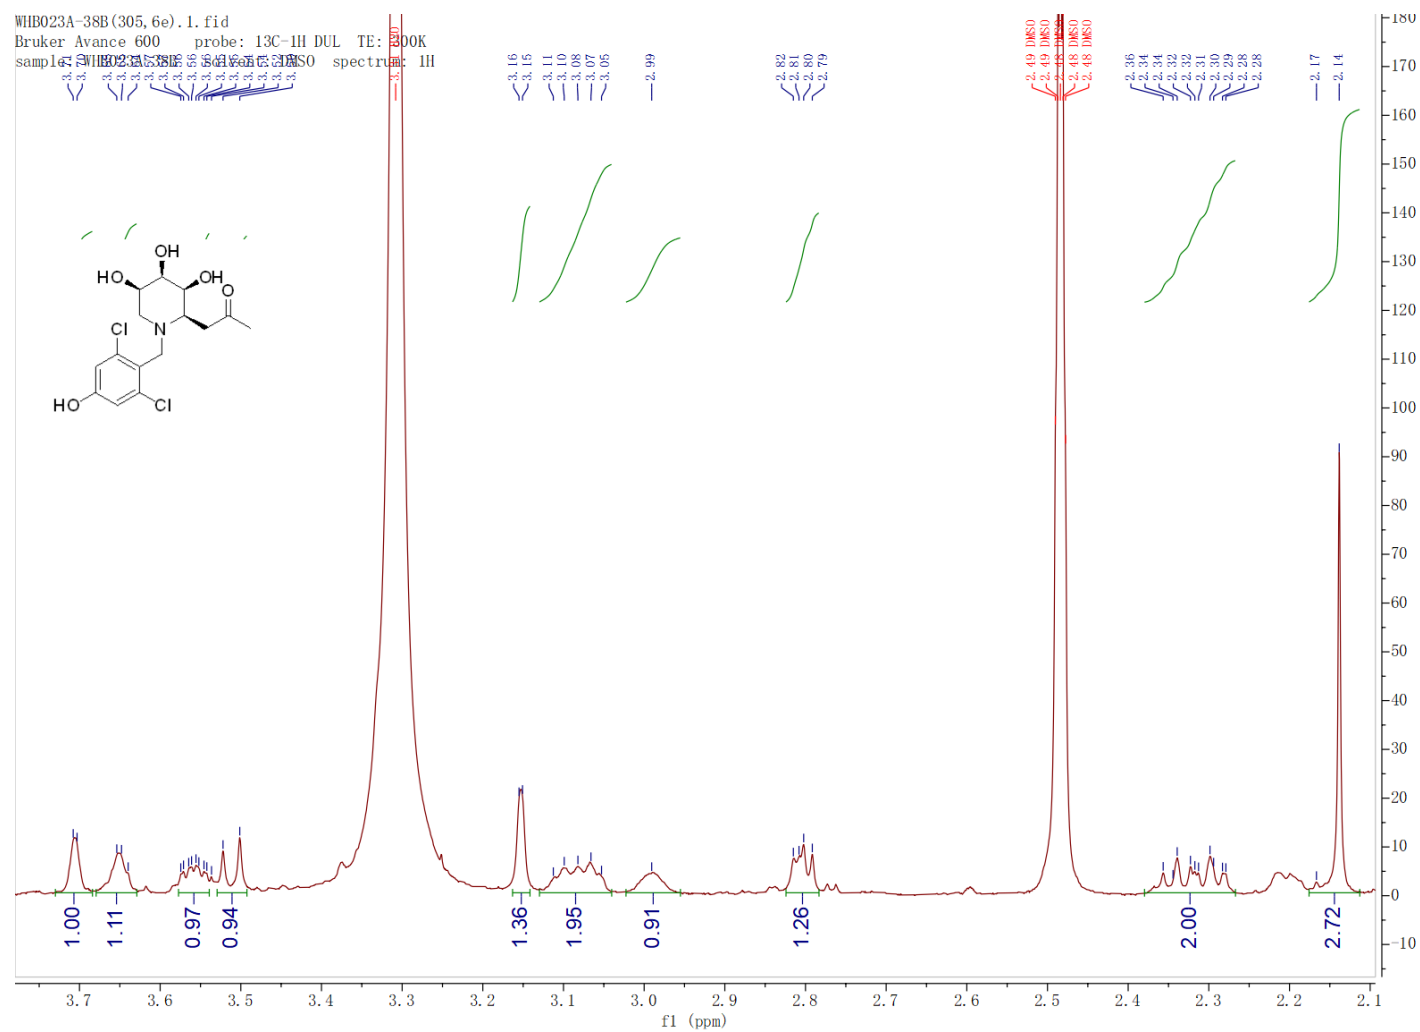

Figure S135. Partial region amplification of the  $^1\text{H}$  NMR of compound 6e.

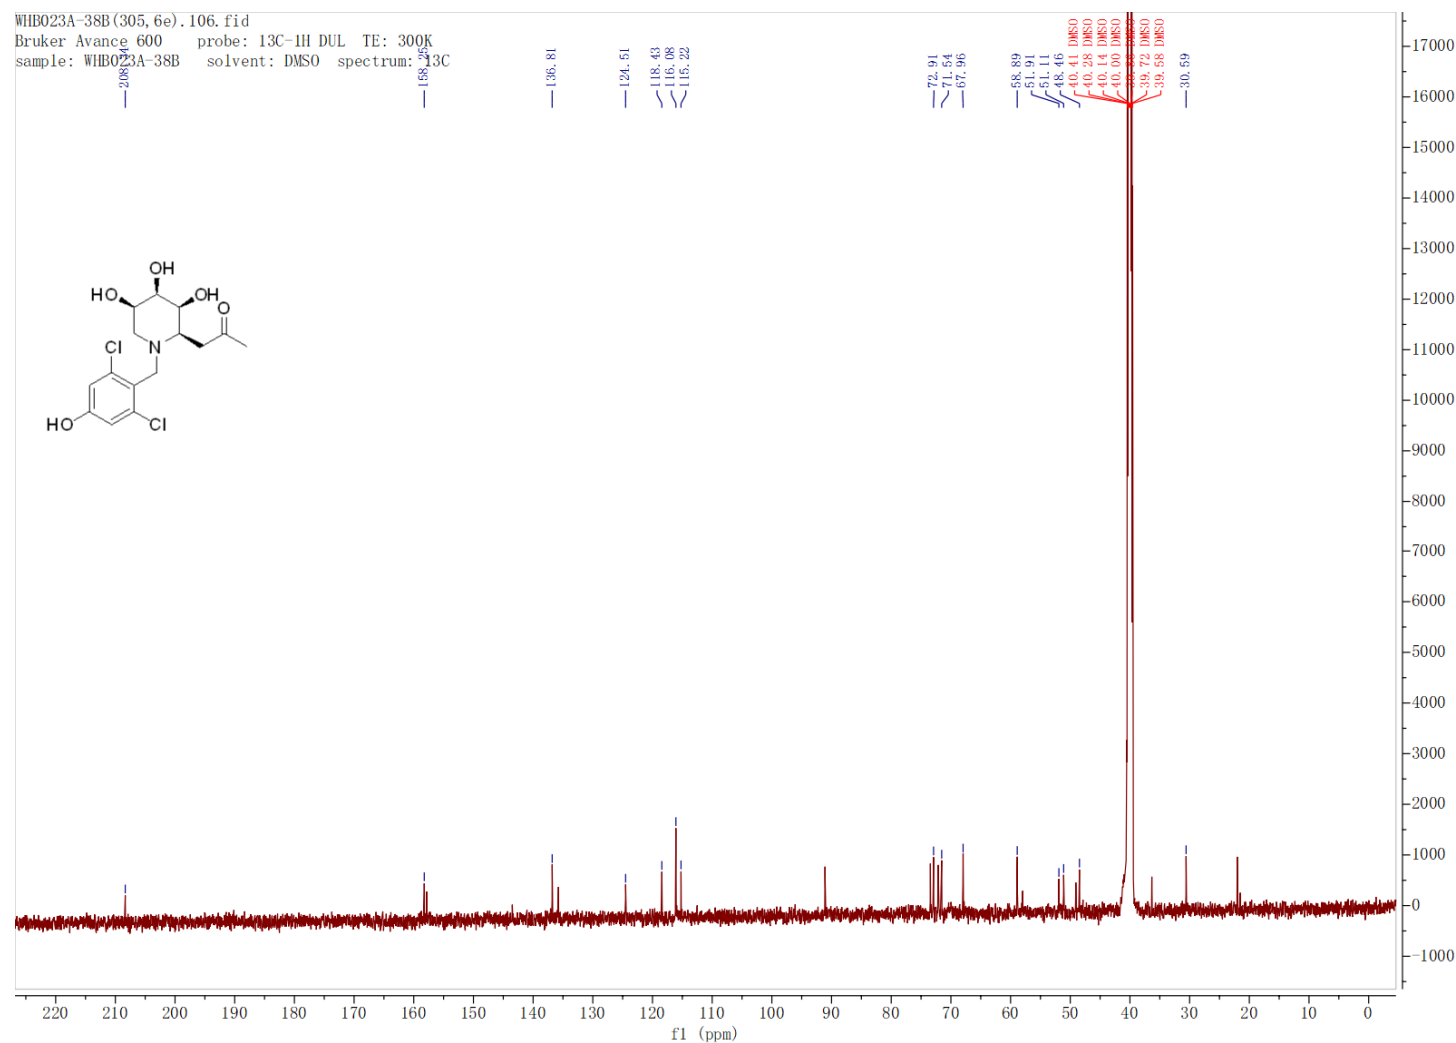

Figure S136. The  $^{13}\text{C}$  NMR of compound 6e.

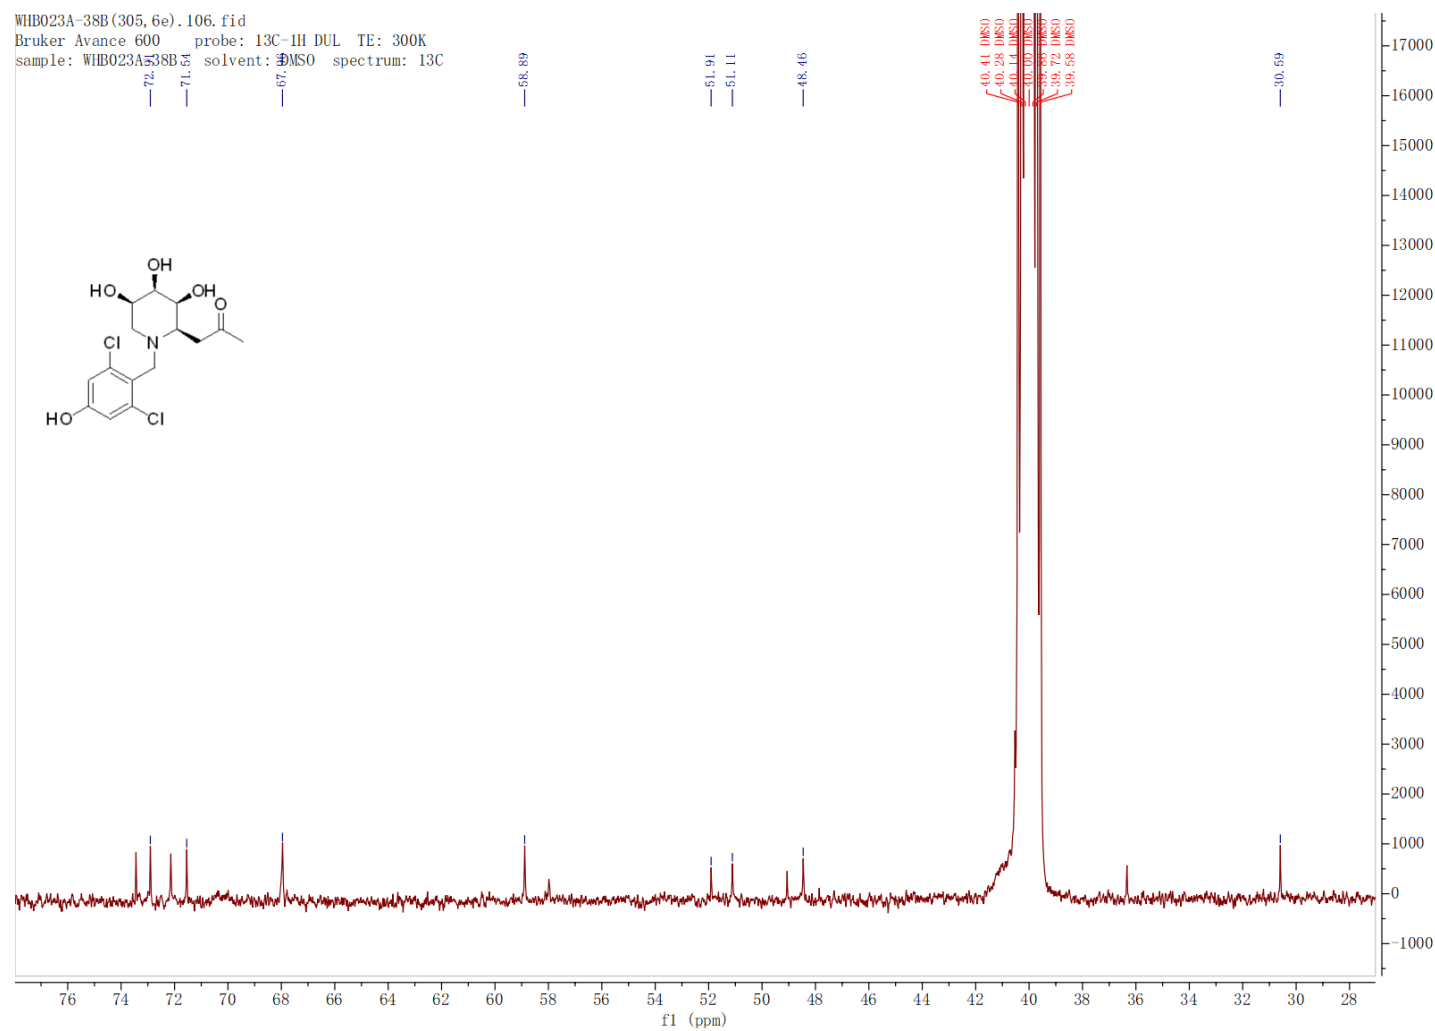

**Figure S137.** Partial region amplification of the  $^{13}\text{C}$  NMR of compound **6e**.

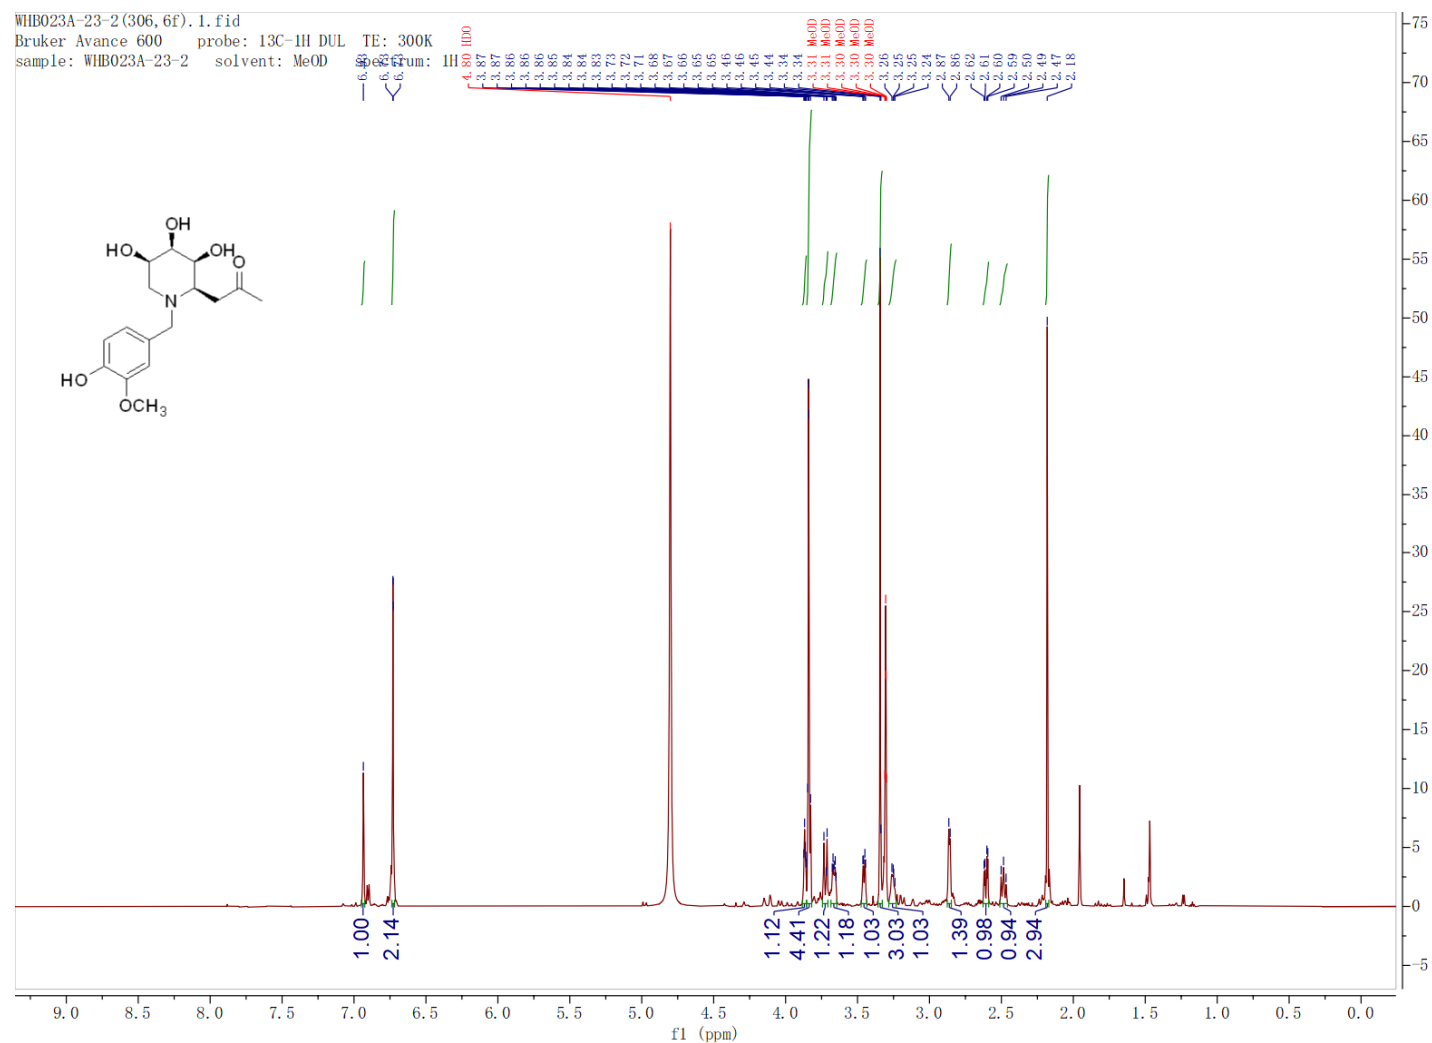

Figure S138. The  $^1\text{H}$  NMR of compound 6f.

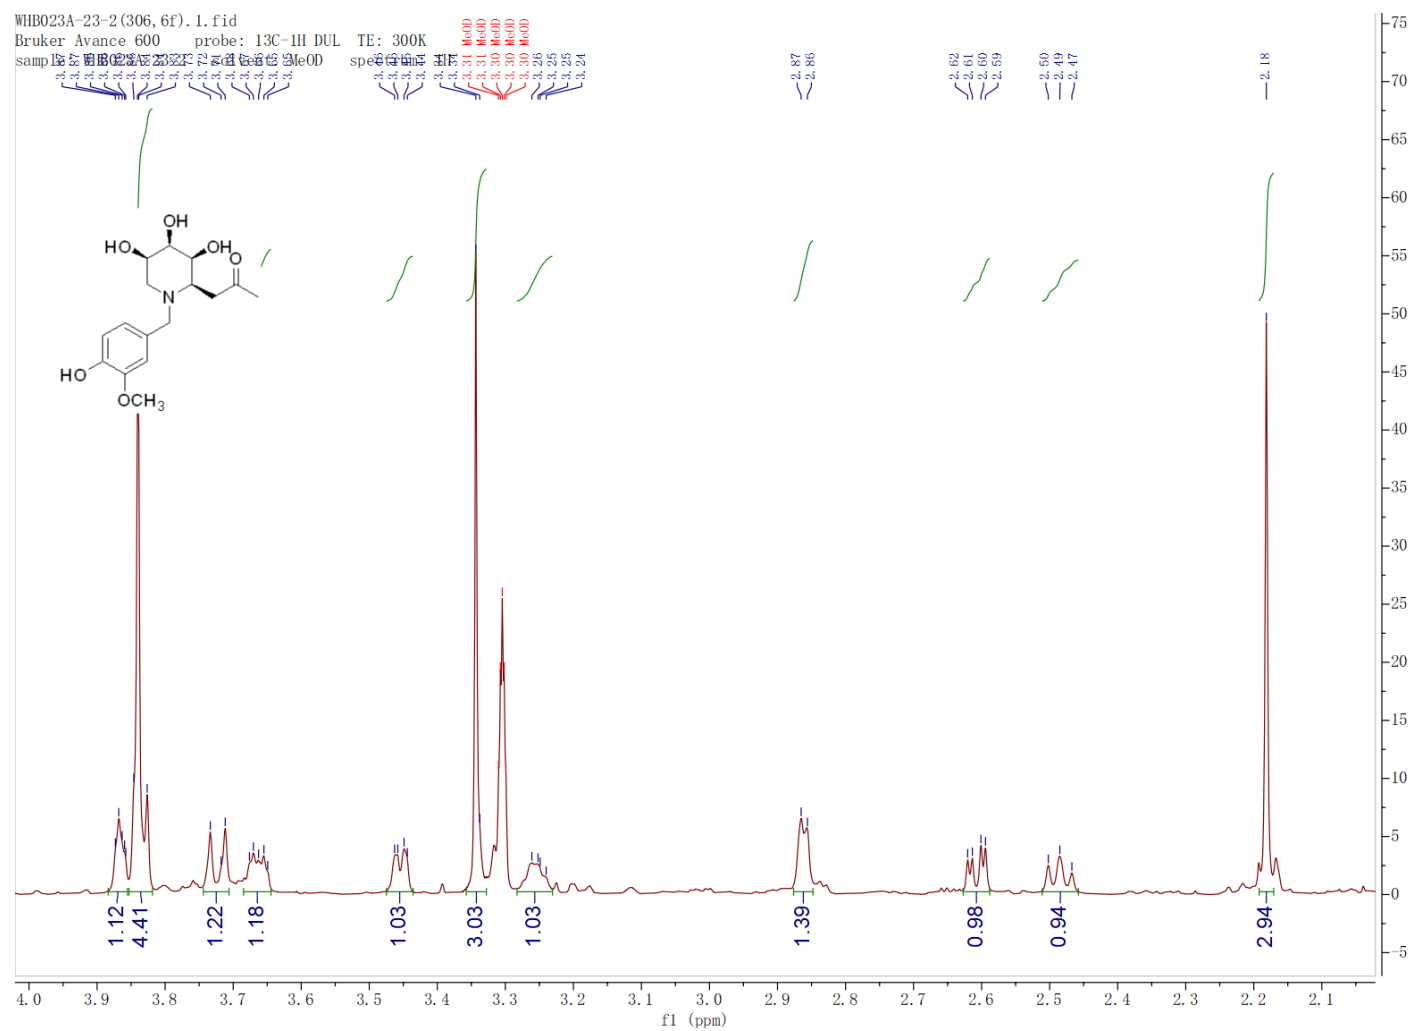

Figure S139. Partial region amplification of the  $^1\text{H}$  NMR of compound 6f.



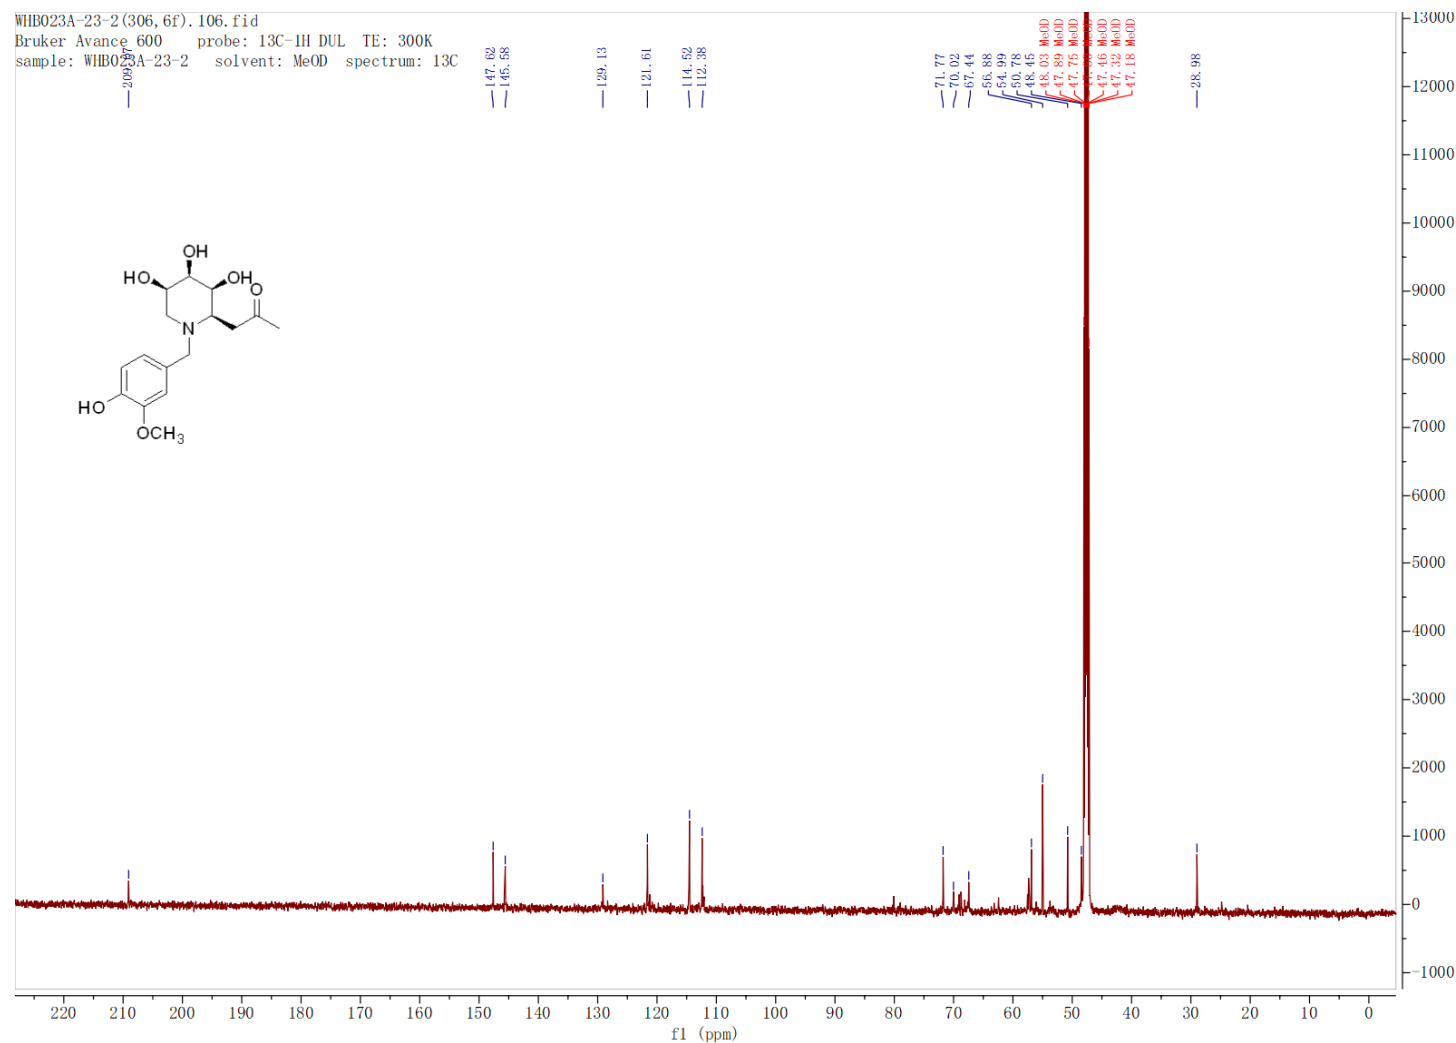

Figure S140. The  $^{13}\text{C}$  NMR of compound 6f.

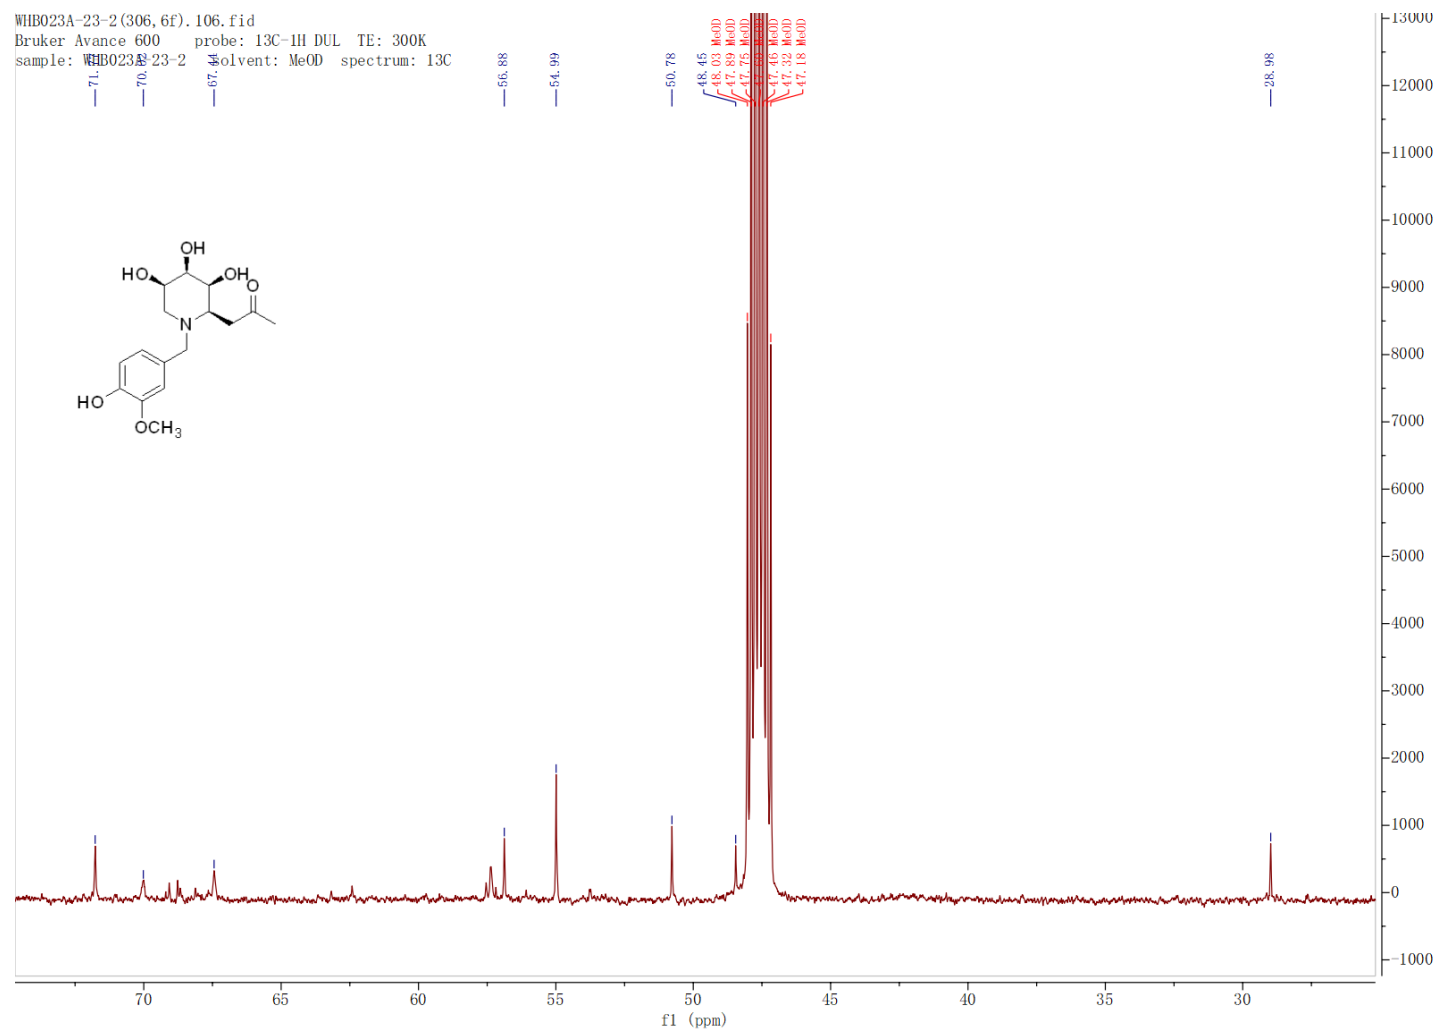

**Figure S141.** Partial region amplification of the  $^{13}\text{C}$  NMR of compound **6f**.

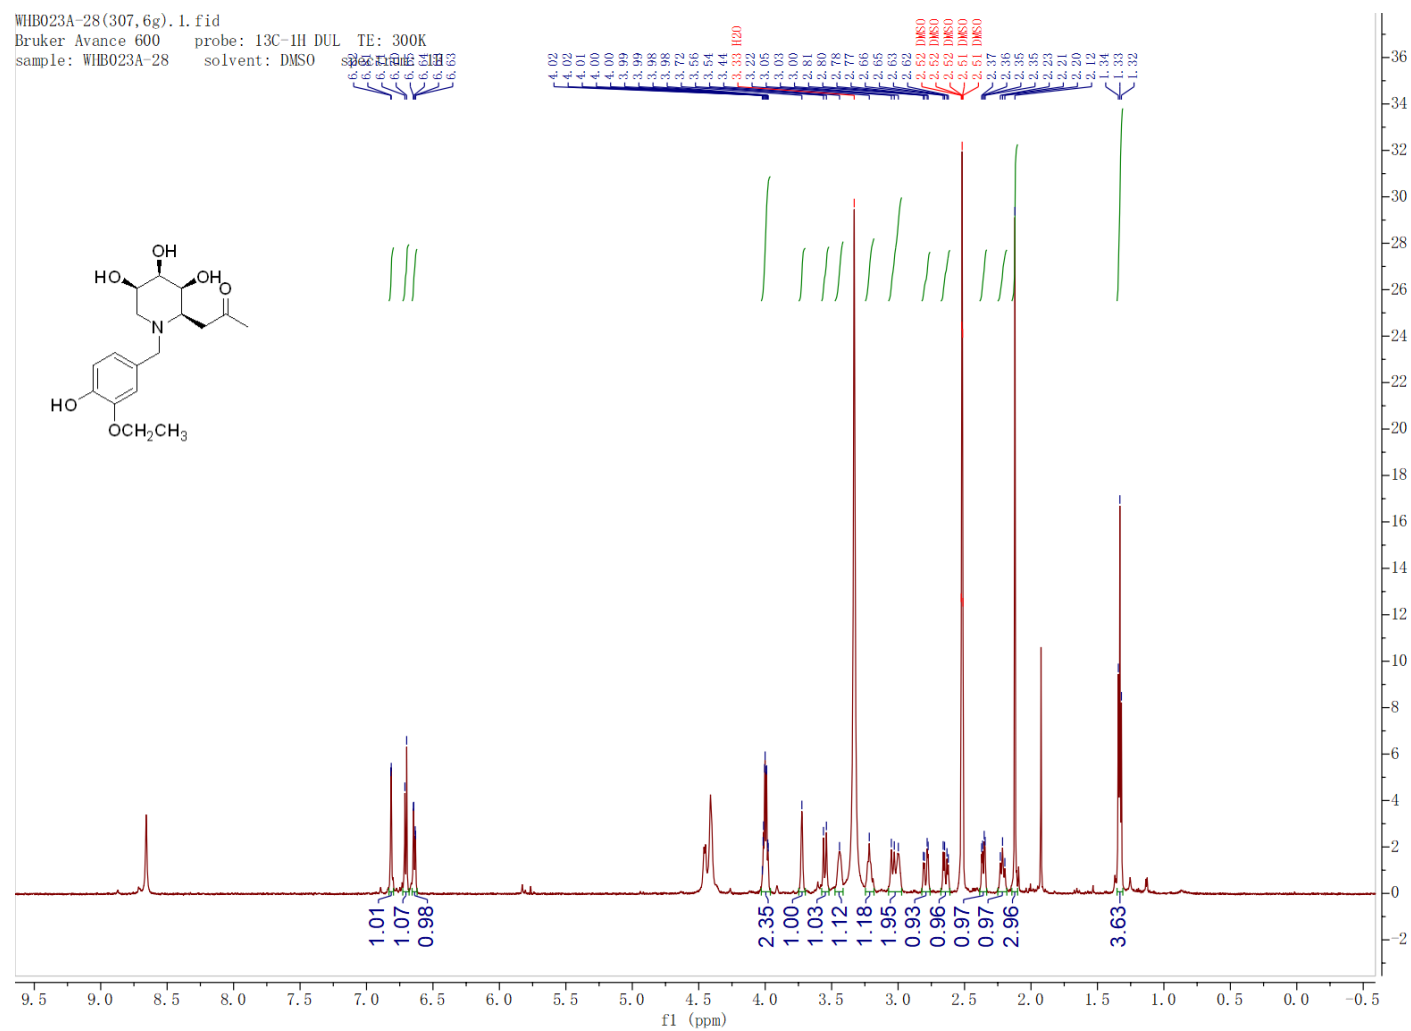

Figure S142. The  $^1\text{H}$  NMR of compound 6g.

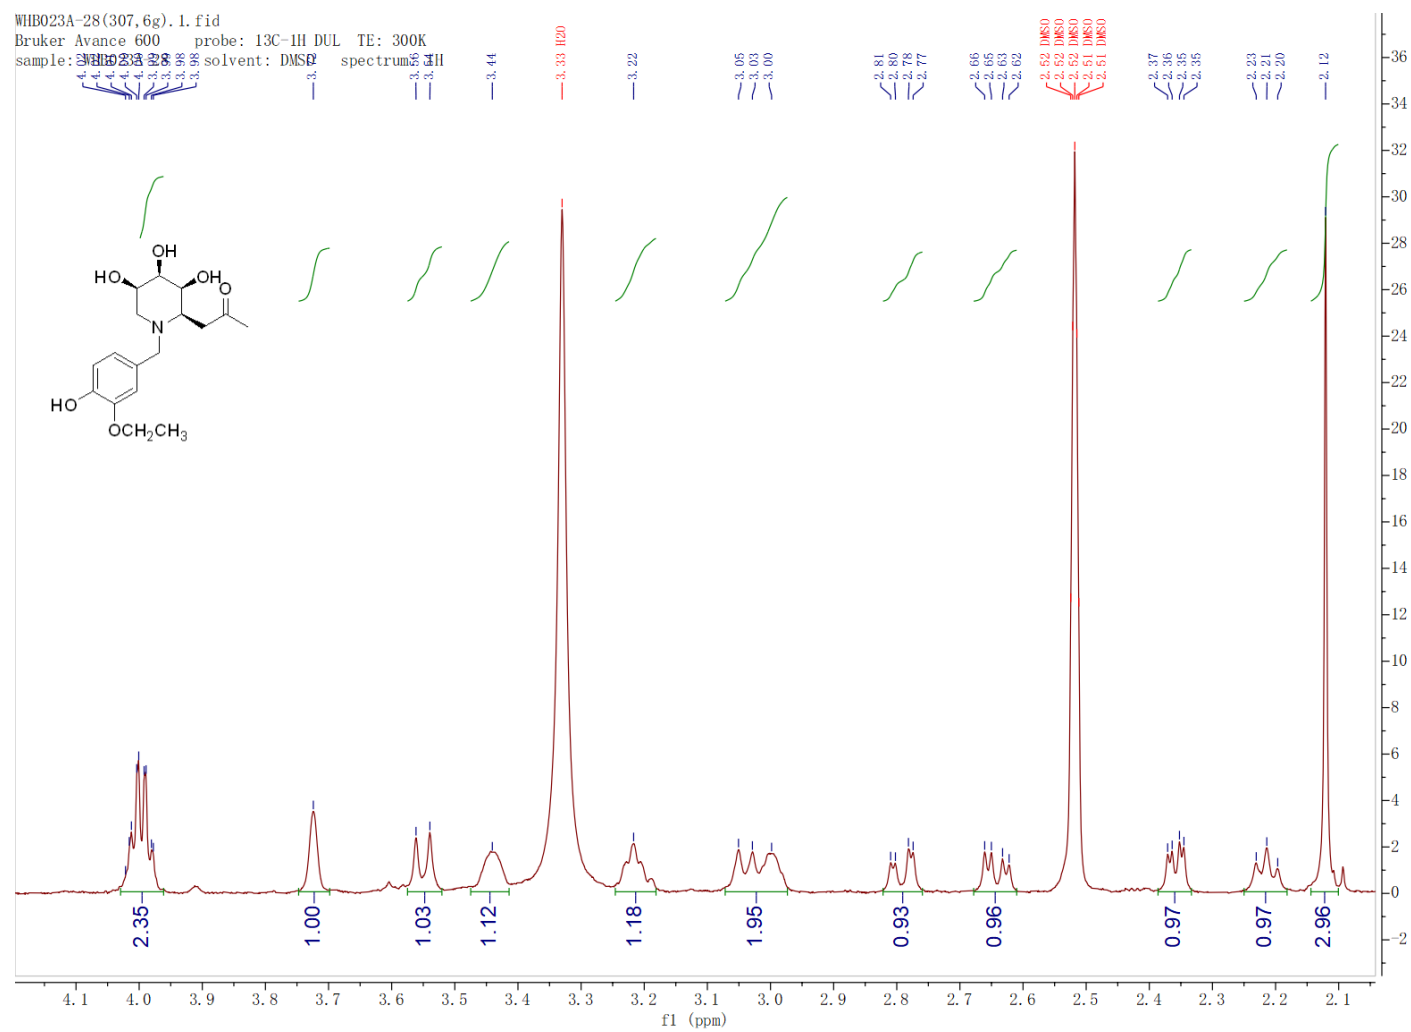

Figure S143. Partial region amplification of the  $^1\text{H}$  NMR of compound 6g.

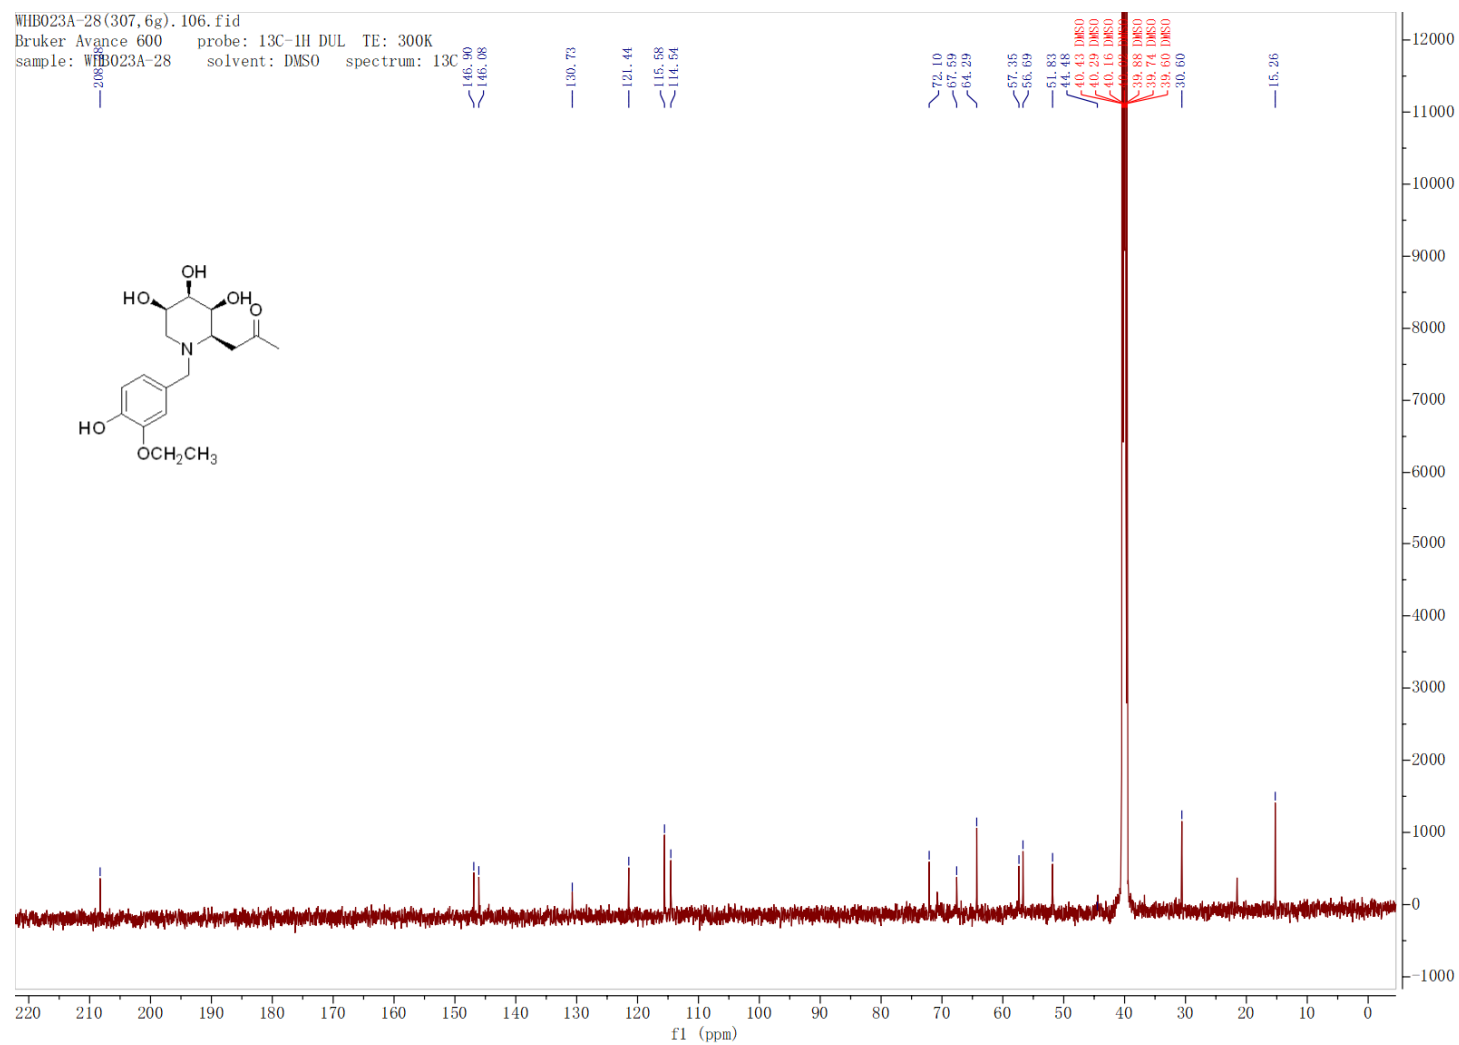

Figure S144. The  $^{13}\text{C}$  NMR of compound 6g.

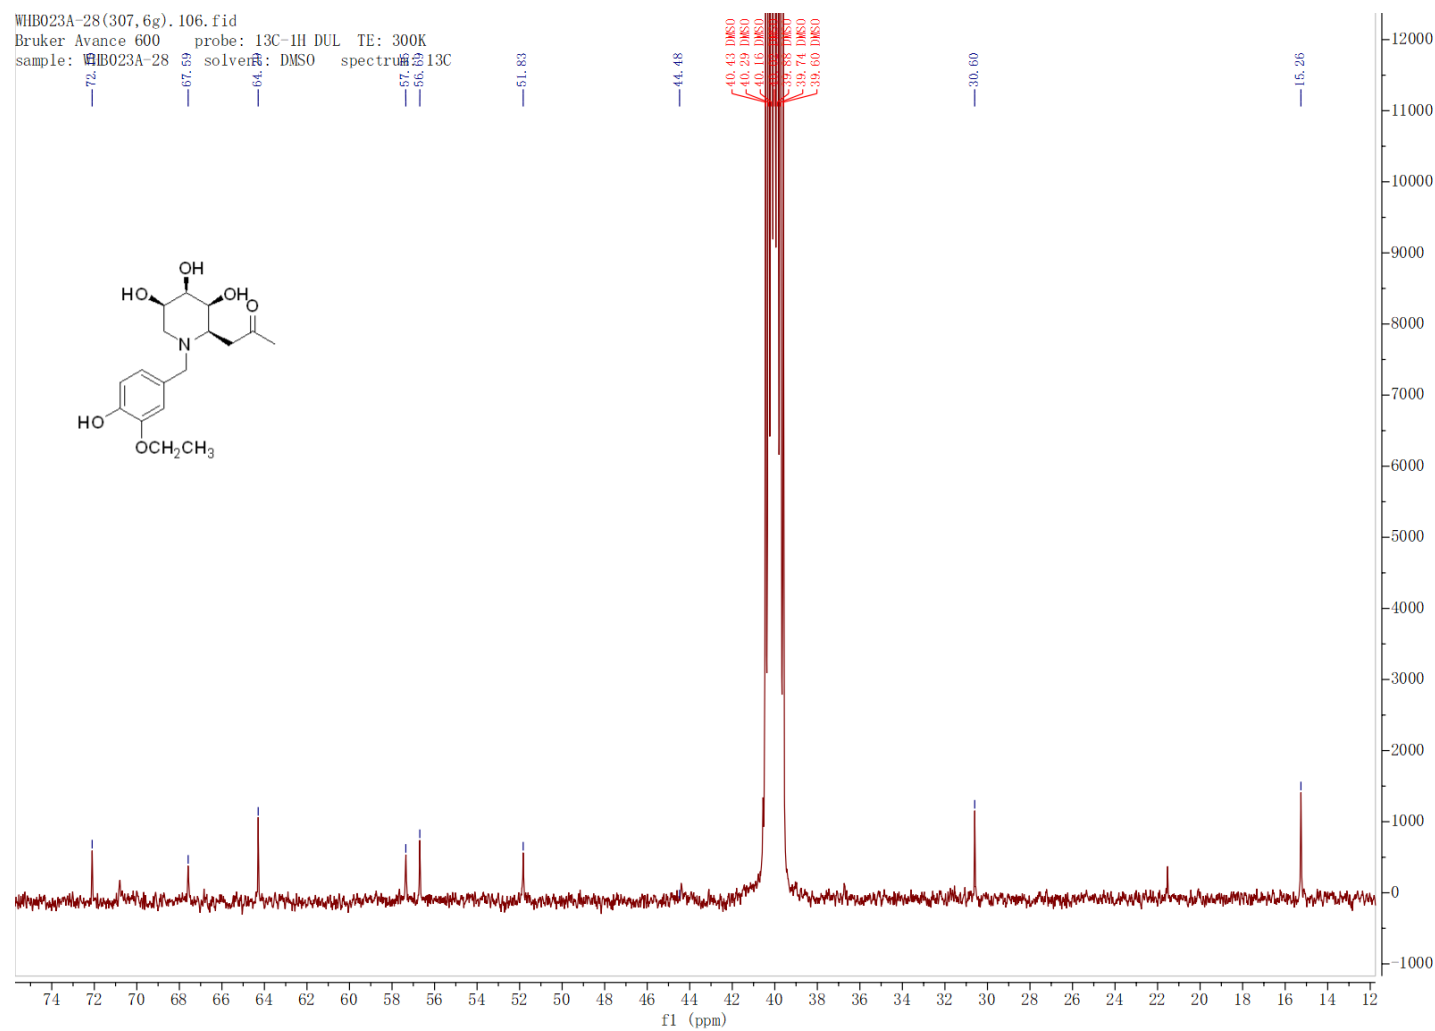

**Figure S145.** Partial region amplification of the  $^{13}\text{C}$  NMR of compound **6g**.

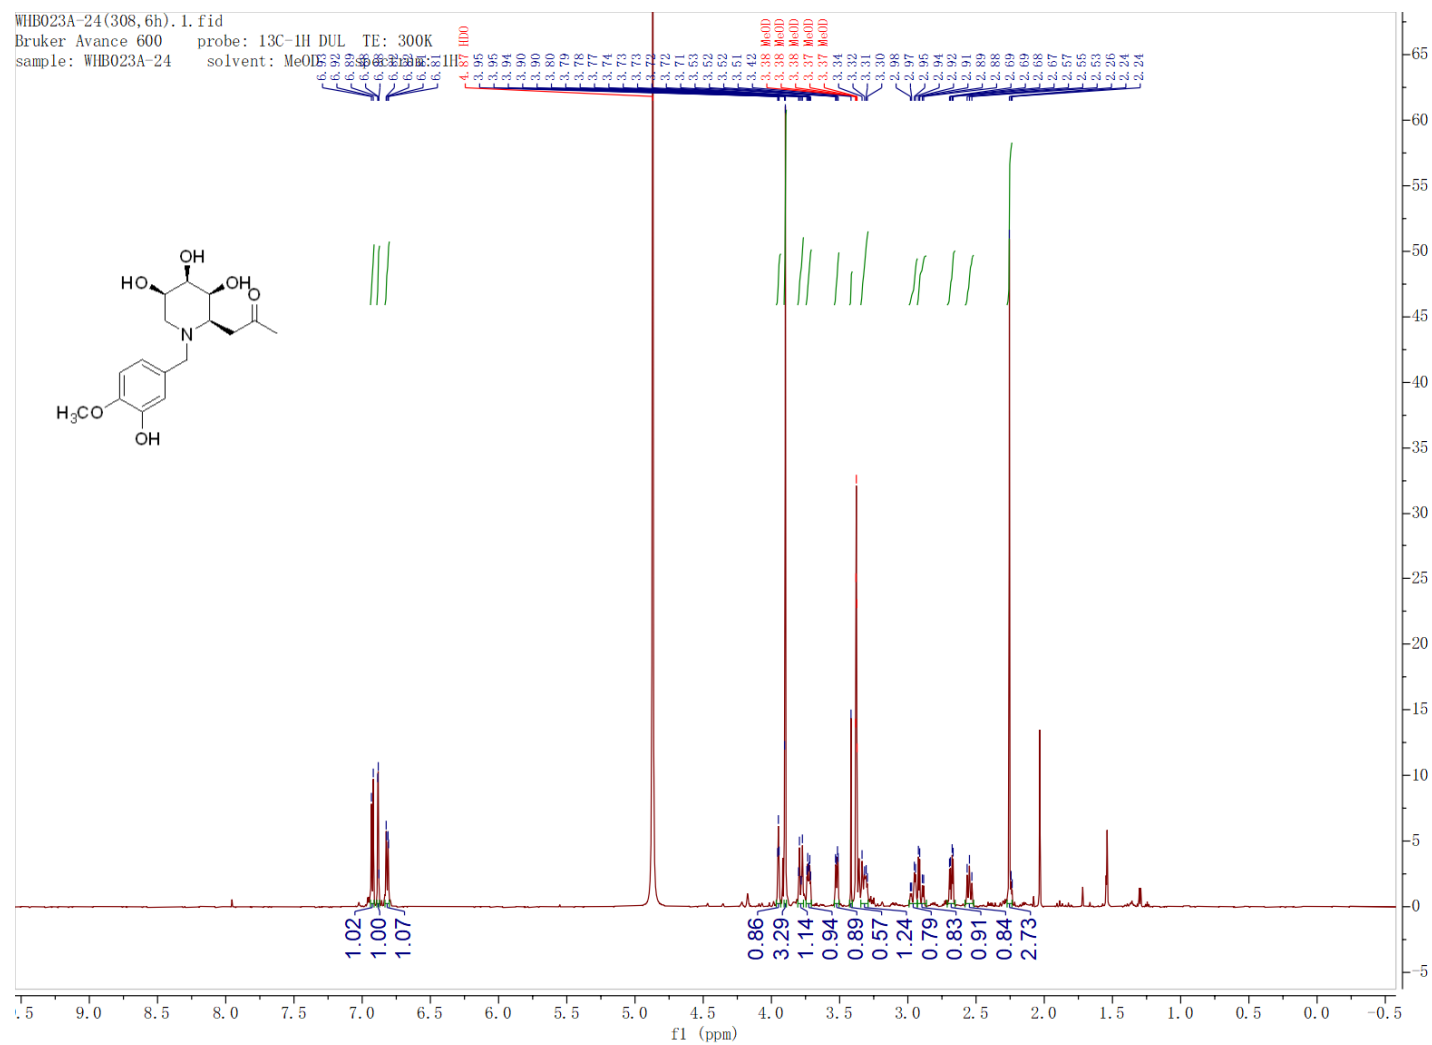

Figure S146. The  $^1\text{H}$  NMR of compound 6h.

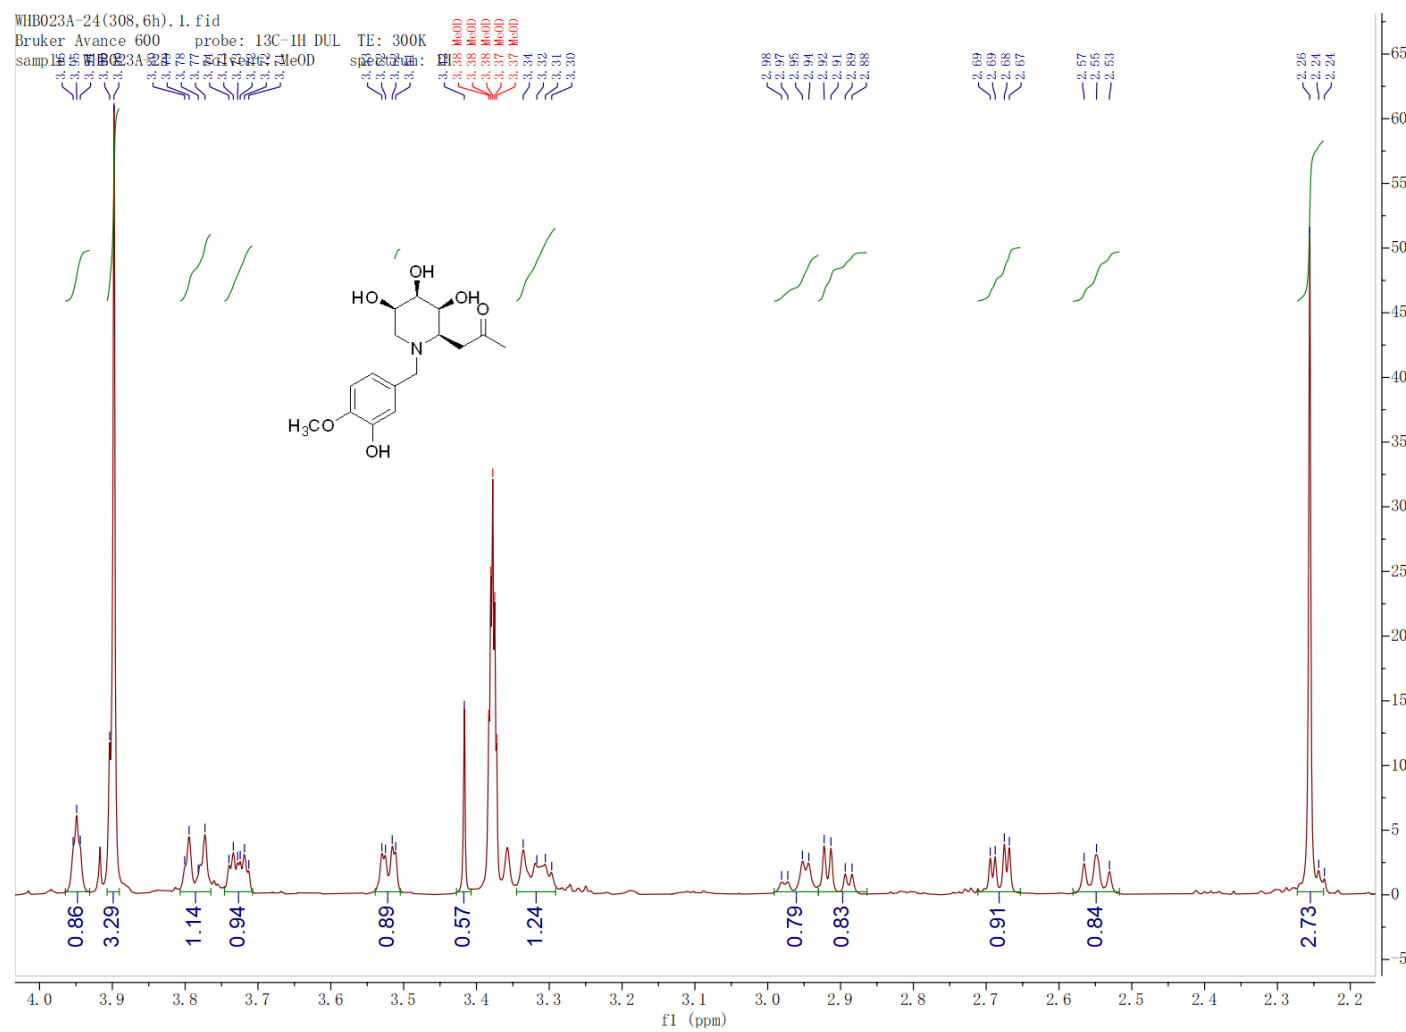

Figure S147. Partial region amplification of the  $^1\text{H}$  NMR of compound 6h.



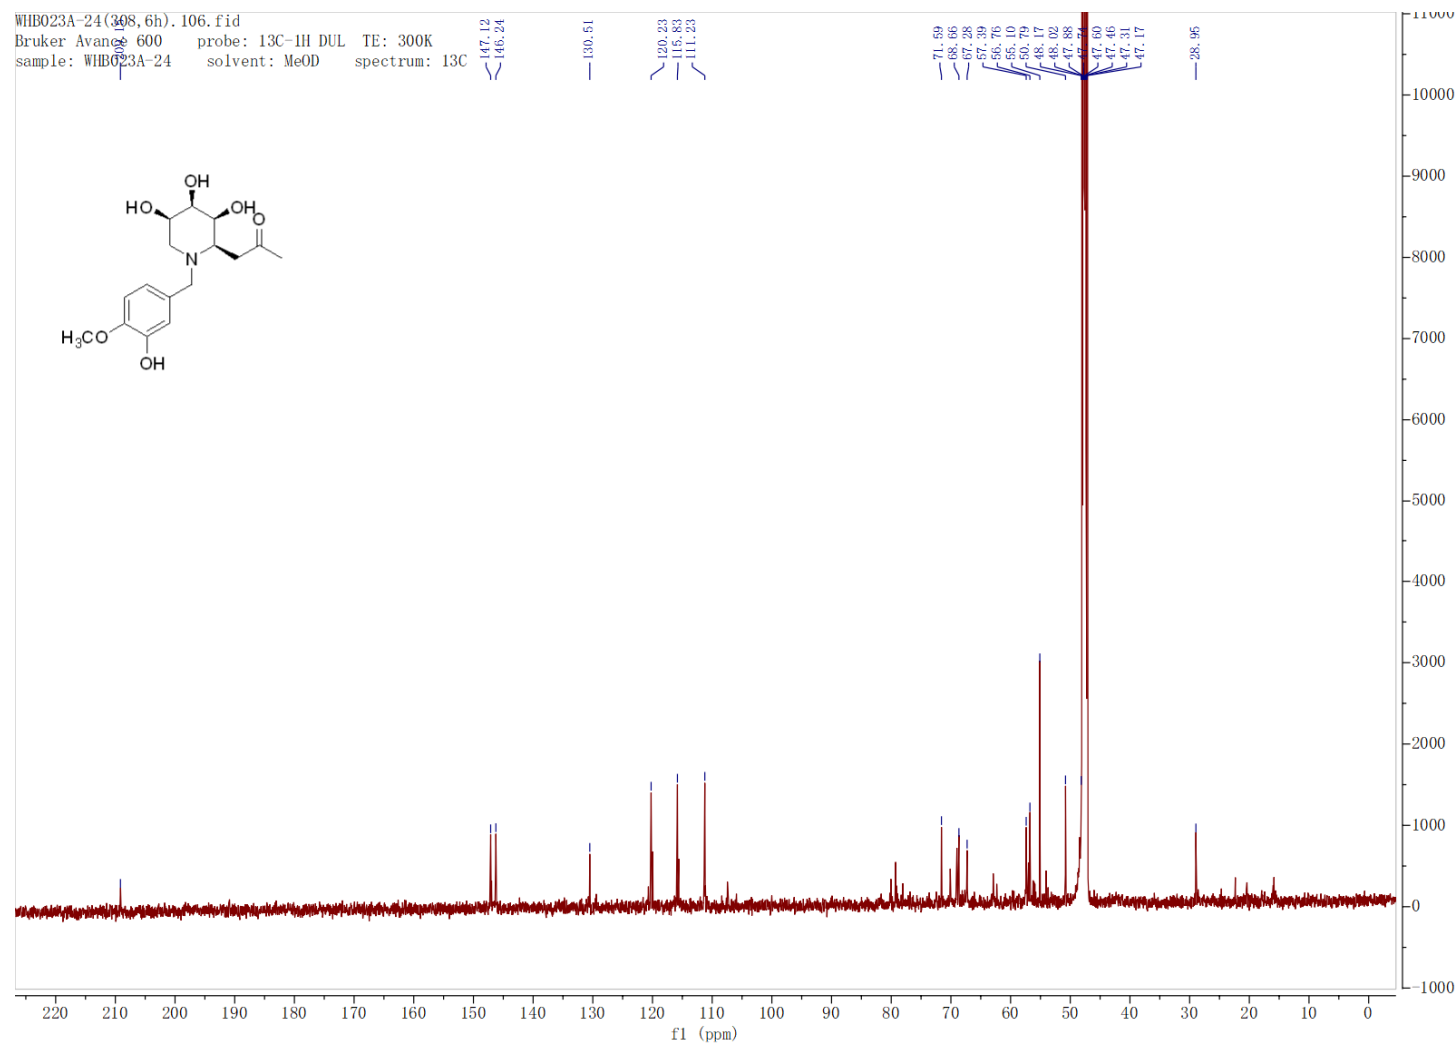

Figure S148. The  $^{13}\text{C}$  NMR of compound **6h**.

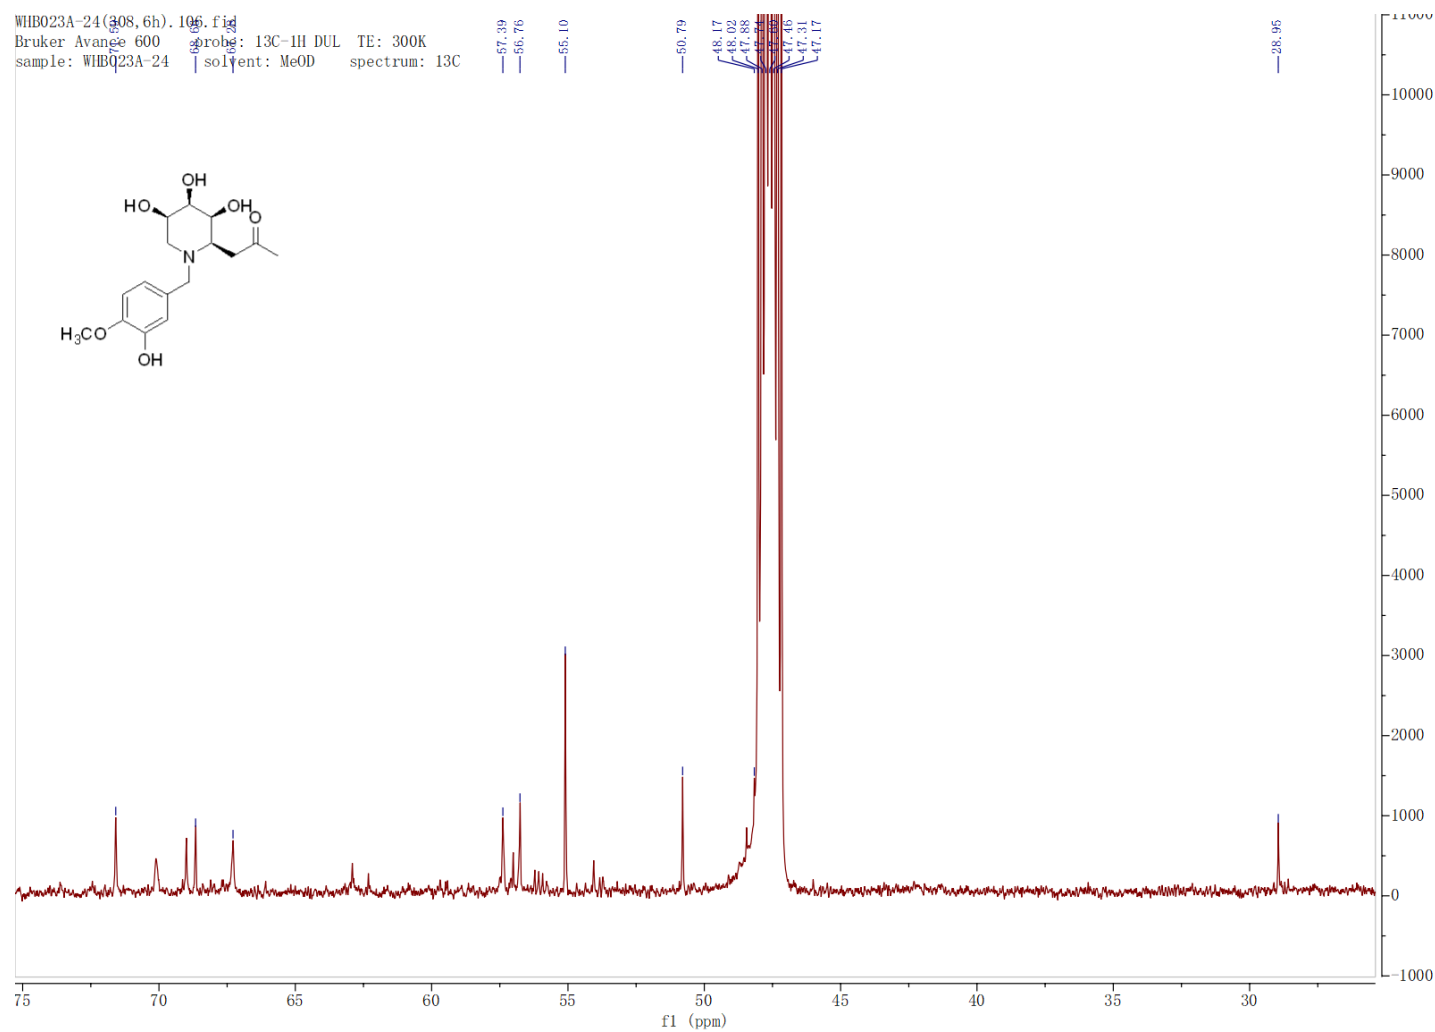

**Figure S149.** Partial region amplification of the  $^{13}\text{C}$  NMR of compound **6h**.

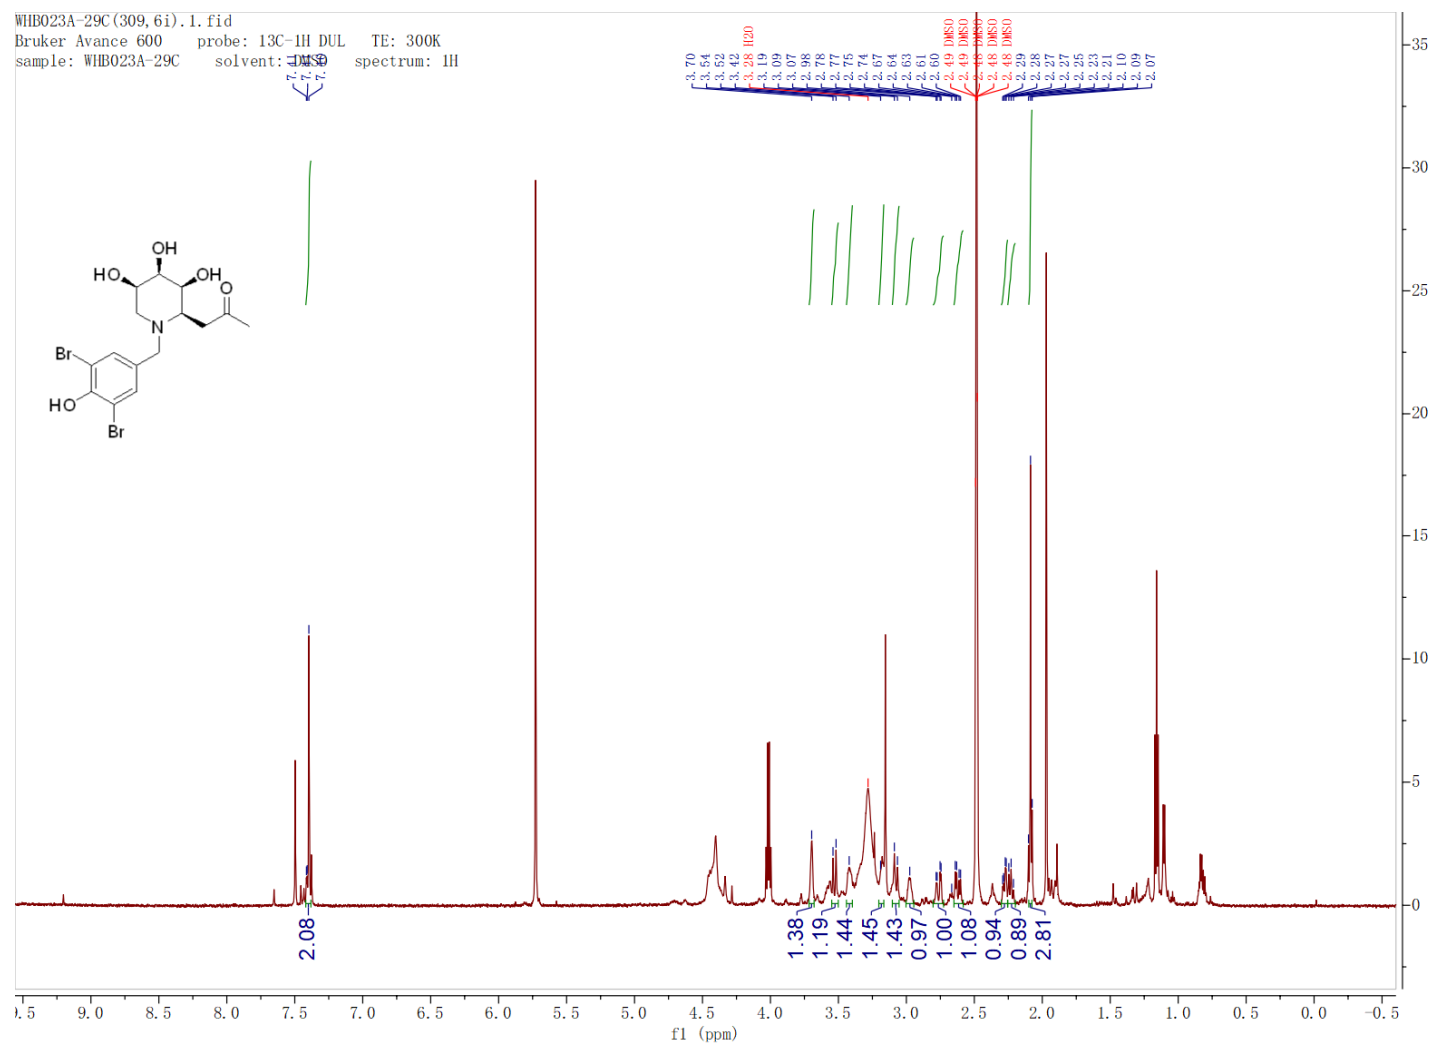

Figure S150. The  $^1\text{H}$  NMR of compound 6i.

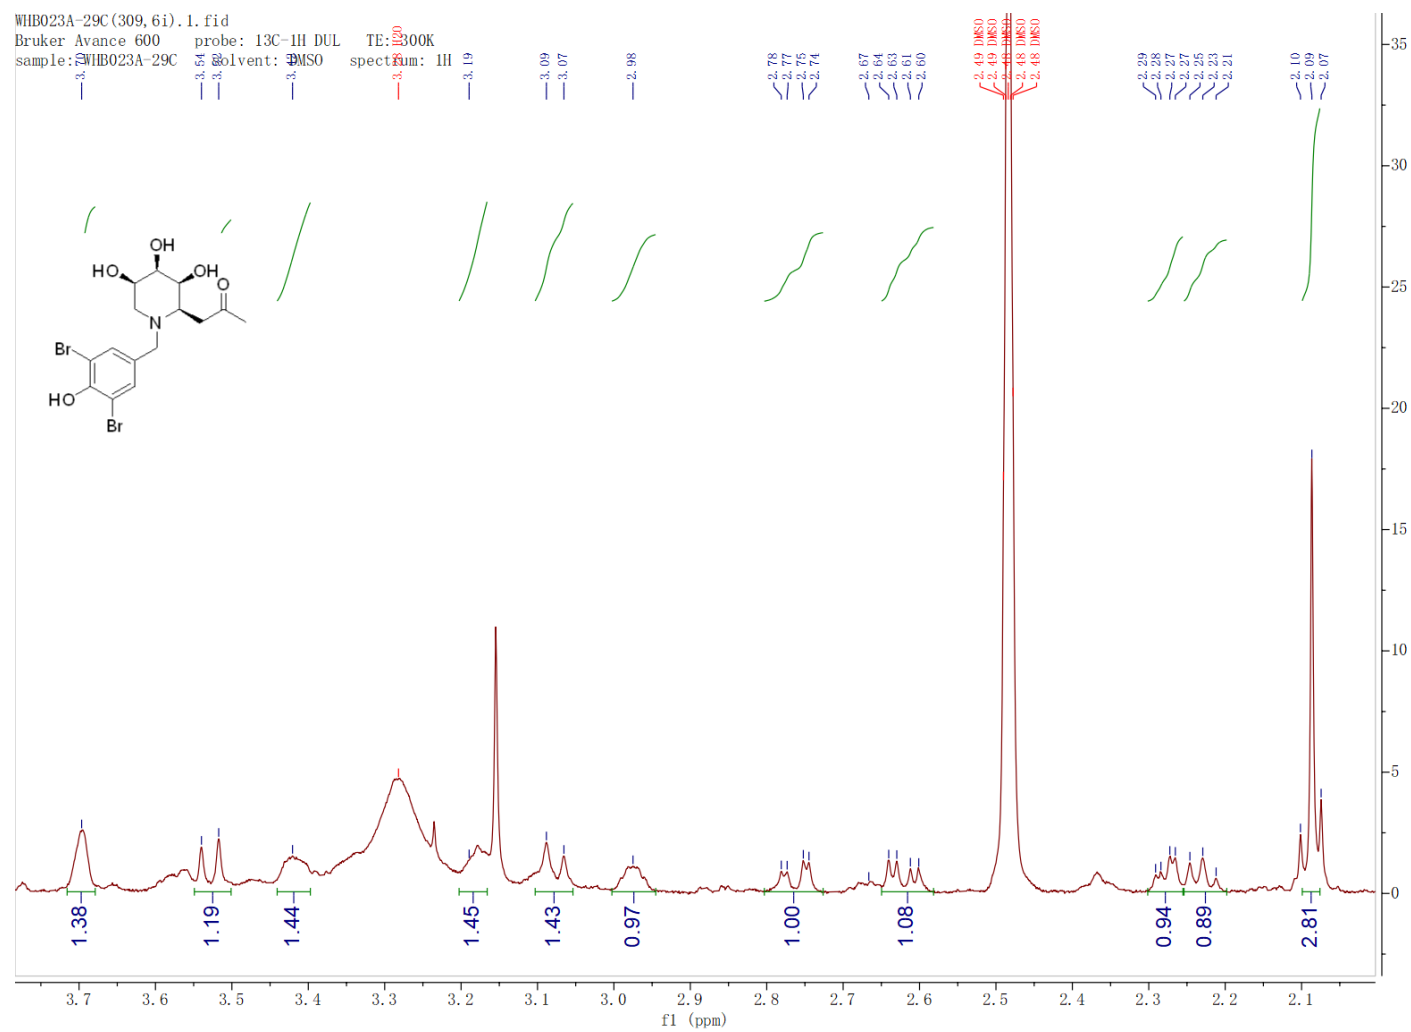

**Figure S151.** Partial region amplification of the  $^1\text{H}$  NMR of compound **6i**.

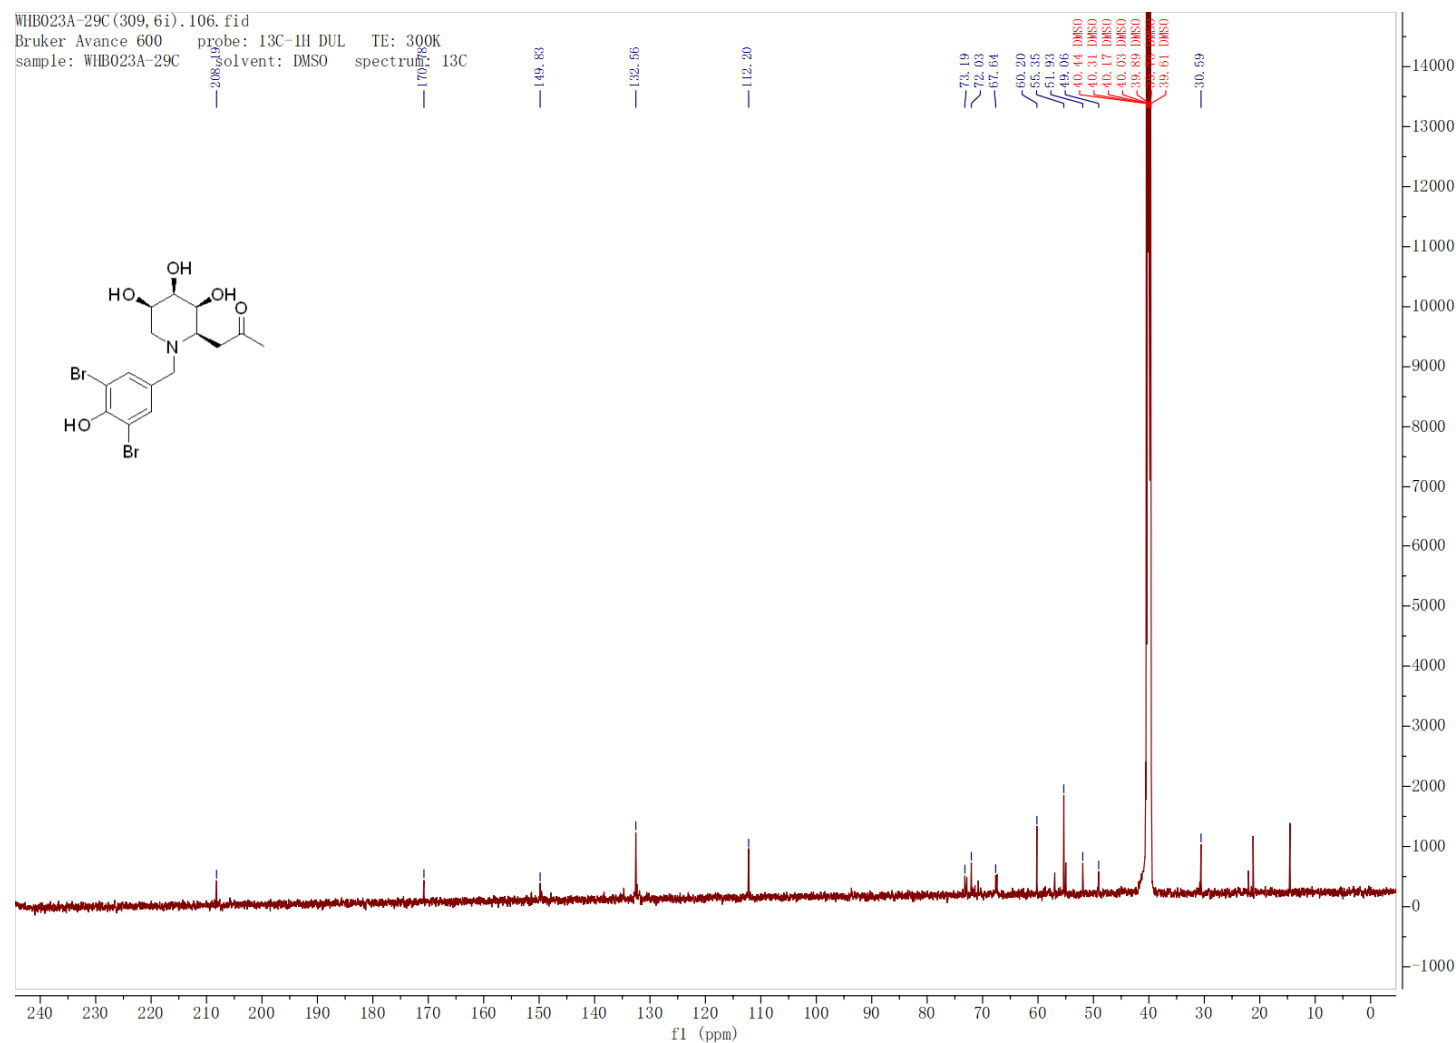

Figure S152. The  $^{13}\text{C}$  NMR of compound **6i**.

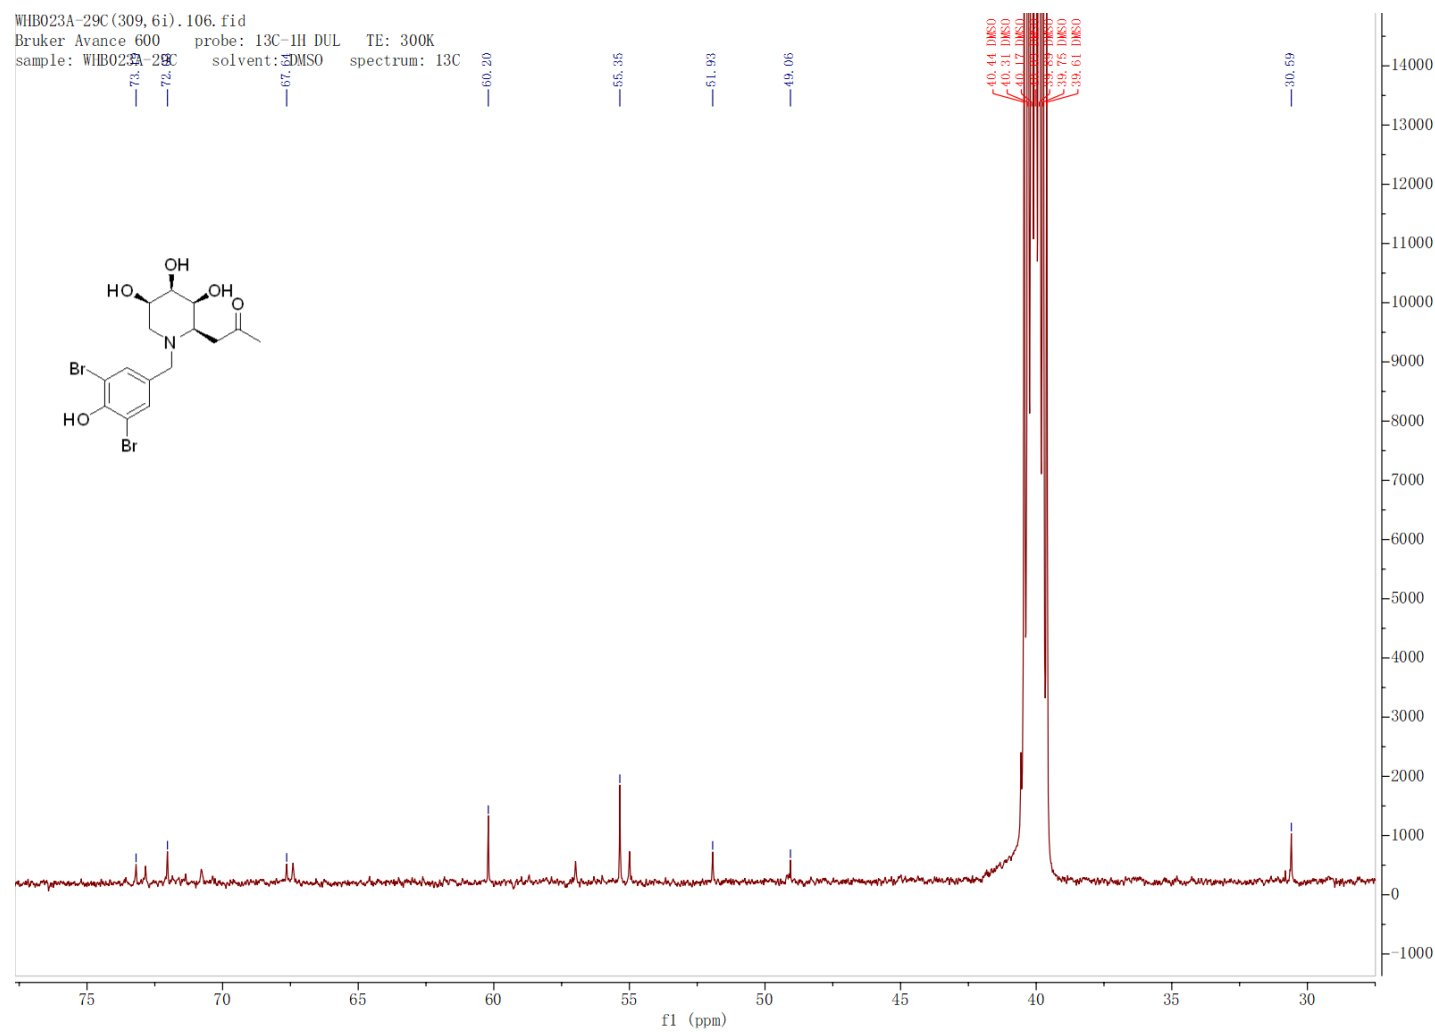

**Figure S153.** Partial region amplification of the  $^{13}\text{C}$  NMR of compound **6i**.
